# Supplementary material for: Systematic Dissection of the Sequence Determinants of Gene 3’ End Mediated Expression Control
Source: PubMed Central journal article supplement (PMC4398552; doi:10.1371/journal.pgen.1005147), 2015-04-15

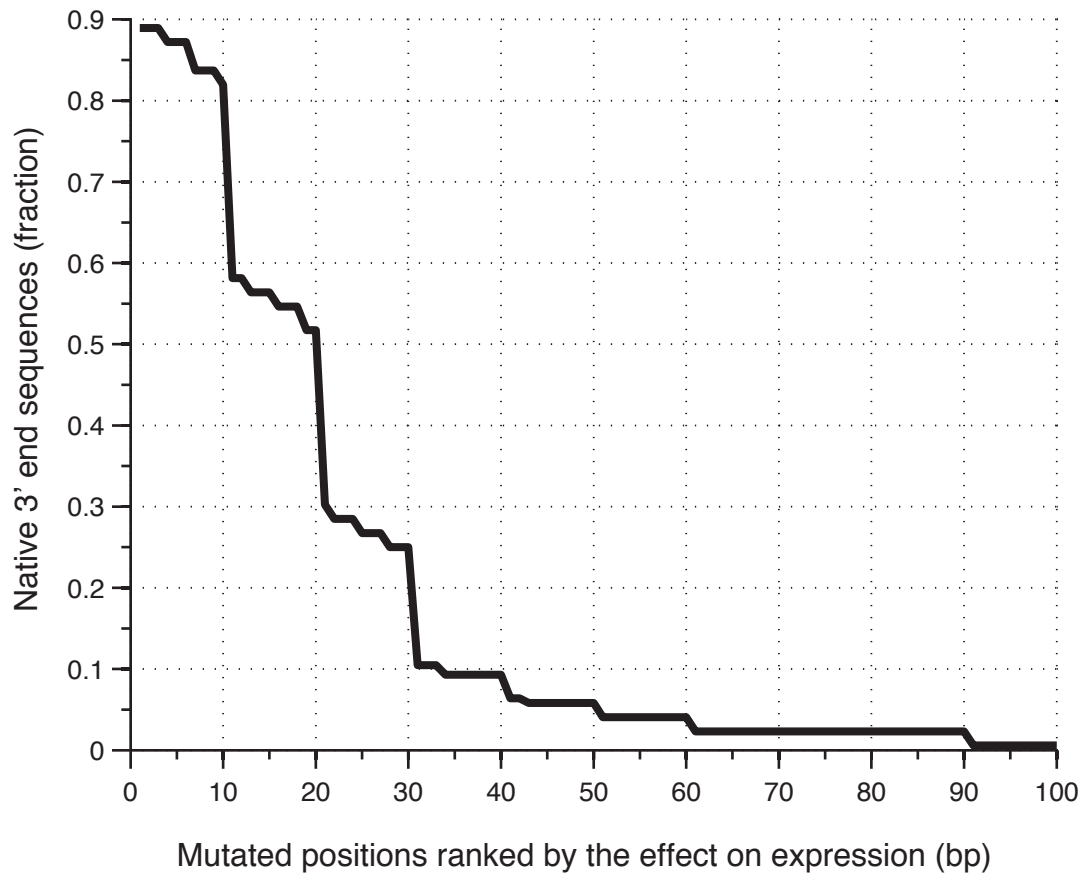

Supplement: pgen.1005147.s004.pdf [file pgen.1005147.s004.pdf]
