# Supplementary material for: Systematic Dissection of the Sequence Determinants of Gene 3’ End Mediated Expression Control
Source: PubMed Central journal article supplement (PMC4398552; doi:10.1371/journal.pgen.1005147), 2015-04-15

YDR286C

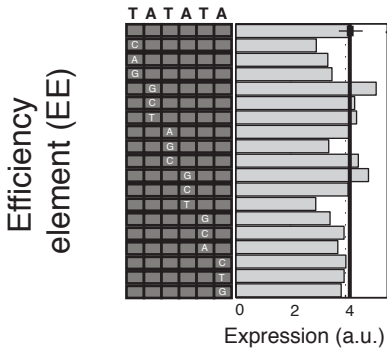

COX18  
(YGR062C)

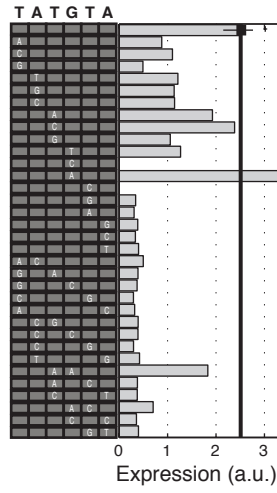

BCK1  
(YJL095W)

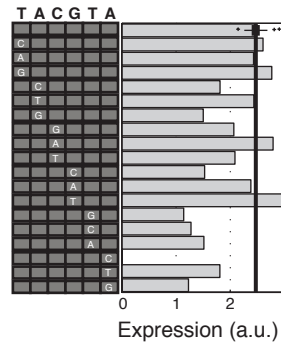

PDC1  
(YLR044C)

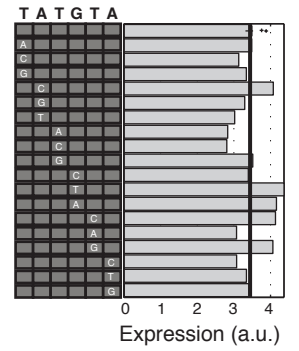

Positioning element (PE)

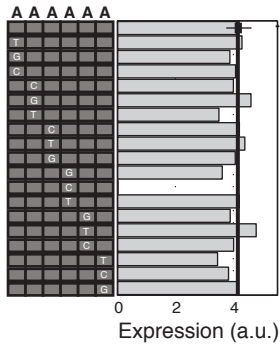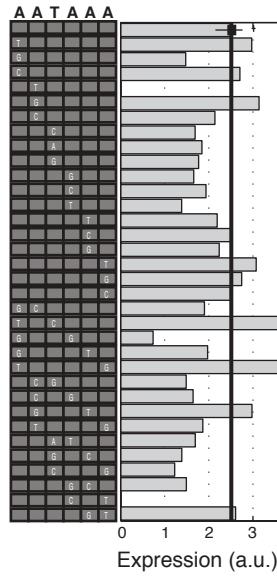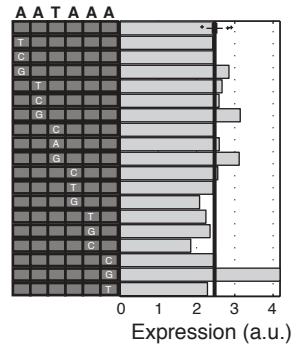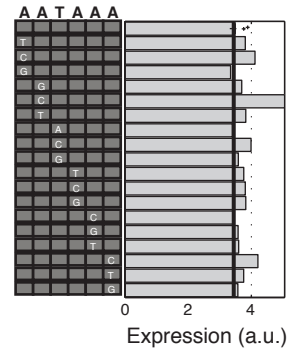

Supplement: pgen.1005147.s011.pdf [file pgen.1005147.s011.pdf]
