# Supplementary material for: Systematic Dissection of the Sequence Determinants of Gene 3’ End Mediated Expression Control
Source: PLoS Genet. 2015 Apr 15;11(4):e1005147. doi: 10.1371/journal.pgen.1005147 (PMC4398552; doi:10.1371/journal.pgen.1005147)
Supplement: S3 Table — Full list of all library sequences with detailed description for each sequence and measured expression values. (XLSX) [file pgen.1005147.s019.xlsx]

## Sheet: SupplementaryTableXX_LibraryDes
Design ID	Lib ID	Expression	Description	Oligo Sequence
1	1	4.9528	SetName|SetName=duplicate barcodes hubs#Context|Name=context_His3Rv43#Element|Name=GuoMCB96Terminator,Type=Terminator,SubType=GuoMCB96Terminator,Strength=Strong,Orientation=plus,Sequence=TATATAACTGTCTAGAAATAAAGAGTATCATCTTTCAAA,Start=30#Barcode|Sequence=AAAAGACCCTG,Start=19,End=29,#Primer5|Sequence=GGGGACCAGGTGCCGTAAG,Start=132,End=150,#Primer3|Sequence=GCGATCCTAGGGCGATCA,Start=1,End=18,	GGGGACCAGGTGCCGTAAGATTACTTTATATAATGTATAATTCATTATGTGATAATGCCAATCGCTTCCGCTAGGTGGCGCTTATATAACTGTCTAGAAATAAAGAGTATCATCTTTCAAAAAAAGACCCTGGCGATCCTAGGGCGATCA
2	2	4.8829	SetName|SetName=duplicate barcodes hubs#Context|Name=context_His3Rv43#Element|Name=GuoMCB96Terminator,Type=Terminator,SubType=GuoMCB96Terminator,Strength=Strong,Orientation=plus,Sequence=TATATAACTGTCTAGAAATAAAGAGTATCATCTTTCAAA,Start=30#Barcode|Sequence=GTCGACTGGTA,Start=19,End=29,#Primer5|Sequence=GGGGACCAGGTGCCGTAAG,Start=132,End=150,#Primer3|Sequence=GCGATCCTAGGGCGATCA,Start=1,End=18,	GGGGACCAGGTGCCGTAAGATTACTTTATATAATGTATAATTCATTATGTGATAATGCCAATCGCTTCCGCTAGGTGGCGCTTATATAACTGTCTAGAAATAAAGAGTATCATCTTTCAAAGTCGACTGGTAGCGATCCTAGGGCGATCA
3	3		SetName|SetName=duplicate barcodes hubs#Context|Name=context_His3Rv43#Element|Name=GuoMCB96Terminator,Type=Terminator,SubType=GuoMCB96Terminator,Strength=Strong,Orientation=plus,Sequence=TATATAACTGTCTAGAAATAAAGAGTATCATCTTTCAAA,Start=30#Barcode|Sequence=GTTAGCTGGGA,Start=19,End=29,#Primer5|Sequence=GGGGACCAGGTGCCGTAAG,Start=132,End=150,#Primer3|Sequence=GCGATCCTAGGGCGATCA,Start=1,End=18,	GGGGACCAGGTGCCGTAAGATTACTTTATATAATGTATAATTCATTATGTGATAATGCCAATCGCTTCCGCTAGGTGGCGCTTATATAACTGTCTAGAAATAAAGAGTATCATCTTTCAAAGTTAGCTGGGAGCGATCCTAGGGCGATCA
4	4	5.0143	SetName|SetName=duplicate barcodes hubs#Context|Name=context_His3Rv43#Element|Name=GuoMCB96Terminator,Type=Terminator,SubType=GuoMCB96Terminator,Strength=Strong,Orientation=plus,Sequence=TATATAACTGTCTAGAAATAAAGAGTATCATCTTTCAAA,Start=30#Barcode|Sequence=AACGCTCTCAA,Start=19,End=29,#Primer5|Sequence=GGGGACCAGGTGCCGTAAG,Start=132,End=150,#Primer3|Sequence=GCGATCCTAGGGCGATCA,Start=1,End=18,	GGGGACCAGGTGCCGTAAGATTACTTTATATAATGTATAATTCATTATGTGATAATGCCAATCGCTTCCGCTAGGTGGCGCTTATATAACTGTCTAGAAATAAAGAGTATCATCTTTCAAAAACGCTCTCAAGCGATCCTAGGGCGATCA
5	5	5.2277	SetName|SetName=duplicate barcodes hubs#Context|Name=context_His3Rv43#Element|Name=GuoMCB96Terminator,Type=Terminator,SubType=GuoMCB96Terminator,Strength=Strong,Orientation=plus,Sequence=TATATAACTGTCTAGAAATAAAGAGTATCATCTTTCAAA,Start=30#Barcode|Sequence=CTTCAGTTCTT,Start=19,End=29,#Primer5|Sequence=GGGGACCAGGTGCCGTAAG,Start=132,End=150,#Primer3|Sequence=GCGATCCTAGGGCGATCA,Start=1,End=18,	GGGGACCAGGTGCCGTAAGATTACTTTATATAATGTATAATTCATTATGTGATAATGCCAATCGCTTCCGCTAGGTGGCGCTTATATAACTGTCTAGAAATAAAGAGTATCATCTTTCAAACTTCAGTTCTTGCGATCCTAGGGCGATCA
6	6	5.0864	SetName|SetName=duplicate barcodes hubs#Context|Name=context_His3Rv43#Element|Name=GuoMCB96Terminator,Type=Terminator,SubType=GuoMCB96Terminator,Strength=Strong,Orientation=plus,Sequence=TATATAACTGTCTAGAAATAAAGAGTATCATCTTTCAAA,Start=30#Barcode|Sequence=AATCGGGCTAT,Start=19,End=29,#Primer5|Sequence=GGGGACCAGGTGCCGTAAG,Start=132,End=150,#Primer3|Sequence=GCGATCCTAGGGCGATCA,Start=1,End=18,	GGGGACCAGGTGCCGTAAGATTACTTTATATAATGTATAATTCATTATGTGATAATGCCAATCGCTTCCGCTAGGTGGCGCTTATATAACTGTCTAGAAATAAAGAGTATCATCTTTCAAAAATCGGGCTATGCGATCCTAGGGCGATCA
7	7	5.41	SetName|SetName=duplicate barcodes hubs#Context|Name=context_His3Rv43#Element|Name=GuoMCB96Terminator,Type=Terminator,SubType=GuoMCB96Terminator,Strength=Strong,Orientation=plus,Sequence=TATATAACTGTCTAGAAATAAAGAGTATCATCTTTCAAA,Start=30#Barcode|Sequence=AAACCTAGAGT,Start=19,End=29,#Primer5|Sequence=GGGGACCAGGTGCCGTAAG,Start=132,End=150,#Primer3|Sequence=GCGATCCTAGGGCGATCA,Start=1,End=18,	GGGGACCAGGTGCCGTAAGATTACTTTATATAATGTATAATTCATTATGTGATAATGCCAATCGCTTCCGCTAGGTGGCGCTTATATAACTGTCTAGAAATAAAGAGTATCATCTTTCAAAAAACCTAGAGTGCGATCCTAGGGCGATCA
8	8	3.9824	SetName|SetName=duplicate barcodes hubs#Context|Name=context_His3Rv43#Element|Name=GuoMCB96Terminator,Type=Terminator,SubType=GuoMCB96Terminator,Strength=Strong,Orientation=plus,Sequence=TATATAACTGTCTAGAAATAAAGAGTATCATCTTTCAAA,Start=30#Barcode|Sequence=GGCGAGCTCTT,Start=19,End=29,#Primer5|Sequence=GGGGACCAGGTGCCGTAAG,Start=132,End=150,#Primer3|Sequence=GCGATCCTAGGGCGATCA,Start=1,End=18,	GGGGACCAGGTGCCGTAAGATTACTTTATATAATGTATAATTCATTATGTGATAATGCCAATCGCTTCCGCTAGGTGGCGCTTATATAACTGTCTAGAAATAAAGAGTATCATCTTTCAAAGGCGAGCTCTTGCGATCCTAGGGCGATCA
9	9	4.9013	SetName|SetName=duplicate barcodes hubs#Context|Name=context_His3Rv43#Element|Name=GuoMCB96Terminator,Type=Terminator,SubType=GuoMCB96Terminator,Strength=Strong,Orientation=plus,Sequence=TATATAACTGTCTAGAAATAAAGAGTATCATCTTTCAAA,Start=30#Barcode|Sequence=TCACTGTCGAC,Start=19,End=29,#Primer5|Sequence=GGGGACCAGGTGCCGTAAG,Start=132,End=150,#Primer3|Sequence=GCGATCCTAGGGCGATCA,Start=1,End=18,	GGGGACCAGGTGCCGTAAGATTACTTTATATAATGTATAATTCATTATGTGATAATGCCAATCGCTTCCGCTAGGTGGCGCTTATATAACTGTCTAGAAATAAAGAGTATCATCTTTCAAATCACTGTCGACGCGATCCTAGGGCGATCA
10	10		SetName|SetName=duplicate barcodes hubs#Context|Name=context_His3Rv43#Element|Name=GuoMCB96Terminator,Type=Terminator,SubType=GuoMCB96Terminator,Strength=Strong,Orientation=plus,Sequence=TATATAACTGTCTAGAAATAAAGAGTATCATCTTTCAAA,Start=30#Barcode|Sequence=AGTTTTACGAT,Start=19,End=29,#Primer5|Sequence=GGGGACCAGGTGCCGTAAG,Start=132,End=150,#Primer3|Sequence=GCGATCCTAGGGCGATCA,Start=1,End=18,	GGGGACCAGGTGCCGTAAGATTACTTTATATAATGTATAATTCATTATGTGATAATGCCAATCGCTTCCGCTAGGTGGCGCTTATATAACTGTCTAGAAATAAAGAGTATCATCTTTCAAAAGTTTTACGATGCGATCCTAGGGCGATCA
11	11	4.7064	SetName|SetName=duplicate barcodes hubs#Context|Name=context_His3Rv43AfterTerm#Element|Name=GuoMCB96Terminator,Type=Terminator,SubType=GuoMCB96Terminator,Strength=Strong,Orientation=plus,Sequence=TATATAACTGTCTAGAAATAAAGAGTATCATCTTTCAAA,Start=93#Barcode|Sequence=CCAGTTTTGTA,Start=19,End=29,#Primer5|Sequence=GGGGACCAGGTGCCGTAAG,Start=132,End=150,#Primer3|Sequence=GCGATCCTAGGGCGATCA,Start=1,End=18,	GGGGACCAGGTGCCGTAAGTATATAACTGTCTAGAAATAAAGAGTATCATCTTTCAAAATTACTTTATATAATGTATAATTCATTATGTGATAATGCCAATCGCTTCCGCTAGGTGGCGCTCCAGTTTTGTAGCGATCCTAGGGCGATCA
12	12	4.3334	SetName|SetName=duplicate barcodes hubs#Context|Name=context_His3Rv43AfterTerm#Element|Name=GuoMCB96Terminator,Type=Terminator,SubType=GuoMCB96Terminator,Strength=Strong,Orientation=plus,Sequence=TATATAACTGTCTAGAAATAAAGAGTATCATCTTTCAAA,Start=93#Barcode|Sequence=CACGAGTTTGT,Start=19,End=29,#Primer5|Sequence=GGGGACCAGGTGCCGTAAG,Start=132,End=150,#Primer3|Sequence=GCGATCCTAGGGCGATCA,Start=1,End=18,	GGGGACCAGGTGCCGTAAGTATATAACTGTCTAGAAATAAAGAGTATCATCTTTCAAAATTACTTTATATAATGTATAATTCATTATGTGATAATGCCAATCGCTTCCGCTAGGTGGCGCTCACGAGTTTGTGCGATCCTAGGGCGATCA
13	13	4.7458	SetName|SetName=duplicate barcodes hubs#Context|Name=context_His3Rv43AfterTerm#Element|Name=GuoMCB96Terminator,Type=Terminator,SubType=GuoMCB96Terminator,Strength=Strong,Orientation=plus,Sequence=TATATAACTGTCTAGAAATAAAGAGTATCATCTTTCAAA,Start=93#Barcode|Sequence=ATACCCGCTGT,Start=19,End=29,#Primer5|Sequence=GGGGACCAGGTGCCGTAAG,Start=132,End=150,#Primer3|Sequence=GCGATCCTAGGGCGATCA,Start=1,End=18,	GGGGACCAGGTGCCGTAAGTATATAACTGTCTAGAAATAAAGAGTATCATCTTTCAAAATTACTTTATATAATGTATAATTCATTATGTGATAATGCCAATCGCTTCCGCTAGGTGGCGCTATACCCGCTGTGCGATCCTAGGGCGATCA
14	14	4.4906	SetName|SetName=duplicate barcodes hubs#Context|Name=context_His3Rv43AfterTerm#Element|Name=GuoMCB96Terminator,Type=Terminator,SubType=GuoMCB96Terminator,Strength=Strong,Orientation=plus,Sequence=TATATAACTGTCTAGAAATAAAGAGTATCATCTTTCAAA,Start=93#Barcode|Sequence=CTCCTACGGTC,Start=19,End=29,#Primer5|Sequence=GGGGACCAGGTGCCGTAAG,Start=132,End=150,#Primer3|Sequence=GCGATCCTAGGGCGATCA,Start=1,End=18,	GGGGACCAGGTGCCGTAAGTATATAACTGTCTAGAAATAAAGAGTATCATCTTTCAAAATTACTTTATATAATGTATAATTCATTATGTGATAATGCCAATCGCTTCCGCTAGGTGGCGCTCTCCTACGGTCGCGATCCTAGGGCGATCA
15	15		SetName|SetName=duplicate barcodes hubs#Context|Name=context_His3Rv43AfterTerm#Element|Name=GuoMCB96Terminator,Type=Terminator,SubType=GuoMCB96Terminator,Strength=Strong,Orientation=plus,Sequence=TATATAACTGTCTAGAAATAAAGAGTATCATCTTTCAAA,Start=93#Barcode|Sequence=GGATCGTCAAT,Start=19,End=29,#Primer5|Sequence=GGGGACCAGGTGCCGTAAG,Start=132,End=150,#Primer3|Sequence=GCGATCCTAGGGCGATCA,Start=1,End=18,	GGGGACCAGGTGCCGTAAGTATATAACTGTCTAGAAATAAAGAGTATCATCTTTCAAAATTACTTTATATAATGTATAATTCATTATGTGATAATGCCAATCGCTTCCGCTAGGTGGCGCTGGATCGTCAATGCGATCCTAGGGCGATCA
16	16	4.4787	SetName|SetName=duplicate barcodes hubs#Context|Name=context_His3Rv43AfterTerm#Element|Name=GuoMCB96Terminator,Type=Terminator,SubType=GuoMCB96Terminator,Strength=Strong,Orientation=plus,Sequence=TATATAACTGTCTAGAAATAAAGAGTATCATCTTTCAAA,Start=93#Barcode|Sequence=CCAGTGTGGAC,Start=19,End=29,#Primer5|Sequence=GGGGACCAGGTGCCGTAAG,Start=132,End=150,#Primer3|Sequence=GCGATCCTAGGGCGATCA,Start=1,End=18,	GGGGACCAGGTGCCGTAAGTATATAACTGTCTAGAAATAAAGAGTATCATCTTTCAAAATTACTTTATATAATGTATAATTCATTATGTGATAATGCCAATCGCTTCCGCTAGGTGGCGCTCCAGTGTGGACGCGATCCTAGGGCGATCA
17	17	4.5808	SetName|SetName=duplicate barcodes hubs#Context|Name=context_His3Rv43AfterTerm#Element|Name=GuoMCB96Terminator,Type=Terminator,SubType=GuoMCB96Terminator,Strength=Strong,Orientation=plus,Sequence=TATATAACTGTCTAGAAATAAAGAGTATCATCTTTCAAA,Start=93#Barcode|Sequence=GTCGCTGGATT,Start=19,End=29,#Primer5|Sequence=GGGGACCAGGTGCCGTAAG,Start=132,End=150,#Primer3|Sequence=GCGATCCTAGGGCGATCA,Start=1,End=18,	GGGGACCAGGTGCCGTAAGTATATAACTGTCTAGAAATAAAGAGTATCATCTTTCAAAATTACTTTATATAATGTATAATTCATTATGTGATAATGCCAATCGCTTCCGCTAGGTGGCGCTGTCGCTGGATTGCGATCCTAGGGCGATCA
18	18	4.7405	SetName|SetName=duplicate barcodes hubs#Context|Name=context_His3Rv43AfterTerm#Element|Name=GuoMCB96Terminator,Type=Terminator,SubType=GuoMCB96Terminator,Strength=Strong,Orientation=plus,Sequence=TATATAACTGTCTAGAAATAAAGAGTATCATCTTTCAAA,Start=93#Barcode|Sequence=AAGACTAACTG,Start=19,End=29,#Primer5|Sequence=GGGGACCAGGTGCCGTAAG,Start=132,End=150,#Primer3|Sequence=GCGATCCTAGGGCGATCA,Start=1,End=18,	GGGGACCAGGTGCCGTAAGTATATAACTGTCTAGAAATAAAGAGTATCATCTTTCAAAATTACTTTATATAATGTATAATTCATTATGTGATAATGCCAATCGCTTCCGCTAGGTGGCGCTAAGACTAACTGGCGATCCTAGGGCGATCA
19	19	4.6623	SetName|SetName=duplicate barcodes hubs#Context|Name=context_His3Rv43AfterTerm#Element|Name=GuoMCB96Terminator,Type=Terminator,SubType=GuoMCB96Terminator,Strength=Strong,Orientation=plus,Sequence=TATATAACTGTCTAGAAATAAAGAGTATCATCTTTCAAA,Start=93#Barcode|Sequence=TTAGCGGCAAT,Start=19,End=29,#Primer5|Sequence=GGGGACCAGGTGCCGTAAG,Start=132,End=150,#Primer3|Sequence=GCGATCCTAGGGCGATCA,Start=1,End=18,	GGGGACCAGGTGCCGTAAGTATATAACTGTCTAGAAATAAAGAGTATCATCTTTCAAAATTACTTTATATAATGTATAATTCATTATGTGATAATGCCAATCGCTTCCGCTAGGTGGCGCTTTAGCGGCAATGCGATCCTAGGGCGATCA
20	20	4.6834	SetName|SetName=duplicate barcodes hubs#Context|Name=context_His3Rv43AfterTerm#Element|Name=GuoMCB96Terminator,Type=Terminator,SubType=GuoMCB96Terminator,Strength=Strong,Orientation=plus,Sequence=TATATAACTGTCTAGAAATAAAGAGTATCATCTTTCAAA,Start=93#Barcode|Sequence=ATTACCGGTCA,Start=19,End=29,#Primer5|Sequence=GGGGACCAGGTGCCGTAAG,Start=132,End=150,#Primer3|Sequence=GCGATCCTAGGGCGATCA,Start=1,End=18,	GGGGACCAGGTGCCGTAAGTATATAACTGTCTAGAAATAAAGAGTATCATCTTTCAAAATTACTTTATATAATGTATAATTCATTATGTGATAATGCCAATCGCTTCCGCTAGGTGGCGCTATTACCGGTCAGCGATCCTAGGGCGATCA
21	21	4.9418	SetName|SetName=duplicate barcodes hubs#Context|Name=context_His3Rv43#Element|Name=GuoMCB96Terminator,Type=Terminator,SubType=GuoMCB96Terminator,Strength=Strong,Orientation=plus,Sequence=TATATAACTGTCTAGAAATAAAGAGTATCATCTTTCAAA,Start=30#Element|Name=GAL4_S_m,Type=TF,SubType=GAL4,Strength=Strong,Orientation=minus,Sequence=CGGAGGAGAGTCTTCCG,Start=69#Element|Name=His3Rv43,Type=Promotert,SubType=His3R…	GGGGACCAGGTGCCGTAAGATTACTTTATATAATGTATAATTCATTATGTGATAATGCCAATCGCCGGAGGAGAGTCTTCCGTATATAACTGTCTAGAAATAAAGAGTATCATCTTTCAAAATACGCCAACTGCGATCCTAGGGCGATCA
22	22	4.9867	SetName|SetName=duplicate barcodes hubs#Context|Name=context_His3Rv43#Element|Name=GuoMCB96Terminator,Type=Terminator,SubType=GuoMCB96Terminator,Strength=Strong,Orientation=plus,Sequence=TATATAACTGTCTAGAAATAAAGAGTATCATCTTTCAAA,Start=30#Element|Name=GAL4_S_m,Type=TF,SubType=GAL4,Strength=Strong,Orientation=minus,Sequence=CGGAGGAGAGTCTTCCG,Start=69#Element|Name=His3Rv43,Type=Promotert,SubType=His3R…	GGGGACCAGGTGCCGTAAGATTACTTTATATAATGTATAATTCATTATGTGATAATGCCAATCGCCGGAGGAGAGTCTTCCGTATATAACTGTCTAGAAATAAAGAGTATCATCTTTCAAACCAGTAAAGATGCGATCCTAGGGCGATCA
23	23	5.1526	SetName|SetName=duplicate barcodes hubs#Context|Name=context_His3Rv43#Element|Name=GuoMCB96Terminator,Type=Terminator,SubType=GuoMCB96Terminator,Strength=Strong,Orientation=plus,Sequence=TATATAACTGTCTAGAAATAAAGAGTATCATCTTTCAAA,Start=30#Element|Name=GAL4_S_m,Type=TF,SubType=GAL4,Strength=Strong,Orientation=minus,Sequence=CGGAGGAGAGTCTTCCG,Start=69#Element|Name=His3Rv43,Type=Promotert,SubType=His3R…	GGGGACCAGGTGCCGTAAGATTACTTTATATAATGTATAATTCATTATGTGATAATGCCAATCGCCGGAGGAGAGTCTTCCGTATATAACTGTCTAGAAATAAAGAGTATCATCTTTCAAAGTTACTGTCATGCGATCCTAGGGCGATCA
24	24	4.9582	SetName|SetName=duplicate barcodes hubs#Context|Name=context_His3Rv43#Element|Name=GuoMCB96Terminator,Type=Terminator,SubType=GuoMCB96Terminator,Strength=Strong,Orientation=plus,Sequence=TATATAACTGTCTAGAAATAAAGAGTATCATCTTTCAAA,Start=30#Element|Name=GAL4_S_m,Type=TF,SubType=GAL4,Strength=Strong,Orientation=minus,Sequence=CGGAGGAGAGTCTTCCG,Start=69#Element|Name=His3Rv43,Type=Promotert,SubType=His3R…	GGGGACCAGGTGCCGTAAGATTACTTTATATAATGTATAATTCATTATGTGATAATGCCAATCGCCGGAGGAGAGTCTTCCGTATATAACTGTCTAGAAATAAAGAGTATCATCTTTCAAAGTTAGGTCTGAGCGATCCTAGGGCGATCA
25	25	4.9643	SetName|SetName=duplicate barcodes hubs#Context|Name=context_His3Rv43#Element|Name=GuoMCB96Terminator,Type=Terminator,SubType=GuoMCB96Terminator,Strength=Strong,Orientation=plus,Sequence=TATATAACTGTCTAGAAATAAAGAGTATCATCTTTCAAA,Start=30#Element|Name=GAL4_S_m,Type=TF,SubType=GAL4,Strength=Strong,Orientation=minus,Sequence=CGGAGGAGAGTCTTCCG,Start=69#Element|Name=His3Rv43,Type=Promotert,SubType=His3R…	GGGGACCAGGTGCCGTAAGATTACTTTATATAATGTATAATTCATTATGTGATAATGCCAATCGCCGGAGGAGAGTCTTCCGTATATAACTGTCTAGAAATAAAGAGTATCATCTTTCAAACATGGTCAATGGCGATCCTAGGGCGATCA
26	26	4.9232	SetName|SetName=duplicate barcodes hubs#Context|Name=context_His3Rv43#Element|Name=GuoMCB96Terminator,Type=Terminator,SubType=GuoMCB96Terminator,Strength=Strong,Orientation=plus,Sequence=TATATAACTGTCTAGAAATAAAGAGTATCATCTTTCAAA,Start=30#Element|Name=GAL4_S_m,Type=TF,SubType=GAL4,Strength=Strong,Orientation=minus,Sequence=CGGAGGAGAGTCTTCCG,Start=69#Element|Name=His3Rv43,Type=Promotert,SubType=His3R…	GGGGACCAGGTGCCGTAAGATTACTTTATATAATGTATAATTCATTATGTGATAATGCCAATCGCCGGAGGAGAGTCTTCCGTATATAACTGTCTAGAAATAAAGAGTATCATCTTTCAAACCATATGCAATGCGATCCTAGGGCGATCA
27	27	4.7197	SetName|SetName=duplicate barcodes hubs#Context|Name=context_His3Rv43#Element|Name=GuoMCB96Terminator,Type=Terminator,SubType=GuoMCB96Terminator,Strength=Strong,Orientation=plus,Sequence=TATATAACTGTCTAGAAATAAAGAGTATCATCTTTCAAA,Start=30#Element|Name=GAL4_S_m,Type=TF,SubType=GAL4,Strength=Strong,Orientation=minus,Sequence=CGGAGGAGAGTCTTCCG,Start=69#Element|Name=His3Rv43,Type=Promotert,SubType=His3R…	GGGGACCAGGTGCCGTAAGATTACTTTATATAATGTATAATTCATTATGTGATAATGCCAATCGCCGGAGGAGAGTCTTCCGTATATAACTGTCTAGAAATAAAGAGTATCATCTTTCAAAGGGTATTGCAAGCGATCCTAGGGCGATCA
28	28	4.9928	SetName|SetName=duplicate barcodes hubs#Context|Name=context_His3Rv43#Element|Name=GuoMCB96Terminator,Type=Terminator,SubType=GuoMCB96Terminator,Strength=Strong,Orientation=plus,Sequence=TATATAACTGTCTAGAAATAAAGAGTATCATCTTTCAAA,Start=30#Element|Name=GAL4_S_m,Type=TF,SubType=GAL4,Strength=Strong,Orientation=minus,Sequence=CGGAGGAGAGTCTTCCG,Start=69#Element|Name=His3Rv43,Type=Promotert,SubType=His3R…	GGGGACCAGGTGCCGTAAGATTACTTTATATAATGTATAATTCATTATGTGATAATGCCAATCGCCGGAGGAGAGTCTTCCGTATATAACTGTCTAGAAATAAAGAGTATCATCTTTCAAACAACGTAGTGAGCGATCCTAGGGCGATCA
29	29	4.9204	SetName|SetName=duplicate barcodes hubs#Context|Name=context_His3Rv43#Element|Name=GuoMCB96Terminator,Type=Terminator,SubType=GuoMCB96Terminator,Strength=Strong,Orientation=plus,Sequence=TATATAACTGTCTAGAAATAAAGAGTATCATCTTTCAAA,Start=30#Element|Name=GAL4_S_m,Type=TF,SubType=GAL4,Strength=Strong,Orientation=minus,Sequence=CGGAGGAGAGTCTTCCG,Start=69#Element|Name=His3Rv43,Type=Promotert,SubType=His3R…	GGGGACCAGGTGCCGTAAGATTACTTTATATAATGTATAATTCATTATGTGATAATGCCAATCGCCGGAGGAGAGTCTTCCGTATATAACTGTCTAGAAATAAAGAGTATCATCTTTCAAAGACTGTAGCAAGCGATCCTAGGGCGATCA
30	30	5.4262	SetName|SetName=duplicate barcodes hubs#Context|Name=context_His3Rv43#Element|Name=GuoMCB96Terminator,Type=Terminator,SubType=GuoMCB96Terminator,Strength=Strong,Orientation=plus,Sequence=TATATAACTGTCTAGAAATAAAGAGTATCATCTTTCAAA,Start=30#Element|Name=GAL4_S_m,Type=TF,SubType=GAL4,Strength=Strong,Orientation=minus,Sequence=CGGAGGAGAGTCTTCCG,Start=69#Element|Name=His3Rv43,Type=Promotert,SubType=His3R…	GGGGACCAGGTGCCGTAAGATTACTTTATATAATGTATAATTCATTATGTGATAATGCCAATCGCCGGAGGAGAGTCTTCCGTATATAACTGTCTAGAAATAAAGAGTATCATCTTTCAAAATGTCTATTTGGCGATCCTAGGGCGATCA
31	31	5.4731	SetName|SetName=duplicate barcodes hubs#Context|Name=context_His3Rv43#Element|Name=GuoMCB96Terminator,Type=Terminator,SubType=GuoMCB96Terminator,Strength=Strong,Orientation=plus,Sequence=TATATAACTGTCTAGAAATAAAGAGTATCATCTTTCAAA,Start=30#Element|Name=GAL4_S_m,Type=TF,SubType=GAL4,Strength=Strong,Orientation=minus,Sequence=CGGAGGAGAGTCTTCCG,Start=69#Element|Name=His3Rv43,Type=Promotert,SubType=His3R…	GGGGACCAGGTGCCGTAAGATTACTTTATATAATGTATAATTCATTATGTGATAATGCCAATCGCCGGAGGAGAGTCTTCCGTATATAACTGTCTAGAAATAAAGAGTATCATCTTTCAAAAGGTGCATGTAGCGATCCTAGGGCGATCA
32	32	4.4736	SetName|SetName=duplicate barcodes hubs#Context|Name=context_His3Rv43#Element|Name=GuoMCB96Terminator,Type=Terminator,SubType=GuoMCB96Terminator,Strength=Strong,Orientation=plus,Sequence=TATATAACTGTCTAGAAATAAAGAGTATCATCTTTCAAA,Start=30#Element|Name=GAL4_W_m,Type=TF,SubType=GAL4,Strength=Weak,Orientation=minus,Sequence=CGGAGCAGTGCGGCGCG,Start=69#Element|Name=His3Rv43,Type=Promotert,SubType=His3Rv4…	GGGGACCAGGTGCCGTAAGATTACTTTATATAATGTATAATTCATTATGTGATAATGCCAATCGCCGGAGCAGTGCGGCGCGTATATAACTGTCTAGAAATAAAGAGTATCATCTTTCAAAGTCCGATACATGCGATCCTAGGGCGATCA
33	33	4.7847	SetName|SetName=duplicate barcodes hubs#Context|Name=context_His3Rv43#Element|Name=GuoMCB96Terminator,Type=Terminator,SubType=GuoMCB96Terminator,Strength=Strong,Orientation=plus,Sequence=TATATAACTGTCTAGAAATAAAGAGTATCATCTTTCAAA,Start=30#Element|Name=GAL4_W_m,Type=TF,SubType=GAL4,Strength=Weak,Orientation=minus,Sequence=CGGAGCAGTGCGGCGCG,Start=69#Element|Name=His3Rv43,Type=Promotert,SubType=His3Rv4…	GGGGACCAGGTGCCGTAAGATTACTTTATATAATGTATAATTCATTATGTGATAATGCCAATCGCCGGAGCAGTGCGGCGCGTATATAACTGTCTAGAAATAAAGAGTATCATCTTTCAAACTGGATATTTCGCGATCCTAGGGCGATCA
34	34	4.8243	SetName|SetName=duplicate barcodes hubs#Context|Name=context_His3Rv43#Element|Name=GuoMCB96Terminator,Type=Terminator,SubType=GuoMCB96Terminator,Strength=Strong,Orientation=plus,Sequence=TATATAACTGTCTAGAAATAAAGAGTATCATCTTTCAAA,Start=30#Element|Name=GAL4_W_m,Type=TF,SubType=GAL4,Strength=Weak,Orientation=minus,Sequence=CGGAGCAGTGCGGCGCG,Start=69#Element|Name=His3Rv43,Type=Promotert,SubType=His3Rv4…	GGGGACCAGGTGCCGTAAGATTACTTTATATAATGTATAATTCATTATGTGATAATGCCAATCGCCGGAGCAGTGCGGCGCGTATATAACTGTCTAGAAATAAAGAGTATCATCTTTCAAAAACAATTCTTGGCGATCCTAGGGCGATCA
35	35	4.6523	SetName|SetName=duplicate barcodes hubs#Context|Name=context_His3Rv43#Element|Name=GuoMCB96Terminator,Type=Terminator,SubType=GuoMCB96Terminator,Strength=Strong,Orientation=plus,Sequence=TATATAACTGTCTAGAAATAAAGAGTATCATCTTTCAAA,Start=30#Element|Name=GAL4_W_m,Type=TF,SubType=GAL4,Strength=Weak,Orientation=minus,Sequence=CGGAGCAGTGCGGCGCG,Start=69#Element|Name=His3Rv43,Type=Promotert,SubType=His3Rv4…	GGGGACCAGGTGCCGTAAGATTACTTTATATAATGTATAATTCATTATGTGATAATGCCAATCGCCGGAGCAGTGCGGCGCGTATATAACTGTCTAGAAATAAAGAGTATCATCTTTCAAACTTCGGTGTCGGCGATCCTAGGGCGATCA
36	36	4.0564	SetName|SetName=duplicate barcodes hubs#Context|Name=context_His3Rv43#Element|Name=GuoMCB96Terminator,Type=Terminator,SubType=GuoMCB96Terminator,Strength=Strong,Orientation=plus,Sequence=TATATAACTGTCTAGAAATAAAGAGTATCATCTTTCAAA,Start=30#Element|Name=GAL4_W_m,Type=TF,SubType=GAL4,Strength=Weak,Orientation=minus,Sequence=CGGAGCAGTGCGGCGCG,Start=69#Element|Name=His3Rv43,Type=Promotert,SubType=His3Rv4…	GGGGACCAGGTGCCGTAAGATTACTTTATATAATGTATAATTCATTATGTGATAATGCCAATCGCCGGAGCAGTGCGGCGCGTATATAACTGTCTAGAAATAAAGAGTATCATCTTTCAAAGGCCAAACGCCGCGATCCTAGGGCGATCA
37	37	4.9106	SetName|SetName=duplicate barcodes hubs#Context|Name=context_His3Rv43#Element|Name=GuoMCB96Terminator,Type=Terminator,SubType=GuoMCB96Terminator,Strength=Strong,Orientation=plus,Sequence=TATATAACTGTCTAGAAATAAAGAGTATCATCTTTCAAA,Start=30#Element|Name=GAL4_W_m,Type=TF,SubType=GAL4,Strength=Weak,Orientation=minus,Sequence=CGGAGCAGTGCGGCGCG,Start=69#Element|Name=His3Rv43,Type=Promotert,SubType=His3Rv4…	GGGGACCAGGTGCCGTAAGATTACTTTATATAATGTATAATTCATTATGTGATAATGCCAATCGCCGGAGCAGTGCGGCGCGTATATAACTGTCTAGAAATAAAGAGTATCATCTTTCAAACGTACCACTCCGCGATCCTAGGGCGATCA
38	38	4.2222	SetName|SetName=duplicate barcodes hubs#Context|Name=context_His3Rv43#Element|Name=GuoMCB96Terminator,Type=Terminator,SubType=GuoMCB96Terminator,Strength=Strong,Orientation=plus,Sequence=TATATAACTGTCTAGAAATAAAGAGTATCATCTTTCAAA,Start=30#Element|Name=GAL4_W_m,Type=TF,SubType=GAL4,Strength=Weak,Orientation=minus,Sequence=CGGAGCAGTGCGGCGCG,Start=69#Element|Name=His3Rv43,Type=Promotert,SubType=His3Rv4…	GGGGACCAGGTGCCGTAAGATTACTTTATATAATGTATAATTCATTATGTGATAATGCCAATCGCCGGAGCAGTGCGGCGCGTATATAACTGTCTAGAAATAAAGAGTATCATCTTTCAAATGGACTTAGCCGCGATCCTAGGGCGATCA
39	39	4.162	SetName|SetName=duplicate barcodes hubs#Context|Name=context_His3Rv43#Element|Name=GuoMCB96Terminator,Type=Terminator,SubType=GuoMCB96Terminator,Strength=Strong,Orientation=plus,Sequence=TATATAACTGTCTAGAAATAAAGAGTATCATCTTTCAAA,Start=30#Element|Name=GAL4_W_m,Type=TF,SubType=GAL4,Strength=Weak,Orientation=minus,Sequence=CGGAGCAGTGCGGCGCG,Start=69#Element|Name=His3Rv43,Type=Promotert,SubType=His3Rv4…	GGGGACCAGGTGCCGTAAGATTACTTTATATAATGTATAATTCATTATGTGATAATGCCAATCGCCGGAGCAGTGCGGCGCGTATATAACTGTCTAGAAATAAAGAGTATCATCTTTCAAACTGGACTCGTAGCGATCCTAGGGCGATCA
40	40	4.6019	SetName|SetName=duplicate barcodes hubs#Context|Name=context_His3Rv43#Element|Name=GuoMCB96Terminator,Type=Terminator,SubType=GuoMCB96Terminator,Strength=Strong,Orientation=plus,Sequence=TATATAACTGTCTAGAAATAAAGAGTATCATCTTTCAAA,Start=30#Element|Name=GAL4_W_m,Type=TF,SubType=GAL4,Strength=Weak,Orientation=minus,Sequence=CGGAGCAGTGCGGCGCG,Start=69#Element|Name=His3Rv43,Type=Promotert,SubType=His3Rv4…	GGGGACCAGGTGCCGTAAGATTACTTTATATAATGTATAATTCATTATGTGATAATGCCAATCGCCGGAGCAGTGCGGCGCGTATATAACTGTCTAGAAATAAAGAGTATCATCTTTCAAATCATAGCGCGTGCGATCCTAGGGCGATCA
41	41	4.4349	SetName|SetName=duplicate barcodes hubs#Context|Name=context_His3Rv43#Element|Name=GuoMCB96Terminator,Type=Terminator,SubType=GuoMCB96Terminator,Strength=Strong,Orientation=plus,Sequence=TATATAACTGTCTAGAAATAAAGAGTATCATCTTTCAAA,Start=30#Element|Name=GAL4_W_m,Type=TF,SubType=GAL4,Strength=Weak,Orientation=minus,Sequence=CGGAGCAGTGCGGCGCG,Start=69#Element|Name=His3Rv43,Type=Promotert,SubType=His3Rv4…	GGGGACCAGGTGCCGTAAGATTACTTTATATAATGTATAATTCATTATGTGATAATGCCAATCGCCGGAGCAGTGCGGCGCGTATATAACTGTCTAGAAATAAAGAGTATCATCTTTCAAAAGGACAAGCACGCGATCCTAGGGCGATCA
42	42	4.5198	SetName|SetName=duplicate barcodes hubs#Context|Name=context_His3Rv43AfterTerm#Element|Name=GAL4_S_m,Type=TF,SubType=GAL4,Strength=Strong,Orientation=minus,Sequence=CGGAGGAGAGTCTTCCG,Start=30#Element|Name=His3Rv43,Type=Promotert,SubType=His3Rv43,Strength=Strong,Orientation=minus,Sequence=ATTACTTTATATAATGTATAATTCATTATGTGATAATGCCAAT,Start=50#Element|Name=GuoMCB96Terminator,Type=Terminator,SubType=G…	GGGGACCAGGTGCCGTAAGTATATAACTGTCTAGAAATAAAGAGTATCATCTTTCAAAATTACTTTATATAATGTATAATTCATTATGTGATAATGCCAATCGCCGGAGGAGAGTCTTCCGACTTACAGAGTGCGATCCTAGGGCGATCA
43	43	4.6532	SetName|SetName=duplicate barcodes hubs#Context|Name=context_His3Rv43AfterTerm#Element|Name=GAL4_W_m,Type=TF,SubType=GAL4,Strength=Weak,Orientation=minus,Sequence=CGGAGCAGTGCGGCGCG,Start=30#Element|Name=His3Rv43,Type=Promotert,SubType=His3Rv43,Strength=Strong,Orientation=minus,Sequence=ATTACTTTATATAATGTATAATTCATTATGTGATAATGCCAAT,Start=50#Element|Name=GuoMCB96Terminator,Type=Terminator,SubType=Guo…	GGGGACCAGGTGCCGTAAGTATATAACTGTCTAGAAATAAAGAGTATCATCTTTCAAAATTACTTTATATAATGTATAATTCATTATGTGATAATGCCAATCGCCGGAGCAGTGCGGCGCGAACAAAGAGATGCGATCCTAGGGCGATCA
44	44		SetName|SetName=duplicate barcodes hubs#Context|Name=context_His3Rv43AfterTerm#Element|Name=GAL4_S_m,Type=TF,SubType=GAL4,Strength=Strong,Orientation=minus,Sequence=CGGAGGAGAGTCTTCCG,Start=30#Element|Name=His3Rv43,Type=Promotert,SubType=His3Rv43,Strength=Strong,Orientation=minus,Sequence=ATTACTTTATATAATGTATAATTCATTATGTGATAATGCCAAT,Start=50#Element|Name=GuoMCB96Terminator,Type=Terminator,SubType=G…	GGGGACCAGGTGCCGTAAGTATATAACTGTCTAGAAATAAAGAGTATCATCTTTCAAAATTACTTTATATAATGTATAATTCATTATGTGATAATGCCAATCGCCGGAGGAGAGTCTTCCGCGAGAGTTTGAGCGATCCTAGGGCGATCA
45	45	4.7324	SetName|SetName=duplicate barcodes hubs#Context|Name=context_His3Rv43AfterTerm#Element|Name=GAL4_W_m,Type=TF,SubType=GAL4,Strength=Weak,Orientation=minus,Sequence=CGGAGCAGTGCGGCGCG,Start=30#Element|Name=His3Rv43,Type=Promotert,SubType=His3Rv43,Strength=Strong,Orientation=minus,Sequence=ATTACTTTATATAATGTATAATTCATTATGTGATAATGCCAAT,Start=50#Element|Name=GuoMCB96Terminator,Type=Terminator,SubType=Guo…	GGGGACCAGGTGCCGTAAGTATATAACTGTCTAGAAATAAAGAGTATCATCTTTCAAAATTACTTTATATAATGTATAATTCATTATGTGATAATGCCAATCGCCGGAGCAGTGCGGCGCGATGAGTCGAATGCGATCCTAGGGCGATCA
46	46	4.5519	SetName|SetName=duplicate barcodes hubs#Context|Name=context_His3Rv43AfterTerm#Element|Name=GAL4_S_m,Type=TF,SubType=GAL4,Strength=Strong,Orientation=minus,Sequence=CGGAGGAGAGTCTTCCG,Start=30#Element|Name=His3Rv43,Type=Promotert,SubType=His3Rv43,Strength=Strong,Orientation=minus,Sequence=ATTACTTTATATAATGTATAATTCATTATGTGATAATGCCAAT,Start=50#Element|Name=GuoMCB96Terminator,Type=Terminator,SubType=G…	GGGGACCAGGTGCCGTAAGTATATAACTGTCTAGAAATAAAGAGTATCATCTTTCAAAATTACTTTATATAATGTATAATTCATTATGTGATAATGCCAATCGCCGGAGGAGAGTCTTCCGCGAATCGTTCAGCGATCCTAGGGCGATCA
47	47	4.2691	SetName|SetName=duplicate barcodes hubs#Context|Name=context_His3Rv43AfterTerm#Element|Name=GAL4_W_m,Type=TF,SubType=GAL4,Strength=Weak,Orientation=minus,Sequence=CGGAGCAGTGCGGCGCG,Start=30#Element|Name=His3Rv43,Type=Promotert,SubType=His3Rv43,Strength=Strong,Orientation=minus,Sequence=ATTACTTTATATAATGTATAATTCATTATGTGATAATGCCAAT,Start=50#Element|Name=GuoMCB96Terminator,Type=Terminator,SubType=Guo…	GGGGACCAGGTGCCGTAAGTATATAACTGTCTAGAAATAAAGAGTATCATCTTTCAAAATTACTTTATATAATGTATAATTCATTATGTGATAATGCCAATCGCCGGAGCAGTGCGGCGCGGTAGTATCCAAGCGATCCTAGGGCGATCA
48	48	4.4031	SetName|SetName=duplicate barcodes hubs#Context|Name=context_His3Rv43AfterTerm#Element|Name=GAL4_S_m,Type=TF,SubType=GAL4,Strength=Strong,Orientation=minus,Sequence=CGGAGGAGAGTCTTCCG,Start=30#Element|Name=His3Rv43,Type=Promotert,SubType=His3Rv43,Strength=Strong,Orientation=minus,Sequence=ATTACTTTATATAATGTATAATTCATTATGTGATAATGCCAAT,Start=50#Element|Name=GuoMCB96Terminator,Type=Terminator,SubType=G…	GGGGACCAGGTGCCGTAAGTATATAACTGTCTAGAAATAAAGAGTATCATCTTTCAAAATTACTTTATATAATGTATAATTCATTATGTGATAATGCCAATCGCCGGAGGAGAGTCTTCCGAATGAGTTGGAGCGATCCTAGGGCGATCA
49	49	5.0154	SetName|SetName=duplicate barcodes hubs#Context|Name=context_His3Rv43AfterTerm#Element|Name=GAL4_W_m,Type=TF,SubType=GAL4,Strength=Weak,Orientation=minus,Sequence=CGGAGCAGTGCGGCGCG,Start=30#Element|Name=His3Rv43,Type=Promotert,SubType=His3Rv43,Strength=Strong,Orientation=minus,Sequence=ATTACTTTATATAATGTATAATTCATTATGTGATAATGCCAAT,Start=50#Element|Name=GuoMCB96Terminator,Type=Terminator,SubType=Guo…	GGGGACCAGGTGCCGTAAGTATATAACTGTCTAGAAATAAAGAGTATCATCTTTCAAAATTACTTTATATAATGTATAATTCATTATGTGATAATGCCAATCGCCGGAGCAGTGCGGCGCGTAGTAAGGCCAGCGATCCTAGGGCGATCA
50	50	4.4984	SetName|SetName=duplicate barcodes hubs#Context|Name=context_His3Rv43AfterTerm#Element|Name=GAL4_S_m,Type=TF,SubType=GAL4,Strength=Strong,Orientation=minus,Sequence=CGGAGGAGAGTCTTCCG,Start=30#Element|Name=His3Rv43,Type=Promotert,SubType=His3Rv43,Strength=Strong,Orientation=minus,Sequence=ATTACTTTATATAATGTATAATTCATTATGTGATAATGCCAAT,Start=50#Element|Name=GuoMCB96Terminator,Type=Terminator,SubType=G…	GGGGACCAGGTGCCGTAAGTATATAACTGTCTAGAAATAAAGAGTATCATCTTTCAAAATTACTTTATATAATGTATAATTCATTATGTGATAATGCCAATCGCCGGAGGAGAGTCTTCCGGTCTAAAGCTAGCGATCCTAGGGCGATCA
51	51	4.641	SetName|SetName=duplicate barcodes hubs#Context|Name=context_His3Rv43AfterTerm#Element|Name=GAL4_W_m,Type=TF,SubType=GAL4,Strength=Weak,Orientation=minus,Sequence=CGGAGCAGTGCGGCGCG,Start=30#Element|Name=His3Rv43,Type=Promotert,SubType=His3Rv43,Strength=Strong,Orientation=minus,Sequence=ATTACTTTATATAATGTATAATTCATTATGTGATAATGCCAAT,Start=50#Element|Name=GuoMCB96Terminator,Type=Terminator,SubType=Guo…	GGGGACCAGGTGCCGTAAGTATATAACTGTCTAGAAATAAAGAGTATCATCTTTCAAAATTACTTTATATAATGTATAATTCATTATGTGATAATGCCAATCGCCGGAGCAGTGCGGCGCGTCCGGTGATTCGCGATCCTAGGGCGATCA
52	52	4.5344	SetName|SetName=duplicate barcodes hubs#Context|Name=context_His3Rv43AfterTerm#Element|Name=GAL4_S_m,Type=TF,SubType=GAL4,Strength=Strong,Orientation=minus,Sequence=CGGAGGAGAGTCTTCCG,Start=30#Element|Name=His3Rv43,Type=Promotert,SubType=His3Rv43,Strength=Strong,Orientation=minus,Sequence=ATTACTTTATATAATGTATAATTCATTATGTGATAATGCCAAT,Start=50#Element|Name=GuoMCB96Terminator,Type=Terminator,SubType=G…	GGGGACCAGGTGCCGTAAGTATATAACTGTCTAGAAATAAAGAGTATCATCTTTCAAAATTACTTTATATAATGTATAATTCATTATGTGATAATGCCAATCGCCGGAGGAGAGTCTTCCGGGCTACGAACTGCGATCCTAGGGCGATCA
53	53	4.7327	SetName|SetName=duplicate barcodes hubs#Context|Name=context_His3Rv43AfterTerm#Element|Name=GAL4_W_m,Type=TF,SubType=GAL4,Strength=Weak,Orientation=minus,Sequence=CGGAGCAGTGCGGCGCG,Start=30#Element|Name=His3Rv43,Type=Promotert,SubType=His3Rv43,Strength=Strong,Orientation=minus,Sequence=ATTACTTTATATAATGTATAATTCATTATGTGATAATGCCAAT,Start=50#Element|Name=GuoMCB96Terminator,Type=Terminator,SubType=Guo…	GGGGACCAGGTGCCGTAAGTATATAACTGTCTAGAAATAAAGAGTATCATCTTTCAAAATTACTTTATATAATGTATAATTCATTATGTGATAATGCCAATCGCCGGAGCAGTGCGGCGCGGGGCCCATGGAGCGATCCTAGGGCGATCA
54	54	4.6305	SetName|SetName=duplicate barcodes hubs#Context|Name=context_His3Rv43AfterTerm#Element|Name=GAL4_S_m,Type=TF,SubType=GAL4,Strength=Strong,Orientation=minus,Sequence=CGGAGGAGAGTCTTCCG,Start=30#Element|Name=His3Rv43,Type=Promotert,SubType=His3Rv43,Strength=Strong,Orientation=minus,Sequence=ATTACTTTATATAATGTATAATTCATTATGTGATAATGCCAAT,Start=50#Element|Name=GuoMCB96Terminator,Type=Terminator,SubType=G…	GGGGACCAGGTGCCGTAAGTATATAACTGTCTAGAAATAAAGAGTATCATCTTTCAAAATTACTTTATATAATGTATAATTCATTATGTGATAATGCCAATCGCCGGAGGAGAGTCTTCCGTTCTACTGACAGCGATCCTAGGGCGATCA
55	55	4.7129	SetName|SetName=duplicate barcodes hubs#Context|Name=context_His3Rv43AfterTerm#Element|Name=GAL4_W_m,Type=TF,SubType=GAL4,Strength=Weak,Orientation=minus,Sequence=CGGAGCAGTGCGGCGCG,Start=30#Element|Name=His3Rv43,Type=Promotert,SubType=His3Rv43,Strength=Strong,Orientation=minus,Sequence=ATTACTTTATATAATGTATAATTCATTATGTGATAATGCCAAT,Start=50#Element|Name=GuoMCB96Terminator,Type=Terminator,SubType=Guo…	GGGGACCAGGTGCCGTAAGTATATAACTGTCTAGAAATAAAGAGTATCATCTTTCAAAATTACTTTATATAATGTATAATTCATTATGTGATAATGCCAATCGCCGGAGCAGTGCGGCGCGAACTTCATGCAGCGATCCTAGGGCGATCA
56	56	4.6684	SetName|SetName=duplicate barcodes hubs#Context|Name=context_His3Rv43AfterTerm#Element|Name=GAL4_S_m,Type=TF,SubType=GAL4,Strength=Strong,Orientation=minus,Sequence=CGGAGGAGAGTCTTCCG,Start=30#Element|Name=His3Rv43,Type=Promotert,SubType=His3Rv43,Strength=Strong,Orientation=minus,Sequence=ATTACTTTATATAATGTATAATTCATTATGTGATAATGCCAAT,Start=50#Element|Name=GuoMCB96Terminator,Type=Terminator,SubType=G…	GGGGACCAGGTGCCGTAAGTATATAACTGTCTAGAAATAAAGAGTATCATCTTTCAAAATTACTTTATATAATGTATAATTCATTATGTGATAATGCCAATCGCCGGAGGAGAGTCTTCCGATCTAGTAGGAGCGATCCTAGGGCGATCA
57	57	4.935	SetName|SetName=duplicate barcodes hubs#Context|Name=context_His3Rv43AfterTerm#Element|Name=GAL4_W_m,Type=TF,SubType=GAL4,Strength=Weak,Orientation=minus,Sequence=CGGAGCAGTGCGGCGCG,Start=30#Element|Name=His3Rv43,Type=Promotert,SubType=His3Rv43,Strength=Strong,Orientation=minus,Sequence=ATTACTTTATATAATGTATAATTCATTATGTGATAATGCCAAT,Start=50#Element|Name=GuoMCB96Terminator,Type=Terminator,SubType=Guo…	GGGGACCAGGTGCCGTAAGTATATAACTGTCTAGAAATAAAGAGTATCATCTTTCAAAATTACTTTATATAATGTATAATTCATTATGTGATAATGCCAATCGCCGGAGCAGTGCGGCGCGAACCGTCGTTTGCGATCCTAGGGCGATCA
58	58	4.6457	SetName|SetName=duplicate barcodes hubs#Context|Name=context_His3Rv43AfterTerm#Element|Name=GAL4_S_m,Type=TF,SubType=GAL4,Strength=Strong,Orientation=minus,Sequence=CGGAGGAGAGTCTTCCG,Start=30#Element|Name=His3Rv43,Type=Promotert,SubType=His3Rv43,Strength=Strong,Orientation=minus,Sequence=ATTACTTTATATAATGTATAATTCATTATGTGATAATGCCAAT,Start=50#Element|Name=GuoMCB96Terminator,Type=Terminator,SubType=G…	GGGGACCAGGTGCCGTAAGTATATAACTGTCTAGAAATAAAGAGTATCATCTTTCAAAATTACTTTATATAATGTATAATTCATTATGTGATAATGCCAATCGCCGGAGGAGAGTCTTCCGGCTTTGAGCCAGCGATCCTAGGGCGATCA
59	59	4.2851	SetName|SetName=duplicate barcodes hubs#Context|Name=context_His3Rv43AfterTerm#Element|Name=GAL4_W_m,Type=TF,SubType=GAL4,Strength=Weak,Orientation=minus,Sequence=CGGAGCAGTGCGGCGCG,Start=30#Element|Name=His3Rv43,Type=Promotert,SubType=His3Rv43,Strength=Strong,Orientation=minus,Sequence=ATTACTTTATATAATGTATAATTCATTATGTGATAATGCCAAT,Start=50#Element|Name=GuoMCB96Terminator,Type=Terminator,SubType=Guo…	GGGGACCAGGTGCCGTAAGTATATAACTGTCTAGAAATAAAGAGTATCATCTTTCAAAATTACTTTATATAATGTATAATTCATTATGTGATAATGCCAATCGCCGGAGCAGTGCGGCGCGGTCACCGTGATGCGATCCTAGGGCGATCA
60	60	4.2385	SetName|SetName=duplicate barcodes hubs#Context|Name=context_His3Rv43AfterTerm#Element|Name=GAL4_S_m,Type=TF,SubType=GAL4,Strength=Strong,Orientation=minus,Sequence=CGGAGGAGAGTCTTCCG,Start=30#Element|Name=His3Rv43,Type=Promotert,SubType=His3Rv43,Strength=Strong,Orientation=minus,Sequence=ATTACTTTATATAATGTATAATTCATTATGTGATAATGCCAAT,Start=50#Element|Name=GuoMCB96Terminator,Type=Terminator,SubType=G…	GGGGACCAGGTGCCGTAAGTATATAACTGTCTAGAAATAAAGAGTATCATCTTTCAAAATTACTTTATATAATGTATAATTCATTATGTGATAATGCCAATCGCCGGAGGAGAGTCTTCCGGCTCAGATACCGCGATCCTAGGGCGATCA
61	61	4.5422	SetName|SetName=duplicate barcodes hubs#Context|Name=context_His3Rv43AfterTerm#Element|Name=GAL4_W_m,Type=TF,SubType=GAL4,Strength=Weak,Orientation=minus,Sequence=CGGAGCAGTGCGGCGCG,Start=30#Element|Name=His3Rv43,Type=Promotert,SubType=His3Rv43,Strength=Strong,Orientation=minus,Sequence=ATTACTTTATATAATGTATAATTCATTATGTGATAATGCCAAT,Start=50#Element|Name=GuoMCB96Terminator,Type=Terminator,SubType=Guo…	GGGGACCAGGTGCCGTAAGTATATAACTGTCTAGAAATAAAGAGTATCATCTTTCAAAATTACTTTATATAATGTATAATTCATTATGTGATAATGCCAATCGCCGGAGCAGTGCGGCGCGGTGTTCGGACAGCGATCCTAGGGCGATCA
62	62	4.5537	SetName|SetName=duplicate barcodes hubs#Context|Name=context_His3Rv43AfterTerm#Element|Name=GAL4_S_m,Type=TF,SubType=GAL4,Strength=Strong,Orientation=minus,Sequence=CGGAGGAGAGTCTTCCG,Start=30#Element|Name=His3Rv43,Type=Promotert,SubType=His3Rv43,Strength=Strong,Orientation=minus,Sequence=ATTACTTTATATAATGTATAATTCATTATGTGATAATGCCAAT,Start=50#Element|Name=GuoMCB96Terminator,Type=Terminator,SubType=G…	GGGGACCAGGTGCCGTAAGTATATAACTGTCTAGAAATAAAGAGTATCATCTTTCAAAATTACTTTATATAATGTATAATTCATTATGTGATAATGCCAATCGCCGGAGGAGAGTCTTCCGGTCAGTTGTACGCGATCCTAGGGCGATCA
63	63	4.6181	SetName|SetName=duplicate barcodes hubs#Context|Name=context_His3Rv43AfterTerm#Element|Name=GAL4_W_m,Type=TF,SubType=GAL4,Strength=Weak,Orientation=minus,Sequence=CGGAGCAGTGCGGCGCG,Start=30#Element|Name=His3Rv43,Type=Promotert,SubType=His3Rv43,Strength=Strong,Orientation=minus,Sequence=ATTACTTTATATAATGTATAATTCATTATGTGATAATGCCAAT,Start=50#Element|Name=GuoMCB96Terminator,Type=Terminator,SubType=Guo…	GGGGACCAGGTGCCGTAAGTATATAACTGTCTAGAAATAAAGAGTATCATCTTTCAAAATTACTTTATATAATGTATAATTCATTATGTGATAATGCCAATCGCCGGAGCAGTGCGGCGCGCAGCTCTAATTGCGATCCTAGGGCGATCA
64	64	0.3416	SetName|SetName=duplicate barcodes hubs#Context|Name=context_CYC1_512_mut#Barcode|Sequence=AAAACGCGGGT,Start=19,End=29,#Primer5|Sequence=GGGGACCAGGTGCCGTAAG,Start=132,End=150,#Primer3|Sequence=GCGATCCTAGGGCGATCA,Start=1,End=18,	GGGGACCAGGTGCCGTAAGGTCACGCTTACATTCACGCCCTCCTCCCACATCCGCTCTAACCGAAAAGGAAGGAGTTAGACAACCTGAAGTCTAGGTCCCTATTTATATTTCAAATTTTTCAAAACGCGGGTGCGATCCTAGGGCGATCA
65	65	0.326	SetName|SetName=duplicate barcodes hubs#Context|Name=context_CYC1_512_mut#Element|Name=GuoMCB96Terminator,Type=Terminator,SubType=GuoMCB96Terminator,Strength=Strong,Orientation=plus,Sequence=TATATAACTGTCTAGAAATAAAGAGTATCATCTTTCAAA,Start=30#Barcode|Sequence=TAACTGCAGTG,Start=19,End=29,#Primer5|Sequence=GGGGACCAGGTGCCGTAAG,Start=132,End=150,#Primer3|Sequence=GCGATCCTAGGGCGATCA,Start=1,End=18,	GGGGACCAGGTGCCGTAAGGTCACGCTTACATTCACGCCCTCCTCCCACATCCGCTCTAACCGAAAAGGAAGGAGTTAGACATATATAACTGTCTAGAAATAAAGAGTATCATCTTTCAAATAACTGCAGTGGCGATCCTAGGGCGATCA
66	66	0.4148	SetName|SetName=duplicate barcodes hubs#Context|Name=context_CYC1_512_mut#Element|Name=GuoMCB96Terminator,Type=Terminator,SubType=GuoMCB96Terminator,Strength=Strong,Orientation=plus,Sequence=TATATAACTGTCTAGAAATAAAGAGTATCATCTTTCAAA,Start=37#Barcode|Sequence=ATTCGCTAGGG,Start=19,End=29,#Primer5|Sequence=GGGGACCAGGTGCCGTAAG,Start=132,End=150,#Primer3|Sequence=GCGATCCTAGGGCGATCA,Start=1,End=18,	GGGGACCAGGTGCCGTAAGGTCACGCTTACATTCACGCCCTCCTCCCACATCCGCTCTAACCGAAAAGGAAGGAGTATATAACTGTCTAGAAATAAAGAGTATCATCTTTCAAAATTTTTCATTCGCTAGGGGCGATCCTAGGGCGATCA
67	67	1.0342	SetName|SetName=duplicate barcodes hubs#Context|Name=context_CYC1_512_mut#Element|Name=GuoMCB96Terminator,Type=Terminator,SubType=GuoMCB96Terminator,Strength=Strong,Orientation=plus,Sequence=TATATAACTGTCTAGAAATAAAGAGTATCATCTTTCAAA,Start=44#Barcode|Sequence=CACTTTAACAT,Start=19,End=29,#Primer5|Sequence=GGGGACCAGGTGCCGTAAG,Start=132,End=150,#Primer3|Sequence=GCGATCCTAGGGCGATCA,Start=1,End=18,	GGGGACCAGGTGCCGTAAGGTCACGCTTACATTCACGCCCTCCTCCCACATCCGCTCTAACCGAAAAGTATATAACTGTCTAGAAATAAAGAGTATCATCTTTCAAAATTTCAAATTTTTCCACTTTAACATGCGATCCTAGGGCGATCA
68	68	3.7842	SetName|SetName=duplicate barcodes hubs#Context|Name=context_CYC1_512_mut#Element|Name=GuoMCB96Terminator,Type=Terminator,SubType=GuoMCB96Terminator,Strength=Strong,Orientation=plus,Sequence=TATATAACTGTCTAGAAATAAAGAGTATCATCTTTCAAA,Start=51#Barcode|Sequence=AGGCGCAGTCT,Start=19,End=29,#Primer5|Sequence=GGGGACCAGGTGCCGTAAG,Start=132,End=150,#Primer3|Sequence=GCGATCCTAGGGCGATCA,Start=1,End=18,	GGGGACCAGGTGCCGTAAGGTCACGCTTACATTCACGCCCTCCTCCCACATCCGCTCTAACTATATAACTGTCTAGAAATAAAGAGTATCATCTTTCAAATATTTATATTTCAAATTTTTCAGGCGCAGTCTGCGATCCTAGGGCGATCA
69	69	2.394	SetName|SetName=duplicate barcodes hubs#Context|Name=context_CYC1_512_mut#Element|Name=GuoMCB96Terminator,Type=Terminator,SubType=GuoMCB96Terminator,Strength=Strong,Orientation=plus,Sequence=TATATAACTGTCTAGAAATAAAGAGTATCATCTTTCAAA,Start=58#Barcode|Sequence=ACCCGTAGCGA,Start=19,End=29,#Primer5|Sequence=GGGGACCAGGTGCCGTAAG,Start=132,End=150,#Primer3|Sequence=GCGATCCTAGGGCGATCA,Start=1,End=18,	GGGGACCAGGTGCCGTAAGGTCACGCTTACATTCACGCCCTCCTCCCACATCCGTATATAACTGTCTAGAAATAAAGAGTATCATCTTTCAAAAGGTCCCTATTTATATTTCAAATTTTTCACCCGTAGCGAGCGATCCTAGGGCGATCA
70	70	1.8393	SetName|SetName=duplicate barcodes hubs#Context|Name=context_CYC1_512_mut#Element|Name=GuoMCB96Terminator,Type=Terminator,SubType=GuoMCB96Terminator,Strength=Strong,Orientation=plus,Sequence=TATATAACTGTCTAGAAATAAAGAGTATCATCTTTCAAA,Start=64#Barcode|Sequence=GGTACGTCTAA,Start=19,End=29,#Primer5|Sequence=GGGGACCAGGTGCCGTAAG,Start=132,End=150,#Primer3|Sequence=GCGATCCTAGGGCGATCA,Start=1,End=18,	GGGGACCAGGTGCCGTAAGGTCACGCTTACATTCACGCCCTCCTCCCATATATAACTGTCTAGAAATAAAGAGTATCATCTTTCAAAAAGTCTAGGTCCCTATTTATATTTCAAATTTTTCGGTACGTCTAAGCGATCCTAGGGCGATCA
71	71	0.324	SetName|SetName=duplicate barcodes hubs#Context|Name=context_CYC1_512_mut#Barcode|Sequence=TATCCCGATCA,Start=19,End=29,#Primer5|Sequence=GGGGACCAGGTGCCGTAAG,Start=132,End=150,#Primer3|Sequence=GCGATCCTAGGGCGATCA,Start=1,End=18,	GGGGACCAGGTGCCGTAAGGTCACGCTTACATTCACGCCCTCCTCCCACATCCGCTCTAACCGAAAAGGAAGGAGTTAGACAACCTGAAGTCTAGGTCCCTATTTATATTTCAAATTTTTCTATCCCGATCAGCGATCCTAGGGCGATCA
72	72	0.4521	SetName|SetName=duplicate barcodes hubs#Context|Name=context_CYC1_512_mut#Element|Name=GuoMCB96Terminator,Type=Terminator,SubType=GuoMCB96Terminator,Strength=Strong,Orientation=plus,Sequence=TATATAACTGTCTAGAAATAAAGAGTATCATCTTTCAAA,Start=30#Barcode|Sequence=CGGTTTGTAAA,Start=19,End=29,#Primer5|Sequence=GGGGACCAGGTGCCGTAAG,Start=132,End=150,#Primer3|Sequence=GCGATCCTAGGGCGATCA,Start=1,End=18,	GGGGACCAGGTGCCGTAAGGTCACGCTTACATTCACGCCCTCCTCCCACATCCGCTCTAACCGAAAAGGAAGGAGTTAGACATATATAACTGTCTAGAAATAAAGAGTATCATCTTTCAAACGGTTTGTAAAGCGATCCTAGGGCGATCA
73	73	0.3354	SetName|SetName=duplicate barcodes hubs#Context|Name=context_CYC1_512_mut#Element|Name=GuoMCB96Terminator,Type=Terminator,SubType=GuoMCB96Terminator,Strength=Strong,Orientation=plus,Sequence=TATATAACTGTCTAGAAATAAAGAGTATCATCTTTCAAA,Start=37#Barcode|Sequence=CAGTGGCACAT,Start=19,End=29,#Primer5|Sequence=GGGGACCAGGTGCCGTAAG,Start=132,End=150,#Primer3|Sequence=GCGATCCTAGGGCGATCA,Start=1,End=18,	GGGGACCAGGTGCCGTAAGGTCACGCTTACATTCACGCCCTCCTCCCACATCCGCTCTAACCGAAAAGGAAGGAGTATATAACTGTCTAGAAATAAAGAGTATCATCTTTCAAAATTTTTCCAGTGGCACATGCGATCCTAGGGCGATCA
74	74	0.7591	SetName|SetName=duplicate barcodes hubs#Context|Name=context_CYC1_512_mut#Element|Name=GuoMCB96Terminator,Type=Terminator,SubType=GuoMCB96Terminator,Strength=Strong,Orientation=plus,Sequence=TATATAACTGTCTAGAAATAAAGAGTATCATCTTTCAAA,Start=44#Barcode|Sequence=CAATGGATTCT,Start=19,End=29,#Primer5|Sequence=GGGGACCAGGTGCCGTAAG,Start=132,End=150,#Primer3|Sequence=GCGATCCTAGGGCGATCA,Start=1,End=18,	GGGGACCAGGTGCCGTAAGGTCACGCTTACATTCACGCCCTCCTCCCACATCCGCTCTAACCGAAAAGTATATAACTGTCTAGAAATAAAGAGTATCATCTTTCAAAATTTCAAATTTTTCCAATGGATTCTGCGATCCTAGGGCGATCA
75	75	3.8946	SetName|SetName=duplicate barcodes hubs#Context|Name=context_CYC1_512_mut#Element|Name=GuoMCB96Terminator,Type=Terminator,SubType=GuoMCB96Terminator,Strength=Strong,Orientation=plus,Sequence=TATATAACTGTCTAGAAATAAAGAGTATCATCTTTCAAA,Start=51#Barcode|Sequence=CAGCTCTACGC,Start=19,End=29,#Primer5|Sequence=GGGGACCAGGTGCCGTAAG,Start=132,End=150,#Primer3|Sequence=GCGATCCTAGGGCGATCA,Start=1,End=18,	GGGGACCAGGTGCCGTAAGGTCACGCTTACATTCACGCCCTCCTCCCACATCCGCTCTAACTATATAACTGTCTAGAAATAAAGAGTATCATCTTTCAAATATTTATATTTCAAATTTTTCCAGCTCTACGCGCGATCCTAGGGCGATCA
76	76	1.6638	SetName|SetName=duplicate barcodes hubs#Context|Name=context_CYC1_512_mut#Element|Name=GuoMCB96Terminator,Type=Terminator,SubType=GuoMCB96Terminator,Strength=Strong,Orientation=plus,Sequence=TATATAACTGTCTAGAAATAAAGAGTATCATCTTTCAAA,Start=58#Barcode|Sequence=TGCGCAGCAGA,Start=19,End=29,#Primer5|Sequence=GGGGACCAGGTGCCGTAAG,Start=132,End=150,#Primer3|Sequence=GCGATCCTAGGGCGATCA,Start=1,End=18,	GGGGACCAGGTGCCGTAAGGTCACGCTTACATTCACGCCCTCCTCCCACATCCGTATATAACTGTCTAGAAATAAAGAGTATCATCTTTCAAAAGGTCCCTATTTATATTTCAAATTTTTCTGCGCAGCAGAGCGATCCTAGGGCGATCA
77	77	1.2055	SetName|SetName=duplicate barcodes hubs#Context|Name=context_CYC1_512_mut#Element|Name=GuoMCB96Terminator,Type=Terminator,SubType=GuoMCB96Terminator,Strength=Strong,Orientation=plus,Sequence=TATATAACTGTCTAGAAATAAAGAGTATCATCTTTCAAA,Start=64#Barcode|Sequence=TCGAATGGATA,Start=19,End=29,#Primer5|Sequence=GGGGACCAGGTGCCGTAAG,Start=132,End=150,#Primer3|Sequence=GCGATCCTAGGGCGATCA,Start=1,End=18,	GGGGACCAGGTGCCGTAAGGTCACGCTTACATTCACGCCCTCCTCCCATATATAACTGTCTAGAAATAAAGAGTATCATCTTTCAAAAAGTCTAGGTCCCTATTTATATTTCAAATTTTTCTCGAATGGATAGCGATCCTAGGGCGATCA
78	78	0.3088	SetName|SetName=duplicate barcodes hubs#Context|Name=context_CYC1_512_mut#Barcode|Sequence=TGGCTAAGCAC,Start=19,End=29,#Primer5|Sequence=GGGGACCAGGTGCCGTAAG,Start=132,End=150,#Primer3|Sequence=GCGATCCTAGGGCGATCA,Start=1,End=18,	GGGGACCAGGTGCCGTAAGGTCACGCTTACATTCACGCCCTCCTCCCACATCCGCTCTAACCGAAAAGGAAGGAGTTAGACAACCTGAAGTCTAGGTCCCTATTTATATTTCAAATTTTTCTGGCTAAGCACGCGATCCTAGGGCGATCA
79	79	0.2984	SetName|SetName=duplicate barcodes hubs#Context|Name=context_CYC1_512_mut#Element|Name=GuoMCB96Terminator,Type=Terminator,SubType=GuoMCB96Terminator,Strength=Strong,Orientation=plus,Sequence=TATATAACTGTCTAGAAATAAAGAGTATCATCTTTCAAA,Start=30#Barcode|Sequence=CGTCATTGCTC,Start=19,End=29,#Primer5|Sequence=GGGGACCAGGTGCCGTAAG,Start=132,End=150,#Primer3|Sequence=GCGATCCTAGGGCGATCA,Start=1,End=18,	GGGGACCAGGTGCCGTAAGGTCACGCTTACATTCACGCCCTCCTCCCACATCCGCTCTAACCGAAAAGGAAGGAGTTAGACATATATAACTGTCTAGAAATAAAGAGTATCATCTTTCAAACGTCATTGCTCGCGATCCTAGGGCGATCA
80	80	0.4149	SetName|SetName=duplicate barcodes hubs#Context|Name=context_CYC1_512_mut#Element|Name=GuoMCB96Terminator,Type=Terminator,SubType=GuoMCB96Terminator,Strength=Strong,Orientation=plus,Sequence=TATATAACTGTCTAGAAATAAAGAGTATCATCTTTCAAA,Start=37#Barcode|Sequence=CATTCTTGCAG,Start=19,End=29,#Primer5|Sequence=GGGGACCAGGTGCCGTAAG,Start=132,End=150,#Primer3|Sequence=GCGATCCTAGGGCGATCA,Start=1,End=18,	GGGGACCAGGTGCCGTAAGGTCACGCTTACATTCACGCCCTCCTCCCACATCCGCTCTAACCGAAAAGGAAGGAGTATATAACTGTCTAGAAATAAAGAGTATCATCTTTCAAAATTTTTCCATTCTTGCAGGCGATCCTAGGGCGATCA
81	81	0.6336	SetName|SetName=duplicate barcodes hubs#Context|Name=context_CYC1_512_mut#Element|Name=GuoMCB96Terminator,Type=Terminator,SubType=GuoMCB96Terminator,Strength=Strong,Orientation=plus,Sequence=TATATAACTGTCTAGAAATAAAGAGTATCATCTTTCAAA,Start=44#Barcode|Sequence=CAGTCATAGCA,Start=19,End=29,#Primer5|Sequence=GGGGACCAGGTGCCGTAAG,Start=132,End=150,#Primer3|Sequence=GCGATCCTAGGGCGATCA,Start=1,End=18,	GGGGACCAGGTGCCGTAAGGTCACGCTTACATTCACGCCCTCCTCCCACATCCGCTCTAACCGAAAAGTATATAACTGTCTAGAAATAAAGAGTATCATCTTTCAAAATTTCAAATTTTTCCAGTCATAGCAGCGATCCTAGGGCGATCA
82	82	3.0288	SetName|SetName=duplicate barcodes hubs#Context|Name=context_CYC1_512_mut#Element|Name=GuoMCB96Terminator,Type=Terminator,SubType=GuoMCB96Terminator,Strength=Strong,Orientation=plus,Sequence=TATATAACTGTCTAGAAATAAAGAGTATCATCTTTCAAA,Start=51#Barcode|Sequence=GCTTAGTGGAG,Start=19,End=29,#Primer5|Sequence=GGGGACCAGGTGCCGTAAG,Start=132,End=150,#Primer3|Sequence=GCGATCCTAGGGCGATCA,Start=1,End=18,	GGGGACCAGGTGCCGTAAGGTCACGCTTACATTCACGCCCTCCTCCCACATCCGCTCTAACTATATAACTGTCTAGAAATAAAGAGTATCATCTTTCAAATATTTATATTTCAAATTTTTCGCTTAGTGGAGGCGATCCTAGGGCGATCA
83	83	1.4632	SetName|SetName=duplicate barcodes hubs#Context|Name=context_CYC1_512_mut#Element|Name=GuoMCB96Terminator,Type=Terminator,SubType=GuoMCB96Terminator,Strength=Strong,Orientation=plus,Sequence=TATATAACTGTCTAGAAATAAAGAGTATCATCTTTCAAA,Start=58#Barcode|Sequence=CTCTATTCTGC,Start=19,End=29,#Primer5|Sequence=GGGGACCAGGTGCCGTAAG,Start=132,End=150,#Primer3|Sequence=GCGATCCTAGGGCGATCA,Start=1,End=18,	GGGGACCAGGTGCCGTAAGGTCACGCTTACATTCACGCCCTCCTCCCACATCCGTATATAACTGTCTAGAAATAAAGAGTATCATCTTTCAAAAGGTCCCTATTTATATTTCAAATTTTTCCTCTATTCTGCGCGATCCTAGGGCGATCA
84	84	2.5714	SetName|SetName=duplicate barcodes hubs#Context|Name=context_CYC1_512_mut#Element|Name=GuoMCB96Terminator,Type=Terminator,SubType=GuoMCB96Terminator,Strength=Strong,Orientation=plus,Sequence=TATATAACTGTCTAGAAATAAAGAGTATCATCTTTCAAA,Start=64#Barcode|Sequence=AATAGCAATTC,Start=19,End=29,#Primer5|Sequence=GGGGACCAGGTGCCGTAAG,Start=132,End=150,#Primer3|Sequence=GCGATCCTAGGGCGATCA,Start=1,End=18,	GGGGACCAGGTGCCGTAAGGTCACGCTTACATTCACGCCCTCCTCCCATATATAACTGTCTAGAAATAAAGAGTATCATCTTTCAAAAAGTCTAGGTCCCTATTTATATTTCAAATTTTTCAATAGCAATTCGCGATCCTAGGGCGATCA
85	85	0.3165	SetName|SetName=duplicate barcodes hubs#Context|Name=context_CYC1_512_mut#Barcode|Sequence=TAAACTAGTAG,Start=19,End=29,#Primer5|Sequence=GGGGACCAGGTGCCGTAAG,Start=132,End=150,#Primer3|Sequence=GCGATCCTAGGGCGATCA,Start=1,End=18,	GGGGACCAGGTGCCGTAAGGTCACGCTTACATTCACGCCCTCCTCCCACATCCGCTCTAACCGAAAAGGAAGGAGTTAGACAACCTGAAGTCTAGGTCCCTATTTATATTTCAAATTTTTCTAAACTAGTAGGCGATCCTAGGGCGATCA
86	86	0.3014	SetName|SetName=duplicate barcodes hubs#Context|Name=context_CYC1_512_mut#Element|Name=GuoMCB96Terminator,Type=Terminator,SubType=GuoMCB96Terminator,Strength=Strong,Orientation=plus,Sequence=TATATAACTGTCTAGAAATAAAGAGTATCATCTTTCAAA,Start=30#Barcode|Sequence=TGCGTTCAGTA,Start=19,End=29,#Primer5|Sequence=GGGGACCAGGTGCCGTAAG,Start=132,End=150,#Primer3|Sequence=GCGATCCTAGGGCGATCA,Start=1,End=18,	GGGGACCAGGTGCCGTAAGGTCACGCTTACATTCACGCCCTCCTCCCACATCCGCTCTAACCGAAAAGGAAGGAGTTAGACATATATAACTGTCTAGAAATAAAGAGTATCATCTTTCAAATGCGTTCAGTAGCGATCCTAGGGCGATCA
87	87	0.366	SetName|SetName=duplicate barcodes hubs#Context|Name=context_CYC1_512_mut#Element|Name=GuoMCB96Terminator,Type=Terminator,SubType=GuoMCB96Terminator,Strength=Strong,Orientation=plus,Sequence=TATATAACTGTCTAGAAATAAAGAGTATCATCTTTCAAA,Start=37#Barcode|Sequence=GCGTTAACGGT,Start=19,End=29,#Primer5|Sequence=GGGGACCAGGTGCCGTAAG,Start=132,End=150,#Primer3|Sequence=GCGATCCTAGGGCGATCA,Start=1,End=18,	GGGGACCAGGTGCCGTAAGGTCACGCTTACATTCACGCCCTCCTCCCACATCCGCTCTAACCGAAAAGGAAGGAGTATATAACTGTCTAGAAATAAAGAGTATCATCTTTCAAAATTTTTCGCGTTAACGGTGCGATCCTAGGGCGATCA
88	88	0.6433	SetName|SetName=duplicate barcodes hubs#Context|Name=context_CYC1_512_mut#Element|Name=GuoMCB96Terminator,Type=Terminator,SubType=GuoMCB96Terminator,Strength=Strong,Orientation=plus,Sequence=TATATAACTGTCTAGAAATAAAGAGTATCATCTTTCAAA,Start=44#Barcode|Sequence=CCAGTAACTTA,Start=19,End=29,#Primer5|Sequence=GGGGACCAGGTGCCGTAAG,Start=132,End=150,#Primer3|Sequence=GCGATCCTAGGGCGATCA,Start=1,End=18,	GGGGACCAGGTGCCGTAAGGTCACGCTTACATTCACGCCCTCCTCCCACATCCGCTCTAACCGAAAAGTATATAACTGTCTAGAAATAAAGAGTATCATCTTTCAAAATTTCAAATTTTTCCCAGTAACTTAGCGATCCTAGGGCGATCA
89	89	3.5984	SetName|SetName=duplicate barcodes hubs#Context|Name=context_CYC1_512_mut#Element|Name=GuoMCB96Terminator,Type=Terminator,SubType=GuoMCB96Terminator,Strength=Strong,Orientation=plus,Sequence=TATATAACTGTCTAGAAATAAAGAGTATCATCTTTCAAA,Start=51#Barcode|Sequence=CACTGCGTGTG,Start=19,End=29,#Primer5|Sequence=GGGGACCAGGTGCCGTAAG,Start=132,End=150,#Primer3|Sequence=GCGATCCTAGGGCGATCA,Start=1,End=18,	GGGGACCAGGTGCCGTAAGGTCACGCTTACATTCACGCCCTCCTCCCACATCCGCTCTAACTATATAACTGTCTAGAAATAAAGAGTATCATCTTTCAAATATTTATATTTCAAATTTTTCCACTGCGTGTGGCGATCCTAGGGCGATCA
90	90	1.1868	SetName|SetName=duplicate barcodes hubs#Context|Name=context_CYC1_512_mut#Element|Name=GuoMCB96Terminator,Type=Terminator,SubType=GuoMCB96Terminator,Strength=Strong,Orientation=plus,Sequence=TATATAACTGTCTAGAAATAAAGAGTATCATCTTTCAAA,Start=58#Barcode|Sequence=GATCACACCAG,Start=19,End=29,#Primer5|Sequence=GGGGACCAGGTGCCGTAAG,Start=132,End=150,#Primer3|Sequence=GCGATCCTAGGGCGATCA,Start=1,End=18,	GGGGACCAGGTGCCGTAAGGTCACGCTTACATTCACGCCCTCCTCCCACATCCGTATATAACTGTCTAGAAATAAAGAGTATCATCTTTCAAAAGGTCCCTATTTATATTTCAAATTTTTCGATCACACCAGGCGATCCTAGGGCGATCA
91	91	2.746	SetName|SetName=duplicate barcodes hubs#Context|Name=context_CYC1_512_mut#Element|Name=GuoMCB96Terminator,Type=Terminator,SubType=GuoMCB96Terminator,Strength=Strong,Orientation=plus,Sequence=TATATAACTGTCTAGAAATAAAGAGTATCATCTTTCAAA,Start=64#Barcode|Sequence=GCTCTGGGACT,Start=19,End=29,#Primer5|Sequence=GGGGACCAGGTGCCGTAAG,Start=132,End=150,#Primer3|Sequence=GCGATCCTAGGGCGATCA,Start=1,End=18,	GGGGACCAGGTGCCGTAAGGTCACGCTTACATTCACGCCCTCCTCCCATATATAACTGTCTAGAAATAAAGAGTATCATCTTTCAAAAAGTCTAGGTCCCTATTTATATTTCAAATTTTTCGCTCTGGGACTGCGATCCTAGGGCGATCA
92	92	0.3255	SetName|SetName=duplicate barcodes hubs#Context|Name=context_CYC1_512_mut#Barcode|Sequence=GACTCGCACAG,Start=19,End=29,#Primer5|Sequence=GGGGACCAGGTGCCGTAAG,Start=132,End=150,#Primer3|Sequence=GCGATCCTAGGGCGATCA,Start=1,End=18,	GGGGACCAGGTGCCGTAAGGTCACGCTTACATTCACGCCCTCCTCCCACATCCGCTCTAACCGAAAAGGAAGGAGTTAGACAACCTGAAGTCTAGGTCCCTATTTATATTTCAAATTTTTCGACTCGCACAGGCGATCCTAGGGCGATCA
93	93	0.2565	SetName|SetName=duplicate barcodes hubs#Context|Name=context_CYC1_512_mut#Element|Name=GuoMCB96Terminator,Type=Terminator,SubType=GuoMCB96Terminator,Strength=Strong,Orientation=plus,Sequence=TATATAACTGTCTAGAAATAAAGAGTATCATCTTTCAAA,Start=30#Barcode|Sequence=GCTTGTATCGC,Start=19,End=29,#Primer5|Sequence=GGGGACCAGGTGCCGTAAG,Start=132,End=150,#Primer3|Sequence=GCGATCCTAGGGCGATCA,Start=1,End=18,	GGGGACCAGGTGCCGTAAGGTCACGCTTACATTCACGCCCTCCTCCCACATCCGCTCTAACCGAAAAGGAAGGAGTTAGACATATATAACTGTCTAGAAATAAAGAGTATCATCTTTCAAAGCTTGTATCGCGCGATCCTAGGGCGATCA
94	94	0.3844	SetName|SetName=duplicate barcodes hubs#Context|Name=context_CYC1_512_mut#Element|Name=GuoMCB96Terminator,Type=Terminator,SubType=GuoMCB96Terminator,Strength=Strong,Orientation=plus,Sequence=TATATAACTGTCTAGAAATAAAGAGTATCATCTTTCAAA,Start=37#Barcode|Sequence=CCTCTGCTAAG,Start=19,End=29,#Primer5|Sequence=GGGGACCAGGTGCCGTAAG,Start=132,End=150,#Primer3|Sequence=GCGATCCTAGGGCGATCA,Start=1,End=18,	GGGGACCAGGTGCCGTAAGGTCACGCTTACATTCACGCCCTCCTCCCACATCCGCTCTAACCGAAAAGGAAGGAGTATATAACTGTCTAGAAATAAAGAGTATCATCTTTCAAAATTTTTCCCTCTGCTAAGGCGATCCTAGGGCGATCA
95	95	0.638	SetName|SetName=duplicate barcodes hubs#Context|Name=context_CYC1_512_mut#Element|Name=GuoMCB96Terminator,Type=Terminator,SubType=GuoMCB96Terminator,Strength=Strong,Orientation=plus,Sequence=TATATAACTGTCTAGAAATAAAGAGTATCATCTTTCAAA,Start=44#Barcode|Sequence=AGAACCAAGAG,Start=19,End=29,#Primer5|Sequence=GGGGACCAGGTGCCGTAAG,Start=132,End=150,#Primer3|Sequence=GCGATCCTAGGGCGATCA,Start=1,End=18,	GGGGACCAGGTGCCGTAAGGTCACGCTTACATTCACGCCCTCCTCCCACATCCGCTCTAACCGAAAAGTATATAACTGTCTAGAAATAAAGAGTATCATCTTTCAAAATTTCAAATTTTTCAGAACCAAGAGGCGATCCTAGGGCGATCA
96	96	4.0986	SetName|SetName=duplicate barcodes hubs#Context|Name=context_CYC1_512_mut#Element|Name=GuoMCB96Terminator,Type=Terminator,SubType=GuoMCB96Terminator,Strength=Strong,Orientation=plus,Sequence=TATATAACTGTCTAGAAATAAAGAGTATCATCTTTCAAA,Start=51#Barcode|Sequence=TTAAATTCGTG,Start=19,End=29,#Primer5|Sequence=GGGGACCAGGTGCCGTAAG,Start=132,End=150,#Primer3|Sequence=GCGATCCTAGGGCGATCA,Start=1,End=18,	GGGGACCAGGTGCCGTAAGGTCACGCTTACATTCACGCCCTCCTCCCACATCCGCTCTAACTATATAACTGTCTAGAAATAAAGAGTATCATCTTTCAAATATTTATATTTCAAATTTTTCTTAAATTCGTGGCGATCCTAGGGCGATCA
97	97	1.1266	SetName|SetName=duplicate barcodes hubs#Context|Name=context_CYC1_512_mut#Element|Name=GuoMCB96Terminator,Type=Terminator,SubType=GuoMCB96Terminator,Strength=Strong,Orientation=plus,Sequence=TATATAACTGTCTAGAAATAAAGAGTATCATCTTTCAAA,Start=58#Barcode|Sequence=CGACGACGATT,Start=19,End=29,#Primer5|Sequence=GGGGACCAGGTGCCGTAAG,Start=132,End=150,#Primer3|Sequence=GCGATCCTAGGGCGATCA,Start=1,End=18,	GGGGACCAGGTGCCGTAAGGTCACGCTTACATTCACGCCCTCCTCCCACATCCGTATATAACTGTCTAGAAATAAAGAGTATCATCTTTCAAAAGGTCCCTATTTATATTTCAAATTTTTCCGACGACGATTGCGATCCTAGGGCGATCA
98	98	1.7328	SetName|SetName=duplicate barcodes hubs#Context|Name=context_CYC1_512_mut#Element|Name=GuoMCB96Terminator,Type=Terminator,SubType=GuoMCB96Terminator,Strength=Strong,Orientation=plus,Sequence=TATATAACTGTCTAGAAATAAAGAGTATCATCTTTCAAA,Start=64#Barcode|Sequence=TGGAGGTCCAT,Start=19,End=29,#Primer5|Sequence=GGGGACCAGGTGCCGTAAG,Start=132,End=150,#Primer3|Sequence=GCGATCCTAGGGCGATCA,Start=1,End=18,	GGGGACCAGGTGCCGTAAGGTCACGCTTACATTCACGCCCTCCTCCCATATATAACTGTCTAGAAATAAAGAGTATCATCTTTCAAAAAGTCTAGGTCCCTATTTATATTTCAAATTTTTCTGGAGGTCCATGCGATCCTAGGGCGATCA
99	99	0.2985	SetName|SetName=duplicate barcodes hubs#Context|Name=context_CYC1_512_mut#Barcode|Sequence=CAAAGTCTTGG,Start=19,End=29,#Primer5|Sequence=GGGGACCAGGTGCCGTAAG,Start=132,End=150,#Primer3|Sequence=GCGATCCTAGGGCGATCA,Start=1,End=18,	GGGGACCAGGTGCCGTAAGGTCACGCTTACATTCACGCCCTCCTCCCACATCCGCTCTAACCGAAAAGGAAGGAGTTAGACAACCTGAAGTCTAGGTCCCTATTTATATTTCAAATTTTTCCAAAGTCTTGGGCGATCCTAGGGCGATCA
100	100	0.2833	SetName|SetName=duplicate barcodes hubs#Context|Name=context_CYC1_512_mut#Element|Name=GuoMCB96Terminator,Type=Terminator,SubType=GuoMCB96Terminator,Strength=Strong,Orientation=plus,Sequence=TATATAACTGTCTAGAAATAAAGAGTATCATCTTTCAAA,Start=30#Barcode|Sequence=AAGGTGGCTAT,Start=19,End=29,#Primer5|Sequence=GGGGACCAGGTGCCGTAAG,Start=132,End=150,#Primer3|Sequence=GCGATCCTAGGGCGATCA,Start=1,End=18,	GGGGACCAGGTGCCGTAAGGTCACGCTTACATTCACGCCCTCCTCCCACATCCGCTCTAACCGAAAAGGAAGGAGTTAGACATATATAACTGTCTAGAAATAAAGAGTATCATCTTTCAAAAAGGTGGCTATGCGATCCTAGGGCGATCA
101	101	0.5978	SetName|SetName=duplicate barcodes hubs#Context|Name=context_CYC1_512_mut#Element|Name=GuoMCB96Terminator,Type=Terminator,SubType=GuoMCB96Terminator,Strength=Strong,Orientation=plus,Sequence=TATATAACTGTCTAGAAATAAAGAGTATCATCTTTCAAA,Start=37#Barcode|Sequence=AGATCGTAATT,Start=19,End=29,#Primer5|Sequence=GGGGACCAGGTGCCGTAAG,Start=132,End=150,#Primer3|Sequence=GCGATCCTAGGGCGATCA,Start=1,End=18,	GGGGACCAGGTGCCGTAAGGTCACGCTTACATTCACGCCCTCCTCCCACATCCGCTCTAACCGAAAAGGAAGGAGTATATAACTGTCTAGAAATAAAGAGTATCATCTTTCAAAATTTTTCAGATCGTAATTGCGATCCTAGGGCGATCA
102	102	0.6955	SetName|SetName=duplicate barcodes hubs#Context|Name=context_CYC1_512_mut#Element|Name=GuoMCB96Terminator,Type=Terminator,SubType=GuoMCB96Terminator,Strength=Strong,Orientation=plus,Sequence=TATATAACTGTCTAGAAATAAAGAGTATCATCTTTCAAA,Start=44#Barcode|Sequence=GACCCATGTAT,Start=19,End=29,#Primer5|Sequence=GGGGACCAGGTGCCGTAAG,Start=132,End=150,#Primer3|Sequence=GCGATCCTAGGGCGATCA,Start=1,End=18,	GGGGACCAGGTGCCGTAAGGTCACGCTTACATTCACGCCCTCCTCCCACATCCGCTCTAACCGAAAAGTATATAACTGTCTAGAAATAAAGAGTATCATCTTTCAAAATTTCAAATTTTTCGACCCATGTATGCGATCCTAGGGCGATCA
103	103	3.6936	SetName|SetName=duplicate barcodes hubs#Context|Name=context_CYC1_512_mut#Element|Name=GuoMCB96Terminator,Type=Terminator,SubType=GuoMCB96Terminator,Strength=Strong,Orientation=plus,Sequence=TATATAACTGTCTAGAAATAAAGAGTATCATCTTTCAAA,Start=51#Barcode|Sequence=GCGAACATAGC,Start=19,End=29,#Primer5|Sequence=GGGGACCAGGTGCCGTAAG,Start=132,End=150,#Primer3|Sequence=GCGATCCTAGGGCGATCA,Start=1,End=18,	GGGGACCAGGTGCCGTAAGGTCACGCTTACATTCACGCCCTCCTCCCACATCCGCTCTAACTATATAACTGTCTAGAAATAAAGAGTATCATCTTTCAAATATTTATATTTCAAATTTTTCGCGAACATAGCGCGATCCTAGGGCGATCA
104	104	1.2858	SetName|SetName=duplicate barcodes hubs#Context|Name=context_CYC1_512_mut#Element|Name=GuoMCB96Terminator,Type=Terminator,SubType=GuoMCB96Terminator,Strength=Strong,Orientation=plus,Sequence=TATATAACTGTCTAGAAATAAAGAGTATCATCTTTCAAA,Start=58#Barcode|Sequence=ACGGTGGTTTA,Start=19,End=29,#Primer5|Sequence=GGGGACCAGGTGCCGTAAG,Start=132,End=150,#Primer3|Sequence=GCGATCCTAGGGCGATCA,Start=1,End=18,	GGGGACCAGGTGCCGTAAGGTCACGCTTACATTCACGCCCTCCTCCCACATCCGTATATAACTGTCTAGAAATAAAGAGTATCATCTTTCAAAAGGTCCCTATTTATATTTCAAATTTTTCACGGTGGTTTAGCGATCCTAGGGCGATCA
105	105	1.2373	SetName|SetName=duplicate barcodes hubs#Context|Name=context_CYC1_512_mut#Element|Name=GuoMCB96Terminator,Type=Terminator,SubType=GuoMCB96Terminator,Strength=Strong,Orientation=plus,Sequence=TATATAACTGTCTAGAAATAAAGAGTATCATCTTTCAAA,Start=64#Barcode|Sequence=GATCCAGAGAC,Start=19,End=29,#Primer5|Sequence=GGGGACCAGGTGCCGTAAG,Start=132,End=150,#Primer3|Sequence=GCGATCCTAGGGCGATCA,Start=1,End=18,	GGGGACCAGGTGCCGTAAGGTCACGCTTACATTCACGCCCTCCTCCCATATATAACTGTCTAGAAATAAAGAGTATCATCTTTCAAAAAGTCTAGGTCCCTATTTATATTTCAAATTTTTCGATCCAGAGACGCGATCCTAGGGCGATCA
106	106	0.3092	SetName|SetName=duplicate barcodes hubs#Context|Name=context_CYC1_512_mut#Barcode|Sequence=TAGTCGACGAC,Start=19,End=29,#Primer5|Sequence=GGGGACCAGGTGCCGTAAG,Start=132,End=150,#Primer3|Sequence=GCGATCCTAGGGCGATCA,Start=1,End=18,	GGGGACCAGGTGCCGTAAGGTCACGCTTACATTCACGCCCTCCTCCCACATCCGCTCTAACCGAAAAGGAAGGAGTTAGACAACCTGAAGTCTAGGTCCCTATTTATATTTCAAATTTTTCTAGTCGACGACGCGATCCTAGGGCGATCA
107	107	0.312	SetName|SetName=duplicate barcodes hubs#Context|Name=context_CYC1_512_mut#Element|Name=GuoMCB96Terminator,Type=Terminator,SubType=GuoMCB96Terminator,Strength=Strong,Orientation=plus,Sequence=TATATAACTGTCTAGAAATAAAGAGTATCATCTTTCAAA,Start=30#Barcode|Sequence=GCCACTGGACG,Start=19,End=29,#Primer5|Sequence=GGGGACCAGGTGCCGTAAG,Start=132,End=150,#Primer3|Sequence=GCGATCCTAGGGCGATCA,Start=1,End=18,	GGGGACCAGGTGCCGTAAGGTCACGCTTACATTCACGCCCTCCTCCCACATCCGCTCTAACCGAAAAGGAAGGAGTTAGACATATATAACTGTCTAGAAATAAAGAGTATCATCTTTCAAAGCCACTGGACGGCGATCCTAGGGCGATCA
108	108	0.3706	SetName|SetName=duplicate barcodes hubs#Context|Name=context_CYC1_512_mut#Element|Name=GuoMCB96Terminator,Type=Terminator,SubType=GuoMCB96Terminator,Strength=Strong,Orientation=plus,Sequence=TATATAACTGTCTAGAAATAAAGAGTATCATCTTTCAAA,Start=37#Barcode|Sequence=AAATACCGGTT,Start=19,End=29,#Primer5|Sequence=GGGGACCAGGTGCCGTAAG,Start=132,End=150,#Primer3|Sequence=GCGATCCTAGGGCGATCA,Start=1,End=18,	GGGGACCAGGTGCCGTAAGGTCACGCTTACATTCACGCCCTCCTCCCACATCCGCTCTAACCGAAAAGGAAGGAGTATATAACTGTCTAGAAATAAAGAGTATCATCTTTCAAAATTTTTCAAATACCGGTTGCGATCCTAGGGCGATCA
109	109	1.3035	SetName|SetName=duplicate barcodes hubs#Context|Name=context_CYC1_512_mut#Element|Name=GuoMCB96Terminator,Type=Terminator,SubType=GuoMCB96Terminator,Strength=Strong,Orientation=plus,Sequence=TATATAACTGTCTAGAAATAAAGAGTATCATCTTTCAAA,Start=44#Barcode|Sequence=AACTTCATAGC,Start=19,End=29,#Primer5|Sequence=GGGGACCAGGTGCCGTAAG,Start=132,End=150,#Primer3|Sequence=GCGATCCTAGGGCGATCA,Start=1,End=18,	GGGGACCAGGTGCCGTAAGGTCACGCTTACATTCACGCCCTCCTCCCACATCCGCTCTAACCGAAAAGTATATAACTGTCTAGAAATAAAGAGTATCATCTTTCAAAATTTCAAATTTTTCAACTTCATAGCGCGATCCTAGGGCGATCA
110	110	3.7591	SetName|SetName=duplicate barcodes hubs#Context|Name=context_CYC1_512_mut#Element|Name=GuoMCB96Terminator,Type=Terminator,SubType=GuoMCB96Terminator,Strength=Strong,Orientation=plus,Sequence=TATATAACTGTCTAGAAATAAAGAGTATCATCTTTCAAA,Start=51#Barcode|Sequence=TGATCACCTGT,Start=19,End=29,#Primer5|Sequence=GGGGACCAGGTGCCGTAAG,Start=132,End=150,#Primer3|Sequence=GCGATCCTAGGGCGATCA,Start=1,End=18,	GGGGACCAGGTGCCGTAAGGTCACGCTTACATTCACGCCCTCCTCCCACATCCGCTCTAACTATATAACTGTCTAGAAATAAAGAGTATCATCTTTCAAATATTTATATTTCAAATTTTTCTGATCACCTGTGCGATCCTAGGGCGATCA
111	111	2.3891	SetName|SetName=duplicate barcodes hubs#Context|Name=context_CYC1_512_mut#Element|Name=GuoMCB96Terminator,Type=Terminator,SubType=GuoMCB96Terminator,Strength=Strong,Orientation=plus,Sequence=TATATAACTGTCTAGAAATAAAGAGTATCATCTTTCAAA,Start=58#Barcode|Sequence=TTAGAACTTGA,Start=19,End=29,#Primer5|Sequence=GGGGACCAGGTGCCGTAAG,Start=132,End=150,#Primer3|Sequence=GCGATCCTAGGGCGATCA,Start=1,End=18,	GGGGACCAGGTGCCGTAAGGTCACGCTTACATTCACGCCCTCCTCCCACATCCGTATATAACTGTCTAGAAATAAAGAGTATCATCTTTCAAAAGGTCCCTATTTATATTTCAAATTTTTCTTAGAACTTGAGCGATCCTAGGGCGATCA
112	112	2.8094	SetName|SetName=duplicate barcodes hubs#Context|Name=context_CYC1_512_mut#Element|Name=GuoMCB96Terminator,Type=Terminator,SubType=GuoMCB96Terminator,Strength=Strong,Orientation=plus,Sequence=TATATAACTGTCTAGAAATAAAGAGTATCATCTTTCAAA,Start=64#Barcode|Sequence=CGGTCCTCAAC,Start=19,End=29,#Primer5|Sequence=GGGGACCAGGTGCCGTAAG,Start=132,End=150,#Primer3|Sequence=GCGATCCTAGGGCGATCA,Start=1,End=18,	GGGGACCAGGTGCCGTAAGGTCACGCTTACATTCACGCCCTCCTCCCATATATAACTGTCTAGAAATAAAGAGTATCATCTTTCAAAAAGTCTAGGTCCCTATTTATATTTCAAATTTTTCCGGTCCTCAACGCGATCCTAGGGCGATCA
113	113	0.2915	SetName|SetName=duplicate barcodes hubs#Context|Name=context_CYC1_512_mut#Barcode|Sequence=ACCGTACCGGA,Start=19,End=29,#Primer5|Sequence=GGGGACCAGGTGCCGTAAG,Start=132,End=150,#Primer3|Sequence=GCGATCCTAGGGCGATCA,Start=1,End=18,	GGGGACCAGGTGCCGTAAGGTCACGCTTACATTCACGCCCTCCTCCCACATCCGCTCTAACCGAAAAGGAAGGAGTTAGACAACCTGAAGTCTAGGTCCCTATTTATATTTCAAATTTTTCACCGTACCGGAGCGATCCTAGGGCGATCA
114	114	0.3168	SetName|SetName=duplicate barcodes hubs#Context|Name=context_CYC1_512_mut#Element|Name=GuoMCB96Terminator,Type=Terminator,SubType=GuoMCB96Terminator,Strength=Strong,Orientation=plus,Sequence=TATATAACTGTCTAGAAATAAAGAGTATCATCTTTCAAA,Start=30#Barcode|Sequence=TCTCTTCAGAG,Start=19,End=29,#Primer5|Sequence=GGGGACCAGGTGCCGTAAG,Start=132,End=150,#Primer3|Sequence=GCGATCCTAGGGCGATCA,Start=1,End=18,	GGGGACCAGGTGCCGTAAGGTCACGCTTACATTCACGCCCTCCTCCCACATCCGCTCTAACCGAAAAGGAAGGAGTTAGACATATATAACTGTCTAGAAATAAAGAGTATCATCTTTCAAATCTCTTCAGAGGCGATCCTAGGGCGATCA
115	115	0.3662	SetName|SetName=duplicate barcodes hubs#Context|Name=context_CYC1_512_mut#Element|Name=GuoMCB96Terminator,Type=Terminator,SubType=GuoMCB96Terminator,Strength=Strong,Orientation=plus,Sequence=TATATAACTGTCTAGAAATAAAGAGTATCATCTTTCAAA,Start=37#Barcode|Sequence=CCAGTGGTCCT,Start=19,End=29,#Primer5|Sequence=GGGGACCAGGTGCCGTAAG,Start=132,End=150,#Primer3|Sequence=GCGATCCTAGGGCGATCA,Start=1,End=18,	GGGGACCAGGTGCCGTAAGGTCACGCTTACATTCACGCCCTCCTCCCACATCCGCTCTAACCGAAAAGGAAGGAGTATATAACTGTCTAGAAATAAAGAGTATCATCTTTCAAAATTTTTCCCAGTGGTCCTGCGATCCTAGGGCGATCA
116	116	1.1431	SetName|SetName=duplicate barcodes hubs#Context|Name=context_CYC1_512_mut#Element|Name=GuoMCB96Terminator,Type=Terminator,SubType=GuoMCB96Terminator,Strength=Strong,Orientation=plus,Sequence=TATATAACTGTCTAGAAATAAAGAGTATCATCTTTCAAA,Start=44#Barcode|Sequence=TCGTGCGACCC,Start=19,End=29,#Primer5|Sequence=GGGGACCAGGTGCCGTAAG,Start=132,End=150,#Primer3|Sequence=GCGATCCTAGGGCGATCA,Start=1,End=18,	GGGGACCAGGTGCCGTAAGGTCACGCTTACATTCACGCCCTCCTCCCACATCCGCTCTAACCGAAAAGTATATAACTGTCTAGAAATAAAGAGTATCATCTTTCAAAATTTCAAATTTTTCTCGTGCGACCCGCGATCCTAGGGCGATCA
117	117	3.546	SetName|SetName=duplicate barcodes hubs#Context|Name=context_CYC1_512_mut#Element|Name=GuoMCB96Terminator,Type=Terminator,SubType=GuoMCB96Terminator,Strength=Strong,Orientation=plus,Sequence=TATATAACTGTCTAGAAATAAAGAGTATCATCTTTCAAA,Start=51#Barcode|Sequence=CTAGAGTAGCA,Start=19,End=29,#Primer5|Sequence=GGGGACCAGGTGCCGTAAG,Start=132,End=150,#Primer3|Sequence=GCGATCCTAGGGCGATCA,Start=1,End=18,	GGGGACCAGGTGCCGTAAGGTCACGCTTACATTCACGCCCTCCTCCCACATCCGCTCTAACTATATAACTGTCTAGAAATAAAGAGTATCATCTTTCAAATATTTATATTTCAAATTTTTCCTAGAGTAGCAGCGATCCTAGGGCGATCA
118	118	1.1266	SetName|SetName=duplicate barcodes hubs#Context|Name=context_CYC1_512_mut#Element|Name=GuoMCB96Terminator,Type=Terminator,SubType=GuoMCB96Terminator,Strength=Strong,Orientation=plus,Sequence=TATATAACTGTCTAGAAATAAAGAGTATCATCTTTCAAA,Start=58#Barcode|Sequence=CGATTCTCCAA,Start=19,End=29,#Primer5|Sequence=GGGGACCAGGTGCCGTAAG,Start=132,End=150,#Primer3|Sequence=GCGATCCTAGGGCGATCA,Start=1,End=18,	GGGGACCAGGTGCCGTAAGGTCACGCTTACATTCACGCCCTCCTCCCACATCCGTATATAACTGTCTAGAAATAAAGAGTATCATCTTTCAAAAGGTCCCTATTTATATTTCAAATTTTTCCGATTCTCCAAGCGATCCTAGGGCGATCA
119	119	3.3154	SetName|SetName=duplicate barcodes hubs#Context|Name=context_CYC1_512_mut#Element|Name=GuoMCB96Terminator,Type=Terminator,SubType=GuoMCB96Terminator,Strength=Strong,Orientation=plus,Sequence=TATATAACTGTCTAGAAATAAAGAGTATCATCTTTCAAA,Start=64#Barcode|Sequence=TACCATTACCG,Start=19,End=29,#Primer5|Sequence=GGGGACCAGGTGCCGTAAG,Start=132,End=150,#Primer3|Sequence=GCGATCCTAGGGCGATCA,Start=1,End=18,	GGGGACCAGGTGCCGTAAGGTCACGCTTACATTCACGCCCTCCTCCCATATATAACTGTCTAGAAATAAAGAGTATCATCTTTCAAAAAGTCTAGGTCCCTATTTATATTTCAAATTTTTCTACCATTACCGGCGATCCTAGGGCGATCA
120	120	0.3101	SetName|SetName=duplicate barcodes hubs#Context|Name=context_CYC1_512_mut#Barcode|Sequence=ACTCCCGAAAT,Start=19,End=29,#Primer5|Sequence=GGGGACCAGGTGCCGTAAG,Start=132,End=150,#Primer3|Sequence=GCGATCCTAGGGCGATCA,Start=1,End=18,	GGGGACCAGGTGCCGTAAGGTCACGCTTACATTCACGCCCTCCTCCCACATCCGCTCTAACCGAAAAGGAAGGAGTTAGACAACCTGAAGTCTAGGTCCCTATTTATATTTCAAATTTTTCACTCCCGAAATGCGATCCTAGGGCGATCA
121	121	0.3357	SetName|SetName=duplicate barcodes hubs#Context|Name=context_CYC1_512_mut#Element|Name=GuoMCB96Terminator,Type=Terminator,SubType=GuoMCB96Terminator,Strength=Strong,Orientation=plus,Sequence=TATATAACTGTCTAGAAATAAAGAGTATCATCTTTCAAA,Start=30#Barcode|Sequence=GAACTACAATT,Start=19,End=29,#Primer5|Sequence=GGGGACCAGGTGCCGTAAG,Start=132,End=150,#Primer3|Sequence=GCGATCCTAGGGCGATCA,Start=1,End=18,	GGGGACCAGGTGCCGTAAGGTCACGCTTACATTCACGCCCTCCTCCCACATCCGCTCTAACCGAAAAGGAAGGAGTTAGACATATATAACTGTCTAGAAATAAAGAGTATCATCTTTCAAAGAACTACAATTGCGATCCTAGGGCGATCA
122	122	0.3326	SetName|SetName=duplicate barcodes hubs#Context|Name=context_CYC1_512_mut#Element|Name=GuoMCB96Terminator,Type=Terminator,SubType=GuoMCB96Terminator,Strength=Strong,Orientation=plus,Sequence=TATATAACTGTCTAGAAATAAAGAGTATCATCTTTCAAA,Start=37#Barcode|Sequence=GGTCCGCTTTG,Start=19,End=29,#Primer5|Sequence=GGGGACCAGGTGCCGTAAG,Start=132,End=150,#Primer3|Sequence=GCGATCCTAGGGCGATCA,Start=1,End=18,	GGGGACCAGGTGCCGTAAGGTCACGCTTACATTCACGCCCTCCTCCCACATCCGCTCTAACCGAAAAGGAAGGAGTATATAACTGTCTAGAAATAAAGAGTATCATCTTTCAAAATTTTTCGGTCCGCTTTGGCGATCCTAGGGCGATCA
123	123	0.7762	SetName|SetName=duplicate barcodes hubs#Context|Name=context_CYC1_512_mut#Element|Name=GuoMCB96Terminator,Type=Terminator,SubType=GuoMCB96Terminator,Strength=Strong,Orientation=plus,Sequence=TATATAACTGTCTAGAAATAAAGAGTATCATCTTTCAAA,Start=44#Barcode|Sequence=CGGCTGTCGGT,Start=19,End=29,#Primer5|Sequence=GGGGACCAGGTGCCGTAAG,Start=132,End=150,#Primer3|Sequence=GCGATCCTAGGGCGATCA,Start=1,End=18,	GGGGACCAGGTGCCGTAAGGTCACGCTTACATTCACGCCCTCCTCCCACATCCGCTCTAACCGAAAAGTATATAACTGTCTAGAAATAAAGAGTATCATCTTTCAAAATTTCAAATTTTTCCGGCTGTCGGTGCGATCCTAGGGCGATCA
124	124	3.7104	SetName|SetName=duplicate barcodes hubs#Context|Name=context_CYC1_512_mut#Element|Name=GuoMCB96Terminator,Type=Terminator,SubType=GuoMCB96Terminator,Strength=Strong,Orientation=plus,Sequence=TATATAACTGTCTAGAAATAAAGAGTATCATCTTTCAAA,Start=51#Barcode|Sequence=CACAGTTCTTC,Start=19,End=29,#Primer5|Sequence=GGGGACCAGGTGCCGTAAG,Start=132,End=150,#Primer3|Sequence=GCGATCCTAGGGCGATCA,Start=1,End=18,	GGGGACCAGGTGCCGTAAGGTCACGCTTACATTCACGCCCTCCTCCCACATCCGCTCTAACTATATAACTGTCTAGAAATAAAGAGTATCATCTTTCAAATATTTATATTTCAAATTTTTCCACAGTTCTTCGCGATCCTAGGGCGATCA
125	125	1.1597	SetName|SetName=duplicate barcodes hubs#Context|Name=context_CYC1_512_mut#Element|Name=GuoMCB96Terminator,Type=Terminator,SubType=GuoMCB96Terminator,Strength=Strong,Orientation=plus,Sequence=TATATAACTGTCTAGAAATAAAGAGTATCATCTTTCAAA,Start=58#Barcode|Sequence=ACGTAAGAAAC,Start=19,End=29,#Primer5|Sequence=GGGGACCAGGTGCCGTAAG,Start=132,End=150,#Primer3|Sequence=GCGATCCTAGGGCGATCA,Start=1,End=18,	GGGGACCAGGTGCCGTAAGGTCACGCTTACATTCACGCCCTCCTCCCACATCCGTATATAACTGTCTAGAAATAAAGAGTATCATCTTTCAAAAGGTCCCTATTTATATTTCAAATTTTTCACGTAAGAAACGCGATCCTAGGGCGATCA
126	126	1.4958	SetName|SetName=duplicate barcodes hubs#Context|Name=context_CYC1_512_mut#Element|Name=GuoMCB96Terminator,Type=Terminator,SubType=GuoMCB96Terminator,Strength=Strong,Orientation=plus,Sequence=TATATAACTGTCTAGAAATAAAGAGTATCATCTTTCAAA,Start=64#Barcode|Sequence=GTCGGTCGTTC,Start=19,End=29,#Primer5|Sequence=GGGGACCAGGTGCCGTAAG,Start=132,End=150,#Primer3|Sequence=GCGATCCTAGGGCGATCA,Start=1,End=18,	GGGGACCAGGTGCCGTAAGGTCACGCTTACATTCACGCCCTCCTCCCATATATAACTGTCTAGAAATAAAGAGTATCATCTTTCAAAAAGTCTAGGTCCCTATTTATATTTCAAATTTTTCGTCGGTCGTTCGCGATCCTAGGGCGATCA
127	127	0.2922	SetName|SetName=duplicate barcodes hubs#Context|Name=context_CYC1_512_mut#Barcode|Sequence=GCTCAGGTGTG,Start=19,End=29,#Primer5|Sequence=GGGGACCAGGTGCCGTAAG,Start=132,End=150,#Primer3|Sequence=GCGATCCTAGGGCGATCA,Start=1,End=18,	GGGGACCAGGTGCCGTAAGGTCACGCTTACATTCACGCCCTCCTCCCACATCCGCTCTAACCGAAAAGGAAGGAGTTAGACAACCTGAAGTCTAGGTCCCTATTTATATTTCAAATTTTTCGCTCAGGTGTGGCGATCCTAGGGCGATCA
128	128	0.2769	SetName|SetName=duplicate barcodes hubs#Context|Name=context_CYC1_512_mut#Element|Name=GuoMCB96Terminator,Type=Terminator,SubType=GuoMCB96Terminator,Strength=Strong,Orientation=plus,Sequence=TATATAACTGTCTAGAAATAAAGAGTATCATCTTTCAAA,Start=30#Barcode|Sequence=GCATAGGGCCG,Start=19,End=29,#Primer5|Sequence=GGGGACCAGGTGCCGTAAG,Start=132,End=150,#Primer3|Sequence=GCGATCCTAGGGCGATCA,Start=1,End=18,	GGGGACCAGGTGCCGTAAGGTCACGCTTACATTCACGCCCTCCTCCCACATCCGCTCTAACCGAAAAGGAAGGAGTTAGACATATATAACTGTCTAGAAATAAAGAGTATCATCTTTCAAAGCATAGGGCCGGCGATCCTAGGGCGATCA
129	129	0.6989	SetName|SetName=duplicate barcodes hubs#Context|Name=context_CYC1_512_mut#Element|Name=GuoMCB96Terminator,Type=Terminator,SubType=GuoMCB96Terminator,Strength=Strong,Orientation=plus,Sequence=TATATAACTGTCTAGAAATAAAGAGTATCATCTTTCAAA,Start=37#Barcode|Sequence=CTCAAGGAGCC,Start=19,End=29,#Primer5|Sequence=GGGGACCAGGTGCCGTAAG,Start=132,End=150,#Primer3|Sequence=GCGATCCTAGGGCGATCA,Start=1,End=18,	GGGGACCAGGTGCCGTAAGGTCACGCTTACATTCACGCCCTCCTCCCACATCCGCTCTAACCGAAAAGGAAGGAGTATATAACTGTCTAGAAATAAAGAGTATCATCTTTCAAAATTTTTCCTCAAGGAGCCGCGATCCTAGGGCGATCA
130	130	0.7485	SetName|SetName=duplicate barcodes hubs#Context|Name=context_CYC1_512_mut#Element|Name=GuoMCB96Terminator,Type=Terminator,SubType=GuoMCB96Terminator,Strength=Strong,Orientation=plus,Sequence=TATATAACTGTCTAGAAATAAAGAGTATCATCTTTCAAA,Start=44#Barcode|Sequence=TCACTACCAGG,Start=19,End=29,#Primer5|Sequence=GGGGACCAGGTGCCGTAAG,Start=132,End=150,#Primer3|Sequence=GCGATCCTAGGGCGATCA,Start=1,End=18,	GGGGACCAGGTGCCGTAAGGTCACGCTTACATTCACGCCCTCCTCCCACATCCGCTCTAACCGAAAAGTATATAACTGTCTAGAAATAAAGAGTATCATCTTTCAAAATTTCAAATTTTTCTCACTACCAGGGCGATCCTAGGGCGATCA
131	131	3.6863	SetName|SetName=duplicate barcodes hubs#Context|Name=context_CYC1_512_mut#Element|Name=GuoMCB96Terminator,Type=Terminator,SubType=GuoMCB96Terminator,Strength=Strong,Orientation=plus,Sequence=TATATAACTGTCTAGAAATAAAGAGTATCATCTTTCAAA,Start=51#Barcode|Sequence=ATCTTAGGCCA,Start=19,End=29,#Primer5|Sequence=GGGGACCAGGTGCCGTAAG,Start=132,End=150,#Primer3|Sequence=GCGATCCTAGGGCGATCA,Start=1,End=18,	GGGGACCAGGTGCCGTAAGGTCACGCTTACATTCACGCCCTCCTCCCACATCCGCTCTAACTATATAACTGTCTAGAAATAAAGAGTATCATCTTTCAAATATTTATATTTCAAATTTTTCATCTTAGGCCAGCGATCCTAGGGCGATCA
132	132	0.7911	SetName|SetName=duplicate barcodes hubs#Context|Name=context_CYC1_512_mut#Element|Name=GuoMCB96Terminator,Type=Terminator,SubType=GuoMCB96Terminator,Strength=Strong,Orientation=plus,Sequence=TATATAACTGTCTAGAAATAAAGAGTATCATCTTTCAAA,Start=58#Barcode|Sequence=GACGGTACATT,Start=19,End=29,#Primer5|Sequence=GGGGACCAGGTGCCGTAAG,Start=132,End=150,#Primer3|Sequence=GCGATCCTAGGGCGATCA,Start=1,End=18,	GGGGACCAGGTGCCGTAAGGTCACGCTTACATTCACGCCCTCCTCCCACATCCGTATATAACTGTCTAGAAATAAAGAGTATCATCTTTCAAAAGGTCCCTATTTATATTTCAAATTTTTCGACGGTACATTGCGATCCTAGGGCGATCA
133	133	1.0254	SetName|SetName=duplicate barcodes hubs#Context|Name=context_CYC1_512_mut#Element|Name=GuoMCB96Terminator,Type=Terminator,SubType=GuoMCB96Terminator,Strength=Strong,Orientation=plus,Sequence=TATATAACTGTCTAGAAATAAAGAGTATCATCTTTCAAA,Start=64#Barcode|Sequence=ACTGGTAAGAG,Start=19,End=29,#Primer5|Sequence=GGGGACCAGGTGCCGTAAG,Start=132,End=150,#Primer3|Sequence=GCGATCCTAGGGCGATCA,Start=1,End=18,	GGGGACCAGGTGCCGTAAGGTCACGCTTACATTCACGCCCTCCTCCCATATATAACTGTCTAGAAATAAAGAGTATCATCTTTCAAAAAGTCTAGGTCCCTATTTATATTTCAAATTTTTCACTGGTAAGAGGCGATCCTAGGGCGATCA
134	134	0.3419	SetName|SetName=duplicate barcodes hubs#Context|Name=context_CYC1_512_mut#Barcode|Sequence=CGTGTTACTGA,Start=19,End=29,#Primer5|Sequence=GGGGACCAGGTGCCGTAAG,Start=132,End=150,#Primer3|Sequence=GCGATCCTAGGGCGATCA,Start=1,End=18,	GGGGACCAGGTGCCGTAAGGTCACGCTTACATTCACGCCCTCCTCCCACATCCGCTCTAACCGAAAAGGAAGGAGTTAGACAACCTGAAGTCTAGGTCCCTATTTATATTTCAAATTTTTCCGTGTTACTGAGCGATCCTAGGGCGATCA
135	135	0.337	SetName|SetName=duplicate barcodes hubs#Context|Name=context_CYC1_512_mut#Element|Name=GuoMCB96Terminator,Type=Terminator,SubType=GuoMCB96Terminator,Strength=Strong,Orientation=plus,Sequence=TATATAACTGTCTAGAAATAAAGAGTATCATCTTTCAAA,Start=30#Barcode|Sequence=TAACTAGGACT,Start=19,End=29,#Primer5|Sequence=GGGGACCAGGTGCCGTAAG,Start=132,End=150,#Primer3|Sequence=GCGATCCTAGGGCGATCA,Start=1,End=18,	GGGGACCAGGTGCCGTAAGGTCACGCTTACATTCACGCCCTCCTCCCACATCCGCTCTAACCGAAAAGGAAGGAGTTAGACATATATAACTGTCTAGAAATAAAGAGTATCATCTTTCAAATAACTAGGACTGCGATCCTAGGGCGATCA
136	136	0.3457	SetName|SetName=duplicate barcodes hubs#Context|Name=context_CYC1_512_mut#Element|Name=GuoMCB96Terminator,Type=Terminator,SubType=GuoMCB96Terminator,Strength=Strong,Orientation=plus,Sequence=TATATAACTGTCTAGAAATAAAGAGTATCATCTTTCAAA,Start=37#Barcode|Sequence=CAGAAGGTTCG,Start=19,End=29,#Primer5|Sequence=GGGGACCAGGTGCCGTAAG,Start=132,End=150,#Primer3|Sequence=GCGATCCTAGGGCGATCA,Start=1,End=18,	GGGGACCAGGTGCCGTAAGGTCACGCTTACATTCACGCCCTCCTCCCACATCCGCTCTAACCGAAAAGGAAGGAGTATATAACTGTCTAGAAATAAAGAGTATCATCTTTCAAAATTTTTCCAGAAGGTTCGGCGATCCTAGGGCGATCA
137	137	1.3842	SetName|SetName=duplicate barcodes hubs#Context|Name=context_CYC1_512_mut#Element|Name=GuoMCB96Terminator,Type=Terminator,SubType=GuoMCB96Terminator,Strength=Strong,Orientation=plus,Sequence=TATATAACTGTCTAGAAATAAAGAGTATCATCTTTCAAA,Start=44#Barcode|Sequence=TTCTAATGCTG,Start=19,End=29,#Primer5|Sequence=GGGGACCAGGTGCCGTAAG,Start=132,End=150,#Primer3|Sequence=GCGATCCTAGGGCGATCA,Start=1,End=18,	GGGGACCAGGTGCCGTAAGGTCACGCTTACATTCACGCCCTCCTCCCACATCCGCTCTAACCGAAAAGTATATAACTGTCTAGAAATAAAGAGTATCATCTTTCAAAATTTCAAATTTTTCTTCTAATGCTGGCGATCCTAGGGCGATCA
138	138	3.1326	SetName|SetName=duplicate barcodes hubs#Context|Name=context_CYC1_512_mut#Element|Name=GuoMCB96Terminator,Type=Terminator,SubType=GuoMCB96Terminator,Strength=Strong,Orientation=plus,Sequence=TATATAACTGTCTAGAAATAAAGAGTATCATCTTTCAAA,Start=51#Barcode|Sequence=ACAGACATAGG,Start=19,End=29,#Primer5|Sequence=GGGGACCAGGTGCCGTAAG,Start=132,End=150,#Primer3|Sequence=GCGATCCTAGGGCGATCA,Start=1,End=18,	GGGGACCAGGTGCCGTAAGGTCACGCTTACATTCACGCCCTCCTCCCACATCCGCTCTAACTATATAACTGTCTAGAAATAAAGAGTATCATCTTTCAAATATTTATATTTCAAATTTTTCACAGACATAGGGCGATCCTAGGGCGATCA
139	139	1.1093	SetName|SetName=duplicate barcodes hubs#Context|Name=context_CYC1_512_mut#Element|Name=GuoMCB96Terminator,Type=Terminator,SubType=GuoMCB96Terminator,Strength=Strong,Orientation=plus,Sequence=TATATAACTGTCTAGAAATAAAGAGTATCATCTTTCAAA,Start=58#Barcode|Sequence=CAAGCGTCATT,Start=19,End=29,#Primer5|Sequence=GGGGACCAGGTGCCGTAAG,Start=132,End=150,#Primer3|Sequence=GCGATCCTAGGGCGATCA,Start=1,End=18,	GGGGACCAGGTGCCGTAAGGTCACGCTTACATTCACGCCCTCCTCCCACATCCGTATATAACTGTCTAGAAATAAAGAGTATCATCTTTCAAAAGGTCCCTATTTATATTTCAAATTTTTCCAAGCGTCATTGCGATCCTAGGGCGATCA
140	140	1.7438	SetName|SetName=duplicate barcodes hubs#Context|Name=context_CYC1_512_mut#Element|Name=GuoMCB96Terminator,Type=Terminator,SubType=GuoMCB96Terminator,Strength=Strong,Orientation=plus,Sequence=TATATAACTGTCTAGAAATAAAGAGTATCATCTTTCAAA,Start=64#Barcode|Sequence=ATCTATCCAAC,Start=19,End=29,#Primer5|Sequence=GGGGACCAGGTGCCGTAAG,Start=132,End=150,#Primer3|Sequence=GCGATCCTAGGGCGATCA,Start=1,End=18,	GGGGACCAGGTGCCGTAAGGTCACGCTTACATTCACGCCCTCCTCCCATATATAACTGTCTAGAAATAAAGAGTATCATCTTTCAAAAAGTCTAGGTCCCTATTTATATTTCAAATTTTTCATCTATCCAACGCGATCCTAGGGCGATCA
141	141	0.3237	SetName|SetName=duplicate barcodes hubs#Context|Name=context_CYC1_512_mut#Barcode|Sequence=GCCAAATACTT,Start=19,End=29,#Primer5|Sequence=GGGGACCAGGTGCCGTAAG,Start=132,End=150,#Primer3|Sequence=GCGATCCTAGGGCGATCA,Start=1,End=18,	GGGGACCAGGTGCCGTAAGGTCACGCTTACATTCACGCCCTCCTCCCACATCCGCTCTAACCGAAAAGGAAGGAGTTAGACAACCTGAAGTCTAGGTCCCTATTTATATTTCAAATTTTTCGCCAAATACTTGCGATCCTAGGGCGATCA
142	142	0.2919	SetName|SetName=duplicate barcodes hubs#Context|Name=context_CYC1_512_mut#Element|Name=GuoMCB96Terminator,Type=Terminator,SubType=GuoMCB96Terminator,Strength=Strong,Orientation=plus,Sequence=TATATAACTGTCTAGAAATAAAGAGTATCATCTTTCAAA,Start=30#Barcode|Sequence=GCTCAAGGTCA,Start=19,End=29,#Primer5|Sequence=GGGGACCAGGTGCCGTAAG,Start=132,End=150,#Primer3|Sequence=GCGATCCTAGGGCGATCA,Start=1,End=18,	GGGGACCAGGTGCCGTAAGGTCACGCTTACATTCACGCCCTCCTCCCACATCCGCTCTAACCGAAAAGGAAGGAGTTAGACATATATAACTGTCTAGAAATAAAGAGTATCATCTTTCAAAGCTCAAGGTCAGCGATCCTAGGGCGATCA
143	143	0.3762	SetName|SetName=duplicate barcodes hubs#Context|Name=context_CYC1_512_mut#Element|Name=GuoMCB96Terminator,Type=Terminator,SubType=GuoMCB96Terminator,Strength=Strong,Orientation=plus,Sequence=TATATAACTGTCTAGAAATAAAGAGTATCATCTTTCAAA,Start=37#Barcode|Sequence=CCTTTAAAGTC,Start=19,End=29,#Primer5|Sequence=GGGGACCAGGTGCCGTAAG,Start=132,End=150,#Primer3|Sequence=GCGATCCTAGGGCGATCA,Start=1,End=18,	GGGGACCAGGTGCCGTAAGGTCACGCTTACATTCACGCCCTCCTCCCACATCCGCTCTAACCGAAAAGGAAGGAGTATATAACTGTCTAGAAATAAAGAGTATCATCTTTCAAAATTTTTCCCTTTAAAGTCGCGATCCTAGGGCGATCA
144	144	0.7666	SetName|SetName=duplicate barcodes hubs#Context|Name=context_CYC1_512_mut#Element|Name=GuoMCB96Terminator,Type=Terminator,SubType=GuoMCB96Terminator,Strength=Strong,Orientation=plus,Sequence=TATATAACTGTCTAGAAATAAAGAGTATCATCTTTCAAA,Start=44#Barcode|Sequence=CTTCACTGTCA,Start=19,End=29,#Primer5|Sequence=GGGGACCAGGTGCCGTAAG,Start=132,End=150,#Primer3|Sequence=GCGATCCTAGGGCGATCA,Start=1,End=18,	GGGGACCAGGTGCCGTAAGGTCACGCTTACATTCACGCCCTCCTCCCACATCCGCTCTAACCGAAAAGTATATAACTGTCTAGAAATAAAGAGTATCATCTTTCAAAATTTCAAATTTTTCCTTCACTGTCAGCGATCCTAGGGCGATCA
145	145	4.0392	SetName|SetName=duplicate barcodes hubs#Context|Name=context_CYC1_512_mut#Element|Name=GuoMCB96Terminator,Type=Terminator,SubType=GuoMCB96Terminator,Strength=Strong,Orientation=plus,Sequence=TATATAACTGTCTAGAAATAAAGAGTATCATCTTTCAAA,Start=51#Barcode|Sequence=CTTGACATTTG,Start=19,End=29,#Primer5|Sequence=GGGGACCAGGTGCCGTAAG,Start=132,End=150,#Primer3|Sequence=GCGATCCTAGGGCGATCA,Start=1,End=18,	GGGGACCAGGTGCCGTAAGGTCACGCTTACATTCACGCCCTCCTCCCACATCCGCTCTAACTATATAACTGTCTAGAAATAAAGAGTATCATCTTTCAAATATTTATATTTCAAATTTTTCCTTGACATTTGGCGATCCTAGGGCGATCA
146	146	1.0476	SetName|SetName=duplicate barcodes hubs#Context|Name=context_CYC1_512_mut#Element|Name=GuoMCB96Terminator,Type=Terminator,SubType=GuoMCB96Terminator,Strength=Strong,Orientation=plus,Sequence=TATATAACTGTCTAGAAATAAAGAGTATCATCTTTCAAA,Start=58#Barcode|Sequence=GTGCATACTGT,Start=19,End=29,#Primer5|Sequence=GGGGACCAGGTGCCGTAAG,Start=132,End=150,#Primer3|Sequence=GCGATCCTAGGGCGATCA,Start=1,End=18,	GGGGACCAGGTGCCGTAAGGTCACGCTTACATTCACGCCCTCCTCCCACATCCGTATATAACTGTCTAGAAATAAAGAGTATCATCTTTCAAAAGGTCCCTATTTATATTTCAAATTTTTCGTGCATACTGTGCGATCCTAGGGCGATCA
147	147		SetName|SetName=duplicate barcodes hubs#Context|Name=context_CYC1_512_mut#Element|Name=GuoMCB96Terminator,Type=Terminator,SubType=GuoMCB96Terminator,Strength=Strong,Orientation=plus,Sequence=TATATAACTGTCTAGAAATAAAGAGTATCATCTTTCAAA,Start=64#Barcode|Sequence=TTAACTGTAGG,Start=19,End=29,#Primer5|Sequence=GGGGACCAGGTGCCGTAAG,Start=132,End=150,#Primer3|Sequence=GCGATCCTAGGGCGATCA,Start=1,End=18,	GGGGACCAGGTGCCGTAAGGTCACGCTTACATTCACGCCCTCCTCCCATATATAACTGTCTAGAAATAAAGAGTATCATCTTTCAAAAAGTCTAGGTCCCTATTTATATTTCAAATTTTTCTTAACTGTAGGGCGATCCTAGGGCGATCA
148	148	4.3223	SetName|SetName=duplicate barcodes hubs#Context|Name=context_CYC1_wt#Barcode|Sequence=CGTGGATCACC,Start=19,End=29,#Primer5|Sequence=GGGGACCAGGTGCCGTAAG,Start=132,End=150,#Primer3|Sequence=GCGATCCTAGGGCGATCA,Start=1,End=18,	GGGGACCAGGTGCCGTAAGACCGAAAAGGAAGGAGTTAGACAACCTGAAGTCTAGGTCCCTATTTATTTTTTTTAATAGTTATGTTAGTATTAAGAACGTTATTTATATTTCAAATTTTTCCGTGGATCACCGCGATCCTAGGGCGATCA
149	149	0.7651	SetName|SetName=duplicate barcodes hubs#Context|Name=context_CYC1_512_mut#Barcode|Sequence=TATGAGACGGT,Start=19,End=29,#Primer5|Sequence=GGGGACCAGGTGCCGTAAG,Start=132,End=150,#Primer3|Sequence=GCGATCCTAGGGCGATCA,Start=1,End=18,	GGGGACCAGGTGCCGTAAGGTCACGCTTACATTCACGCCCTCCTCCCACATCCGCTCTAACCGAAAAGGAAGGAGTTAGACAACCTGAAGTCTAGGTCCCTATTTATATTTCAAATTTTTCTATGAGACGGTGCGATCCTAGGGCGATCA
150	150	4.1281	SetName|SetName=duplicate barcodes hubs#Context|Name=context_CYC1_wt#Barcode|Sequence=ATGTGGACTGG,Start=19,End=29,#Primer5|Sequence=GGGGACCAGGTGCCGTAAG,Start=132,End=150,#Primer3|Sequence=GCGATCCTAGGGCGATCA,Start=1,End=18,	GGGGACCAGGTGCCGTAAGACCGAAAAGGAAGGAGTTAGACAACCTGAAGTCTAGGTCCCTATTTATTTTTTTTAATAGTTATGTTAGTATTAAGAACGTTATTTATATTTCAAATTTTTCATGTGGACTGGGCGATCCTAGGGCGATCA
151	151	0.304	SetName|SetName=duplicate barcodes hubs#Context|Name=context_CYC1_512_mut#Barcode|Sequence=CTTGCGTAAAC,Start=19,End=29,#Primer5|Sequence=GGGGACCAGGTGCCGTAAG,Start=132,End=150,#Primer3|Sequence=GCGATCCTAGGGCGATCA,Start=1,End=18,	GGGGACCAGGTGCCGTAAGGTCACGCTTACATTCACGCCCTCCTCCCACATCCGCTCTAACCGAAAAGGAAGGAGTTAGACAACCTGAAGTCTAGGTCCCTATTTATATTTCAAATTTTTCCTTGCGTAAACGCGATCCTAGGGCGATCA
152	152	4.1736	SetName|SetName=duplicate barcodes hubs#Context|Name=context_CYC1_wt#Barcode|Sequence=GCACTATGTGA,Start=19,End=29,#Primer5|Sequence=GGGGACCAGGTGCCGTAAG,Start=132,End=150,#Primer3|Sequence=GCGATCCTAGGGCGATCA,Start=1,End=18,	GGGGACCAGGTGCCGTAAGACCGAAAAGGAAGGAGTTAGACAACCTGAAGTCTAGGTCCCTATTTATTTTTTTTAATAGTTATGTTAGTATTAAGAACGTTATTTATATTTCAAATTTTTCGCACTATGTGAGCGATCCTAGGGCGATCA
153	153	0.3066	SetName|SetName=duplicate barcodes hubs#Context|Name=context_CYC1_512_mut#Barcode|Sequence=GTCCACTGCGC,Start=19,End=29,#Primer5|Sequence=GGGGACCAGGTGCCGTAAG,Start=132,End=150,#Primer3|Sequence=GCGATCCTAGGGCGATCA,Start=1,End=18,	GGGGACCAGGTGCCGTAAGGTCACGCTTACATTCACGCCCTCCTCCCACATCCGCTCTAACCGAAAAGGAAGGAGTTAGACAACCTGAAGTCTAGGTCCCTATTTATATTTCAAATTTTTCGTCCACTGCGCGCGATCCTAGGGCGATCA
154	154	4.2228	SetName|SetName=duplicate barcodes hubs#Context|Name=context_CYC1_wt#Barcode|Sequence=TACTGTCCAGC,Start=19,End=29,#Primer5|Sequence=GGGGACCAGGTGCCGTAAG,Start=132,End=150,#Primer3|Sequence=GCGATCCTAGGGCGATCA,Start=1,End=18,	GGGGACCAGGTGCCGTAAGACCGAAAAGGAAGGAGTTAGACAACCTGAAGTCTAGGTCCCTATTTATTTTTTTTAATAGTTATGTTAGTATTAAGAACGTTATTTATATTTCAAATTTTTCTACTGTCCAGCGCGATCCTAGGGCGATCA
155	155	0.3064	SetName|SetName=duplicate barcodes hubs#Context|Name=context_CYC1_512_mut#Barcode|Sequence=GCGTAGTGACT,Start=19,End=29,#Primer5|Sequence=GGGGACCAGGTGCCGTAAG,Start=132,End=150,#Primer3|Sequence=GCGATCCTAGGGCGATCA,Start=1,End=18,	GGGGACCAGGTGCCGTAAGGTCACGCTTACATTCACGCCCTCCTCCCACATCCGCTCTAACCGAAAAGGAAGGAGTTAGACAACCTGAAGTCTAGGTCCCTATTTATATTTCAAATTTTTCGCGTAGTGACTGCGATCCTAGGGCGATCA
156	156	4.2424	SetName|SetName=duplicate barcodes hubs#Context|Name=context_CYC1_wt#Barcode|Sequence=CTTAGTTCACT,Start=19,End=29,#Primer5|Sequence=GGGGACCAGGTGCCGTAAG,Start=132,End=150,#Primer3|Sequence=GCGATCCTAGGGCGATCA,Start=1,End=18,	GGGGACCAGGTGCCGTAAGACCGAAAAGGAAGGAGTTAGACAACCTGAAGTCTAGGTCCCTATTTATTTTTTTTAATAGTTATGTTAGTATTAAGAACGTTATTTATATTTCAAATTTTTCCTTAGTTCACTGCGATCCTAGGGCGATCA
157	157	0.3405	SetName|SetName=duplicate barcodes hubs#Context|Name=context_CYC1_512_mut#Barcode|Sequence=GAAACTACGCC,Start=19,End=29,#Primer5|Sequence=GGGGACCAGGTGCCGTAAG,Start=132,End=150,#Primer3|Sequence=GCGATCCTAGGGCGATCA,Start=1,End=18,	GGGGACCAGGTGCCGTAAGGTCACGCTTACATTCACGCCCTCCTCCCACATCCGCTCTAACCGAAAAGGAAGGAGTTAGACAACCTGAAGTCTAGGTCCCTATTTATATTTCAAATTTTTCGAAACTACGCCGCGATCCTAGGGCGATCA
158	158	4.2416	SetName|SetName=duplicate barcodes hubs#Context|Name=context_CYC1_wt#Barcode|Sequence=TCTTGGGACAC,Start=19,End=29,#Primer5|Sequence=GGGGACCAGGTGCCGTAAG,Start=132,End=150,#Primer3|Sequence=GCGATCCTAGGGCGATCA,Start=1,End=18,	GGGGACCAGGTGCCGTAAGACCGAAAAGGAAGGAGTTAGACAACCTGAAGTCTAGGTCCCTATTTATTTTTTTTAATAGTTATGTTAGTATTAAGAACGTTATTTATATTTCAAATTTTTCTCTTGGGACACGCGATCCTAGGGCGATCA
159	159	0.3332	SetName|SetName=duplicate barcodes hubs#Context|Name=context_CYC1_512_mut#Barcode|Sequence=CCCGTAATCCA,Start=19,End=29,#Primer5|Sequence=GGGGACCAGGTGCCGTAAG,Start=132,End=150,#Primer3|Sequence=GCGATCCTAGGGCGATCA,Start=1,End=18,	GGGGACCAGGTGCCGTAAGGTCACGCTTACATTCACGCCCTCCTCCCACATCCGCTCTAACCGAAAAGGAAGGAGTTAGACAACCTGAAGTCTAGGTCCCTATTTATATTTCAAATTTTTCCCCGTAATCCAGCGATCCTAGGGCGATCA
160	160	4.2361	SetName|SetName=duplicate barcodes hubs#Context|Name=context_CYC1_wt#Barcode|Sequence=GTAAACTCTGA,Start=19,End=29,#Primer5|Sequence=GGGGACCAGGTGCCGTAAG,Start=132,End=150,#Primer3|Sequence=GCGATCCTAGGGCGATCA,Start=1,End=18,	GGGGACCAGGTGCCGTAAGACCGAAAAGGAAGGAGTTAGACAACCTGAAGTCTAGGTCCCTATTTATTTTTTTTAATAGTTATGTTAGTATTAAGAACGTTATTTATATTTCAAATTTTTCGTAAACTCTGAGCGATCCTAGGGCGATCA
161	161	0.332	SetName|SetName=duplicate barcodes hubs#Context|Name=context_CYC1_512_mut#Barcode|Sequence=GAATCCCAGTT,Start=19,End=29,#Primer5|Sequence=GGGGACCAGGTGCCGTAAG,Start=132,End=150,#Primer3|Sequence=GCGATCCTAGGGCGATCA,Start=1,End=18,	GGGGACCAGGTGCCGTAAGGTCACGCTTACATTCACGCCCTCCTCCCACATCCGCTCTAACCGAAAAGGAAGGAGTTAGACAACCTGAAGTCTAGGTCCCTATTTATATTTCAAATTTTTCGAATCCCAGTTGCGATCCTAGGGCGATCA
162	162	4.3483	SetName|SetName=duplicate barcodes hubs#Context|Name=context_CYC1_wt#Barcode|Sequence=AGAGTTCTAAA,Start=19,End=29,#Primer5|Sequence=GGGGACCAGGTGCCGTAAG,Start=132,End=150,#Primer3|Sequence=GCGATCCTAGGGCGATCA,Start=1,End=18,	GGGGACCAGGTGCCGTAAGACCGAAAAGGAAGGAGTTAGACAACCTGAAGTCTAGGTCCCTATTTATTTTTTTTAATAGTTATGTTAGTATTAAGAACGTTATTTATATTTCAAATTTTTCAGAGTTCTAAAGCGATCCTAGGGCGATCA
163	163	0.3378	SetName|SetName=duplicate barcodes hubs#Context|Name=context_CYC1_512_mut#Barcode|Sequence=CCTAATGCTGC,Start=19,End=29,#Primer5|Sequence=GGGGACCAGGTGCCGTAAG,Start=132,End=150,#Primer3|Sequence=GCGATCCTAGGGCGATCA,Start=1,End=18,	GGGGACCAGGTGCCGTAAGGTCACGCTTACATTCACGCCCTCCTCCCACATCCGCTCTAACCGAAAAGGAAGGAGTTAGACAACCTGAAGTCTAGGTCCCTATTTATATTTCAAATTTTTCCCTAATGCTGCGCGATCCTAGGGCGATCA
164	164	4.2854	SetName|SetName=duplicate barcodes hubs#Context|Name=context_CYC1_wt#Barcode|Sequence=GCAACGACTCC,Start=19,End=29,#Primer5|Sequence=GGGGACCAGGTGCCGTAAG,Start=132,End=150,#Primer3|Sequence=GCGATCCTAGGGCGATCA,Start=1,End=18,	GGGGACCAGGTGCCGTAAGACCGAAAAGGAAGGAGTTAGACAACCTGAAGTCTAGGTCCCTATTTATTTTTTTTAATAGTTATGTTAGTATTAAGAACGTTATTTATATTTCAAATTTTTCGCAACGACTCCGCGATCCTAGGGCGATCA
165	165	0.3111	SetName|SetName=duplicate barcodes hubs#Context|Name=context_CYC1_512_mut#Barcode|Sequence=CTGCTAGTAGT,Start=19,End=29,#Primer5|Sequence=GGGGACCAGGTGCCGTAAG,Start=132,End=150,#Primer3|Sequence=GCGATCCTAGGGCGATCA,Start=1,End=18,	GGGGACCAGGTGCCGTAAGGTCACGCTTACATTCACGCCCTCCTCCCACATCCGCTCTAACCGAAAAGGAAGGAGTTAGACAACCTGAAGTCTAGGTCCCTATTTATATTTCAAATTTTTCCTGCTAGTAGTGCGATCCTAGGGCGATCA
166	166	4.1765	SetName|SetName=duplicate barcodes hubs#Context|Name=context_CYC1_wt#Barcode|Sequence=ACGACGCTGTA,Start=19,End=29,#Primer5|Sequence=GGGGACCAGGTGCCGTAAG,Start=132,End=150,#Primer3|Sequence=GCGATCCTAGGGCGATCA,Start=1,End=18,	GGGGACCAGGTGCCGTAAGACCGAAAAGGAAGGAGTTAGACAACCTGAAGTCTAGGTCCCTATTTATTTTTTTTAATAGTTATGTTAGTATTAAGAACGTTATTTATATTTCAAATTTTTCACGACGCTGTAGCGATCCTAGGGCGATCA
167	167	0.3313	SetName|SetName=duplicate barcodes hubs#Context|Name=context_CYC1_512_mut#Barcode|Sequence=CCTCTTGCTAC,Start=19,End=29,#Primer5|Sequence=GGGGACCAGGTGCCGTAAG,Start=132,End=150,#Primer3|Sequence=GCGATCCTAGGGCGATCA,Start=1,End=18,	GGGGACCAGGTGCCGTAAGGTCACGCTTACATTCACGCCCTCCTCCCACATCCGCTCTAACCGAAAAGGAAGGAGTTAGACAACCTGAAGTCTAGGTCCCTATTTATATTTCAAATTTTTCCCTCTTGCTACGCGATCCTAGGGCGATCA
168	168	4.1695	SetName|SetName=duplicate barcodes hubs#Context|Name=context_CYC1_wt#Barcode|Sequence=GTCATTTTGAC,Start=19,End=29,#Primer5|Sequence=GGGGACCAGGTGCCGTAAG,Start=132,End=150,#Primer3|Sequence=GCGATCCTAGGGCGATCA,Start=1,End=18,	GGGGACCAGGTGCCGTAAGACCGAAAAGGAAGGAGTTAGACAACCTGAAGTCTAGGTCCCTATTTATTTTTTTTAATAGTTATGTTAGTATTAAGAACGTTATTTATATTTCAAATTTTTCGTCATTTTGACGCGATCCTAGGGCGATCA
169	169	0.3123	SetName|SetName=duplicate barcodes hubs#Context|Name=context_CYC1_512_mut#Barcode|Sequence=AAATGCTCCTA,Start=19,End=29,#Primer5|Sequence=GGGGACCAGGTGCCGTAAG,Start=132,End=150,#Primer3|Sequence=GCGATCCTAGGGCGATCA,Start=1,End=18,	GGGGACCAGGTGCCGTAAGGTCACGCTTACATTCACGCCCTCCTCCCACATCCGCTCTAACCGAAAAGGAAGGAGTTAGACAACCTGAAGTCTAGGTCCCTATTTATATTTCAAATTTTTCAAATGCTCCTAGCGATCCTAGGGCGATCA
170	170	4.2468	SetName|SetName=duplicate barcodes hubs#Context|Name=context_CYC1_wt#Barcode|Sequence=GGCACTTTTAA,Start=19,End=29,#Primer5|Sequence=GGGGACCAGGTGCCGTAAG,Start=132,End=150,#Primer3|Sequence=GCGATCCTAGGGCGATCA,Start=1,End=18,	GGGGACCAGGTGCCGTAAGACCGAAAAGGAAGGAGTTAGACAACCTGAAGTCTAGGTCCCTATTTATTTTTTTTAATAGTTATGTTAGTATTAAGAACGTTATTTATATTTCAAATTTTTCGGCACTTTTAAGCGATCCTAGGGCGATCA
171	171	0.2986	SetName|SetName=duplicate barcodes hubs#Context|Name=context_CYC1_512_mut#Barcode|Sequence=ACCTGTAAAAT,Start=19,End=29,#Primer5|Sequence=GGGGACCAGGTGCCGTAAG,Start=132,End=150,#Primer3|Sequence=GCGATCCTAGGGCGATCA,Start=1,End=18,	GGGGACCAGGTGCCGTAAGGTCACGCTTACATTCACGCCCTCCTCCCACATCCGCTCTAACCGAAAAGGAAGGAGTTAGACAACCTGAAGTCTAGGTCCCTATTTATATTTCAAATTTTTCACCTGTAAAATGCGATCCTAGGGCGATCA
172	172	4.1637	SetName|SetName=duplicate barcodes hubs#Context|Name=context_CYC1_wt#Barcode|Sequence=CATGCCGGTCC,Start=19,End=29,#Primer5|Sequence=GGGGACCAGGTGCCGTAAG,Start=132,End=150,#Primer3|Sequence=GCGATCCTAGGGCGATCA,Start=1,End=18,	GGGGACCAGGTGCCGTAAGACCGAAAAGGAAGGAGTTAGACAACCTGAAGTCTAGGTCCCTATTTATTTTTTTTAATAGTTATGTTAGTATTAAGAACGTTATTTATATTTCAAATTTTTCCATGCCGGTCCGCGATCCTAGGGCGATCA
173	173	0.3415	SetName|SetName=duplicate barcodes hubs#Context|Name=context_CYC1_512_mut#Barcode|Sequence=ATGGGTCACGA,Start=19,End=29,#Primer5|Sequence=GGGGACCAGGTGCCGTAAG,Start=132,End=150,#Primer3|Sequence=GCGATCCTAGGGCGATCA,Start=1,End=18,	GGGGACCAGGTGCCGTAAGGTCACGCTTACATTCACGCCCTCCTCCCACATCCGCTCTAACCGAAAAGGAAGGAGTTAGACAACCTGAAGTCTAGGTCCCTATTTATATTTCAAATTTTTCATGGGTCACGAGCGATCCTAGGGCGATCA
174	174	4.3884	SetName|SetName=duplicate barcodes hubs#Context|Name=context_CYC1_wt#Barcode|Sequence=ATACCATGTTA,Start=19,End=29,#Primer5|Sequence=GGGGACCAGGTGCCGTAAG,Start=132,End=150,#Primer3|Sequence=GCGATCCTAGGGCGATCA,Start=1,End=18,	GGGGACCAGGTGCCGTAAGACCGAAAAGGAAGGAGTTAGACAACCTGAAGTCTAGGTCCCTATTTATTTTTTTTAATAGTTATGTTAGTATTAAGAACGTTATTTATATTTCAAATTTTTCATACCATGTTAGCGATCCTAGGGCGATCA
175	175	0.3026	SetName|SetName=duplicate barcodes hubs#Context|Name=context_CYC1_512_mut#Barcode|Sequence=GGGCTCTATTC,Start=19,End=29,#Primer5|Sequence=GGGGACCAGGTGCCGTAAG,Start=132,End=150,#Primer3|Sequence=GCGATCCTAGGGCGATCA,Start=1,End=18,	GGGGACCAGGTGCCGTAAGGTCACGCTTACATTCACGCCCTCCTCCCACATCCGCTCTAACCGAAAAGGAAGGAGTTAGACAACCTGAAGTCTAGGTCCCTATTTATATTTCAAATTTTTCGGGCTCTATTCGCGATCCTAGGGCGATCA
176	176	4.3865	SetName|SetName=duplicate barcodes hubs#Context|Name=context_CYC1_wt#Barcode|Sequence=GGTCGGTTAGC,Start=19,End=29,#Primer5|Sequence=GGGGACCAGGTGCCGTAAG,Start=132,End=150,#Primer3|Sequence=GCGATCCTAGGGCGATCA,Start=1,End=18,	GGGGACCAGGTGCCGTAAGACCGAAAAGGAAGGAGTTAGACAACCTGAAGTCTAGGTCCCTATTTATTTTTTTTAATAGTTATGTTAGTATTAAGAACGTTATTTATATTTCAAATTTTTCGGTCGGTTAGCGCGATCCTAGGGCGATCA
177	177	0.2912	SetName|SetName=duplicate barcodes hubs#Context|Name=context_CYC1_512_mut#Barcode|Sequence=TTGGGAGCTCA,Start=19,End=29,#Primer5|Sequence=GGGGACCAGGTGCCGTAAG,Start=132,End=150,#Primer3|Sequence=GCGATCCTAGGGCGATCA,Start=1,End=18,	GGGGACCAGGTGCCGTAAGGTCACGCTTACATTCACGCCCTCCTCCCACATCCGCTCTAACCGAAAAGGAAGGAGTTAGACAACCTGAAGTCTAGGTCCCTATTTATATTTCAAATTTTTCTTGGGAGCTCAGCGATCCTAGGGCGATCA
178	178	4.0634	SetName|SetName=duplicate barcodes hubs#Context|Name=context_CYC1_wt#Barcode|Sequence=TGATTTGGCCG,Start=19,End=29,#Primer5|Sequence=GGGGACCAGGTGCCGTAAG,Start=132,End=150,#Primer3|Sequence=GCGATCCTAGGGCGATCA,Start=1,End=18,	GGGGACCAGGTGCCGTAAGACCGAAAAGGAAGGAGTTAGACAACCTGAAGTCTAGGTCCCTATTTATTTTTTTTAATAGTTATGTTAGTATTAAGAACGTTATTTATATTTCAAATTTTTCTGATTTGGCCGGCGATCCTAGGGCGATCA
179	179	0.3382	SetName|SetName=duplicate barcodes hubs#Context|Name=context_CYC1_512_mut#Barcode|Sequence=AGGTGATTCGC,Start=19,End=29,#Primer5|Sequence=GGGGACCAGGTGCCGTAAG,Start=132,End=150,#Primer3|Sequence=GCGATCCTAGGGCGATCA,Start=1,End=18,	GGGGACCAGGTGCCGTAAGGTCACGCTTACATTCACGCCCTCCTCCCACATCCGCTCTAACCGAAAAGGAAGGAGTTAGACAACCTGAAGTCTAGGTCCCTATTTATATTTCAAATTTTTCAGGTGATTCGCGCGATCCTAGGGCGATCA
180	180	4.1515	SetName|SetName=duplicate barcodes hubs#Context|Name=context_CYC1_wt#Barcode|Sequence=GAGTAACCTAT,Start=19,End=29,#Primer5|Sequence=GGGGACCAGGTGCCGTAAG,Start=132,End=150,#Primer3|Sequence=GCGATCCTAGGGCGATCA,Start=1,End=18,	GGGGACCAGGTGCCGTAAGACCGAAAAGGAAGGAGTTAGACAACCTGAAGTCTAGGTCCCTATTTATTTTTTTTAATAGTTATGTTAGTATTAAGAACGTTATTTATATTTCAAATTTTTCGAGTAACCTATGCGATCCTAGGGCGATCA
181	181	0.3062	SetName|SetName=duplicate barcodes hubs#Context|Name=context_CYC1_512_mut#Barcode|Sequence=GGACTCGGTTC,Start=19,End=29,#Primer5|Sequence=GGGGACCAGGTGCCGTAAG,Start=132,End=150,#Primer3|Sequence=GCGATCCTAGGGCGATCA,Start=1,End=18,	GGGGACCAGGTGCCGTAAGGTCACGCTTACATTCACGCCCTCCTCCCACATCCGCTCTAACCGAAAAGGAAGGAGTTAGACAACCTGAAGTCTAGGTCCCTATTTATATTTCAAATTTTTCGGACTCGGTTCGCGATCCTAGGGCGATCA
182	182	4.4528	SetName|SetName=duplicate barcodes hubs#Context|Name=context_CYC1_wt#Barcode|Sequence=GACTGCTACGT,Start=19,End=29,#Primer5|Sequence=GGGGACCAGGTGCCGTAAG,Start=132,End=150,#Primer3|Sequence=GCGATCCTAGGGCGATCA,Start=1,End=18,	GGGGACCAGGTGCCGTAAGACCGAAAAGGAAGGAGTTAGACAACCTGAAGTCTAGGTCCCTATTTATTTTTTTTAATAGTTATGTTAGTATTAAGAACGTTATTTATATTTCAAATTTTTCGACTGCTACGTGCGATCCTAGGGCGATCA
183	183	0.3247	SetName|SetName=duplicate barcodes hubs#Context|Name=context_CYC1_512_mut#Barcode|Sequence=AACGTTAGCTA,Start=19,End=29,#Primer5|Sequence=GGGGACCAGGTGCCGTAAG,Start=132,End=150,#Primer3|Sequence=GCGATCCTAGGGCGATCA,Start=1,End=18,	GGGGACCAGGTGCCGTAAGGTCACGCTTACATTCACGCCCTCCTCCCACATCCGCTCTAACCGAAAAGGAAGGAGTTAGACAACCTGAAGTCTAGGTCCCTATTTATATTTCAAATTTTTCAACGTTAGCTAGCGATCCTAGGGCGATCA
184	184	4.4444	SetName|SetName=duplicate barcodes hubs#Context|Name=context_CYC1_wt#Barcode|Sequence=CATTTGAGTGT,Start=19,End=29,#Primer5|Sequence=GGGGACCAGGTGCCGTAAG,Start=132,End=150,#Primer3|Sequence=GCGATCCTAGGGCGATCA,Start=1,End=18,	GGGGACCAGGTGCCGTAAGACCGAAAAGGAAGGAGTTAGACAACCTGAAGTCTAGGTCCCTATTTATTTTTTTTAATAGTTATGTTAGTATTAAGAACGTTATTTATATTTCAAATTTTTCCATTTGAGTGTGCGATCCTAGGGCGATCA
185	185	0.3301	SetName|SetName=duplicate barcodes hubs#Context|Name=context_CYC1_512_mut#Barcode|Sequence=TGGTTGACAGG,Start=19,End=29,#Primer5|Sequence=GGGGACCAGGTGCCGTAAG,Start=132,End=150,#Primer3|Sequence=GCGATCCTAGGGCGATCA,Start=1,End=18,	GGGGACCAGGTGCCGTAAGGTCACGCTTACATTCACGCCCTCCTCCCACATCCGCTCTAACCGAAAAGGAAGGAGTTAGACAACCTGAAGTCTAGGTCCCTATTTATATTTCAAATTTTTCTGGTTGACAGGGCGATCCTAGGGCGATCA
186	186	4.25	SetName|SetName=duplicate barcodes hubs#Context|Name=context_CYC1_wt#Barcode|Sequence=CCACCAGCTTG,Start=19,End=29,#Primer5|Sequence=GGGGACCAGGTGCCGTAAG,Start=132,End=150,#Primer3|Sequence=GCGATCCTAGGGCGATCA,Start=1,End=18,	GGGGACCAGGTGCCGTAAGACCGAAAAGGAAGGAGTTAGACAACCTGAAGTCTAGGTCCCTATTTATTTTTTTTAATAGTTATGTTAGTATTAAGAACGTTATTTATATTTCAAATTTTTCCCACCAGCTTGGCGATCCTAGGGCGATCA
187	187	0.318	SetName|SetName=duplicate barcodes hubs#Context|Name=context_CYC1_512_mut#Barcode|Sequence=TTGAGTGTTCA,Start=19,End=29,#Primer5|Sequence=GGGGACCAGGTGCCGTAAG,Start=132,End=150,#Primer3|Sequence=GCGATCCTAGGGCGATCA,Start=1,End=18,	GGGGACCAGGTGCCGTAAGGTCACGCTTACATTCACGCCCTCCTCCCACATCCGCTCTAACCGAAAAGGAAGGAGTTAGACAACCTGAAGTCTAGGTCCCTATTTATATTTCAAATTTTTCTTGAGTGTTCAGCGATCCTAGGGCGATCA
188	188	0.3117	SetName|SetName=duplicate barcodes hubs#Context|Name=context_term_null_YGR062C#Barcode|Sequence=ATTGACCCGTA,Start=19,End=29,#Primer5|Sequence=GGGGACCAGGTGCCGTAAG,Start=132,End=150,#Primer3|Sequence=GCGATCCTAGGGCGATCA,Start=1,End=18,	GGGGACCAGGTGCCGTAAGGTGAAGCTGACGCATAGATAGGAATTCTACATCAGCTTGTACAAAAATGACTTTCAATATCCTTCAACCGTTCCTGACTCTTTCCTGCTGACCCGTTTTTCCATTGACCCGTAGCGATCCTAGGGCGATCA
189	189		SetName|SetName=duplicate barcodes hubs#Context|Name=context_term_null_YDR286C#Barcode|Sequence=TCGCACAAAAT,Start=19,End=29,#Primer5|Sequence=GGGGACCAGGTGCCGTAAG,Start=132,End=150,#Primer3|Sequence=GCGATCCTAGGGCGATCA,Start=1,End=18,	GGGGACCAGGTGCCGTAAGCCTCTTTTGTTTTTACTAGAGTTACAACACTGTAAATATTTATAAGCTATGAATAAGCCTCCTATATCTACGCTAATTTTACTATGCATACTTCTTACGCAGTCGCACAAAATGCGATCCTAGGGCGATCA
190	190	0.9969	SetName|SetName=duplicate barcodes hubs#Context|Name=context_term_null_YJL095W#Barcode|Sequence=GAAAATCGTGC,Start=19,End=29,#Primer5|Sequence=GGGGACCAGGTGCCGTAAG,Start=132,End=150,#Primer3|Sequence=GCGATCCTAGGGCGATCA,Start=1,End=18,	GGGGACCAGGTGCCGTAAGGCTATTAGGATCGATCTATACTTAAGATATTTATGCAATAATATAGAACCATAGATGACGGAATGACGGAATGACTGAAAATTAAGAACAAAGAAAATTAAAGAAAATCGTGCGCGATCCTAGGGCGATCA
191	191	2.3983	SetName|SetName=duplicate barcodes hubs#Context|Name=context_term_null_YLR044C#Barcode|Sequence=CGTAAACGTTG,Start=19,End=29,#Primer5|Sequence=GGGGACCAGGTGCCGTAAG,Start=132,End=150,#Primer3|Sequence=GCGATCCTAGGGCGATCA,Start=1,End=18,	GGGGACCAGGTGCCGTAAGGCGATTTAATCTCTAATTATTAGTTAAAGTTTTATAAGCATTTTACGAAATTGGTTCATATTATTACTGCACTGTCACTTACCATGGAAAGACCAGACAAGACGTAAACGTTGGCGATCCTAGGGCGATCA
192	192	0.322	SetName|SetName=duplicate barcodes hubs#Context|Name=context_term_null_YGR062C#Barcode|Sequence=CCCAGACTTGG,Start=19,End=29,#Primer5|Sequence=GGGGACCAGGTGCCGTAAG,Start=132,End=150,#Primer3|Sequence=GCGATCCTAGGGCGATCA,Start=1,End=18,	GGGGACCAGGTGCCGTAAGGTGAAGCTGACGCATAGATAGGAATTCTACATCAGCTTGTACAAAAATGACTTTCAATATCCTTCAACCGTTCCTGACTCTTTCCTGCTGACCCGTTTTTCCCCCAGACTTGGGCGATCCTAGGGCGATCA
193	193	2.6144	SetName|SetName=duplicate barcodes hubs#Context|Name=context_term_null_YDR286C#Barcode|Sequence=AGACAAGATAG,Start=19,End=29,#Primer5|Sequence=GGGGACCAGGTGCCGTAAG,Start=132,End=150,#Primer3|Sequence=GCGATCCTAGGGCGATCA,Start=1,End=18,	GGGGACCAGGTGCCGTAAGCCTCTTTTGTTTTTACTAGAGTTACAACACTGTAAATATTTATAAGCTATGAATAAGCCTCCTATATCTACGCTAATTTTACTATGCATACTTCTTACGCAGAGACAAGATAGGCGATCCTAGGGCGATCA
194	194	0.9517	SetName|SetName=duplicate barcodes hubs#Context|Name=context_term_null_YJL095W#Barcode|Sequence=TTTGTAATGTC,Start=19,End=29,#Primer5|Sequence=GGGGACCAGGTGCCGTAAG,Start=132,End=150,#Primer3|Sequence=GCGATCCTAGGGCGATCA,Start=1,End=18,	GGGGACCAGGTGCCGTAAGGCTATTAGGATCGATCTATACTTAAGATATTTATGCAATAATATAGAACCATAGATGACGGAATGACGGAATGACTGAAAATTAAGAACAAAGAAAATTAAATTTGTAATGTCGCGATCCTAGGGCGATCA
195	195	3.0514	SetName|SetName=duplicate barcodes hubs#Context|Name=context_term_null_YLR044C#Barcode|Sequence=CCTTAGGGATC,Start=19,End=29,#Primer5|Sequence=GGGGACCAGGTGCCGTAAG,Start=132,End=150,#Primer3|Sequence=GCGATCCTAGGGCGATCA,Start=1,End=18,	GGGGACCAGGTGCCGTAAGGCGATTTAATCTCTAATTATTAGTTAAAGTTTTATAAGCATTTTACGAAATTGGTTCATATTATTACTGCACTGTCACTTACCATGGAAAGACCAGACAAGACCTTAGGGATCGCGATCCTAGGGCGATCA
196	196	0.3625	SetName|SetName=duplicate barcodes hubs#Context|Name=context_term_null_YGR062C#Barcode|Sequence=ACCCGCTAAGT,Start=19,End=29,#Primer5|Sequence=GGGGACCAGGTGCCGTAAG,Start=132,End=150,#Primer3|Sequence=GCGATCCTAGGGCGATCA,Start=1,End=18,	GGGGACCAGGTGCCGTAAGGTGAAGCTGACGCATAGATAGGAATTCTACATCAGCTTGTACAAAAATGACTTTCAATATCCTTCAACCGTTCCTGACTCTTTCCTGCTGACCCGTTTTTCCACCCGCTAAGTGCGATCCTAGGGCGATCA
197	197	2.6538	SetName|SetName=duplicate barcodes hubs#Context|Name=context_term_null_YDR286C#Barcode|Sequence=GAACGAACTCT,Start=19,End=29,#Primer5|Sequence=GGGGACCAGGTGCCGTAAG,Start=132,End=150,#Primer3|Sequence=GCGATCCTAGGGCGATCA,Start=1,End=18,	GGGGACCAGGTGCCGTAAGCCTCTTTTGTTTTTACTAGAGTTACAACACTGTAAATATTTATAAGCTATGAATAAGCCTCCTATATCTACGCTAATTTTACTATGCATACTTCTTACGCAGGAACGAACTCTGCGATCCTAGGGCGATCA
198	198	0.8836	SetName|SetName=duplicate barcodes hubs#Context|Name=context_term_null_YJL095W#Barcode|Sequence=ACGTTACGCTG,Start=19,End=29,#Primer5|Sequence=GGGGACCAGGTGCCGTAAG,Start=132,End=150,#Primer3|Sequence=GCGATCCTAGGGCGATCA,Start=1,End=18,	GGGGACCAGGTGCCGTAAGGCTATTAGGATCGATCTATACTTAAGATATTTATGCAATAATATAGAACCATAGATGACGGAATGACGGAATGACTGAAAATTAAGAACAAAGAAAATTAAAACGTTACGCTGGCGATCCTAGGGCGATCA
199	199	3.081	SetName|SetName=duplicate barcodes hubs#Context|Name=context_term_null_YLR044C#Barcode|Sequence=TGTCCGGTTTA,Start=19,End=29,#Primer5|Sequence=GGGGACCAGGTGCCGTAAG,Start=132,End=150,#Primer3|Sequence=GCGATCCTAGGGCGATCA,Start=1,End=18,	GGGGACCAGGTGCCGTAAGGCGATTTAATCTCTAATTATTAGTTAAAGTTTTATAAGCATTTTACGAAATTGGTTCATATTATTACTGCACTGTCACTTACCATGGAAAGACCAGACAAGATGTCCGGTTTAGCGATCCTAGGGCGATCA
200	200	0.4795	SetName|SetName=duplicate barcodes hubs#Context|Name=context_term_null_YGR062C#Barcode|Sequence=GCTGCCACGTC,Start=19,End=29,#Primer5|Sequence=GGGGACCAGGTGCCGTAAG,Start=132,End=150,#Primer3|Sequence=GCGATCCTAGGGCGATCA,Start=1,End=18,	GGGGACCAGGTGCCGTAAGGTGAAGCTGACGCATAGATAGGAATTCTACATCAGCTTGTACAAAAATGACTTTCAATATCCTTCAACCGTTCCTGACTCTTTCCTGCTGACCCGTTTTTCCGCTGCCACGTCGCGATCCTAGGGCGATCA
201	201	3.2487	SetName|SetName=duplicate barcodes hubs#Context|Name=context_term_null_YDR286C#Barcode|Sequence=CACAGTCTCTC,Start=19,End=29,#Primer5|Sequence=GGGGACCAGGTGCCGTAAG,Start=132,End=150,#Primer3|Sequence=GCGATCCTAGGGCGATCA,Start=1,End=18,	GGGGACCAGGTGCCGTAAGCCTCTTTTGTTTTTACTAGAGTTACAACACTGTAAATATTTATAAGCTATGAATAAGCCTCCTATATCTACGCTAATTTTACTATGCATACTTCTTACGCAGCACAGTCTCTCGCGATCCTAGGGCGATCA
202	202	0.7229	SetName|SetName=duplicate barcodes hubs#Context|Name=context_term_null_YJL095W#Barcode|Sequence=GATCTCTTTAG,Start=19,End=29,#Primer5|Sequence=GGGGACCAGGTGCCGTAAG,Start=132,End=150,#Primer3|Sequence=GCGATCCTAGGGCGATCA,Start=1,End=18,	GGGGACCAGGTGCCGTAAGGCTATTAGGATCGATCTATACTTAAGATATTTATGCAATAATATAGAACCATAGATGACGGAATGACGGAATGACTGAAAATTAAGAACAAAGAAAATTAAAGATCTCTTTAGGCGATCCTAGGGCGATCA
203	203	2.8037	SetName|SetName=duplicate barcodes hubs#Context|Name=context_term_null_YLR044C#Barcode|Sequence=TACCAGGCCCA,Start=19,End=29,#Primer5|Sequence=GGGGACCAGGTGCCGTAAG,Start=132,End=150,#Primer3|Sequence=GCGATCCTAGGGCGATCA,Start=1,End=18,	GGGGACCAGGTGCCGTAAGGCGATTTAATCTCTAATTATTAGTTAAAGTTTTATAAGCATTTTACGAAATTGGTTCATATTATTACTGCACTGTCACTTACCATGGAAAGACCAGACAAGATACCAGGCCCAGCGATCCTAGGGCGATCA
204	204	0.3076	SetName|SetName=duplicate barcodes hubs#Context|Name=context_term_null_YGR062C#Barcode|Sequence=TCAAACCGCAT,Start=19,End=29,#Primer5|Sequence=GGGGACCAGGTGCCGTAAG,Start=132,End=150,#Primer3|Sequence=GCGATCCTAGGGCGATCA,Start=1,End=18,	GGGGACCAGGTGCCGTAAGGTGAAGCTGACGCATAGATAGGAATTCTACATCAGCTTGTACAAAAATGACTTTCAATATCCTTCAACCGTTCCTGACTCTTTCCTGCTGACCCGTTTTTCCTCAAACCGCATGCGATCCTAGGGCGATCA
205	205	3.5297	SetName|SetName=duplicate barcodes hubs#Context|Name=context_term_null_YDR286C#Barcode|Sequence=AATGAGCCTTC,Start=19,End=29,#Primer5|Sequence=GGGGACCAGGTGCCGTAAG,Start=132,End=150,#Primer3|Sequence=GCGATCCTAGGGCGATCA,Start=1,End=18,	GGGGACCAGGTGCCGTAAGCCTCTTTTGTTTTTACTAGAGTTACAACACTGTAAATATTTATAAGCTATGAATAAGCCTCCTATATCTACGCTAATTTTACTATGCATACTTCTTACGCAGAATGAGCCTTCGCGATCCTAGGGCGATCA
206	206	1.1964	SetName|SetName=duplicate barcodes hubs#Context|Name=context_term_null_YJL095W#Barcode|Sequence=GCTTAGTTGCC,Start=19,End=29,#Primer5|Sequence=GGGGACCAGGTGCCGTAAG,Start=132,End=150,#Primer3|Sequence=GCGATCCTAGGGCGATCA,Start=1,End=18,	GGGGACCAGGTGCCGTAAGGCTATTAGGATCGATCTATACTTAAGATATTTATGCAATAATATAGAACCATAGATGACGGAATGACGGAATGACTGAAAATTAAGAACAAAGAAAATTAAAGCTTAGTTGCCGCGATCCTAGGGCGATCA
207	207	2.1884	SetName|SetName=duplicate barcodes hubs#Context|Name=context_term_null_YLR044C#Barcode|Sequence=TGGACCAAACA,Start=19,End=29,#Primer5|Sequence=GGGGACCAGGTGCCGTAAG,Start=132,End=150,#Primer3|Sequence=GCGATCCTAGGGCGATCA,Start=1,End=18,	GGGGACCAGGTGCCGTAAGGCGATTTAATCTCTAATTATTAGTTAAAGTTTTATAAGCATTTTACGAAATTGGTTCATATTATTACTGCACTGTCACTTACCATGGAAAGACCAGACAAGATGGACCAAACAGCGATCCTAGGGCGATCA
208	208	0.3238	SetName|SetName=duplicate barcodes hubs#Context|Name=context_term_null_YGR062C#Barcode|Sequence=AGTTAGCACTG,Start=19,End=29,#Primer5|Sequence=GGGGACCAGGTGCCGTAAG,Start=132,End=150,#Primer3|Sequence=GCGATCCTAGGGCGATCA,Start=1,End=18,	GGGGACCAGGTGCCGTAAGGTGAAGCTGACGCATAGATAGGAATTCTACATCAGCTTGTACAAAAATGACTTTCAATATCCTTCAACCGTTCCTGACTCTTTCCTGCTGACCCGTTTTTCCAGTTAGCACTGGCGATCCTAGGGCGATCA
209	209	3.194	SetName|SetName=duplicate barcodes hubs#Context|Name=context_term_null_YDR286C#Barcode|Sequence=TACTGCAGACC,Start=19,End=29,#Primer5|Sequence=GGGGACCAGGTGCCGTAAG,Start=132,End=150,#Primer3|Sequence=GCGATCCTAGGGCGATCA,Start=1,End=18,	GGGGACCAGGTGCCGTAAGCCTCTTTTGTTTTTACTAGAGTTACAACACTGTAAATATTTATAAGCTATGAATAAGCCTCCTATATCTACGCTAATTTTACTATGCATACTTCTTACGCAGTACTGCAGACCGCGATCCTAGGGCGATCA
210	210	1.0574	SetName|SetName=duplicate barcodes hubs#Context|Name=context_term_null_YJL095W#Barcode|Sequence=CCTCGCAAGTA,Start=19,End=29,#Primer5|Sequence=GGGGACCAGGTGCCGTAAG,Start=132,End=150,#Primer3|Sequence=GCGATCCTAGGGCGATCA,Start=1,End=18,	GGGGACCAGGTGCCGTAAGGCTATTAGGATCGATCTATACTTAAGATATTTATGCAATAATATAGAACCATAGATGACGGAATGACGGAATGACTGAAAATTAAGAACAAAGAAAATTAAACCTCGCAAGTAGCGATCCTAGGGCGATCA
211	211	2.5259	SetName|SetName=duplicate barcodes hubs#Context|Name=context_term_null_YLR044C#Barcode|Sequence=GGAGCTTCACC,Start=19,End=29,#Primer5|Sequence=GGGGACCAGGTGCCGTAAG,Start=132,End=150,#Primer3|Sequence=GCGATCCTAGGGCGATCA,Start=1,End=18,	GGGGACCAGGTGCCGTAAGGCGATTTAATCTCTAATTATTAGTTAAAGTTTTATAAGCATTTTACGAAATTGGTTCATATTATTACTGCACTGTCACTTACCATGGAAAGACCAGACAAGAGGAGCTTCACCGCGATCCTAGGGCGATCA
212	212	0.6836	SetName|SetName=duplicate barcodes hubs#Context|Name=context_term_null_YGR062C#Barcode|Sequence=AGGTAACGCAC,Start=19,End=29,#Primer5|Sequence=GGGGACCAGGTGCCGTAAG,Start=132,End=150,#Primer3|Sequence=GCGATCCTAGGGCGATCA,Start=1,End=18,	GGGGACCAGGTGCCGTAAGGTGAAGCTGACGCATAGATAGGAATTCTACATCAGCTTGTACAAAAATGACTTTCAATATCCTTCAACCGTTCCTGACTCTTTCCTGCTGACCCGTTTTTCCAGGTAACGCACGCGATCCTAGGGCGATCA
213	213	3.1652	SetName|SetName=duplicate barcodes hubs#Context|Name=context_term_null_YDR286C#Barcode|Sequence=ATCCACACTTA,Start=19,End=29,#Primer5|Sequence=GGGGACCAGGTGCCGTAAG,Start=132,End=150,#Primer3|Sequence=GCGATCCTAGGGCGATCA,Start=1,End=18,	GGGGACCAGGTGCCGTAAGCCTCTTTTGTTTTTACTAGAGTTACAACACTGTAAATATTTATAAGCTATGAATAAGCCTCCTATATCTACGCTAATTTTACTATGCATACTTCTTACGCAGATCCACACTTAGCGATCCTAGGGCGATCA
214	214	0.6687	SetName|SetName=duplicate barcodes hubs#Context|Name=context_term_null_YJL095W#Barcode|Sequence=GGTACTCAGTC,Start=19,End=29,#Primer5|Sequence=GGGGACCAGGTGCCGTAAG,Start=132,End=150,#Primer3|Sequence=GCGATCCTAGGGCGATCA,Start=1,End=18,	GGGGACCAGGTGCCGTAAGGCTATTAGGATCGATCTATACTTAAGATATTTATGCAATAATATAGAACCATAGATGACGGAATGACGGAATGACTGAAAATTAAGAACAAAGAAAATTAAAGGTACTCAGTCGCGATCCTAGGGCGATCA
215	215	2.5	SetName|SetName=duplicate barcodes hubs#Context|Name=context_term_null_YLR044C#Barcode|Sequence=CATGAGACTAT,Start=19,End=29,#Primer5|Sequence=GGGGACCAGGTGCCGTAAG,Start=132,End=150,#Primer3|Sequence=GCGATCCTAGGGCGATCA,Start=1,End=18,	GGGGACCAGGTGCCGTAAGGCGATTTAATCTCTAATTATTAGTTAAAGTTTTATAAGCATTTTACGAAATTGGTTCATATTATTACTGCACTGTCACTTACCATGGAAAGACCAGACAAGACATGAGACTATGCGATCCTAGGGCGATCA
216	216	0.3354	SetName|SetName=duplicate barcodes hubs#Context|Name=context_term_null_YGR062C#Barcode|Sequence=TACACGTACTA,Start=19,End=29,#Primer5|Sequence=GGGGACCAGGTGCCGTAAG,Start=132,End=150,#Primer3|Sequence=GCGATCCTAGGGCGATCA,Start=1,End=18,	GGGGACCAGGTGCCGTAAGGTGAAGCTGACGCATAGATAGGAATTCTACATCAGCTTGTACAAAAATGACTTTCAATATCCTTCAACCGTTCCTGACTCTTTCCTGCTGACCCGTTTTTCCTACACGTACTAGCGATCCTAGGGCGATCA
217	217	3.13	SetName|SetName=duplicate barcodes hubs#Context|Name=context_term_null_YDR286C#Barcode|Sequence=ATGCCCACTGA,Start=19,End=29,#Primer5|Sequence=GGGGACCAGGTGCCGTAAG,Start=132,End=150,#Primer3|Sequence=GCGATCCTAGGGCGATCA,Start=1,End=18,	GGGGACCAGGTGCCGTAAGCCTCTTTTGTTTTTACTAGAGTTACAACACTGTAAATATTTATAAGCTATGAATAAGCCTCCTATATCTACGCTAATTTTACTATGCATACTTCTTACGCAGATGCCCACTGAGCGATCCTAGGGCGATCA
218	218	1.1502	SetName|SetName=duplicate barcodes hubs#Context|Name=context_term_null_YJL095W#Barcode|Sequence=ACACAGAGTCG,Start=19,End=29,#Primer5|Sequence=GGGGACCAGGTGCCGTAAG,Start=132,End=150,#Primer3|Sequence=GCGATCCTAGGGCGATCA,Start=1,End=18,	GGGGACCAGGTGCCGTAAGGCTATTAGGATCGATCTATACTTAAGATATTTATGCAATAATATAGAACCATAGATGACGGAATGACGGAATGACTGAAAATTAAGAACAAAGAAAATTAAAACACAGAGTCGGCGATCCTAGGGCGATCA
219	219	2.8214	SetName|SetName=duplicate barcodes hubs#Context|Name=context_term_null_YLR044C#Barcode|Sequence=GCTTACCATTG,Start=19,End=29,#Primer5|Sequence=GGGGACCAGGTGCCGTAAG,Start=132,End=150,#Primer3|Sequence=GCGATCCTAGGGCGATCA,Start=1,End=18,	GGGGACCAGGTGCCGTAAGGCGATTTAATCTCTAATTATTAGTTAAAGTTTTATAAGCATTTTACGAAATTGGTTCATATTATTACTGCACTGTCACTTACCATGGAAAGACCAGACAAGAGCTTACCATTGGCGATCCTAGGGCGATCA
220	220	0.3683	SetName|SetName=duplicate barcodes hubs#Context|Name=context_term_null_YGR062C#Barcode|Sequence=AGACGCAGCCA,Start=19,End=29,#Primer5|Sequence=GGGGACCAGGTGCCGTAAG,Start=132,End=150,#Primer3|Sequence=GCGATCCTAGGGCGATCA,Start=1,End=18,	GGGGACCAGGTGCCGTAAGGTGAAGCTGACGCATAGATAGGAATTCTACATCAGCTTGTACAAAAATGACTTTCAATATCCTTCAACCGTTCCTGACTCTTTCCTGCTGACCCGTTTTTCCAGACGCAGCCAGCGATCCTAGGGCGATCA
221	221	2.5657	SetName|SetName=duplicate barcodes hubs#Context|Name=context_term_null_YDR286C#Barcode|Sequence=GTGGACGATCT,Start=19,End=29,#Primer5|Sequence=GGGGACCAGGTGCCGTAAG,Start=132,End=150,#Primer3|Sequence=GCGATCCTAGGGCGATCA,Start=1,End=18,	GGGGACCAGGTGCCGTAAGCCTCTTTTGTTTTTACTAGAGTTACAACACTGTAAATATTTATAAGCTATGAATAAGCCTCCTATATCTACGCTAATTTTACTATGCATACTTCTTACGCAGGTGGACGATCTGCGATCCTAGGGCGATCA
222	222	0.875	SetName|SetName=duplicate barcodes hubs#Context|Name=context_term_null_YJL095W#Barcode|Sequence=GGTAGTCGAGC,Start=19,End=29,#Primer5|Sequence=GGGGACCAGGTGCCGTAAG,Start=132,End=150,#Primer3|Sequence=GCGATCCTAGGGCGATCA,Start=1,End=18,	GGGGACCAGGTGCCGTAAGGCTATTAGGATCGATCTATACTTAAGATATTTATGCAATAATATAGAACCATAGATGACGGAATGACGGAATGACTGAAAATTAAGAACAAAGAAAATTAAAGGTAGTCGAGCGCGATCCTAGGGCGATCA
223	223	2.8716	SetName|SetName=duplicate barcodes hubs#Context|Name=context_term_null_YLR044C#Barcode|Sequence=AGGGCGCAATA,Start=19,End=29,#Primer5|Sequence=GGGGACCAGGTGCCGTAAG,Start=132,End=150,#Primer3|Sequence=GCGATCCTAGGGCGATCA,Start=1,End=18,	GGGGACCAGGTGCCGTAAGGCGATTTAATCTCTAATTATTAGTTAAAGTTTTATAAGCATTTTACGAAATTGGTTCATATTATTACTGCACTGTCACTTACCATGGAAAGACCAGACAAGAAGGGCGCAATAGCGATCCTAGGGCGATCA
224	224	0.3381	SetName|SetName=duplicate barcodes hubs#Context|Name=context_term_null_YGR062C#Barcode|Sequence=CTCTTGGACCC,Start=19,End=29,#Primer5|Sequence=GGGGACCAGGTGCCGTAAG,Start=132,End=150,#Primer3|Sequence=GCGATCCTAGGGCGATCA,Start=1,End=18,	GGGGACCAGGTGCCGTAAGGTGAAGCTGACGCATAGATAGGAATTCTACATCAGCTTGTACAAAAATGACTTTCAATATCCTTCAACCGTTCCTGACTCTTTCCTGCTGACCCGTTTTTCCCTCTTGGACCCGCGATCCTAGGGCGATCA
225	225	2.9432	SetName|SetName=duplicate barcodes hubs#Context|Name=context_term_null_YDR286C#Barcode|Sequence=ATGTTGGTGAC,Start=19,End=29,#Primer5|Sequence=GGGGACCAGGTGCCGTAAG,Start=132,End=150,#Primer3|Sequence=GCGATCCTAGGGCGATCA,Start=1,End=18,	GGGGACCAGGTGCCGTAAGCCTCTTTTGTTTTTACTAGAGTTACAACACTGTAAATATTTATAAGCTATGAATAAGCCTCCTATATCTACGCTAATTTTACTATGCATACTTCTTACGCAGATGTTGGTGACGCGATCCTAGGGCGATCA
226	226	0.5081	SetName|SetName=duplicate barcodes hubs#Context|Name=context_term_null_YJL095W#Barcode|Sequence=AGTCAGTGTTT,Start=19,End=29,#Primer5|Sequence=GGGGACCAGGTGCCGTAAG,Start=132,End=150,#Primer3|Sequence=GCGATCCTAGGGCGATCA,Start=1,End=18,	GGGGACCAGGTGCCGTAAGGCTATTAGGATCGATCTATACTTAAGATATTTATGCAATAATATAGAACCATAGATGACGGAATGACGGAATGACTGAAAATTAAGAACAAAGAAAATTAAAAGTCAGTGTTTGCGATCCTAGGGCGATCA
227	227	2.515	SetName|SetName=duplicate barcodes hubs#Context|Name=context_term_null_YLR044C#Barcode|Sequence=CAAGTTCTCAG,Start=19,End=29,#Primer5|Sequence=GGGGACCAGGTGCCGTAAG,Start=132,End=150,#Primer3|Sequence=GCGATCCTAGGGCGATCA,Start=1,End=18,	GGGGACCAGGTGCCGTAAGGCGATTTAATCTCTAATTATTAGTTAAAGTTTTATAAGCATTTTACGAAATTGGTTCATATTATTACTGCACTGTCACTTACCATGGAAAGACCAGACAAGACAAGTTCTCAGGCGATCCTAGGGCGATCA
228	228	0.3631	SetName|SetName=duplicate barcodes hubs#Context|Name=context_term_null_YGR062C#Barcode|Sequence=CTCTTGCGACA,Start=19,End=29,#Primer5|Sequence=GGGGACCAGGTGCCGTAAG,Start=132,End=150,#Primer3|Sequence=GCGATCCTAGGGCGATCA,Start=1,End=18,	GGGGACCAGGTGCCGTAAGGTGAAGCTGACGCATAGATAGGAATTCTACATCAGCTTGTACAAAAATGACTTTCAATATCCTTCAACCGTTCCTGACTCTTTCCTGCTGACCCGTTTTTCCCTCTTGCGACAGCGATCCTAGGGCGATCA
229	229	2.7124	SetName|SetName=duplicate barcodes hubs#Context|Name=context_term_null_YDR286C#Barcode|Sequence=ATAGCGAGATC,Start=19,End=29,#Primer5|Sequence=GGGGACCAGGTGCCGTAAG,Start=132,End=150,#Primer3|Sequence=GCGATCCTAGGGCGATCA,Start=1,End=18,	GGGGACCAGGTGCCGTAAGCCTCTTTTGTTTTTACTAGAGTTACAACACTGTAAATATTTATAAGCTATGAATAAGCCTCCTATATCTACGCTAATTTTACTATGCATACTTCTTACGCAGATAGCGAGATCGCGATCCTAGGGCGATCA
230	230	0.8818	SetName|SetName=duplicate barcodes hubs#Context|Name=context_term_null_YJL095W#Barcode|Sequence=CCTCGGGAGAG,Start=19,End=29,#Primer5|Sequence=GGGGACCAGGTGCCGTAAG,Start=132,End=150,#Primer3|Sequence=GCGATCCTAGGGCGATCA,Start=1,End=18,	GGGGACCAGGTGCCGTAAGGCTATTAGGATCGATCTATACTTAAGATATTTATGCAATAATATAGAACCATAGATGACGGAATGACGGAATGACTGAAAATTAAGAACAAAGAAAATTAAACCTCGGGAGAGGCGATCCTAGGGCGATCA
231	231	3.0891	SetName|SetName=duplicate barcodes hubs#Context|Name=context_term_null_YLR044C#Barcode|Sequence=CCTTTCTTGGA,Start=19,End=29,#Primer5|Sequence=GGGGACCAGGTGCCGTAAG,Start=132,End=150,#Primer3|Sequence=GCGATCCTAGGGCGATCA,Start=1,End=18,	GGGGACCAGGTGCCGTAAGGCGATTTAATCTCTAATTATTAGTTAAAGTTTTATAAGCATTTTACGAAATTGGTTCATATTATTACTGCACTGTCACTTACCATGGAAAGACCAGACAAGACCTTTCTTGGAGCGATCCTAGGGCGATCA
232	232	0.3451	SetName|SetName=duplicate barcodes hubs#Context|Name=context_term_null_YGR062C#Barcode|Sequence=TATGCGCTCAG,Start=19,End=29,#Primer5|Sequence=GGGGACCAGGTGCCGTAAG,Start=132,End=150,#Primer3|Sequence=GCGATCCTAGGGCGATCA,Start=1,End=18,	GGGGACCAGGTGCCGTAAGGTGAAGCTGACGCATAGATAGGAATTCTACATCAGCTTGTACAAAAATGACTTTCAATATCCTTCAACCGTTCCTGACTCTTTCCTGCTGACCCGTTTTTCCTATGCGCTCAGGCGATCCTAGGGCGATCA
233	233	3.387	SetName|SetName=duplicate barcodes hubs#Context|Name=context_term_null_YDR286C#Barcode|Sequence=TATTGCCCGGG,Start=19,End=29,#Primer5|Sequence=GGGGACCAGGTGCCGTAAG,Start=132,End=150,#Primer3|Sequence=GCGATCCTAGGGCGATCA,Start=1,End=18,	GGGGACCAGGTGCCGTAAGCCTCTTTTGTTTTTACTAGAGTTACAACACTGTAAATATTTATAAGCTATGAATAAGCCTCCTATATCTACGCTAATTTTACTATGCATACTTCTTACGCAGTATTGCCCGGGGCGATCCTAGGGCGATCA
234	234	1.2166	SetName|SetName=duplicate barcodes hubs#Context|Name=context_term_null_YJL095W#Barcode|Sequence=AGGTCTTAGGC,Start=19,End=29,#Primer5|Sequence=GGGGACCAGGTGCCGTAAG,Start=132,End=150,#Primer3|Sequence=GCGATCCTAGGGCGATCA,Start=1,End=18,	GGGGACCAGGTGCCGTAAGGCTATTAGGATCGATCTATACTTAAGATATTTATGCAATAATATAGAACCATAGATGACGGAATGACGGAATGACTGAAAATTAAGAACAAAGAAAATTAAAAGGTCTTAGGCGCGATCCTAGGGCGATCA
235	235	2.4079	SetName|SetName=duplicate barcodes hubs#Context|Name=context_term_null_YLR044C#Barcode|Sequence=CACTGCGAAGT,Start=19,End=29,#Primer5|Sequence=GGGGACCAGGTGCCGTAAG,Start=132,End=150,#Primer3|Sequence=GCGATCCTAGGGCGATCA,Start=1,End=18,	GGGGACCAGGTGCCGTAAGGCGATTTAATCTCTAATTATTAGTTAAAGTTTTATAAGCATTTTACGAAATTGGTTCATATTATTACTGCACTGTCACTTACCATGGAAAGACCAGACAAGACACTGCGAAGTGCGATCCTAGGGCGATCA
236	236	0.31	SetName|SetName=duplicate barcodes hubs#Context|Name=context_term_null_YGR062C#Barcode|Sequence=AGTGTGAAAGG,Start=19,End=29,#Primer5|Sequence=GGGGACCAGGTGCCGTAAG,Start=132,End=150,#Primer3|Sequence=GCGATCCTAGGGCGATCA,Start=1,End=18,	GGGGACCAGGTGCCGTAAGGTGAAGCTGACGCATAGATAGGAATTCTACATCAGCTTGTACAAAAATGACTTTCAATATCCTTCAACCGTTCCTGACTCTTTCCTGCTGACCCGTTTTTCCAGTGTGAAAGGGCGATCCTAGGGCGATCA
237	237	2.9247	SetName|SetName=duplicate barcodes hubs#Context|Name=context_term_null_YDR286C#Barcode|Sequence=AGTGTATTTAC,Start=19,End=29,#Primer5|Sequence=GGGGACCAGGTGCCGTAAG,Start=132,End=150,#Primer3|Sequence=GCGATCCTAGGGCGATCA,Start=1,End=18,	GGGGACCAGGTGCCGTAAGCCTCTTTTGTTTTTACTAGAGTTACAACACTGTAAATATTTATAAGCTATGAATAAGCCTCCTATATCTACGCTAATTTTACTATGCATACTTCTTACGCAGAGTGTATTTACGCGATCCTAGGGCGATCA
238	238	0.7917	SetName|SetName=duplicate barcodes hubs#Context|Name=context_term_null_YJL095W#Barcode|Sequence=AATTTAGAAGC,Start=19,End=29,#Primer5|Sequence=GGGGACCAGGTGCCGTAAG,Start=132,End=150,#Primer3|Sequence=GCGATCCTAGGGCGATCA,Start=1,End=18,	GGGGACCAGGTGCCGTAAGGCTATTAGGATCGATCTATACTTAAGATATTTATGCAATAATATAGAACCATAGATGACGGAATGACGGAATGACTGAAAATTAAGAACAAAGAAAATTAAAAATTTAGAAGCGCGATCCTAGGGCGATCA
239	239	2.2361	SetName|SetName=duplicate barcodes hubs#Context|Name=context_term_null_YLR044C#Barcode|Sequence=GAATAGCATTC,Start=19,End=29,#Primer5|Sequence=GGGGACCAGGTGCCGTAAG,Start=132,End=150,#Primer3|Sequence=GCGATCCTAGGGCGATCA,Start=1,End=18,	GGGGACCAGGTGCCGTAAGGCGATTTAATCTCTAATTATTAGTTAAAGTTTTATAAGCATTTTACGAAATTGGTTCATATTATTACTGCACTGTCACTTACCATGGAAAGACCAGACAAGAGAATAGCATTCGCGATCCTAGGGCGATCA
240	240	3.9012	SetName|SetName=duplicate barcodes hubs#Context|Name=context_CYC1_synth_t#Element|Name=Cleave_opt,Type=termination,SubType=Cleave_opt,Strength=Strong,Orientation=plus,Sequence=TTTCAAA,Start=50#Element|Name=PE_opt,Type=termination,SubType=PE_opt,Strength=Strong,Orientation=plus,Sequence=AATAAA,Start=67#Element|Name=EE_opt,Type=termination,SubType=EE_opt,Strength=Strong,Orientation=plus,Sequence=TA…	GGGGACCAGGTGCCGTAAGTAACCGAAAAGGAAGGAGTTAGACAACCTGAAGTCTAGGTCCCTATATAACTGTCTAGAAATAAAGAGTATCATCTTTCAAATTTTTCTTTTTTTTCTGTACATAGGGATCGTGCGATCCTAGGGCGATCA
241	241	2.8619	SetName|SetName=duplicate barcodes hubs#Context|Name=context_CYC1_synth_t#Element|Name=Cleave_opt,Type=termination,SubType=Cleave_opt,Strength=Strong,Orientation=plus,Sequence=TTTCAAA,Start=50#Element|Name=PE_opt,Type=termination,SubType=PE_opt,Strength=Strong,Orientation=plus,Sequence=AATAAA,Start=67#Element|Name=EE_opt,Type=termination,SubType=EE_opt,Strength=Strong,Orientation=plus,Sequence=TA…	GGGGACCAGGTGCCGTAAGTAACCGAAAAGGAAGGAGTTAGACAACCTGAAGTCTAGGTCCCTATATAACTGTCTAGAAATAAAGAGTATCATCTTTCAAATTTTTCTTTTTTTTCTGTACAACTCACCGATGCGATCCTAGGGCGATCA
242	242		SetName|SetName=duplicate barcodes hubs#Context|Name=context_CYC1_synth_t#Element|Name=Cleave_opt,Type=termination,SubType=Cleave_opt,Strength=Strong,Orientation=plus,Sequence=TTTCAAA,Start=50#Element|Name=PE_opt,Type=termination,SubType=PE_opt,Strength=Strong,Orientation=plus,Sequence=AATAAA,Start=67#Element|Name=EE_opt,Type=termination,SubType=EE_opt,Strength=Strong,Orientation=plus,Sequence=TA…	GGGGACCAGGTGCCGTAAGTAACCGAAAAGGAAGGAGTTAGACAACCTGAAGTCTAGGTCCCTATATAACTGTCTAGAAATAAAGAGTATCATCTTTCAAATTTTTCTTTTTTTTCTGTACCTTGTACGTTAGCGATCCTAGGGCGATCA
243	243	2.3755	SetName|SetName=duplicate barcodes hubs#Context|Name=context_CYC1_synth_t#Element|Name=Cleave_opt,Type=termination,SubType=Cleave_opt,Strength=Strong,Orientation=plus,Sequence=TTTCAAA,Start=50#Element|Name=PE_opt,Type=termination,SubType=PE_opt,Strength=Strong,Orientation=plus,Sequence=AATAAA,Start=67#Element|Name=EE_opt,Type=termination,SubType=EE_opt,Strength=Strong,Orientation=plus,Sequence=TA…	GGGGACCAGGTGCCGTAAGTAACCGAAAAGGAAGGAGTTAGACAACCTGAAGTCTAGGTCCCTATATAACTGTCTAGAAATAAAGAGTATCATCTTTCAAATTTTTCTTTTTTTTCTGTACATGTGTTACATGCGATCCTAGGGCGATCA
244	244		SetName|SetName=duplicate barcodes hubs#Context|Name=context_CYC1_synth_t#Element|Name=Cleave_opt,Type=termination,SubType=Cleave_opt,Strength=Strong,Orientation=plus,Sequence=TTTCAAA,Start=50#Element|Name=PE_opt,Type=termination,SubType=PE_opt,Strength=Strong,Orientation=plus,Sequence=AATAAA,Start=67#Element|Name=EE_opt,Type=termination,SubType=EE_opt,Strength=Strong,Orientation=plus,Sequence=TA…	GGGGACCAGGTGCCGTAAGTAACCGAAAAGGAAGGAGTTAGACAACCTGAAGTCTAGGTCCCTATATAACTGTCTAGAAATAAAGAGTATCATCTTTCAAATTTTTCTTTTTTTTCTGTACATGCTAGTGATGCGATCCTAGGGCGATCA
245	245	3.4647	SetName|SetName=duplicate barcodes hubs#Context|Name=context_CYC1_synth_t#Element|Name=Cleave_opt,Type=termination,SubType=Cleave_opt,Strength=Strong,Orientation=plus,Sequence=TTTCAAA,Start=50#Element|Name=PE_opt,Type=termination,SubType=PE_opt,Strength=Strong,Orientation=plus,Sequence=AATAAA,Start=67#Element|Name=EE_opt,Type=termination,SubType=EE_opt,Strength=Strong,Orientation=plus,Sequence=TA…	GGGGACCAGGTGCCGTAAGTAACCGAAAAGGAAGGAGTTAGACAACCTGAAGTCTAGGTCCCTATATAACTGTCTAGAAATAAAGAGTATCATCTTTCAAATTTTTCTTTTTTTTCTGTACTTACACAGCTGGCGATCCTAGGGCGATCA
246	246	3.1045	SetName|SetName=duplicate barcodes hubs#Context|Name=context_CYC1_synth_t#Element|Name=Cleave_opt,Type=termination,SubType=Cleave_opt,Strength=Strong,Orientation=plus,Sequence=TTTCAAA,Start=50#Element|Name=PE_opt,Type=termination,SubType=PE_opt,Strength=Strong,Orientation=plus,Sequence=AATAAA,Start=67#Element|Name=EE_opt,Type=termination,SubType=EE_opt,Strength=Strong,Orientation=plus,Sequence=TA…	GGGGACCAGGTGCCGTAAGTAACCGAAAAGGAAGGAGTTAGACAACCTGAAGTCTAGGTCCCTATATAACTGTCTAGAAATAAAGAGTATCATCTTTCAAATTTTTCTTTTTTTTCTGTACGAGCGTTACAGGCGATCCTAGGGCGATCA
247	247	3.5178	SetName|SetName=duplicate barcodes hubs#Context|Name=context_CYC1_synth_t#Element|Name=Cleave_opt,Type=termination,SubType=Cleave_opt,Strength=Strong,Orientation=plus,Sequence=TTTCAAA,Start=50#Element|Name=PE_opt,Type=termination,SubType=PE_opt,Strength=Strong,Orientation=plus,Sequence=AATAAA,Start=67#Element|Name=EE_opt,Type=termination,SubType=EE_opt,Strength=Strong,Orientation=plus,Sequence=TA…	GGGGACCAGGTGCCGTAAGTAACCGAAAAGGAAGGAGTTAGACAACCTGAAGTCTAGGTCCCTATATAACTGTCTAGAAATAAAGAGTATCATCTTTCAAATTTTTCTTTTTTTTCTGTACTCAACGTATTCGCGATCCTAGGGCGATCA
248	248	3.9258	SetName|SetName=duplicate barcodes hubs#Context|Name=context_CYC1_synth_t#Element|Name=Cleave_opt,Type=termination,SubType=Cleave_opt,Strength=Strong,Orientation=plus,Sequence=TTTCAAA,Start=50#Element|Name=PE_opt,Type=termination,SubType=PE_opt,Strength=Strong,Orientation=plus,Sequence=AATAAA,Start=67#Element|Name=EE_opt,Type=termination,SubType=EE_opt,Strength=Strong,Orientation=plus,Sequence=TA…	GGGGACCAGGTGCCGTAAGTAACCGAAAAGGAAGGAGTTAGACAACCTGAAGTCTAGGTCCCTATATAACTGTCTAGAAATAAAGAGTATCATCTTTCAAATTTTTCTTTTTTTTCTGTACGTCCTGCAGAAGCGATCCTAGGGCGATCA
249	249	2.9383	SetName|SetName=duplicate barcodes hubs#Context|Name=context_CYC1_synth_t#Element|Name=Cleave_opt,Type=termination,SubType=Cleave_opt,Strength=Strong,Orientation=plus,Sequence=TTTCAAA,Start=50#Element|Name=PE_opt,Type=termination,SubType=PE_opt,Strength=Strong,Orientation=plus,Sequence=AATAAA,Start=67#Element|Name=EE_opt,Type=termination,SubType=EE_opt,Strength=Strong,Orientation=plus,Sequence=TA…	GGGGACCAGGTGCCGTAAGTAACCGAAAAGGAAGGAGTTAGACAACCTGAAGTCTAGGTCCCTATATAACTGTCTAGAAATAAAGAGTATCATCTTTCAAATTTTTCTTTTTTTTCTGTACTATGACTTCAGGCGATCCTAGGGCGATCA
250	250	2.376	SetName|SetName=duplicate barcodes hubs#Context|Name=context_CYC1_synth_t#Element|Name=Cleave_opt,Type=termination,SubType=Cleave_opt,Strength=Strong,Orientation=plus,Sequence=TTTCAAA,Start=50#Element|Name=PE_opt,Type=termination,SubType=PE_opt,Strength=Strong,Orientation=plus,Sequence=AATAAA,Start=67#Element|Name=EE_opt,Type=termination,SubType=EE_opt,Strength=Strong,Orientation=plus,Sequence=TA…	GGGGACCAGGTGCCGTAAGTAACCGAAAAGGAAGGAGTTAGACAACCTGAAGTCTAGGTCCCTATATAACTGTCTAGAAATAAAGAGTATCATCTTTCAAATTTTTCTTTTTTTTCTGTACCACTGGGTGATGCGATCCTAGGGCGATCA
251	251	3.5464	SetName|SetName=duplicate barcodes hubs#Context|Name=context_CYC1_synth_t#Element|Name=Cleave_opt,Type=termination,SubType=Cleave_opt,Strength=Strong,Orientation=plus,Sequence=TTTCAAA,Start=50#Element|Name=PE_opt,Type=termination,SubType=PE_opt,Strength=Strong,Orientation=plus,Sequence=AATAAA,Start=67#Element|Name=EE_opt,Type=termination,SubType=EE_opt,Strength=Strong,Orientation=plus,Sequence=TA…	GGGGACCAGGTGCCGTAAGTAACCGAAAAGGAAGGAGTTAGACAACCTGAAGTCTAGGTCCCTATATAACTGTCTAGAAATAAAGAGTATCATCTTTCAAATTTTTCTTTTTTTTCTGTACGTGGTCAAGGTGCGATCCTAGGGCGATCA
252	252	2.9596	SetName|SetName=duplicate barcodes hubs#Context|Name=context_CYC1_synth_t#Element|Name=Cleave_opt,Type=termination,SubType=Cleave_opt,Strength=Strong,Orientation=plus,Sequence=TTTCAAA,Start=50#Element|Name=PE_opt,Type=termination,SubType=PE_opt,Strength=Strong,Orientation=plus,Sequence=AATAAA,Start=67#Element|Name=EE_opt,Type=termination,SubType=EE_opt,Strength=Strong,Orientation=plus,Sequence=TA…	GGGGACCAGGTGCCGTAAGTAACCGAAAAGGAAGGAGTTAGACAACCTGAAGTCTAGGTCCCTATATAACTGTCTAGAAATAAAGAGTATCATCTTTCAAATTTTTCTTTTTTTTCTGTACATGTCGGGCACGCGATCCTAGGGCGATCA
253	253	3.4221	SetName|SetName=duplicate barcodes hubs#Context|Name=context_CYC1_synth_t#Element|Name=Cleave_opt,Type=termination,SubType=Cleave_opt,Strength=Strong,Orientation=plus,Sequence=TTTCAAA,Start=50#Element|Name=PE_opt,Type=termination,SubType=PE_opt,Strength=Strong,Orientation=plus,Sequence=AATAAA,Start=67#Element|Name=EE_opt,Type=termination,SubType=EE_opt,Strength=Strong,Orientation=plus,Sequence=TA…	GGGGACCAGGTGCCGTAAGTAACCGAAAAGGAAGGAGTTAGACAACCTGAAGTCTAGGTCCCTATATAACTGTCTAGAAATAAAGAGTATCATCTTTCAAATTTTTCTTTTTTTTCTGTACTAAGCTGCAGCGCGATCCTAGGGCGATCA
254	254	4.2824	SetName|SetName=duplicate barcodes hubs#Context|Name=context_CYC1_synth_t#Element|Name=Cleave_opt,Type=termination,SubType=Cleave_opt,Strength=Strong,Orientation=plus,Sequence=TTTCAAA,Start=50#Element|Name=PE_opt,Type=termination,SubType=PE_opt,Strength=Strong,Orientation=plus,Sequence=AATAAA,Start=67#Element|Name=EE_opt,Type=termination,SubType=EE_opt,Strength=Strong,Orientation=plus,Sequence=TA…	GGGGACCAGGTGCCGTAAGTAACCGAAAAGGAAGGAGTTAGACAACCTGAAGTCTAGGTCCCTATATAACTGTCTAGAAATAAAGAGTATCATCTTTCAAATTTTTCTTTTTTTTCTGTACTTGCACAAATAGCGATCCTAGGGCGATCA
255	255	2.9918	SetName|SetName=duplicate barcodes hubs#Context|Name=context_CYC1_synth_t#Element|Name=Cleave_opt,Type=termination,SubType=Cleave_opt,Strength=Strong,Orientation=plus,Sequence=TTTCAAA,Start=50#Element|Name=PE_opt,Type=termination,SubType=PE_opt,Strength=Strong,Orientation=plus,Sequence=AATAAA,Start=67#Element|Name=EE_opt,Type=termination,SubType=EE_opt,Strength=Strong,Orientation=plus,Sequence=TA…	GGGGACCAGGTGCCGTAAGTAACCGAAAAGGAAGGAGTTAGACAACCTGAAGTCTAGGTCCCTATATAACTGTCTAGAAATAAAGAGTATCATCTTTCAAATTTTTCTTTTTTTTCTGTACCCTCCCGAAGAGCGATCCTAGGGCGATCA
256	256	3.6466	SetName|SetName=duplicate barcodes hubs#Context|Name=context_CYC1_synth_t#Element|Name=Cleave_opt,Type=termination,SubType=Cleave_opt,Strength=Strong,Orientation=plus,Sequence=TTTCAAA,Start=50#Element|Name=PE_opt,Type=termination,SubType=PE_opt,Strength=Strong,Orientation=plus,Sequence=AATAAA,Start=67#Element|Name=EE_opt,Type=termination,SubType=EE_opt,Strength=Strong,Orientation=plus,Sequence=TA…	GGGGACCAGGTGCCGTAAGTAACCGAAAAGGAAGGAGTTAGACAACCTGAAGTCTAGGTCCCTATATAACTGTCTAGAAATAAAGAGTATCATCTTTCAAATTTTTCTTTTTTTTCTGTACTCAACGATTTAGCGATCCTAGGGCGATCA
257	257	2.1222	SetName|SetName=duplicate barcodes hubs#Context|Name=context_CYC1_synth_t#Element|Name=Cleave_opt,Type=termination,SubType=Cleave_opt,Strength=Strong,Orientation=plus,Sequence=TTTCAAA,Start=50#Element|Name=PE_opt,Type=termination,SubType=PE_opt,Strength=Strong,Orientation=plus,Sequence=AATAAA,Start=67#Element|Name=EE_opt,Type=termination,SubType=EE_opt,Strength=Strong,Orientation=plus,Sequence=TA…	GGGGACCAGGTGCCGTAAGTAACCGAAAAGGAAGGAGTTAGACAACCTGAAGTCTAGGTCCCTATATAACTGTCTAGAAATAAAGAGTATCATCTTTCAAATTTTTCTTTTTTTTCTGTACAGAGATTCGGCGCGATCCTAGGGCGATCA
258	258	3.6354	SetName|SetName=duplicate barcodes hubs#Context|Name=context_CYC1_synth_t#Element|Name=Cleave_opt,Type=termination,SubType=Cleave_opt,Strength=Strong,Orientation=plus,Sequence=TTTCAAA,Start=50#Element|Name=PE_opt,Type=termination,SubType=PE_opt,Strength=Strong,Orientation=plus,Sequence=AATAAA,Start=67#Element|Name=EE_opt,Type=termination,SubType=EE_opt,Strength=Strong,Orientation=plus,Sequence=TA…	GGGGACCAGGTGCCGTAAGTAACCGAAAAGGAAGGAGTTAGACAACCTGAAGTCTAGGTCCCTATATAACTGTCTAGAAATAAAGAGTATCATCTTTCAAATTTTTCTTTTTTTTCTGTACCTCAAGTAATGGCGATCCTAGGGCGATCA
259	259	3.0612	SetName|SetName=duplicate barcodes hubs#Context|Name=context_CYC1_synth_t#Element|Name=Cleave_opt,Type=termination,SubType=Cleave_opt,Strength=Strong,Orientation=plus,Sequence=TTTCAAA,Start=50#Element|Name=PE_opt,Type=termination,SubType=PE_opt,Strength=Strong,Orientation=plus,Sequence=AATAAA,Start=67#Element|Name=EE_opt,Type=termination,SubType=EE_opt,Strength=Strong,Orientation=plus,Sequence=TA…	GGGGACCAGGTGCCGTAAGTAACCGAAAAGGAAGGAGTTAGACAACCTGAAGTCTAGGTCCCTATATAACTGTCTAGAAATAAAGAGTATCATCTTTCAAATTTTTCTTTTTTTTCTGTACGAGCTCGTGTCGCGATCCTAGGGCGATCA
260	260	2.4193	SetName|SetName=duplicate barcodes hubs#Context|Name=context_term_ins_YGR062C#Element|Name=PE_YGR062C,Type=termination,SubType=PE_YGR062C,Strength=Strong,Orientation=plus,Sequence=AATAAA,Start=79#Element|Name=EE_YGR062C,Type=termination,SubType=EE_YGR062C,Strength=Strong,Orientation=plus,Sequence=TATGTA,Start=103#Barcode|Sequence=AGACCCATTTA,Start=19,End=29,#Primer5|Sequence=GGGGACCAGGTGCCGTAAG,S…	GGGGACCAGGTGCCGTAAGGTGAAGCTGACGCATAGATAGGATATGTAATTCTACATCAGCTTGTAAATAAACAAAAATGACTTTCAATATCCTTCAACCGTTCCTGACTCTTTCCTGCTGAGACCCATTTAGCGATCCTAGGGCGATCA
261	261	2.5919	SetName|SetName=duplicate barcodes hubs#Context|Name=context_term_ins_YGR062C#Element|Name=PE_YGR062C,Type=termination,SubType=PE_YGR062C,Strength=Strong,Orientation=plus,Sequence=AATAAA,Start=79#Element|Name=EE_YGR062C,Type=termination,SubType=EE_YGR062C,Strength=Strong,Orientation=plus,Sequence=TATGTA,Start=103#Barcode|Sequence=ATGTACACAGG,Start=19,End=29,#Primer5|Sequence=GGGGACCAGGTGCCGTAAG,S…	GGGGACCAGGTGCCGTAAGGTGAAGCTGACGCATAGATAGGATATGTAATTCTACATCAGCTTGTAAATAAACAAAAATGACTTTCAATATCCTTCAACCGTTCCTGACTCTTTCCTGCTGATGTACACAGGGCGATCCTAGGGCGATCA
262	262		SetName|SetName=duplicate barcodes hubs#Context|Name=context_term_ins_YGR062C#Element|Name=PE_YGR062C,Type=termination,SubType=PE_YGR062C,Strength=Strong,Orientation=plus,Sequence=AATAAA,Start=79#Element|Name=EE_YGR062C,Type=termination,SubType=EE_YGR062C,Strength=Strong,Orientation=plus,Sequence=TATGTA,Start=103#Barcode|Sequence=ATCTGAGCAGT,Start=19,End=29,#Primer5|Sequence=GGGGACCAGGTGCCGTAAG,S…	GGGGACCAGGTGCCGTAAGGTGAAGCTGACGCATAGATAGGATATGTAATTCTACATCAGCTTGTAAATAAACAAAAATGACTTTCAATATCCTTCAACCGTTCCTGACTCTTTCCTGCTGATCTGAGCAGTGCGATCCTAGGGCGATCA
263	263	2.5136	SetName|SetName=duplicate barcodes hubs#Context|Name=context_term_ins_YGR062C#Element|Name=PE_YGR062C,Type=termination,SubType=PE_YGR062C,Strength=Strong,Orientation=plus,Sequence=AATAAA,Start=79#Element|Name=EE_YGR062C,Type=termination,SubType=EE_YGR062C,Strength=Strong,Orientation=plus,Sequence=TATGTA,Start=103#Barcode|Sequence=CCATTAGCATA,Start=19,End=29,#Primer5|Sequence=GGGGACCAGGTGCCGTAAG,S…	GGGGACCAGGTGCCGTAAGGTGAAGCTGACGCATAGATAGGATATGTAATTCTACATCAGCTTGTAAATAAACAAAAATGACTTTCAATATCCTTCAACCGTTCCTGACTCTTTCCTGCTGCCATTAGCATAGCGATCCTAGGGCGATCA
264	264	2.1488	SetName|SetName=duplicate barcodes hubs#Context|Name=context_term_ins_YGR062C#Element|Name=PE_YGR062C,Type=termination,SubType=PE_YGR062C,Strength=Strong,Orientation=plus,Sequence=AATAAA,Start=79#Element|Name=EE_YGR062C,Type=termination,SubType=EE_YGR062C,Strength=Strong,Orientation=plus,Sequence=TATGTA,Start=103#Barcode|Sequence=AGGTCCTACCC,Start=19,End=29,#Primer5|Sequence=GGGGACCAGGTGCCGTAAG,S…	GGGGACCAGGTGCCGTAAGGTGAAGCTGACGCATAGATAGGATATGTAATTCTACATCAGCTTGTAAATAAACAAAAATGACTTTCAATATCCTTCAACCGTTCCTGACTCTTTCCTGCTGAGGTCCTACCCGCGATCCTAGGGCGATCA
265	265	2.4198	SetName|SetName=duplicate barcodes hubs#Context|Name=context_term_ins_YGR062C#Element|Name=PE_YGR062C,Type=termination,SubType=PE_YGR062C,Strength=Strong,Orientation=plus,Sequence=AATAAA,Start=79#Element|Name=EE_YGR062C,Type=termination,SubType=EE_YGR062C,Strength=Strong,Orientation=plus,Sequence=TATGTA,Start=103#Barcode|Sequence=AGTGCGCCCAT,Start=19,End=29,#Primer5|Sequence=GGGGACCAGGTGCCGTAAG,S…	GGGGACCAGGTGCCGTAAGGTGAAGCTGACGCATAGATAGGATATGTAATTCTACATCAGCTTGTAAATAAACAAAAATGACTTTCAATATCCTTCAACCGTTCCTGACTCTTTCCTGCTGAGTGCGCCCATGCGATCCTAGGGCGATCA
266	266	2.4902	SetName|SetName=duplicate barcodes hubs#Context|Name=context_term_ins_YGR062C#Element|Name=PE_YGR062C,Type=termination,SubType=PE_YGR062C,Strength=Strong,Orientation=plus,Sequence=AATAAA,Start=79#Element|Name=EE_YGR062C,Type=termination,SubType=EE_YGR062C,Strength=Strong,Orientation=plus,Sequence=TATGTA,Start=103#Barcode|Sequence=GAGGTCCGTAT,Start=19,End=29,#Primer5|Sequence=GGGGACCAGGTGCCGTAAG,S…	GGGGACCAGGTGCCGTAAGGTGAAGCTGACGCATAGATAGGATATGTAATTCTACATCAGCTTGTAAATAAACAAAAATGACTTTCAATATCCTTCAACCGTTCCTGACTCTTTCCTGCTGGAGGTCCGTATGCGATCCTAGGGCGATCA
267	267	2.7583	SetName|SetName=duplicate barcodes hubs#Context|Name=context_term_ins_YGR062C#Element|Name=PE_YGR062C,Type=termination,SubType=PE_YGR062C,Strength=Strong,Orientation=plus,Sequence=AATAAA,Start=79#Element|Name=EE_YGR062C,Type=termination,SubType=EE_YGR062C,Strength=Strong,Orientation=plus,Sequence=TATGTA,Start=103#Barcode|Sequence=TAGGCTGCGCC,Start=19,End=29,#Primer5|Sequence=GGGGACCAGGTGCCGTAAG,S…	GGGGACCAGGTGCCGTAAGGTGAAGCTGACGCATAGATAGGATATGTAATTCTACATCAGCTTGTAAATAAACAAAAATGACTTTCAATATCCTTCAACCGTTCCTGACTCTTTCCTGCTGTAGGCTGCGCCGCGATCCTAGGGCGATCA
268	268	3.0162	SetName|SetName=duplicate barcodes hubs#Context|Name=context_term_ins_YGR062C#Element|Name=PE_YGR062C,Type=termination,SubType=PE_YGR062C,Strength=Strong,Orientation=plus,Sequence=AATAAA,Start=79#Element|Name=EE_YGR062C,Type=termination,SubType=EE_YGR062C,Strength=Strong,Orientation=plus,Sequence=TATGTA,Start=103#Barcode|Sequence=TAGTCTGGGAG,Start=19,End=29,#Primer5|Sequence=GGGGACCAGGTGCCGTAAG,S…	GGGGACCAGGTGCCGTAAGGTGAAGCTGACGCATAGATAGGATATGTAATTCTACATCAGCTTGTAAATAAACAAAAATGACTTTCAATATCCTTCAACCGTTCCTGACTCTTTCCTGCTGTAGTCTGGGAGGCGATCCTAGGGCGATCA
269	269	2.6222	SetName|SetName=duplicate barcodes hubs#Context|Name=context_term_ins_YGR062C#Element|Name=PE_YGR062C,Type=termination,SubType=PE_YGR062C,Strength=Strong,Orientation=plus,Sequence=AATAAA,Start=79#Element|Name=EE_YGR062C,Type=termination,SubType=EE_YGR062C,Strength=Strong,Orientation=plus,Sequence=TATGTA,Start=103#Barcode|Sequence=GAAAACTGTCC,Start=19,End=29,#Primer5|Sequence=GGGGACCAGGTGCCGTAAG,S…	GGGGACCAGGTGCCGTAAGGTGAAGCTGACGCATAGATAGGATATGTAATTCTACATCAGCTTGTAAATAAACAAAAATGACTTTCAATATCCTTCAACCGTTCCTGACTCTTTCCTGCTGGAAAACTGTCCGCGATCCTAGGGCGATCA
270	270	2.3213	SetName|SetName=duplicate barcodes hubs#Context|Name=context_term_ins_YGR062C#Element|Name=PE_YGR062C,Type=termination,SubType=PE_YGR062C,Strength=Strong,Orientation=plus,Sequence=AATAAA,Start=79#Element|Name=EE_YGR062C,Type=termination,SubType=EE_YGR062C,Strength=Strong,Orientation=plus,Sequence=TATGTA,Start=103#Barcode|Sequence=CTGAAATATCG,Start=19,End=29,#Primer5|Sequence=GGGGACCAGGTGCCGTAAG,S…	GGGGACCAGGTGCCGTAAGGTGAAGCTGACGCATAGATAGGATATGTAATTCTACATCAGCTTGTAAATAAACAAAAATGACTTTCAATATCCTTCAACCGTTCCTGACTCTTTCCTGCTGCTGAAATATCGGCGATCCTAGGGCGATCA
271	271	2.5467	SetName|SetName=duplicate barcodes hubs#Context|Name=context_term_ins_YGR062C#Element|Name=PE_YGR062C,Type=termination,SubType=PE_YGR062C,Strength=Strong,Orientation=plus,Sequence=AATAAA,Start=79#Element|Name=EE_YGR062C,Type=termination,SubType=EE_YGR062C,Strength=Strong,Orientation=plus,Sequence=TATGTA,Start=103#Barcode|Sequence=GTAACGCACCT,Start=19,End=29,#Primer5|Sequence=GGGGACCAGGTGCCGTAAG,S…	GGGGACCAGGTGCCGTAAGGTGAAGCTGACGCATAGATAGGATATGTAATTCTACATCAGCTTGTAAATAAACAAAAATGACTTTCAATATCCTTCAACCGTTCCTGACTCTTTCCTGCTGGTAACGCACCTGCGATCCTAGGGCGATCA
272	272	2.6612	SetName|SetName=duplicate barcodes hubs#Context|Name=context_term_ins_YGR062C#Element|Name=PE_YGR062C,Type=termination,SubType=PE_YGR062C,Strength=Strong,Orientation=plus,Sequence=AATAAA,Start=79#Element|Name=EE_YGR062C,Type=termination,SubType=EE_YGR062C,Strength=Strong,Orientation=plus,Sequence=TATGTA,Start=103#Barcode|Sequence=TCTAGTCACGA,Start=19,End=29,#Primer5|Sequence=GGGGACCAGGTGCCGTAAG,S…	GGGGACCAGGTGCCGTAAGGTGAAGCTGACGCATAGATAGGATATGTAATTCTACATCAGCTTGTAAATAAACAAAAATGACTTTCAATATCCTTCAACCGTTCCTGACTCTTTCCTGCTGTCTAGTCACGAGCGATCCTAGGGCGATCA
273	273		SetName|SetName=duplicate barcodes hubs#Context|Name=context_term_ins_YGR062C#Element|Name=PE_YGR062C,Type=termination,SubType=PE_YGR062C,Strength=Strong,Orientation=plus,Sequence=AATAAA,Start=79#Element|Name=EE_YGR062C,Type=termination,SubType=EE_YGR062C,Strength=Strong,Orientation=plus,Sequence=TATGTA,Start=103#Barcode|Sequence=CTTCGCACTGG,Start=19,End=29,#Primer5|Sequence=GGGGACCAGGTGCCGTAAG,S…	GGGGACCAGGTGCCGTAAGGTGAAGCTGACGCATAGATAGGATATGTAATTCTACATCAGCTTGTAAATAAACAAAAATGACTTTCAATATCCTTCAACCGTTCCTGACTCTTTCCTGCTGCTTCGCACTGGGCGATCCTAGGGCGATCA
274	274		SetName|SetName=duplicate barcodes hubs#Context|Name=context_term_ins_YGR062C#Element|Name=PE_YGR062C,Type=termination,SubType=PE_YGR062C,Strength=Strong,Orientation=plus,Sequence=AATAAA,Start=79#Element|Name=EE_YGR062C,Type=termination,SubType=EE_YGR062C,Strength=Strong,Orientation=plus,Sequence=TATGTA,Start=103#Barcode|Sequence=CAGAATCCATA,Start=19,End=29,#Primer5|Sequence=GGGGACCAGGTGCCGTAAG,S…	GGGGACCAGGTGCCGTAAGGTGAAGCTGACGCATAGATAGGATATGTAATTCTACATCAGCTTGTAAATAAACAAAAATGACTTTCAATATCCTTCAACCGTTCCTGACTCTTTCCTGCTGCAGAATCCATAGCGATCCTAGGGCGATCA
275	275	2.481	SetName|SetName=duplicate barcodes hubs#Context|Name=context_term_ins_YGR062C#Element|Name=PE_YGR062C,Type=termination,SubType=PE_YGR062C,Strength=Strong,Orientation=plus,Sequence=AATAAA,Start=79#Element|Name=EE_YGR062C,Type=termination,SubType=EE_YGR062C,Strength=Strong,Orientation=plus,Sequence=TATGTA,Start=103#Barcode|Sequence=ATGCGTCCTTA,Start=19,End=29,#Primer5|Sequence=GGGGACCAGGTGCCGTAAG,S…	GGGGACCAGGTGCCGTAAGGTGAAGCTGACGCATAGATAGGATATGTAATTCTACATCAGCTTGTAAATAAACAAAAATGACTTTCAATATCCTTCAACCGTTCCTGACTCTTTCCTGCTGATGCGTCCTTAGCGATCCTAGGGCGATCA
276	276	2.4267	SetName|SetName=duplicate barcodes hubs#Context|Name=context_term_ins_YGR062C#Element|Name=PE_YGR062C,Type=termination,SubType=PE_YGR062C,Strength=Strong,Orientation=plus,Sequence=AATAAA,Start=79#Element|Name=EE_YGR062C,Type=termination,SubType=EE_YGR062C,Strength=Strong,Orientation=plus,Sequence=TATGTA,Start=103#Barcode|Sequence=CCACTCTGTTG,Start=19,End=29,#Primer5|Sequence=GGGGACCAGGTGCCGTAAG,S…	GGGGACCAGGTGCCGTAAGGTGAAGCTGACGCATAGATAGGATATGTAATTCTACATCAGCTTGTAAATAAACAAAAATGACTTTCAATATCCTTCAACCGTTCCTGACTCTTTCCTGCTGCCACTCTGTTGGCGATCCTAGGGCGATCA
277	277	2.7632	SetName|SetName=duplicate barcodes hubs#Context|Name=context_term_ins_YGR062C#Element|Name=PE_YGR062C,Type=termination,SubType=PE_YGR062C,Strength=Strong,Orientation=plus,Sequence=AATAAA,Start=79#Element|Name=EE_YGR062C,Type=termination,SubType=EE_YGR062C,Strength=Strong,Orientation=plus,Sequence=TATGTA,Start=103#Barcode|Sequence=GGCGGTAGTCC,Start=19,End=29,#Primer5|Sequence=GGGGACCAGGTGCCGTAAG,S…	GGGGACCAGGTGCCGTAAGGTGAAGCTGACGCATAGATAGGATATGTAATTCTACATCAGCTTGTAAATAAACAAAAATGACTTTCAATATCCTTCAACCGTTCCTGACTCTTTCCTGCTGGGCGGTAGTCCGCGATCCTAGGGCGATCA
278	278	2.3837	SetName|SetName=duplicate barcodes hubs#Context|Name=context_term_ins_YGR062C#Element|Name=PE_YGR062C,Type=termination,SubType=PE_YGR062C,Strength=Strong,Orientation=plus,Sequence=AATAAA,Start=79#Element|Name=EE_YGR062C,Type=termination,SubType=EE_YGR062C,Strength=Strong,Orientation=plus,Sequence=TATGTA,Start=103#Barcode|Sequence=CTTTCTGTCCA,Start=19,End=29,#Primer5|Sequence=GGGGACCAGGTGCCGTAAG,S…	GGGGACCAGGTGCCGTAAGGTGAAGCTGACGCATAGATAGGATATGTAATTCTACATCAGCTTGTAAATAAACAAAAATGACTTTCAATATCCTTCAACCGTTCCTGACTCTTTCCTGCTGCTTTCTGTCCAGCGATCCTAGGGCGATCA
279	279	2.5563	SetName|SetName=duplicate barcodes hubs#Context|Name=context_term_ins_YGR062C#Element|Name=PE_YGR062C,Type=termination,SubType=PE_YGR062C,Strength=Strong,Orientation=plus,Sequence=AATAAA,Start=79#Element|Name=EE_YGR062C,Type=termination,SubType=EE_YGR062C,Strength=Strong,Orientation=plus,Sequence=TATGTA,Start=103#Barcode|Sequence=TTGAGAGCGTT,Start=19,End=29,#Primer5|Sequence=GGGGACCAGGTGCCGTAAG,S…	GGGGACCAGGTGCCGTAAGGTGAAGCTGACGCATAGATAGGATATGTAATTCTACATCAGCTTGTAAATAAACAAAAATGACTTTCAATATCCTTCAACCGTTCCTGACTCTTTCCTGCTGTTGAGAGCGTTGCGATCCTAGGGCGATCA
280	280	4.5476	SetName|SetName=duplicate barcodes hubs#Context|Name=context_term_ins_YDR286C#Element|Name=PE_YDR286C,Type=termination,SubType=PE_YDR286C,Strength=Strong,Orientation=plus,Sequence=AAAAAA,Start=59#Element|Name=EE_YDR286C,Type=termination,SubType=EE_YDR286C,Strength=Strong,Orientation=plus,Sequence=TATATA,Start=69#Barcode|Sequence=TAACTAGATAG,Start=19,End=29,#Primer5|Sequence=GGGGACCAGGTGCCGTAAG,St…	GGGGACCAGGTGCCGTAAGCCTCTTTTGTTTTTACTAGAGTTACAACACTGTAAATATTTATAAGCTATGAATAAGTATATACCTCAAAAAACTATATCTACGCTAATTTTACTATGCATATAACTAGATAGGCGATCCTAGGGCGATCA
281	281	3.7562	SetName|SetName=duplicate barcodes hubs#Context|Name=context_term_ins_YDR286C#Element|Name=PE_YDR286C,Type=termination,SubType=PE_YDR286C,Strength=Strong,Orientation=plus,Sequence=AAAAAA,Start=59#Element|Name=EE_YDR286C,Type=termination,SubType=EE_YDR286C,Strength=Strong,Orientation=plus,Sequence=TATATA,Start=69#Barcode|Sequence=ACCAACAGGGC,Start=19,End=29,#Primer5|Sequence=GGGGACCAGGTGCCGTAAG,St…	GGGGACCAGGTGCCGTAAGCCTCTTTTGTTTTTACTAGAGTTACAACACTGTAAATATTTATAAGCTATGAATAAGTATATACCTCAAAAAACTATATCTACGCTAATTTTACTATGCATAACCAACAGGGCGCGATCCTAGGGCGATCA
282	282	4.63	SetName|SetName=duplicate barcodes hubs#Context|Name=context_term_ins_YDR286C#Element|Name=PE_YDR286C,Type=termination,SubType=PE_YDR286C,Strength=Strong,Orientation=plus,Sequence=AAAAAA,Start=59#Element|Name=EE_YDR286C,Type=termination,SubType=EE_YDR286C,Strength=Strong,Orientation=plus,Sequence=TATATA,Start=69#Barcode|Sequence=ACAGTGTAGTG,Start=19,End=29,#Primer5|Sequence=GGGGACCAGGTGCCGTAAG,St…	GGGGACCAGGTGCCGTAAGCCTCTTTTGTTTTTACTAGAGTTACAACACTGTAAATATTTATAAGCTATGAATAAGTATATACCTCAAAAAACTATATCTACGCTAATTTTACTATGCATAACAGTGTAGTGGCGATCCTAGGGCGATCA
283	283	5.5275	SetName|SetName=duplicate barcodes hubs#Context|Name=context_term_ins_YDR286C#Element|Name=PE_YDR286C,Type=termination,SubType=PE_YDR286C,Strength=Strong,Orientation=plus,Sequence=AAAAAA,Start=59#Element|Name=EE_YDR286C,Type=termination,SubType=EE_YDR286C,Strength=Strong,Orientation=plus,Sequence=TATATA,Start=69#Barcode|Sequence=GAGCGCTAGAT,Start=19,End=29,#Primer5|Sequence=GGGGACCAGGTGCCGTAAG,St…	GGGGACCAGGTGCCGTAAGCCTCTTTTGTTTTTACTAGAGTTACAACACTGTAAATATTTATAAGCTATGAATAAGTATATACCTCAAAAAACTATATCTACGCTAATTTTACTATGCATAGAGCGCTAGATGCGATCCTAGGGCGATCA
284	284	4.2988	SetName|SetName=duplicate barcodes hubs#Context|Name=context_term_ins_YDR286C#Element|Name=PE_YDR286C,Type=termination,SubType=PE_YDR286C,Strength=Strong,Orientation=plus,Sequence=AAAAAA,Start=59#Element|Name=EE_YDR286C,Type=termination,SubType=EE_YDR286C,Strength=Strong,Orientation=plus,Sequence=TATATA,Start=69#Barcode|Sequence=CGACGAGGTCT,Start=19,End=29,#Primer5|Sequence=GGGGACCAGGTGCCGTAAG,St…	GGGGACCAGGTGCCGTAAGCCTCTTTTGTTTTTACTAGAGTTACAACACTGTAAATATTTATAAGCTATGAATAAGTATATACCTCAAAAAACTATATCTACGCTAATTTTACTATGCATACGACGAGGTCTGCGATCCTAGGGCGATCA
285	285	4.1453	SetName|SetName=duplicate barcodes hubs#Context|Name=context_term_ins_YDR286C#Element|Name=PE_YDR286C,Type=termination,SubType=PE_YDR286C,Strength=Strong,Orientation=plus,Sequence=AAAAAA,Start=59#Element|Name=EE_YDR286C,Type=termination,SubType=EE_YDR286C,Strength=Strong,Orientation=plus,Sequence=TATATA,Start=69#Barcode|Sequence=TGGTCGTCACC,Start=19,End=29,#Primer5|Sequence=GGGGACCAGGTGCCGTAAG,St…	GGGGACCAGGTGCCGTAAGCCTCTTTTGTTTTTACTAGAGTTACAACACTGTAAATATTTATAAGCTATGAATAAGTATATACCTCAAAAAACTATATCTACGCTAATTTTACTATGCATATGGTCGTCACCGCGATCCTAGGGCGATCA
286	286	4.1364	SetName|SetName=duplicate barcodes hubs#Context|Name=context_term_ins_YDR286C#Element|Name=PE_YDR286C,Type=termination,SubType=PE_YDR286C,Strength=Strong,Orientation=plus,Sequence=AAAAAA,Start=59#Element|Name=EE_YDR286C,Type=termination,SubType=EE_YDR286C,Strength=Strong,Orientation=plus,Sequence=TATATA,Start=69#Barcode|Sequence=CACGATCTTTT,Start=19,End=29,#Primer5|Sequence=GGGGACCAGGTGCCGTAAG,St…	GGGGACCAGGTGCCGTAAGCCTCTTTTGTTTTTACTAGAGTTACAACACTGTAAATATTTATAAGCTATGAATAAGTATATACCTCAAAAAACTATATCTACGCTAATTTTACTATGCATACACGATCTTTTGCGATCCTAGGGCGATCA
287	287	4.2965	SetName|SetName=duplicate barcodes hubs#Context|Name=context_term_ins_YDR286C#Element|Name=PE_YDR286C,Type=termination,SubType=PE_YDR286C,Strength=Strong,Orientation=plus,Sequence=AAAAAA,Start=59#Element|Name=EE_YDR286C,Type=termination,SubType=EE_YDR286C,Strength=Strong,Orientation=plus,Sequence=TATATA,Start=69#Barcode|Sequence=AGGAGCACCTT,Start=19,End=29,#Primer5|Sequence=GGGGACCAGGTGCCGTAAG,St…	GGGGACCAGGTGCCGTAAGCCTCTTTTGTTTTTACTAGAGTTACAACACTGTAAATATTTATAAGCTATGAATAAGTATATACCTCAAAAAACTATATCTACGCTAATTTTACTATGCATAAGGAGCACCTTGCGATCCTAGGGCGATCA
288	288	4.1173	SetName|SetName=duplicate barcodes hubs#Context|Name=context_term_ins_YDR286C#Element|Name=PE_YDR286C,Type=termination,SubType=PE_YDR286C,Strength=Strong,Orientation=plus,Sequence=AAAAAA,Start=59#Element|Name=EE_YDR286C,Type=termination,SubType=EE_YDR286C,Strength=Strong,Orientation=plus,Sequence=TATATA,Start=69#Barcode|Sequence=GAAGCCGCGTT,Start=19,End=29,#Primer5|Sequence=GGGGACCAGGTGCCGTAAG,St…	GGGGACCAGGTGCCGTAAGCCTCTTTTGTTTTTACTAGAGTTACAACACTGTAAATATTTATAAGCTATGAATAAGTATATACCTCAAAAAACTATATCTACGCTAATTTTACTATGCATAGAAGCCGCGTTGCGATCCTAGGGCGATCA
289	289	4.0939	SetName|SetName=duplicate barcodes hubs#Context|Name=context_term_ins_YDR286C#Element|Name=PE_YDR286C,Type=termination,SubType=PE_YDR286C,Strength=Strong,Orientation=plus,Sequence=AAAAAA,Start=59#Element|Name=EE_YDR286C,Type=termination,SubType=EE_YDR286C,Strength=Strong,Orientation=plus,Sequence=TATATA,Start=69#Barcode|Sequence=TAGCAGGCTGT,Start=19,End=29,#Primer5|Sequence=GGGGACCAGGTGCCGTAAG,St…	GGGGACCAGGTGCCGTAAGCCTCTTTTGTTTTTACTAGAGTTACAACACTGTAAATATTTATAAGCTATGAATAAGTATATACCTCAAAAAACTATATCTACGCTAATTTTACTATGCATATAGCAGGCTGTGCGATCCTAGGGCGATCA
290	290	4.203	SetName|SetName=duplicate barcodes hubs#Context|Name=context_term_ins_YDR286C#Element|Name=PE_YDR286C,Type=termination,SubType=PE_YDR286C,Strength=Strong,Orientation=plus,Sequence=AAAAAA,Start=59#Element|Name=EE_YDR286C,Type=termination,SubType=EE_YDR286C,Strength=Strong,Orientation=plus,Sequence=TATATA,Start=69#Barcode|Sequence=GTGCCACGAGA,Start=19,End=29,#Primer5|Sequence=GGGGACCAGGTGCCGTAAG,St…	GGGGACCAGGTGCCGTAAGCCTCTTTTGTTTTTACTAGAGTTACAACACTGTAAATATTTATAAGCTATGAATAAGTATATACCTCAAAAAACTATATCTACGCTAATTTTACTATGCATAGTGCCACGAGAGCGATCCTAGGGCGATCA
291	291	3.926	SetName|SetName=duplicate barcodes hubs#Context|Name=context_term_ins_YDR286C#Element|Name=PE_YDR286C,Type=termination,SubType=PE_YDR286C,Strength=Strong,Orientation=plus,Sequence=AAAAAA,Start=59#Element|Name=EE_YDR286C,Type=termination,SubType=EE_YDR286C,Strength=Strong,Orientation=plus,Sequence=TATATA,Start=69#Barcode|Sequence=CCCTTTAGGGA,Start=19,End=29,#Primer5|Sequence=GGGGACCAGGTGCCGTAAG,St…	GGGGACCAGGTGCCGTAAGCCTCTTTTGTTTTTACTAGAGTTACAACACTGTAAATATTTATAAGCTATGAATAAGTATATACCTCAAAAAACTATATCTACGCTAATTTTACTATGCATACCCTTTAGGGAGCGATCCTAGGGCGATCA
292	292	4.1581	SetName|SetName=duplicate barcodes hubs#Context|Name=context_term_ins_YDR286C#Element|Name=PE_YDR286C,Type=termination,SubType=PE_YDR286C,Strength=Strong,Orientation=plus,Sequence=AAAAAA,Start=59#Element|Name=EE_YDR286C,Type=termination,SubType=EE_YDR286C,Strength=Strong,Orientation=plus,Sequence=TATATA,Start=69#Barcode|Sequence=TCTTAGAATAG,Start=19,End=29,#Primer5|Sequence=GGGGACCAGGTGCCGTAAG,St…	GGGGACCAGGTGCCGTAAGCCTCTTTTGTTTTTACTAGAGTTACAACACTGTAAATATTTATAAGCTATGAATAAGTATATACCTCAAAAAACTATATCTACGCTAATTTTACTATGCATATCTTAGAATAGGCGATCCTAGGGCGATCA
293	293	4.0901	SetName|SetName=duplicate barcodes hubs#Context|Name=context_term_ins_YDR286C#Element|Name=PE_YDR286C,Type=termination,SubType=PE_YDR286C,Strength=Strong,Orientation=plus,Sequence=AAAAAA,Start=59#Element|Name=EE_YDR286C,Type=termination,SubType=EE_YDR286C,Strength=Strong,Orientation=plus,Sequence=TATATA,Start=69#Barcode|Sequence=ACTTGTAGTTG,Start=19,End=29,#Primer5|Sequence=GGGGACCAGGTGCCGTAAG,St…	GGGGACCAGGTGCCGTAAGCCTCTTTTGTTTTTACTAGAGTTACAACACTGTAAATATTTATAAGCTATGAATAAGTATATACCTCAAAAAACTATATCTACGCTAATTTTACTATGCATAACTTGTAGTTGGCGATCCTAGGGCGATCA
294	294	4.2053	SetName|SetName=duplicate barcodes hubs#Context|Name=context_term_ins_YDR286C#Element|Name=PE_YDR286C,Type=termination,SubType=PE_YDR286C,Strength=Strong,Orientation=plus,Sequence=AAAAAA,Start=59#Element|Name=EE_YDR286C,Type=termination,SubType=EE_YDR286C,Strength=Strong,Orientation=plus,Sequence=TATATA,Start=69#Barcode|Sequence=GGTTACAACAT,Start=19,End=29,#Primer5|Sequence=GGGGACCAGGTGCCGTAAG,St…	GGGGACCAGGTGCCGTAAGCCTCTTTTGTTTTTACTAGAGTTACAACACTGTAAATATTTATAAGCTATGAATAAGTATATACCTCAAAAAACTATATCTACGCTAATTTTACTATGCATAGGTTACAACATGCGATCCTAGGGCGATCA
295	295	3.9085	SetName|SetName=duplicate barcodes hubs#Context|Name=context_term_ins_YDR286C#Element|Name=PE_YDR286C,Type=termination,SubType=PE_YDR286C,Strength=Strong,Orientation=plus,Sequence=AAAAAA,Start=59#Element|Name=EE_YDR286C,Type=termination,SubType=EE_YDR286C,Strength=Strong,Orientation=plus,Sequence=TATATA,Start=69#Barcode|Sequence=CTAGACTGACC,Start=19,End=29,#Primer5|Sequence=GGGGACCAGGTGCCGTAAG,St…	GGGGACCAGGTGCCGTAAGCCTCTTTTGTTTTTACTAGAGTTACAACACTGTAAATATTTATAAGCTATGAATAAGTATATACCTCAAAAAACTATATCTACGCTAATTTTACTATGCATACTAGACTGACCGCGATCCTAGGGCGATCA
296	296	4.256	SetName|SetName=duplicate barcodes hubs#Context|Name=context_term_ins_YDR286C#Element|Name=PE_YDR286C,Type=termination,SubType=PE_YDR286C,Strength=Strong,Orientation=plus,Sequence=AAAAAA,Start=59#Element|Name=EE_YDR286C,Type=termination,SubType=EE_YDR286C,Strength=Strong,Orientation=plus,Sequence=TATATA,Start=69#Barcode|Sequence=ATGAGCAACAG,Start=19,End=29,#Primer5|Sequence=GGGGACCAGGTGCCGTAAG,St…	GGGGACCAGGTGCCGTAAGCCTCTTTTGTTTTTACTAGAGTTACAACACTGTAAATATTTATAAGCTATGAATAAGTATATACCTCAAAAAACTATATCTACGCTAATTTTACTATGCATAATGAGCAACAGGCGATCCTAGGGCGATCA
297	297	4.1806	SetName|SetName=duplicate barcodes hubs#Context|Name=context_term_ins_YDR286C#Element|Name=PE_YDR286C,Type=termination,SubType=PE_YDR286C,Strength=Strong,Orientation=plus,Sequence=AAAAAA,Start=59#Element|Name=EE_YDR286C,Type=termination,SubType=EE_YDR286C,Strength=Strong,Orientation=plus,Sequence=TATATA,Start=69#Barcode|Sequence=AGGCGGCTTCG,Start=19,End=29,#Primer5|Sequence=GGGGACCAGGTGCCGTAAG,St…	GGGGACCAGGTGCCGTAAGCCTCTTTTGTTTTTACTAGAGTTACAACACTGTAAATATTTATAAGCTATGAATAAGTATATACCTCAAAAAACTATATCTACGCTAATTTTACTATGCATAAGGCGGCTTCGGCGATCCTAGGGCGATCA
298	298	4.371	SetName|SetName=duplicate barcodes hubs#Context|Name=context_term_ins_YDR286C#Element|Name=PE_YDR286C,Type=termination,SubType=PE_YDR286C,Strength=Strong,Orientation=plus,Sequence=AAAAAA,Start=59#Element|Name=EE_YDR286C,Type=termination,SubType=EE_YDR286C,Strength=Strong,Orientation=plus,Sequence=TATATA,Start=69#Barcode|Sequence=TTCGTCGACAG,Start=19,End=29,#Primer5|Sequence=GGGGACCAGGTGCCGTAAG,St…	GGGGACCAGGTGCCGTAAGCCTCTTTTGTTTTTACTAGAGTTACAACACTGTAAATATTTATAAGCTATGAATAAGTATATACCTCAAAAAACTATATCTACGCTAATTTTACTATGCATATTCGTCGACAGGCGATCCTAGGGCGATCA
299	299	3.8693	SetName|SetName=duplicate barcodes hubs#Context|Name=context_term_ins_YDR286C#Element|Name=PE_YDR286C,Type=termination,SubType=PE_YDR286C,Strength=Strong,Orientation=plus,Sequence=AAAAAA,Start=59#Element|Name=EE_YDR286C,Type=termination,SubType=EE_YDR286C,Strength=Strong,Orientation=plus,Sequence=TATATA,Start=69#Barcode|Sequence=CGACCAGATCG,Start=19,End=29,#Primer5|Sequence=GGGGACCAGGTGCCGTAAG,St…	GGGGACCAGGTGCCGTAAGCCTCTTTTGTTTTTACTAGAGTTACAACACTGTAAATATTTATAAGCTATGAATAAGTATATACCTCAAAAAACTATATCTACGCTAATTTTACTATGCATACGACCAGATCGGCGATCCTAGGGCGATCA
300	300	2.5091	SetName|SetName=duplicate barcodes hubs#Context|Name=context_term_ins_YJL095W#Element|Name=PE_YJL095W,Type=termination,SubType=PE_YJL095W,Strength=Strong,Orientation=plus,Sequence=AATAAA,Start=71#Element|Name=EE_YJL095W,Type=termination,SubType=EE_YJL095W,Strength=Strong,Orientation=plus,Sequence=TACGTA,Start=89#Barcode|Sequence=GAAGCGTGCCC,Start=19,End=29,#Primer5|Sequence=GGGGACCAGGTGCCGTAAG,St…	GGGGACCAGGTGCCGTAAGGCTATTAGGATCGATCTATACTTAAGATATTTATGCATACGTAATAATATAGAACAATAAACATAGATGACGGAATGACGGAATGACTGAAAATTAAGAACAGAAGCGTGCCCGCGATCCTAGGGCGATCA
301	301	2.608	SetName|SetName=duplicate barcodes hubs#Context|Name=context_term_ins_YJL095W#Element|Name=PE_YJL095W,Type=termination,SubType=PE_YJL095W,Strength=Strong,Orientation=plus,Sequence=AATAAA,Start=71#Element|Name=EE_YJL095W,Type=termination,SubType=EE_YJL095W,Strength=Strong,Orientation=plus,Sequence=TACGTA,Start=89#Barcode|Sequence=GAAGCTCTTGA,Start=19,End=29,#Primer5|Sequence=GGGGACCAGGTGCCGTAAG,St…	GGGGACCAGGTGCCGTAAGGCTATTAGGATCGATCTATACTTAAGATATTTATGCATACGTAATAATATAGAACAATAAACATAGATGACGGAATGACGGAATGACTGAAAATTAAGAACAGAAGCTCTTGAGCGATCCTAGGGCGATCA
302	302	2.4722	SetName|SetName=duplicate barcodes hubs#Context|Name=context_term_ins_YJL095W#Element|Name=PE_YJL095W,Type=termination,SubType=PE_YJL095W,Strength=Strong,Orientation=plus,Sequence=AATAAA,Start=71#Element|Name=EE_YJL095W,Type=termination,SubType=EE_YJL095W,Strength=Strong,Orientation=plus,Sequence=TACGTA,Start=89#Barcode|Sequence=CTACAGGTGTT,Start=19,End=29,#Primer5|Sequence=GGGGACCAGGTGCCGTAAG,St…	GGGGACCAGGTGCCGTAAGGCTATTAGGATCGATCTATACTTAAGATATTTATGCATACGTAATAATATAGAACAATAAACATAGATGACGGAATGACGGAATGACTGAAAATTAAGAACACTACAGGTGTTGCGATCCTAGGGCGATCA
303	303	2.3968	SetName|SetName=duplicate barcodes hubs#Context|Name=context_term_ins_YJL095W#Element|Name=PE_YJL095W,Type=termination,SubType=PE_YJL095W,Strength=Strong,Orientation=plus,Sequence=AATAAA,Start=71#Element|Name=EE_YJL095W,Type=termination,SubType=EE_YJL095W,Strength=Strong,Orientation=plus,Sequence=TACGTA,Start=89#Barcode|Sequence=TGGTCACCCAT,Start=19,End=29,#Primer5|Sequence=GGGGACCAGGTGCCGTAAG,St…	GGGGACCAGGTGCCGTAAGGCTATTAGGATCGATCTATACTTAAGATATTTATGCATACGTAATAATATAGAACAATAAACATAGATGACGGAATGACGGAATGACTGAAAATTAAGAACATGGTCACCCATGCGATCCTAGGGCGATCA
304	304	2.2594	SetName|SetName=duplicate barcodes hubs#Context|Name=context_term_ins_YJL095W#Element|Name=PE_YJL095W,Type=termination,SubType=PE_YJL095W,Strength=Strong,Orientation=plus,Sequence=AATAAA,Start=71#Element|Name=EE_YJL095W,Type=termination,SubType=EE_YJL095W,Strength=Strong,Orientation=plus,Sequence=TACGTA,Start=89#Barcode|Sequence=CGTCTCTTAAA,Start=19,End=29,#Primer5|Sequence=GGGGACCAGGTGCCGTAAG,St…	GGGGACCAGGTGCCGTAAGGCTATTAGGATCGATCTATACTTAAGATATTTATGCATACGTAATAATATAGAACAATAAACATAGATGACGGAATGACGGAATGACTGAAAATTAAGAACACGTCTCTTAAAGCGATCCTAGGGCGATCA
305	305	2.5179	SetName|SetName=duplicate barcodes hubs#Context|Name=context_term_ins_YJL095W#Element|Name=PE_YJL095W,Type=termination,SubType=PE_YJL095W,Strength=Strong,Orientation=plus,Sequence=AATAAA,Start=71#Element|Name=EE_YJL095W,Type=termination,SubType=EE_YJL095W,Strength=Strong,Orientation=plus,Sequence=TACGTA,Start=89#Barcode|Sequence=TACTGAACTTC,Start=19,End=29,#Primer5|Sequence=GGGGACCAGGTGCCGTAAG,St…	GGGGACCAGGTGCCGTAAGGCTATTAGGATCGATCTATACTTAAGATATTTATGCATACGTAATAATATAGAACAATAAACATAGATGACGGAATGACGGAATGACTGAAAATTAAGAACATACTGAACTTCGCGATCCTAGGGCGATCA
306	306	2.4464	SetName|SetName=duplicate barcodes hubs#Context|Name=context_term_ins_YJL095W#Element|Name=PE_YJL095W,Type=termination,SubType=PE_YJL095W,Strength=Strong,Orientation=plus,Sequence=AATAAA,Start=71#Element|Name=EE_YJL095W,Type=termination,SubType=EE_YJL095W,Strength=Strong,Orientation=plus,Sequence=TACGTA,Start=89#Barcode|Sequence=ACTTACAAGTT,Start=19,End=29,#Primer5|Sequence=GGGGACCAGGTGCCGTAAG,St…	GGGGACCAGGTGCCGTAAGGCTATTAGGATCGATCTATACTTAAGATATTTATGCATACGTAATAATATAGAACAATAAACATAGATGACGGAATGACGGAATGACTGAAAATTAAGAACAACTTACAAGTTGCGATCCTAGGGCGATCA
307	307	2.1455	SetName|SetName=duplicate barcodes hubs#Context|Name=context_term_ins_YJL095W#Element|Name=PE_YJL095W,Type=termination,SubType=PE_YJL095W,Strength=Strong,Orientation=plus,Sequence=AATAAA,Start=71#Element|Name=EE_YJL095W,Type=termination,SubType=EE_YJL095W,Strength=Strong,Orientation=plus,Sequence=TACGTA,Start=89#Barcode|Sequence=TCATGGTGCAC,Start=19,End=29,#Primer5|Sequence=GGGGACCAGGTGCCGTAAG,St…	GGGGACCAGGTGCCGTAAGGCTATTAGGATCGATCTATACTTAAGATATTTATGCATACGTAATAATATAGAACAATAAACATAGATGACGGAATGACGGAATGACTGAAAATTAAGAACATCATGGTGCACGCGATCCTAGGGCGATCA
308	308	2.5017	SetName|SetName=duplicate barcodes hubs#Context|Name=context_term_ins_YJL095W#Element|Name=PE_YJL095W,Type=termination,SubType=PE_YJL095W,Strength=Strong,Orientation=plus,Sequence=AATAAA,Start=71#Element|Name=EE_YJL095W,Type=termination,SubType=EE_YJL095W,Strength=Strong,Orientation=plus,Sequence=TACGTA,Start=89#Barcode|Sequence=AGTAAGAGTAA,Start=19,End=29,#Primer5|Sequence=GGGGACCAGGTGCCGTAAG,St…	GGGGACCAGGTGCCGTAAGGCTATTAGGATCGATCTATACTTAAGATATTTATGCATACGTAATAATATAGAACAATAAACATAGATGACGGAATGACGGAATGACTGAAAATTAAGAACAAGTAAGAGTAAGCGATCCTAGGGCGATCA
309	309	2.9067	SetName|SetName=duplicate barcodes hubs#Context|Name=context_term_ins_YJL095W#Element|Name=PE_YJL095W,Type=termination,SubType=PE_YJL095W,Strength=Strong,Orientation=plus,Sequence=AATAAA,Start=71#Element|Name=EE_YJL095W,Type=termination,SubType=EE_YJL095W,Strength=Strong,Orientation=plus,Sequence=TACGTA,Start=89#Barcode|Sequence=GACCTGGGCCT,Start=19,End=29,#Primer5|Sequence=GGGGACCAGGTGCCGTAAG,St…	GGGGACCAGGTGCCGTAAGGCTATTAGGATCGATCTATACTTAAGATATTTATGCATACGTAATAATATAGAACAATAAACATAGATGACGGAATGACGGAATGACTGAAAATTAAGAACAGACCTGGGCCTGCGATCCTAGGGCGATCA
310	310	2.4772	SetName|SetName=duplicate barcodes hubs#Context|Name=context_term_ins_YJL095W#Element|Name=PE_YJL095W,Type=termination,SubType=PE_YJL095W,Strength=Strong,Orientation=plus,Sequence=AATAAA,Start=71#Element|Name=EE_YJL095W,Type=termination,SubType=EE_YJL095W,Strength=Strong,Orientation=plus,Sequence=TACGTA,Start=89#Barcode|Sequence=GAGATTCTTCT,Start=19,End=29,#Primer5|Sequence=GGGGACCAGGTGCCGTAAG,St…	GGGGACCAGGTGCCGTAAGGCTATTAGGATCGATCTATACTTAAGATATTTATGCATACGTAATAATATAGAACAATAAACATAGATGACGGAATGACGGAATGACTGAAAATTAAGAACAGAGATTCTTCTGCGATCCTAGGGCGATCA
311	311	2.4556	SetName|SetName=duplicate barcodes hubs#Context|Name=context_term_ins_YJL095W#Element|Name=PE_YJL095W,Type=termination,SubType=PE_YJL095W,Strength=Strong,Orientation=plus,Sequence=AATAAA,Start=71#Element|Name=EE_YJL095W,Type=termination,SubType=EE_YJL095W,Strength=Strong,Orientation=plus,Sequence=TACGTA,Start=89#Barcode|Sequence=GTTAACGCTGG,Start=19,End=29,#Primer5|Sequence=GGGGACCAGGTGCCGTAAG,St…	GGGGACCAGGTGCCGTAAGGCTATTAGGATCGATCTATACTTAAGATATTTATGCATACGTAATAATATAGAACAATAAACATAGATGACGGAATGACGGAATGACTGAAAATTAAGAACAGTTAACGCTGGGCGATCCTAGGGCGATCA
312	312	2.346	SetName|SetName=duplicate barcodes hubs#Context|Name=context_term_ins_YJL095W#Element|Name=PE_YJL095W,Type=termination,SubType=PE_YJL095W,Strength=Strong,Orientation=plus,Sequence=AATAAA,Start=71#Element|Name=EE_YJL095W,Type=termination,SubType=EE_YJL095W,Strength=Strong,Orientation=plus,Sequence=TACGTA,Start=89#Barcode|Sequence=TCAACGAAATG,Start=19,End=29,#Primer5|Sequence=GGGGACCAGGTGCCGTAAG,St…	GGGGACCAGGTGCCGTAAGGCTATTAGGATCGATCTATACTTAAGATATTTATGCATACGTAATAATATAGAACAATAAACATAGATGACGGAATGACGGAATGACTGAAAATTAAGAACATCAACGAAATGGCGATCCTAGGGCGATCA
313	313	2.6864	SetName|SetName=duplicate barcodes hubs#Context|Name=context_term_ins_YJL095W#Element|Name=PE_YJL095W,Type=termination,SubType=PE_YJL095W,Strength=Strong,Orientation=plus,Sequence=AATAAA,Start=71#Element|Name=EE_YJL095W,Type=termination,SubType=EE_YJL095W,Strength=Strong,Orientation=plus,Sequence=TACGTA,Start=89#Barcode|Sequence=ATTGAGTAGTG,Start=19,End=29,#Primer5|Sequence=GGGGACCAGGTGCCGTAAG,St…	GGGGACCAGGTGCCGTAAGGCTATTAGGATCGATCTATACTTAAGATATTTATGCATACGTAATAATATAGAACAATAAACATAGATGACGGAATGACGGAATGACTGAAAATTAAGAACAATTGAGTAGTGGCGATCCTAGGGCGATCA
314	314	2.8125	SetName|SetName=duplicate barcodes hubs#Context|Name=context_term_ins_YJL095W#Element|Name=PE_YJL095W,Type=termination,SubType=PE_YJL095W,Strength=Strong,Orientation=plus,Sequence=AATAAA,Start=71#Element|Name=EE_YJL095W,Type=termination,SubType=EE_YJL095W,Strength=Strong,Orientation=plus,Sequence=TACGTA,Start=89#Barcode|Sequence=GAGATCGCTAT,Start=19,End=29,#Primer5|Sequence=GGGGACCAGGTGCCGTAAG,St…	GGGGACCAGGTGCCGTAAGGCTATTAGGATCGATCTATACTTAAGATATTTATGCATACGTAATAATATAGAACAATAAACATAGATGACGGAATGACGGAATGACTGAAAATTAAGAACAGAGATCGCTATGCGATCCTAGGGCGATCA
315	315	2.4439	SetName|SetName=duplicate barcodes hubs#Context|Name=context_term_ins_YJL095W#Element|Name=PE_YJL095W,Type=termination,SubType=PE_YJL095W,Strength=Strong,Orientation=plus,Sequence=AATAAA,Start=71#Element|Name=EE_YJL095W,Type=termination,SubType=EE_YJL095W,Strength=Strong,Orientation=plus,Sequence=TACGTA,Start=89#Barcode|Sequence=TTGTAAGCGCC,Start=19,End=29,#Primer5|Sequence=GGGGACCAGGTGCCGTAAG,St…	GGGGACCAGGTGCCGTAAGGCTATTAGGATCGATCTATACTTAAGATATTTATGCATACGTAATAATATAGAACAATAAACATAGATGACGGAATGACGGAATGACTGAAAATTAAGAACATTGTAAGCGCCGCGATCCTAGGGCGATCA
316	316	2.5306	SetName|SetName=duplicate barcodes hubs#Context|Name=context_term_ins_YJL095W#Element|Name=PE_YJL095W,Type=termination,SubType=PE_YJL095W,Strength=Strong,Orientation=plus,Sequence=AATAAA,Start=71#Element|Name=EE_YJL095W,Type=termination,SubType=EE_YJL095W,Strength=Strong,Orientation=plus,Sequence=TACGTA,Start=89#Barcode|Sequence=GTGTCCGAAGG,Start=19,End=29,#Primer5|Sequence=GGGGACCAGGTGCCGTAAG,St…	GGGGACCAGGTGCCGTAAGGCTATTAGGATCGATCTATACTTAAGATATTTATGCATACGTAATAATATAGAACAATAAACATAGATGACGGAATGACGGAATGACTGAAAATTAAGAACAGTGTCCGAAGGGCGATCCTAGGGCGATCA
317	317	2.5883	SetName|SetName=duplicate barcodes hubs#Context|Name=context_term_ins_YJL095W#Element|Name=PE_YJL095W,Type=termination,SubType=PE_YJL095W,Strength=Strong,Orientation=plus,Sequence=AATAAA,Start=71#Element|Name=EE_YJL095W,Type=termination,SubType=EE_YJL095W,Strength=Strong,Orientation=plus,Sequence=TACGTA,Start=89#Barcode|Sequence=GAGCTTCGGTG,Start=19,End=29,#Primer5|Sequence=GGGGACCAGGTGCCGTAAG,St…	GGGGACCAGGTGCCGTAAGGCTATTAGGATCGATCTATACTTAAGATATTTATGCATACGTAATAATATAGAACAATAAACATAGATGACGGAATGACGGAATGACTGAAAATTAAGAACAGAGCTTCGGTGGCGATCCTAGGGCGATCA
318	318	2.4519	SetName|SetName=duplicate barcodes hubs#Context|Name=context_term_ins_YJL095W#Element|Name=PE_YJL095W,Type=termination,SubType=PE_YJL095W,Strength=Strong,Orientation=plus,Sequence=AATAAA,Start=71#Element|Name=EE_YJL095W,Type=termination,SubType=EE_YJL095W,Strength=Strong,Orientation=plus,Sequence=TACGTA,Start=89#Barcode|Sequence=TGCTCCAACAG,Start=19,End=29,#Primer5|Sequence=GGGGACCAGGTGCCGTAAG,St…	GGGGACCAGGTGCCGTAAGGCTATTAGGATCGATCTATACTTAAGATATTTATGCATACGTAATAATATAGAACAATAAACATAGATGACGGAATGACGGAATGACTGAAAATTAAGAACATGCTCCAACAGGCGATCCTAGGGCGATCA
319	319	2.3903	SetName|SetName=duplicate barcodes hubs#Context|Name=context_term_ins_YJL095W#Element|Name=PE_YJL095W,Type=termination,SubType=PE_YJL095W,Strength=Strong,Orientation=plus,Sequence=AATAAA,Start=71#Element|Name=EE_YJL095W,Type=termination,SubType=EE_YJL095W,Strength=Strong,Orientation=plus,Sequence=TACGTA,Start=89#Barcode|Sequence=GACGCTCATTA,Start=19,End=29,#Primer5|Sequence=GGGGACCAGGTGCCGTAAG,St…	GGGGACCAGGTGCCGTAAGGCTATTAGGATCGATCTATACTTAAGATATTTATGCATACGTAATAATATAGAACAATAAACATAGATGACGGAATGACGGAATGACTGAAAATTAAGAACAGACGCTCATTAGCGATCCTAGGGCGATCA
320	320	3.4319	SetName|SetName=duplicate barcodes hubs#Context|Name=context_term_ins_YLR044C#Element|Name=PE_YLR044C,Type=termination,SubType=PE_YLR044C,Strength=Strong,Orientation=plus,Sequence=AATAAA,Start=70#Element|Name=EE_YLR044C,Type=termination,SubType=EE_YLR044C,Strength=Strong,Orientation=plus,Sequence=TATGTA,Start=82#Barcode|Sequence=CTGTAGGTCGT,Start=19,End=29,#Primer5|Sequence=GGGGACCAGGTGCCGTAAG,St…	GGGGACCAGGTGCCGTAAGGCGATTTAATCTCTAATTATTAGTTAAAGTTTTATAAGCATTTTTATGTAACGAAAAATAAATTGGTTCATATTATTACTGCACTGTCACTTACCATGGAAACTGTAGGTCGTGCGATCCTAGGGCGATCA
321	321	3.4247	SetName|SetName=duplicate barcodes hubs#Context|Name=context_term_ins_YLR044C#Element|Name=PE_YLR044C,Type=termination,SubType=PE_YLR044C,Strength=Strong,Orientation=plus,Sequence=AATAAA,Start=70#Element|Name=EE_YLR044C,Type=termination,SubType=EE_YLR044C,Strength=Strong,Orientation=plus,Sequence=TATGTA,Start=82#Barcode|Sequence=TACAACCCGTC,Start=19,End=29,#Primer5|Sequence=GGGGACCAGGTGCCGTAAG,St…	GGGGACCAGGTGCCGTAAGGCGATTTAATCTCTAATTATTAGTTAAAGTTTTATAAGCATTTTTATGTAACGAAAAATAAATTGGTTCATATTATTACTGCACTGTCACTTACCATGGAAATACAACCCGTCGCGATCCTAGGGCGATCA
322	322	3.5058	SetName|SetName=duplicate barcodes hubs#Context|Name=context_term_ins_YLR044C#Element|Name=PE_YLR044C,Type=termination,SubType=PE_YLR044C,Strength=Strong,Orientation=plus,Sequence=AATAAA,Start=70#Element|Name=EE_YLR044C,Type=termination,SubType=EE_YLR044C,Strength=Strong,Orientation=plus,Sequence=TATGTA,Start=82#Barcode|Sequence=GATTGAGACTG,Start=19,End=29,#Primer5|Sequence=GGGGACCAGGTGCCGTAAG,St…	GGGGACCAGGTGCCGTAAGGCGATTTAATCTCTAATTATTAGTTAAAGTTTTATAAGCATTTTTATGTAACGAAAAATAAATTGGTTCATATTATTACTGCACTGTCACTTACCATGGAAAGATTGAGACTGGCGATCCTAGGGCGATCA
323	323	3.315	SetName|SetName=duplicate barcodes hubs#Context|Name=context_term_ins_YLR044C#Element|Name=PE_YLR044C,Type=termination,SubType=PE_YLR044C,Strength=Strong,Orientation=plus,Sequence=AATAAA,Start=70#Element|Name=EE_YLR044C,Type=termination,SubType=EE_YLR044C,Strength=Strong,Orientation=plus,Sequence=TATGTA,Start=82#Barcode|Sequence=GTTGAGATCGC,Start=19,End=29,#Primer5|Sequence=GGGGACCAGGTGCCGTAAG,St…	GGGGACCAGGTGCCGTAAGGCGATTTAATCTCTAATTATTAGTTAAAGTTTTATAAGCATTTTTATGTAACGAAAAATAAATTGGTTCATATTATTACTGCACTGTCACTTACCATGGAAAGTTGAGATCGCGCGATCCTAGGGCGATCA
324	324	3.4223	SetName|SetName=duplicate barcodes hubs#Context|Name=context_term_ins_YLR044C#Element|Name=PE_YLR044C,Type=termination,SubType=PE_YLR044C,Strength=Strong,Orientation=plus,Sequence=AATAAA,Start=70#Element|Name=EE_YLR044C,Type=termination,SubType=EE_YLR044C,Strength=Strong,Orientation=plus,Sequence=TATGTA,Start=82#Barcode|Sequence=GTACTTCTACA,Start=19,End=29,#Primer5|Sequence=GGGGACCAGGTGCCGTAAG,St…	GGGGACCAGGTGCCGTAAGGCGATTTAATCTCTAATTATTAGTTAAAGTTTTATAAGCATTTTTATGTAACGAAAAATAAATTGGTTCATATTATTACTGCACTGTCACTTACCATGGAAAGTACTTCTACAGCGATCCTAGGGCGATCA
325	325	3.324	SetName|SetName=duplicate barcodes hubs#Context|Name=context_term_ins_YLR044C#Element|Name=PE_YLR044C,Type=termination,SubType=PE_YLR044C,Strength=Strong,Orientation=plus,Sequence=AATAAA,Start=70#Element|Name=EE_YLR044C,Type=termination,SubType=EE_YLR044C,Strength=Strong,Orientation=plus,Sequence=TATGTA,Start=82#Barcode|Sequence=TATTTACTACG,Start=19,End=29,#Primer5|Sequence=GGGGACCAGGTGCCGTAAG,St…	GGGGACCAGGTGCCGTAAGGCGATTTAATCTCTAATTATTAGTTAAAGTTTTATAAGCATTTTTATGTAACGAAAAATAAATTGGTTCATATTATTACTGCACTGTCACTTACCATGGAAATATTTACTACGGCGATCCTAGGGCGATCA
326	326	3.5229	SetName|SetName=duplicate barcodes hubs#Context|Name=context_term_ins_YLR044C#Element|Name=PE_YLR044C,Type=termination,SubType=PE_YLR044C,Strength=Strong,Orientation=plus,Sequence=AATAAA,Start=70#Element|Name=EE_YLR044C,Type=termination,SubType=EE_YLR044C,Strength=Strong,Orientation=plus,Sequence=TATGTA,Start=82#Barcode|Sequence=CAATCACGATA,Start=19,End=29,#Primer5|Sequence=GGGGACCAGGTGCCGTAAG,St…	GGGGACCAGGTGCCGTAAGGCGATTTAATCTCTAATTATTAGTTAAAGTTTTATAAGCATTTTTATGTAACGAAAAATAAATTGGTTCATATTATTACTGCACTGTCACTTACCATGGAAACAATCACGATAGCGATCCTAGGGCGATCA
327	327	3.4545	SetName|SetName=duplicate barcodes hubs#Context|Name=context_term_ins_YLR044C#Element|Name=PE_YLR044C,Type=termination,SubType=PE_YLR044C,Strength=Strong,Orientation=plus,Sequence=AATAAA,Start=70#Element|Name=EE_YLR044C,Type=termination,SubType=EE_YLR044C,Strength=Strong,Orientation=plus,Sequence=TATGTA,Start=82#Barcode|Sequence=TCATGCGGTCA,Start=19,End=29,#Primer5|Sequence=GGGGACCAGGTGCCGTAAG,St…	GGGGACCAGGTGCCGTAAGGCGATTTAATCTCTAATTATTAGTTAAAGTTTTATAAGCATTTTTATGTAACGAAAAATAAATTGGTTCATATTATTACTGCACTGTCACTTACCATGGAAATCATGCGGTCAGCGATCCTAGGGCGATCA
328	328	3.4163	SetName|SetName=duplicate barcodes hubs#Context|Name=context_term_ins_YLR044C#Element|Name=PE_YLR044C,Type=termination,SubType=PE_YLR044C,Strength=Strong,Orientation=plus,Sequence=AATAAA,Start=70#Element|Name=EE_YLR044C,Type=termination,SubType=EE_YLR044C,Strength=Strong,Orientation=plus,Sequence=TATGTA,Start=82#Barcode|Sequence=ACGTCAGGCTA,Start=19,End=29,#Primer5|Sequence=GGGGACCAGGTGCCGTAAG,St…	GGGGACCAGGTGCCGTAAGGCGATTTAATCTCTAATTATTAGTTAAAGTTTTATAAGCATTTTTATGTAACGAAAAATAAATTGGTTCATATTATTACTGCACTGTCACTTACCATGGAAAACGTCAGGCTAGCGATCCTAGGGCGATCA
329	329	3.8812	SetName|SetName=duplicate barcodes hubs#Context|Name=context_term_ins_YLR044C#Element|Name=PE_YLR044C,Type=termination,SubType=PE_YLR044C,Strength=Strong,Orientation=plus,Sequence=AATAAA,Start=70#Element|Name=EE_YLR044C,Type=termination,SubType=EE_YLR044C,Strength=Strong,Orientation=plus,Sequence=TATGTA,Start=82#Barcode|Sequence=GCAACGCGAGC,Start=19,End=29,#Primer5|Sequence=GGGGACCAGGTGCCGTAAG,St…	GGGGACCAGGTGCCGTAAGGCGATTTAATCTCTAATTATTAGTTAAAGTTTTATAAGCATTTTTATGTAACGAAAAATAAATTGGTTCATATTATTACTGCACTGTCACTTACCATGGAAAGCAACGCGAGCGCGATCCTAGGGCGATCA
330	330	3.7562	SetName|SetName=duplicate barcodes hubs#Context|Name=context_term_ins_YLR044C#Element|Name=PE_YLR044C,Type=termination,SubType=PE_YLR044C,Strength=Strong,Orientation=plus,Sequence=AATAAA,Start=70#Element|Name=EE_YLR044C,Type=termination,SubType=EE_YLR044C,Strength=Strong,Orientation=plus,Sequence=TATGTA,Start=82#Barcode|Sequence=AGTCTACACCA,Start=19,End=29,#Primer5|Sequence=GGGGACCAGGTGCCGTAAG,St…	GGGGACCAGGTGCCGTAAGGCGATTTAATCTCTAATTATTAGTTAAAGTTTTATAAGCATTTTTATGTAACGAAAAATAAATTGGTTCATATTATTACTGCACTGTCACTTACCATGGAAAAGTCTACACCAGCGATCCTAGGGCGATCA
331	331	3.4628	SetName|SetName=duplicate barcodes hubs#Context|Name=context_term_ins_YLR044C#Element|Name=PE_YLR044C,Type=termination,SubType=PE_YLR044C,Strength=Strong,Orientation=plus,Sequence=AATAAA,Start=70#Element|Name=EE_YLR044C,Type=termination,SubType=EE_YLR044C,Strength=Strong,Orientation=plus,Sequence=TATGTA,Start=82#Barcode|Sequence=TTAACGGTCGA,Start=19,End=29,#Primer5|Sequence=GGGGACCAGGTGCCGTAAG,St…	GGGGACCAGGTGCCGTAAGGCGATTTAATCTCTAATTATTAGTTAAAGTTTTATAAGCATTTTTATGTAACGAAAAATAAATTGGTTCATATTATTACTGCACTGTCACTTACCATGGAAATTAACGGTCGAGCGATCCTAGGGCGATCA
332	332	3.5248	SetName|SetName=duplicate barcodes hubs#Context|Name=context_term_ins_YLR044C#Element|Name=PE_YLR044C,Type=termination,SubType=PE_YLR044C,Strength=Strong,Orientation=plus,Sequence=AATAAA,Start=70#Element|Name=EE_YLR044C,Type=termination,SubType=EE_YLR044C,Strength=Strong,Orientation=plus,Sequence=TATGTA,Start=82#Barcode|Sequence=TGGAGGTGCCA,Start=19,End=29,#Primer5|Sequence=GGGGACCAGGTGCCGTAAG,St…	GGGGACCAGGTGCCGTAAGGCGATTTAATCTCTAATTATTAGTTAAAGTTTTATAAGCATTTTTATGTAACGAAAAATAAATTGGTTCATATTATTACTGCACTGTCACTTACCATGGAAATGGAGGTGCCAGCGATCCTAGGGCGATCA
333	333	3.4909	SetName|SetName=duplicate barcodes hubs#Context|Name=context_term_ins_YLR044C#Element|Name=PE_YLR044C,Type=termination,SubType=PE_YLR044C,Strength=Strong,Orientation=plus,Sequence=AATAAA,Start=70#Element|Name=EE_YLR044C,Type=termination,SubType=EE_YLR044C,Strength=Strong,Orientation=plus,Sequence=TATGTA,Start=82#Barcode|Sequence=TGACTAGTAAA,Start=19,End=29,#Primer5|Sequence=GGGGACCAGGTGCCGTAAG,St…	GGGGACCAGGTGCCGTAAGGCGATTTAATCTCTAATTATTAGTTAAAGTTTTATAAGCATTTTTATGTAACGAAAAATAAATTGGTTCATATTATTACTGCACTGTCACTTACCATGGAAATGACTAGTAAAGCGATCCTAGGGCGATCA
334	334	3.5216	SetName|SetName=duplicate barcodes hubs#Context|Name=context_term_ins_YLR044C#Element|Name=PE_YLR044C,Type=termination,SubType=PE_YLR044C,Strength=Strong,Orientation=plus,Sequence=AATAAA,Start=70#Element|Name=EE_YLR044C,Type=termination,SubType=EE_YLR044C,Strength=Strong,Orientation=plus,Sequence=TATGTA,Start=82#Barcode|Sequence=CCTACTGGTCG,Start=19,End=29,#Primer5|Sequence=GGGGACCAGGTGCCGTAAG,St…	GGGGACCAGGTGCCGTAAGGCGATTTAATCTCTAATTATTAGTTAAAGTTTTATAAGCATTTTTATGTAACGAAAAATAAATTGGTTCATATTATTACTGCACTGTCACTTACCATGGAAACCTACTGGTCGGCGATCCTAGGGCGATCA
335	335	3.3407	SetName|SetName=duplicate barcodes hubs#Context|Name=context_term_ins_YLR044C#Element|Name=PE_YLR044C,Type=termination,SubType=PE_YLR044C,Strength=Strong,Orientation=plus,Sequence=AATAAA,Start=70#Element|Name=EE_YLR044C,Type=termination,SubType=EE_YLR044C,Strength=Strong,Orientation=plus,Sequence=TATGTA,Start=82#Barcode|Sequence=AAGGACGACCG,Start=19,End=29,#Primer5|Sequence=GGGGACCAGGTGCCGTAAG,St…	GGGGACCAGGTGCCGTAAGGCGATTTAATCTCTAATTATTAGTTAAAGTTTTATAAGCATTTTTATGTAACGAAAAATAAATTGGTTCATATTATTACTGCACTGTCACTTACCATGGAAAAAGGACGACCGGCGATCCTAGGGCGATCA
336	336	3.395	SetName|SetName=duplicate barcodes hubs#Context|Name=context_term_ins_YLR044C#Element|Name=PE_YLR044C,Type=termination,SubType=PE_YLR044C,Strength=Strong,Orientation=plus,Sequence=AATAAA,Start=70#Element|Name=EE_YLR044C,Type=termination,SubType=EE_YLR044C,Strength=Strong,Orientation=plus,Sequence=TATGTA,Start=82#Barcode|Sequence=CGACTCAGGAG,Start=19,End=29,#Primer5|Sequence=GGGGACCAGGTGCCGTAAG,St…	GGGGACCAGGTGCCGTAAGGCGATTTAATCTCTAATTATTAGTTAAAGTTTTATAAGCATTTTTATGTAACGAAAAATAAATTGGTTCATATTATTACTGCACTGTCACTTACCATGGAAACGACTCAGGAGGCGATCCTAGGGCGATCA
337	337	3.4979	SetName|SetName=duplicate barcodes hubs#Context|Name=context_term_ins_YLR044C#Element|Name=PE_YLR044C,Type=termination,SubType=PE_YLR044C,Strength=Strong,Orientation=plus,Sequence=AATAAA,Start=70#Element|Name=EE_YLR044C,Type=termination,SubType=EE_YLR044C,Strength=Strong,Orientation=plus,Sequence=TATGTA,Start=82#Barcode|Sequence=ATCTGTAATCA,Start=19,End=29,#Primer5|Sequence=GGGGACCAGGTGCCGTAAG,St…	GGGGACCAGGTGCCGTAAGGCGATTTAATCTCTAATTATTAGTTAAAGTTTTATAAGCATTTTTATGTAACGAAAAATAAATTGGTTCATATTATTACTGCACTGTCACTTACCATGGAAAATCTGTAATCAGCGATCCTAGGGCGATCA
338	338	3.4402	SetName|SetName=duplicate barcodes hubs#Context|Name=context_term_ins_YLR044C#Element|Name=PE_YLR044C,Type=termination,SubType=PE_YLR044C,Strength=Strong,Orientation=plus,Sequence=AATAAA,Start=70#Element|Name=EE_YLR044C,Type=termination,SubType=EE_YLR044C,Strength=Strong,Orientation=plus,Sequence=TATGTA,Start=82#Barcode|Sequence=AGACGGACTAG,Start=19,End=29,#Primer5|Sequence=GGGGACCAGGTGCCGTAAG,St…	GGGGACCAGGTGCCGTAAGGCGATTTAATCTCTAATTATTAGTTAAAGTTTTATAAGCATTTTTATGTAACGAAAAATAAATTGGTTCATATTATTACTGCACTGTCACTTACCATGGAAAAGACGGACTAGGCGATCCTAGGGCGATCA
339	339	3.4097	SetName|SetName=duplicate barcodes hubs#Context|Name=context_term_ins_YLR044C#Element|Name=PE_YLR044C,Type=termination,SubType=PE_YLR044C,Strength=Strong,Orientation=plus,Sequence=AATAAA,Start=70#Element|Name=EE_YLR044C,Type=termination,SubType=EE_YLR044C,Strength=Strong,Orientation=plus,Sequence=TATGTA,Start=82#Barcode|Sequence=GCCTGAAAGCA,Start=19,End=29,#Primer5|Sequence=GGGGACCAGGTGCCGTAAG,St…	GGGGACCAGGTGCCGTAAGGCGATTTAATCTCTAATTATTAGTTAAAGTTTTATAAGCATTTTTATGTAACGAAAAATAAATTGGTTCATATTATTACTGCACTGTCACTTACCATGGAAAGCCTGAAAGCAGCGATCCTAGGGCGATCA
340	340		SetName|SetName=duplicate barcodes hubs#Context|Name=context_RBPStemLoop1#Element|Name=GuoMCB96Terminator,Type=Terminator,SubType=GuoMCB96Terminator,Strength=Strong,Orientation=plus,Sequence=TATATAACTGTCTAGAAATAAAGAGTATCATCTTTCAAA,Start=30#Barcode|Sequence=AGTGAATCGAT,Start=19,End=29,#Primer5|Sequence=GGGGACCAGGTGCCGTAAG,Start=132,End=150,#Primer3|Sequence=GCGATCCTAGGGCGATCA,Start=1,End=18,	GGGGACCAGGTGCCGTAAGCTAGACTTTGCCAACGCGTTACTTGGTACAAAAACTAGGTAACGCGTTGGCAAAGTCTACTTCTATATAACTGTCTAGAAATAAAGAGTATCATCTTTCAAAAGTGAATCGATGCGATCCTAGGGCGATCA
341	341		SetName|SetName=duplicate barcodes hubs#Context|Name=context_RBPStemLoop2#Element|Name=GuoMCB96Terminator,Type=Terminator,SubType=GuoMCB96Terminator,Strength=Strong,Orientation=plus,Sequence=TATATAACTGTCTAGAAATAAAGAGTATCATCTTTCAAA,Start=30#Barcode|Sequence=CAAGGCTCTCC,Start=19,End=29,#Primer5|Sequence=GGGGACCAGGTGCCGTAAG,Start=132,End=150,#Primer3|Sequence=GCGATCCTAGGGCGATCA,Start=1,End=18,	GGGGACCAGGTGCCGTAAGTAGTCACTGAGTTCACATGGCTTATGGTTTAAACCGTAAGCCATGTGAACTCAGTGACTTCACTATATAACTGTCTAGAAATAAAGAGTATCATCTTTCAAACAAGGCTCTCCGCGATCCTAGGGCGATCA
342	342		SetName|SetName=duplicate barcodes hubs#Context|Name=context_RBPStemLoop3#Element|Name=GuoMCB96Terminator,Type=Terminator,SubType=GuoMCB96Terminator,Strength=Strong,Orientation=plus,Sequence=TATATAACTGTCTAGAAATAAAGAGTATCATCTTTCAAA,Start=30#Barcode|Sequence=GGTCTCTCTAA,Start=19,End=29,#Primer5|Sequence=GGGGACCAGGTGCCGTAAG,Start=132,End=150,#Primer3|Sequence=GCGATCCTAGGGCGATCA,Start=1,End=18,	GGGGACCAGGTGCCGTAAGTCCATCACGAGAAGTTCAAGCTGTTTCCTTAGTAAAGAAGCTTGAACTTCTCGTGATGCTTACTATATAACTGTCTAGAAATAAAGAGTATCATCTTTCAAAGGTCTCTCTAAGCGATCCTAGGGCGATCA
343	343	1.774	SetName|SetName=duplicate barcodes hubs#Context|Name=context_RBPStemLoop1#Element|Name=GuoMCB96Terminator,Type=Terminator,SubType=GuoMCB96Terminator,Strength=Strong,Orientation=plus,Sequence=TATATAACTGTCTAGAAATAAAGAGTATCATCTTTCAAA,Start=30#Barcode|Sequence=CAGCGCTAGTG,Start=19,End=29,#Primer5|Sequence=GGGGACCAGGTGCCGTAAG,Start=132,End=150,#Primer3|Sequence=GCGATCCTAGGGCGATCA,Start=1,End=18,	GGGGACCAGGTGCCGTAAGCTAGACTTTGCCAACGCGTTACTTGGTACAAAAACTAGGTAACGCGTTGGCAAAGTCTACTTCTATATAACTGTCTAGAAATAAAGAGTATCATCTTTCAAACAGCGCTAGTGGCGATCCTAGGGCGATCA
344	344		SetName|SetName=duplicate barcodes hubs#Context|Name=context_RBPStemLoop2#Element|Name=GuoMCB96Terminator,Type=Terminator,SubType=GuoMCB96Terminator,Strength=Strong,Orientation=plus,Sequence=TATATAACTGTCTAGAAATAAAGAGTATCATCTTTCAAA,Start=30#Barcode|Sequence=AATACAGCGAA,Start=19,End=29,#Primer5|Sequence=GGGGACCAGGTGCCGTAAG,Start=132,End=150,#Primer3|Sequence=GCGATCCTAGGGCGATCA,Start=1,End=18,	GGGGACCAGGTGCCGTAAGTAGTCACTGAGTTCACATGGCTTATGGTTTAAACCGTAAGCCATGTGAACTCAGTGACTTCACTATATAACTGTCTAGAAATAAAGAGTATCATCTTTCAAAAATACAGCGAAGCGATCCTAGGGCGATCA
345	345	0.3602	SetName|SetName=duplicate barcodes hubs#Context|Name=context_RBPStemLoop3#Element|Name=GuoMCB96Terminator,Type=Terminator,SubType=GuoMCB96Terminator,Strength=Strong,Orientation=plus,Sequence=TATATAACTGTCTAGAAATAAAGAGTATCATCTTTCAAA,Start=30#Barcode|Sequence=GGGCTACTATG,Start=19,End=29,#Primer5|Sequence=GGGGACCAGGTGCCGTAAG,Start=132,End=150,#Primer3|Sequence=GCGATCCTAGGGCGATCA,Start=1,End=18,	GGGGACCAGGTGCCGTAAGTCCATCACGAGAAGTTCAAGCTGTTTCCTTAGTAAAGAAGCTTGAACTTCTCGTGATGCTTACTATATAACTGTCTAGAAATAAAGAGTATCATCTTTCAAAGGGCTACTATGGCGATCCTAGGGCGATCA
346	346		SetName|SetName=duplicate barcodes hubs#Context|Name=context_RBPStemLoop1#Element|Name=GuoMCB96Terminator,Type=Terminator,SubType=GuoMCB96Terminator,Strength=Strong,Orientation=plus,Sequence=TATATAACTGTCTAGAAATAAAGAGTATCATCTTTCAAA,Start=30#Barcode|Sequence=TTGTCATGGAT,Start=19,End=29,#Primer5|Sequence=GGGGACCAGGTGCCGTAAG,Start=132,End=150,#Primer3|Sequence=GCGATCCTAGGGCGATCA,Start=1,End=18,	GGGGACCAGGTGCCGTAAGCTAGACTTTGCCAACGCGTTACTTGGTACAAAAACTAGGTAACGCGTTGGCAAAGTCTACTTCTATATAACTGTCTAGAAATAAAGAGTATCATCTTTCAAATTGTCATGGATGCGATCCTAGGGCGATCA
347	347		SetName|SetName=duplicate barcodes hubs#Context|Name=context_RBPStemLoop2#Element|Name=GuoMCB96Terminator,Type=Terminator,SubType=GuoMCB96Terminator,Strength=Strong,Orientation=plus,Sequence=TATATAACTGTCTAGAAATAAAGAGTATCATCTTTCAAA,Start=30#Barcode|Sequence=AGTCACGAGAC,Start=19,End=29,#Primer5|Sequence=GGGGACCAGGTGCCGTAAG,Start=132,End=150,#Primer3|Sequence=GCGATCCTAGGGCGATCA,Start=1,End=18,	GGGGACCAGGTGCCGTAAGTAGTCACTGAGTTCACATGGCTTATGGTTTAAACCGTAAGCCATGTGAACTCAGTGACTTCACTATATAACTGTCTAGAAATAAAGAGTATCATCTTTCAAAAGTCACGAGACGCGATCCTAGGGCGATCA
348	348	0.5192	SetName|SetName=duplicate barcodes hubs#Context|Name=context_RBPStemLoop3#Element|Name=GuoMCB96Terminator,Type=Terminator,SubType=GuoMCB96Terminator,Strength=Strong,Orientation=plus,Sequence=TATATAACTGTCTAGAAATAAAGAGTATCATCTTTCAAA,Start=30#Barcode|Sequence=CCCTGTTCTTA,Start=19,End=29,#Primer5|Sequence=GGGGACCAGGTGCCGTAAG,Start=132,End=150,#Primer3|Sequence=GCGATCCTAGGGCGATCA,Start=1,End=18,	GGGGACCAGGTGCCGTAAGTCCATCACGAGAAGTTCAAGCTGTTTCCTTAGTAAAGAAGCTTGAACTTCTCGTGATGCTTACTATATAACTGTCTAGAAATAAAGAGTATCATCTTTCAAACCCTGTTCTTAGCGATCCTAGGGCGATCA
349	349		SetName|SetName=duplicate barcodes hubs#Context|Name=context_RBPStemLoop1#Element|Name=GuoMCB96Terminator,Type=Terminator,SubType=GuoMCB96Terminator,Strength=Strong,Orientation=plus,Sequence=TATATAACTGTCTAGAAATAAAGAGTATCATCTTTCAAA,Start=30#Barcode|Sequence=AGTTGGACGCC,Start=19,End=29,#Primer5|Sequence=GGGGACCAGGTGCCGTAAG,Start=132,End=150,#Primer3|Sequence=GCGATCCTAGGGCGATCA,Start=1,End=18,	GGGGACCAGGTGCCGTAAGCTAGACTTTGCCAACGCGTTACTTGGTACAAAAACTAGGTAACGCGTTGGCAAAGTCTACTTCTATATAACTGTCTAGAAATAAAGAGTATCATCTTTCAAAAGTTGGACGCCGCGATCCTAGGGCGATCA
350	350		SetName|SetName=duplicate barcodes hubs#Context|Name=context_RBPStemLoop2#Element|Name=GuoMCB96Terminator,Type=Terminator,SubType=GuoMCB96Terminator,Strength=Strong,Orientation=plus,Sequence=TATATAACTGTCTAGAAATAAAGAGTATCATCTTTCAAA,Start=30#Barcode|Sequence=ATAGAAAGTAC,Start=19,End=29,#Primer5|Sequence=GGGGACCAGGTGCCGTAAG,Start=132,End=150,#Primer3|Sequence=GCGATCCTAGGGCGATCA,Start=1,End=18,	GGGGACCAGGTGCCGTAAGTAGTCACTGAGTTCACATGGCTTATGGTTTAAACCGTAAGCCATGTGAACTCAGTGACTTCACTATATAACTGTCTAGAAATAAAGAGTATCATCTTTCAAAATAGAAAGTACGCGATCCTAGGGCGATCA
351	351	1.4645	SetName|SetName=duplicate barcodes hubs#Context|Name=context_RBPStemLoop3#Element|Name=GuoMCB96Terminator,Type=Terminator,SubType=GuoMCB96Terminator,Strength=Strong,Orientation=plus,Sequence=TATATAACTGTCTAGAAATAAAGAGTATCATCTTTCAAA,Start=30#Barcode|Sequence=CAGACCTGCTC,Start=19,End=29,#Primer5|Sequence=GGGGACCAGGTGCCGTAAG,Start=132,End=150,#Primer3|Sequence=GCGATCCTAGGGCGATCA,Start=1,End=18,	GGGGACCAGGTGCCGTAAGTCCATCACGAGAAGTTCAAGCTGTTTCCTTAGTAAAGAAGCTTGAACTTCTCGTGATGCTTACTATATAACTGTCTAGAAATAAAGAGTATCATCTTTCAAACAGACCTGCTCGCGATCCTAGGGCGATCA
352	352	0.3027	SetName|SetName=duplicate barcodes hubs#Context|Name=context_RBPStemLoop1#Element|Name=GuoMCB96Terminator,Type=Terminator,SubType=GuoMCB96Terminator,Strength=Strong,Orientation=plus,Sequence=TATATAACTGTCTAGAAATAAAGAGTATCATCTTTCAAA,Start=30#Barcode|Sequence=TCGCGAGGACA,Start=19,End=29,#Primer5|Sequence=GGGGACCAGGTGCCGTAAG,Start=132,End=150,#Primer3|Sequence=GCGATCCTAGGGCGATCA,Start=1,End=18,	GGGGACCAGGTGCCGTAAGCTAGACTTTGCCAACGCGTTACTTGGTACAAAAACTAGGTAACGCGTTGGCAAAGTCTACTTCTATATAACTGTCTAGAAATAAAGAGTATCATCTTTCAAATCGCGAGGACAGCGATCCTAGGGCGATCA
353	353		SetName|SetName=duplicate barcodes hubs#Context|Name=context_RBPStemLoop2#Element|Name=GuoMCB96Terminator,Type=Terminator,SubType=GuoMCB96Terminator,Strength=Strong,Orientation=plus,Sequence=TATATAACTGTCTAGAAATAAAGAGTATCATCTTTCAAA,Start=30#Barcode|Sequence=ACGACACTGGG,Start=19,End=29,#Primer5|Sequence=GGGGACCAGGTGCCGTAAG,Start=132,End=150,#Primer3|Sequence=GCGATCCTAGGGCGATCA,Start=1,End=18,	GGGGACCAGGTGCCGTAAGTAGTCACTGAGTTCACATGGCTTATGGTTTAAACCGTAAGCCATGTGAACTCAGTGACTTCACTATATAACTGTCTAGAAATAAAGAGTATCATCTTTCAAAACGACACTGGGGCGATCCTAGGGCGATCA
354	354	0.288	SetName|SetName=duplicate barcodes hubs#Context|Name=context_RBPStemLoop3#Element|Name=GuoMCB96Terminator,Type=Terminator,SubType=GuoMCB96Terminator,Strength=Strong,Orientation=plus,Sequence=TATATAACTGTCTAGAAATAAAGAGTATCATCTTTCAAA,Start=30#Barcode|Sequence=GCCACGAGACT,Start=19,End=29,#Primer5|Sequence=GGGGACCAGGTGCCGTAAG,Start=132,End=150,#Primer3|Sequence=GCGATCCTAGGGCGATCA,Start=1,End=18,	GGGGACCAGGTGCCGTAAGTCCATCACGAGAAGTTCAAGCTGTTTCCTTAGTAAAGAAGCTTGAACTTCTCGTGATGCTTACTATATAACTGTCTAGAAATAAAGAGTATCATCTTTCAAAGCCACGAGACTGCGATCCTAGGGCGATCA
355	355	0.5355	SetName|SetName=duplicate barcodes hubs#Context|Name=context_RBPStemLoop1#Element|Name=GuoMCB96Terminator,Type=Terminator,SubType=GuoMCB96Terminator,Strength=Strong,Orientation=plus,Sequence=TATATAACTGTCTAGAAATAAAGAGTATCATCTTTCAAA,Start=30#Barcode|Sequence=GCGCCTTCAGA,Start=19,End=29,#Primer5|Sequence=GGGGACCAGGTGCCGTAAG,Start=132,End=150,#Primer3|Sequence=GCGATCCTAGGGCGATCA,Start=1,End=18,	GGGGACCAGGTGCCGTAAGCTAGACTTTGCCAACGCGTTACTTGGTACAAAAACTAGGTAACGCGTTGGCAAAGTCTACTTCTATATAACTGTCTAGAAATAAAGAGTATCATCTTTCAAAGCGCCTTCAGAGCGATCCTAGGGCGATCA
356	356	1.1827	SetName|SetName=duplicate barcodes hubs#Context|Name=context_RBPStemLoop2#Element|Name=GuoMCB96Terminator,Type=Terminator,SubType=GuoMCB96Terminator,Strength=Strong,Orientation=plus,Sequence=TATATAACTGTCTAGAAATAAAGAGTATCATCTTTCAAA,Start=30#Barcode|Sequence=TAGAACTTTAG,Start=19,End=29,#Primer5|Sequence=GGGGACCAGGTGCCGTAAG,Start=132,End=150,#Primer3|Sequence=GCGATCCTAGGGCGATCA,Start=1,End=18,	GGGGACCAGGTGCCGTAAGTAGTCACTGAGTTCACATGGCTTATGGTTTAAACCGTAAGCCATGTGAACTCAGTGACTTCACTATATAACTGTCTAGAAATAAAGAGTATCATCTTTCAAATAGAACTTTAGGCGATCCTAGGGCGATCA
357	357	0.2858	SetName|SetName=duplicate barcodes hubs#Context|Name=context_RBPStemLoop3#Element|Name=GuoMCB96Terminator,Type=Terminator,SubType=GuoMCB96Terminator,Strength=Strong,Orientation=plus,Sequence=TATATAACTGTCTAGAAATAAAGAGTATCATCTTTCAAA,Start=30#Barcode|Sequence=GTCGGTAGACG,Start=19,End=29,#Primer5|Sequence=GGGGACCAGGTGCCGTAAG,Start=132,End=150,#Primer3|Sequence=GCGATCCTAGGGCGATCA,Start=1,End=18,	GGGGACCAGGTGCCGTAAGTCCATCACGAGAAGTTCAAGCTGTTTCCTTAGTAAAGAAGCTTGAACTTCTCGTGATGCTTACTATATAACTGTCTAGAAATAAAGAGTATCATCTTTCAAAGTCGGTAGACGGCGATCCTAGGGCGATCA
358	358		SetName|SetName=duplicate barcodes hubs#Context|Name=context_RBPStemLoop1#Element|Name=GuoMCB96Terminator,Type=Terminator,SubType=GuoMCB96Terminator,Strength=Strong,Orientation=plus,Sequence=TATATAACTGTCTAGAAATAAAGAGTATCATCTTTCAAA,Start=30#Barcode|Sequence=TTAACGGGAGC,Start=19,End=29,#Primer5|Sequence=GGGGACCAGGTGCCGTAAG,Start=132,End=150,#Primer3|Sequence=GCGATCCTAGGGCGATCA,Start=1,End=18,	GGGGACCAGGTGCCGTAAGCTAGACTTTGCCAACGCGTTACTTGGTACAAAAACTAGGTAACGCGTTGGCAAAGTCTACTTCTATATAACTGTCTAGAAATAAAGAGTATCATCTTTCAAATTAACGGGAGCGCGATCCTAGGGCGATCA
359	359	3.0394	SetName|SetName=duplicate barcodes hubs#Context|Name=context_RBPStemLoop2#Element|Name=GuoMCB96Terminator,Type=Terminator,SubType=GuoMCB96Terminator,Strength=Strong,Orientation=plus,Sequence=TATATAACTGTCTAGAAATAAAGAGTATCATCTTTCAAA,Start=30#Barcode|Sequence=CCCTCCACTGC,Start=19,End=29,#Primer5|Sequence=GGGGACCAGGTGCCGTAAG,Start=132,End=150,#Primer3|Sequence=GCGATCCTAGGGCGATCA,Start=1,End=18,	GGGGACCAGGTGCCGTAAGTAGTCACTGAGTTCACATGGCTTATGGTTTAAACCGTAAGCCATGTGAACTCAGTGACTTCACTATATAACTGTCTAGAAATAAAGAGTATCATCTTTCAAACCCTCCACTGCGCGATCCTAGGGCGATCA
360	360	0.2636	SetName|SetName=duplicate barcodes hubs#Context|Name=context_RBPStemLoop3#Element|Name=GuoMCB96Terminator,Type=Terminator,SubType=GuoMCB96Terminator,Strength=Strong,Orientation=plus,Sequence=TATATAACTGTCTAGAAATAAAGAGTATCATCTTTCAAA,Start=30#Barcode|Sequence=CGTGGCACGTG,Start=19,End=29,#Primer5|Sequence=GGGGACCAGGTGCCGTAAG,Start=132,End=150,#Primer3|Sequence=GCGATCCTAGGGCGATCA,Start=1,End=18,	GGGGACCAGGTGCCGTAAGTCCATCACGAGAAGTTCAAGCTGTTTCCTTAGTAAAGAAGCTTGAACTTCTCGTGATGCTTACTATATAACTGTCTAGAAATAAAGAGTATCATCTTTCAAACGTGGCACGTGGCGATCCTAGGGCGATCA
361	361	0.6937	SetName|SetName=duplicate barcodes hubs#Context|Name=context_RBPStemLoop1#Element|Name=GuoMCB96Terminator,Type=Terminator,SubType=GuoMCB96Terminator,Strength=Strong,Orientation=plus,Sequence=TATATAACTGTCTAGAAATAAAGAGTATCATCTTTCAAA,Start=30#Barcode|Sequence=ACGATACCGAT,Start=19,End=29,#Primer5|Sequence=GGGGACCAGGTGCCGTAAG,Start=132,End=150,#Primer3|Sequence=GCGATCCTAGGGCGATCA,Start=1,End=18,	GGGGACCAGGTGCCGTAAGCTAGACTTTGCCAACGCGTTACTTGGTACAAAAACTAGGTAACGCGTTGGCAAAGTCTACTTCTATATAACTGTCTAGAAATAAAGAGTATCATCTTTCAAAACGATACCGATGCGATCCTAGGGCGATCA
362	362		SetName|SetName=duplicate barcodes hubs#Context|Name=context_RBPStemLoop2#Element|Name=GuoMCB96Terminator,Type=Terminator,SubType=GuoMCB96Terminator,Strength=Strong,Orientation=plus,Sequence=TATATAACTGTCTAGAAATAAAGAGTATCATCTTTCAAA,Start=30#Barcode|Sequence=GCACTTAATGC,Start=19,End=29,#Primer5|Sequence=GGGGACCAGGTGCCGTAAG,Start=132,End=150,#Primer3|Sequence=GCGATCCTAGGGCGATCA,Start=1,End=18,	GGGGACCAGGTGCCGTAAGTAGTCACTGAGTTCACATGGCTTATGGTTTAAACCGTAAGCCATGTGAACTCAGTGACTTCACTATATAACTGTCTAGAAATAAAGAGTATCATCTTTCAAAGCACTTAATGCGCGATCCTAGGGCGATCA
363	363		SetName|SetName=duplicate barcodes hubs#Context|Name=context_RBPStemLoop3#Element|Name=GuoMCB96Terminator,Type=Terminator,SubType=GuoMCB96Terminator,Strength=Strong,Orientation=plus,Sequence=TATATAACTGTCTAGAAATAAAGAGTATCATCTTTCAAA,Start=30#Barcode|Sequence=ATCTTAAGTGC,Start=19,End=29,#Primer5|Sequence=GGGGACCAGGTGCCGTAAG,Start=132,End=150,#Primer3|Sequence=GCGATCCTAGGGCGATCA,Start=1,End=18,	GGGGACCAGGTGCCGTAAGTCCATCACGAGAAGTTCAAGCTGTTTCCTTAGTAAAGAAGCTTGAACTTCTCGTGATGCTTACTATATAACTGTCTAGAAATAAAGAGTATCATCTTTCAAAATCTTAAGTGCGCGATCCTAGGGCGATCA
364	364		SetName|SetName=duplicate barcodes hubs#Context|Name=context_RBPStemLoop1#Element|Name=GuoMCB96Terminator,Type=Terminator,SubType=GuoMCB96Terminator,Strength=Strong,Orientation=plus,Sequence=TATATAACTGTCTAGAAATAAAGAGTATCATCTTTCAAA,Start=30#Barcode|Sequence=TTGCGTGCGAT,Start=19,End=29,#Primer5|Sequence=GGGGACCAGGTGCCGTAAG,Start=132,End=150,#Primer3|Sequence=GCGATCCTAGGGCGATCA,Start=1,End=18,	GGGGACCAGGTGCCGTAAGCTAGACTTTGCCAACGCGTTACTTGGTACAAAAACTAGGTAACGCGTTGGCAAAGTCTACTTCTATATAACTGTCTAGAAATAAAGAGTATCATCTTTCAAATTGCGTGCGATGCGATCCTAGGGCGATCA
365	365	0.2397	SetName|SetName=duplicate barcodes hubs#Context|Name=context_RBPStemLoop2#Element|Name=GuoMCB96Terminator,Type=Terminator,SubType=GuoMCB96Terminator,Strength=Strong,Orientation=plus,Sequence=TATATAACTGTCTAGAAATAAAGAGTATCATCTTTCAAA,Start=30#Barcode|Sequence=ATCTACTAATC,Start=19,End=29,#Primer5|Sequence=GGGGACCAGGTGCCGTAAG,Start=132,End=150,#Primer3|Sequence=GCGATCCTAGGGCGATCA,Start=1,End=18,	GGGGACCAGGTGCCGTAAGTAGTCACTGAGTTCACATGGCTTATGGTTTAAACCGTAAGCCATGTGAACTCAGTGACTTCACTATATAACTGTCTAGAAATAAAGAGTATCATCTTTCAAAATCTACTAATCGCGATCCTAGGGCGATCA
366	366		SetName|SetName=duplicate barcodes hubs#Context|Name=context_RBPStemLoop3#Element|Name=GuoMCB96Terminator,Type=Terminator,SubType=GuoMCB96Terminator,Strength=Strong,Orientation=plus,Sequence=TATATAACTGTCTAGAAATAAAGAGTATCATCTTTCAAA,Start=30#Barcode|Sequence=GCCTCAGCTGA,Start=19,End=29,#Primer5|Sequence=GGGGACCAGGTGCCGTAAG,Start=132,End=150,#Primer3|Sequence=GCGATCCTAGGGCGATCA,Start=1,End=18,	GGGGACCAGGTGCCGTAAGTCCATCACGAGAAGTTCAAGCTGTTTCCTTAGTAAAGAAGCTTGAACTTCTCGTGATGCTTACTATATAACTGTCTAGAAATAAAGAGTATCATCTTTCAAAGCCTCAGCTGAGCGATCCTAGGGCGATCA
367	367		SetName|SetName=duplicate barcodes hubs#Context|Name=context_RBPStemLoop1#Element|Name=GuoMCB96Terminator,Type=Terminator,SubType=GuoMCB96Terminator,Strength=Strong,Orientation=plus,Sequence=TATATAACTGTCTAGAAATAAAGAGTATCATCTTTCAAA,Start=30#Barcode|Sequence=CAGTACAGTAT,Start=19,End=29,#Primer5|Sequence=GGGGACCAGGTGCCGTAAG,Start=132,End=150,#Primer3|Sequence=GCGATCCTAGGGCGATCA,Start=1,End=18,	GGGGACCAGGTGCCGTAAGCTAGACTTTGCCAACGCGTTACTTGGTACAAAAACTAGGTAACGCGTTGGCAAAGTCTACTTCTATATAACTGTCTAGAAATAAAGAGTATCATCTTTCAAACAGTACAGTATGCGATCCTAGGGCGATCA
368	368		SetName|SetName=duplicate barcodes hubs#Context|Name=context_RBPStemLoop2#Element|Name=GuoMCB96Terminator,Type=Terminator,SubType=GuoMCB96Terminator,Strength=Strong,Orientation=plus,Sequence=TATATAACTGTCTAGAAATAAAGAGTATCATCTTTCAAA,Start=30#Barcode|Sequence=GTGCGGTACGT,Start=19,End=29,#Primer5|Sequence=GGGGACCAGGTGCCGTAAG,Start=132,End=150,#Primer3|Sequence=GCGATCCTAGGGCGATCA,Start=1,End=18,	GGGGACCAGGTGCCGTAAGTAGTCACTGAGTTCACATGGCTTATGGTTTAAACCGTAAGCCATGTGAACTCAGTGACTTCACTATATAACTGTCTAGAAATAAAGAGTATCATCTTTCAAAGTGCGGTACGTGCGATCCTAGGGCGATCA
369	369		SetName|SetName=duplicate barcodes hubs#Context|Name=context_RBPStemLoop3#Element|Name=GuoMCB96Terminator,Type=Terminator,SubType=GuoMCB96Terminator,Strength=Strong,Orientation=plus,Sequence=TATATAACTGTCTAGAAATAAAGAGTATCATCTTTCAAA,Start=30#Barcode|Sequence=ACGATTAGTGC,Start=19,End=29,#Primer5|Sequence=GGGGACCAGGTGCCGTAAG,Start=132,End=150,#Primer3|Sequence=GCGATCCTAGGGCGATCA,Start=1,End=18,	GGGGACCAGGTGCCGTAAGTCCATCACGAGAAGTTCAAGCTGTTTCCTTAGTAAAGAAGCTTGAACTTCTCGTGATGCTTACTATATAACTGTCTAGAAATAAAGAGTATCATCTTTCAAAACGATTAGTGCGCGATCCTAGGGCGATCA
370	370	0.4098	SetName|SetName=duplicate barcodes hubs#Context|Name=context_RBPStemLoop1#Element|Name=GuoMCB96Terminator,Type=Terminator,SubType=GuoMCB96Terminator,Strength=Strong,Orientation=plus,Sequence=TATATAACTGTCTAGAAATAAAGAGTATCATCTTTCAAA,Start=30#Barcode|Sequence=ATCGAACACAG,Start=19,End=29,#Primer5|Sequence=GGGGACCAGGTGCCGTAAG,Start=132,End=150,#Primer3|Sequence=GCGATCCTAGGGCGATCA,Start=1,End=18,	GGGGACCAGGTGCCGTAAGCTAGACTTTGCCAACGCGTTACTTGGTACAAAAACTAGGTAACGCGTTGGCAAAGTCTACTTCTATATAACTGTCTAGAAATAAAGAGTATCATCTTTCAAAATCGAACACAGGCGATCCTAGGGCGATCA
371	371	0.3252	SetName|SetName=duplicate barcodes hubs#Context|Name=context_RBPStemLoop2#Element|Name=GuoMCB96Terminator,Type=Terminator,SubType=GuoMCB96Terminator,Strength=Strong,Orientation=plus,Sequence=TATATAACTGTCTAGAAATAAAGAGTATCATCTTTCAAA,Start=30#Barcode|Sequence=TGTAAGTGATC,Start=19,End=29,#Primer5|Sequence=GGGGACCAGGTGCCGTAAG,Start=132,End=150,#Primer3|Sequence=GCGATCCTAGGGCGATCA,Start=1,End=18,	GGGGACCAGGTGCCGTAAGTAGTCACTGAGTTCACATGGCTTATGGTTTAAACCGTAAGCCATGTGAACTCAGTGACTTCACTATATAACTGTCTAGAAATAAAGAGTATCATCTTTCAAATGTAAGTGATCGCGATCCTAGGGCGATCA
372	372	0.6281	SetName|SetName=duplicate barcodes hubs#Context|Name=context_RBPStemLoop3#Element|Name=GuoMCB96Terminator,Type=Terminator,SubType=GuoMCB96Terminator,Strength=Strong,Orientation=plus,Sequence=TATATAACTGTCTAGAAATAAAGAGTATCATCTTTCAAA,Start=30#Barcode|Sequence=TCTATCGTTAG,Start=19,End=29,#Primer5|Sequence=GGGGACCAGGTGCCGTAAG,Start=132,End=150,#Primer3|Sequence=GCGATCCTAGGGCGATCA,Start=1,End=18,	GGGGACCAGGTGCCGTAAGTCCATCACGAGAAGTTCAAGCTGTTTCCTTAGTAAAGAAGCTTGAACTTCTCGTGATGCTTACTATATAACTGTCTAGAAATAAAGAGTATCATCTTTCAAATCTATCGTTAGGCGATCCTAGGGCGATCA
373	373	0.488	SetName|SetName=duplicate barcodes hubs#Context|Name=context_RBPStemLoop1#Element|Name=GuoMCB96Terminator,Type=Terminator,SubType=GuoMCB96Terminator,Strength=Strong,Orientation=plus,Sequence=TATATAACTGTCTAGAAATAAAGAGTATCATCTTTCAAA,Start=30#Barcode|Sequence=TCTATGTGACA,Start=19,End=29,#Primer5|Sequence=GGGGACCAGGTGCCGTAAG,Start=132,End=150,#Primer3|Sequence=GCGATCCTAGGGCGATCA,Start=1,End=18,	GGGGACCAGGTGCCGTAAGCTAGACTTTGCCAACGCGTTACTTGGTACAAAAACTAGGTAACGCGTTGGCAAAGTCTACTTCTATATAACTGTCTAGAAATAAAGAGTATCATCTTTCAAATCTATGTGACAGCGATCCTAGGGCGATCA
374	374	3.2011	SetName|SetName=duplicate barcodes hubs#Context|Name=context_RBPStemLoop2#Element|Name=GuoMCB96Terminator,Type=Terminator,SubType=GuoMCB96Terminator,Strength=Strong,Orientation=plus,Sequence=TATATAACTGTCTAGAAATAAAGAGTATCATCTTTCAAA,Start=30#Barcode|Sequence=GAAGGCTGCGC,Start=19,End=29,#Primer5|Sequence=GGGGACCAGGTGCCGTAAG,Start=132,End=150,#Primer3|Sequence=GCGATCCTAGGGCGATCA,Start=1,End=18,	GGGGACCAGGTGCCGTAAGTAGTCACTGAGTTCACATGGCTTATGGTTTAAACCGTAAGCCATGTGAACTCAGTGACTTCACTATATAACTGTCTAGAAATAAAGAGTATCATCTTTCAAAGAAGGCTGCGCGCGATCCTAGGGCGATCA
375	375		SetName|SetName=duplicate barcodes hubs#Context|Name=context_RBPStemLoop3#Element|Name=GuoMCB96Terminator,Type=Terminator,SubType=GuoMCB96Terminator,Strength=Strong,Orientation=plus,Sequence=TATATAACTGTCTAGAAATAAAGAGTATCATCTTTCAAA,Start=30#Barcode|Sequence=AAGGCTGACAA,Start=19,End=29,#Primer5|Sequence=GGGGACCAGGTGCCGTAAG,Start=132,End=150,#Primer3|Sequence=GCGATCCTAGGGCGATCA,Start=1,End=18,	GGGGACCAGGTGCCGTAAGTCCATCACGAGAAGTTCAAGCTGTTTCCTTAGTAAAGAAGCTTGAACTTCTCGTGATGCTTACTATATAACTGTCTAGAAATAAAGAGTATCATCTTTCAAAAAGGCTGACAAGCGATCCTAGGGCGATCA
376	376		SetName|SetName=duplicate barcodes hubs#Context|Name=context_RBPStemLoop1#Element|Name=GuoMCB96Terminator,Type=Terminator,SubType=GuoMCB96Terminator,Strength=Strong,Orientation=plus,Sequence=TATATAACTGTCTAGAAATAAAGAGTATCATCTTTCAAA,Start=30#Barcode|Sequence=ACGTGTCGTCG,Start=19,End=29,#Primer5|Sequence=GGGGACCAGGTGCCGTAAG,Start=132,End=150,#Primer3|Sequence=GCGATCCTAGGGCGATCA,Start=1,End=18,	GGGGACCAGGTGCCGTAAGCTAGACTTTGCCAACGCGTTACTTGGTACAAAAACTAGGTAACGCGTTGGCAAAGTCTACTTCTATATAACTGTCTAGAAATAAAGAGTATCATCTTTCAAAACGTGTCGTCGGCGATCCTAGGGCGATCA
377	377		SetName|SetName=duplicate barcodes hubs#Context|Name=context_RBPStemLoop2#Element|Name=GuoMCB96Terminator,Type=Terminator,SubType=GuoMCB96Terminator,Strength=Strong,Orientation=plus,Sequence=TATATAACTGTCTAGAAATAAAGAGTATCATCTTTCAAA,Start=30#Barcode|Sequence=CTGCTGAGCCG,Start=19,End=29,#Primer5|Sequence=GGGGACCAGGTGCCGTAAG,Start=132,End=150,#Primer3|Sequence=GCGATCCTAGGGCGATCA,Start=1,End=18,	GGGGACCAGGTGCCGTAAGTAGTCACTGAGTTCACATGGCTTATGGTTTAAACCGTAAGCCATGTGAACTCAGTGACTTCACTATATAACTGTCTAGAAATAAAGAGTATCATCTTTCAAACTGCTGAGCCGGCGATCCTAGGGCGATCA
378	378	0.5227	SetName|SetName=duplicate barcodes hubs#Context|Name=context_RBPStemLoop3#Element|Name=GuoMCB96Terminator,Type=Terminator,SubType=GuoMCB96Terminator,Strength=Strong,Orientation=plus,Sequence=TATATAACTGTCTAGAAATAAAGAGTATCATCTTTCAAA,Start=30#Barcode|Sequence=TGTAACAAGTA,Start=19,End=29,#Primer5|Sequence=GGGGACCAGGTGCCGTAAG,Start=132,End=150,#Primer3|Sequence=GCGATCCTAGGGCGATCA,Start=1,End=18,	GGGGACCAGGTGCCGTAAGTCCATCACGAGAAGTTCAAGCTGTTTCCTTAGTAAAGAAGCTTGAACTTCTCGTGATGCTTACTATATAACTGTCTAGAAATAAAGAGTATCATCTTTCAAATGTAACAAGTAGCGATCCTAGGGCGATCA
379	379		SetName|SetName=duplicate barcodes hubs#Context|Name=context_RBPStemLoop1#Element|Name=GuoMCB96Terminator,Type=Terminator,SubType=GuoMCB96Terminator,Strength=Strong,Orientation=plus,Sequence=TATATAACTGTCTAGAAATAAAGAGTATCATCTTTCAAA,Start=30#Barcode|Sequence=CCAGATTAATG,Start=19,End=29,#Primer5|Sequence=GGGGACCAGGTGCCGTAAG,Start=132,End=150,#Primer3|Sequence=GCGATCCTAGGGCGATCA,Start=1,End=18,	GGGGACCAGGTGCCGTAAGCTAGACTTTGCCAACGCGTTACTTGGTACAAAAACTAGGTAACGCGTTGGCAAAGTCTACTTCTATATAACTGTCTAGAAATAAAGAGTATCATCTTTCAAACCAGATTAATGGCGATCCTAGGGCGATCA
380	380		SetName|SetName=duplicate barcodes hubs#Context|Name=context_RBPStemLoop2#Element|Name=GuoMCB96Terminator,Type=Terminator,SubType=GuoMCB96Terminator,Strength=Strong,Orientation=plus,Sequence=TATATAACTGTCTAGAAATAAAGAGTATCATCTTTCAAA,Start=30#Barcode|Sequence=CTTGCGCGAGC,Start=19,End=29,#Primer5|Sequence=GGGGACCAGGTGCCGTAAG,Start=132,End=150,#Primer3|Sequence=GCGATCCTAGGGCGATCA,Start=1,End=18,	GGGGACCAGGTGCCGTAAGTAGTCACTGAGTTCACATGGCTTATGGTTTAAACCGTAAGCCATGTGAACTCAGTGACTTCACTATATAACTGTCTAGAAATAAAGAGTATCATCTTTCAAACTTGCGCGAGCGCGATCCTAGGGCGATCA
381	381	0.9268	SetName|SetName=duplicate barcodes hubs#Context|Name=context_RBPStemLoop3#Element|Name=GuoMCB96Terminator,Type=Terminator,SubType=GuoMCB96Terminator,Strength=Strong,Orientation=plus,Sequence=TATATAACTGTCTAGAAATAAAGAGTATCATCTTTCAAA,Start=30#Barcode|Sequence=GTGCACCATGA,Start=19,End=29,#Primer5|Sequence=GGGGACCAGGTGCCGTAAG,Start=132,End=150,#Primer3|Sequence=GCGATCCTAGGGCGATCA,Start=1,End=18,	GGGGACCAGGTGCCGTAAGTCCATCACGAGAAGTTCAAGCTGTTTCCTTAGTAAAGAAGCTTGAACTTCTCGTGATGCTTACTATATAACTGTCTAGAAATAAAGAGTATCATCTTTCAAAGTGCACCATGAGCGATCCTAGGGCGATCA
382	382		SetName|SetName=duplicate barcodes hubs#Context|Name=context_RBPStemLoop1#Element|Name=GuoMCB96Terminator,Type=Terminator,SubType=GuoMCB96Terminator,Strength=Strong,Orientation=plus,Sequence=TATATAACTGTCTAGAAATAAAGAGTATCATCTTTCAAA,Start=30#Barcode|Sequence=CGTTCTTGTCT,Start=19,End=29,#Primer5|Sequence=GGGGACCAGGTGCCGTAAG,Start=132,End=150,#Primer3|Sequence=GCGATCCTAGGGCGATCA,Start=1,End=18,	GGGGACCAGGTGCCGTAAGCTAGACTTTGCCAACGCGTTACTTGGTACAAAAACTAGGTAACGCGTTGGCAAAGTCTACTTCTATATAACTGTCTAGAAATAAAGAGTATCATCTTTCAAACGTTCTTGTCTGCGATCCTAGGGCGATCA
383	383	0.4283	SetName|SetName=duplicate barcodes hubs#Context|Name=context_RBPStemLoop2#Element|Name=GuoMCB96Terminator,Type=Terminator,SubType=GuoMCB96Terminator,Strength=Strong,Orientation=plus,Sequence=TATATAACTGTCTAGAAATAAAGAGTATCATCTTTCAAA,Start=30#Barcode|Sequence=CGTTCGTAACG,Start=19,End=29,#Primer5|Sequence=GGGGACCAGGTGCCGTAAG,Start=132,End=150,#Primer3|Sequence=GCGATCCTAGGGCGATCA,Start=1,End=18,	GGGGACCAGGTGCCGTAAGTAGTCACTGAGTTCACATGGCTTATGGTTTAAACCGTAAGCCATGTGAACTCAGTGACTTCACTATATAACTGTCTAGAAATAAAGAGTATCATCTTTCAAACGTTCGTAACGGCGATCCTAGGGCGATCA
384	384	0.3199	SetName|SetName=duplicate barcodes hubs#Context|Name=context_RBPStemLoop3#Element|Name=GuoMCB96Terminator,Type=Terminator,SubType=GuoMCB96Terminator,Strength=Strong,Orientation=plus,Sequence=TATATAACTGTCTAGAAATAAAGAGTATCATCTTTCAAA,Start=30#Barcode|Sequence=TAGAACTGAGC,Start=19,End=29,#Primer5|Sequence=GGGGACCAGGTGCCGTAAG,Start=132,End=150,#Primer3|Sequence=GCGATCCTAGGGCGATCA,Start=1,End=18,	GGGGACCAGGTGCCGTAAGTCCATCACGAGAAGTTCAAGCTGTTTCCTTAGTAAAGAAGCTTGAACTTCTCGTGATGCTTACTATATAACTGTCTAGAAATAAAGAGTATCATCTTTCAAATAGAACTGAGCGCGATCCTAGGGCGATCA
385	385		SetName|SetName=duplicate barcodes hubs#Context|Name=context_RBPStemLoop1#Element|Name=GuoMCB96Terminator,Type=Terminator,SubType=GuoMCB96Terminator,Strength=Strong,Orientation=plus,Sequence=TATATAACTGTCTAGAAATAAAGAGTATCATCTTTCAAA,Start=30#Barcode|Sequence=TGGCACAACTT,Start=19,End=29,#Primer5|Sequence=GGGGACCAGGTGCCGTAAG,Start=132,End=150,#Primer3|Sequence=GCGATCCTAGGGCGATCA,Start=1,End=18,	GGGGACCAGGTGCCGTAAGCTAGACTTTGCCAACGCGTTACTTGGTACAAAAACTAGGTAACGCGTTGGCAAAGTCTACTTCTATATAACTGTCTAGAAATAAAGAGTATCATCTTTCAAATGGCACAACTTGCGATCCTAGGGCGATCA
386	386		SetName|SetName=duplicate barcodes hubs#Context|Name=context_RBPStemLoop2#Element|Name=GuoMCB96Terminator,Type=Terminator,SubType=GuoMCB96Terminator,Strength=Strong,Orientation=plus,Sequence=TATATAACTGTCTAGAAATAAAGAGTATCATCTTTCAAA,Start=30#Barcode|Sequence=AAAGAGCGGCA,Start=19,End=29,#Primer5|Sequence=GGGGACCAGGTGCCGTAAG,Start=132,End=150,#Primer3|Sequence=GCGATCCTAGGGCGATCA,Start=1,End=18,	GGGGACCAGGTGCCGTAAGTAGTCACTGAGTTCACATGGCTTATGGTTTAAACCGTAAGCCATGTGAACTCAGTGACTTCACTATATAACTGTCTAGAAATAAAGAGTATCATCTTTCAAAAAAGAGCGGCAGCGATCCTAGGGCGATCA
387	387	0.2948	SetName|SetName=duplicate barcodes hubs#Context|Name=context_RBPStemLoop3#Element|Name=GuoMCB96Terminator,Type=Terminator,SubType=GuoMCB96Terminator,Strength=Strong,Orientation=plus,Sequence=TATATAACTGTCTAGAAATAAAGAGTATCATCTTTCAAA,Start=30#Barcode|Sequence=GTTTAGCAGAA,Start=19,End=29,#Primer5|Sequence=GGGGACCAGGTGCCGTAAG,Start=132,End=150,#Primer3|Sequence=GCGATCCTAGGGCGATCA,Start=1,End=18,	GGGGACCAGGTGCCGTAAGTCCATCACGAGAAGTTCAAGCTGTTTCCTTAGTAAAGAAGCTTGAACTTCTCGTGATGCTTACTATATAACTGTCTAGAAATAAAGAGTATCATCTTTCAAAGTTTAGCAGAAGCGATCCTAGGGCGATCA
388	388	1.7489	SetName|SetName=duplicate barcodes hubs#Context|Name=context_RBPStemLoop1#Element|Name=GuoMCB96Terminator,Type=Terminator,SubType=GuoMCB96Terminator,Strength=Strong,Orientation=plus,Sequence=TATATAACTGTCTAGAAATAAAGAGTATCATCTTTCAAA,Start=30#Barcode|Sequence=GGCACCACCGT,Start=19,End=29,#Primer5|Sequence=GGGGACCAGGTGCCGTAAG,Start=132,End=150,#Primer3|Sequence=GCGATCCTAGGGCGATCA,Start=1,End=18,	GGGGACCAGGTGCCGTAAGCTAGACTTTGCCAACGCGTTACTTGGTACAAAAACTAGGTAACGCGTTGGCAAAGTCTACTTCTATATAACTGTCTAGAAATAAAGAGTATCATCTTTCAAAGGCACCACCGTGCGATCCTAGGGCGATCA
389	389	0.4857	SetName|SetName=duplicate barcodes hubs#Context|Name=context_RBPStemLoop2#Element|Name=GuoMCB96Terminator,Type=Terminator,SubType=GuoMCB96Terminator,Strength=Strong,Orientation=plus,Sequence=TATATAACTGTCTAGAAATAAAGAGTATCATCTTTCAAA,Start=30#Barcode|Sequence=TCGCACAACGC,Start=19,End=29,#Primer5|Sequence=GGGGACCAGGTGCCGTAAG,Start=132,End=150,#Primer3|Sequence=GCGATCCTAGGGCGATCA,Start=1,End=18,	GGGGACCAGGTGCCGTAAGTAGTCACTGAGTTCACATGGCTTATGGTTTAAACCGTAAGCCATGTGAACTCAGTGACTTCACTATATAACTGTCTAGAAATAAAGAGTATCATCTTTCAAATCGCACAACGCGCGATCCTAGGGCGATCA
390	390	0.333	SetName|SetName=duplicate barcodes hubs#Context|Name=context_RBPStemLoop3#Element|Name=GuoMCB96Terminator,Type=Terminator,SubType=GuoMCB96Terminator,Strength=Strong,Orientation=plus,Sequence=TATATAACTGTCTAGAAATAAAGAGTATCATCTTTCAAA,Start=30#Barcode|Sequence=ACCGTTGTACT,Start=19,End=29,#Primer5|Sequence=GGGGACCAGGTGCCGTAAG,Start=132,End=150,#Primer3|Sequence=GCGATCCTAGGGCGATCA,Start=1,End=18,	GGGGACCAGGTGCCGTAAGTCCATCACGAGAAGTTCAAGCTGTTTCCTTAGTAAAGAAGCTTGAACTTCTCGTGATGCTTACTATATAACTGTCTAGAAATAAAGAGTATCATCTTTCAAAACCGTTGTACTGCGATCCTAGGGCGATCA
391	391		SetName|SetName=duplicate barcodes hubs#Context|Name=context_RBPStemLoop1#Element|Name=GuoMCB96Terminator,Type=Terminator,SubType=GuoMCB96Terminator,Strength=Strong,Orientation=plus,Sequence=TATATAACTGTCTAGAAATAAAGAGTATCATCTTTCAAA,Start=30#Barcode|Sequence=AAGAGCTGAAG,Start=19,End=29,#Primer5|Sequence=GGGGACCAGGTGCCGTAAG,Start=132,End=150,#Primer3|Sequence=GCGATCCTAGGGCGATCA,Start=1,End=18,	GGGGACCAGGTGCCGTAAGCTAGACTTTGCCAACGCGTTACTTGGTACAAAAACTAGGTAACGCGTTGGCAAAGTCTACTTCTATATAACTGTCTAGAAATAAAGAGTATCATCTTTCAAAAAGAGCTGAAGGCGATCCTAGGGCGATCA
392	392		SetName|SetName=duplicate barcodes hubs#Context|Name=context_RBPStemLoop2#Element|Name=GuoMCB96Terminator,Type=Terminator,SubType=GuoMCB96Terminator,Strength=Strong,Orientation=plus,Sequence=TATATAACTGTCTAGAAATAAAGAGTATCATCTTTCAAA,Start=30#Barcode|Sequence=GCGTATTTGGA,Start=19,End=29,#Primer5|Sequence=GGGGACCAGGTGCCGTAAG,Start=132,End=150,#Primer3|Sequence=GCGATCCTAGGGCGATCA,Start=1,End=18,	GGGGACCAGGTGCCGTAAGTAGTCACTGAGTTCACATGGCTTATGGTTTAAACCGTAAGCCATGTGAACTCAGTGACTTCACTATATAACTGTCTAGAAATAAAGAGTATCATCTTTCAAAGCGTATTTGGAGCGATCCTAGGGCGATCA
393	393		SetName|SetName=duplicate barcodes hubs#Context|Name=context_RBPStemLoop3#Element|Name=GuoMCB96Terminator,Type=Terminator,SubType=GuoMCB96Terminator,Strength=Strong,Orientation=plus,Sequence=TATATAACTGTCTAGAAATAAAGAGTATCATCTTTCAAA,Start=30#Barcode|Sequence=GTCGTAGGCTC,Start=19,End=29,#Primer5|Sequence=GGGGACCAGGTGCCGTAAG,Start=132,End=150,#Primer3|Sequence=GCGATCCTAGGGCGATCA,Start=1,End=18,	GGGGACCAGGTGCCGTAAGTCCATCACGAGAAGTTCAAGCTGTTTCCTTAGTAAAGAAGCTTGAACTTCTCGTGATGCTTACTATATAACTGTCTAGAAATAAAGAGTATCATCTTTCAAAGTCGTAGGCTCGCGATCCTAGGGCGATCA
394	394	4.6346	SetName|SetName=duplicate barcodes hubs#Context|Name=context_RBPStemLoop1#Element|Name=GuoMCB96Terminator,Type=Terminator,SubType=GuoMCB96Terminator,Strength=Strong,Orientation=plus,Sequence=TATATAACTGTCTAGAAATAAAGAGTATCATCTTTCAAA,Start=30#Barcode|Sequence=CAAACGCTCTT,Start=19,End=29,#Primer5|Sequence=GGGGACCAGGTGCCGTAAG,Start=132,End=150,#Primer3|Sequence=GCGATCCTAGGGCGATCA,Start=1,End=18,	GGGGACCAGGTGCCGTAAGCTAGACTTTGCCAACGCGTTACTTGGTACAAAAACTAGGTAACGCGTTGGCAAAGTCTACTTCTATATAACTGTCTAGAAATAAAGAGTATCATCTTTCAAACAAACGCTCTTGCGATCCTAGGGCGATCA
395	395		SetName|SetName=duplicate barcodes hubs#Context|Name=context_RBPStemLoop2#Element|Name=GuoMCB96Terminator,Type=Terminator,SubType=GuoMCB96Terminator,Strength=Strong,Orientation=plus,Sequence=TATATAACTGTCTAGAAATAAAGAGTATCATCTTTCAAA,Start=30#Barcode|Sequence=TTGTTACCGAC,Start=19,End=29,#Primer5|Sequence=GGGGACCAGGTGCCGTAAG,Start=132,End=150,#Primer3|Sequence=GCGATCCTAGGGCGATCA,Start=1,End=18,	GGGGACCAGGTGCCGTAAGTAGTCACTGAGTTCACATGGCTTATGGTTTAAACCGTAAGCCATGTGAACTCAGTGACTTCACTATATAACTGTCTAGAAATAAAGAGTATCATCTTTCAAATTGTTACCGACGCGATCCTAGGGCGATCA
396	396		SetName|SetName=duplicate barcodes hubs#Context|Name=context_RBPStemLoop3#Element|Name=GuoMCB96Terminator,Type=Terminator,SubType=GuoMCB96Terminator,Strength=Strong,Orientation=plus,Sequence=TATATAACTGTCTAGAAATAAAGAGTATCATCTTTCAAA,Start=30#Barcode|Sequence=GATCTCTAGTC,Start=19,End=29,#Primer5|Sequence=GGGGACCAGGTGCCGTAAG,Start=132,End=150,#Primer3|Sequence=GCGATCCTAGGGCGATCA,Start=1,End=18,	GGGGACCAGGTGCCGTAAGTCCATCACGAGAAGTTCAAGCTGTTTCCTTAGTAAAGAAGCTTGAACTTCTCGTGATGCTTACTATATAACTGTCTAGAAATAAAGAGTATCATCTTTCAAAGATCTCTAGTCGCGATCCTAGGGCGATCA
397	397		SetName|SetName=duplicate barcodes hubs#Context|Name=context_RBPStemLoop1#Element|Name=GuoMCB96Terminator,Type=Terminator,SubType=GuoMCB96Terminator,Strength=Strong,Orientation=plus,Sequence=TATATAACTGTCTAGAAATAAAGAGTATCATCTTTCAAA,Start=30#Barcode|Sequence=GTGGAGGCTAT,Start=19,End=29,#Primer5|Sequence=GGGGACCAGGTGCCGTAAG,Start=132,End=150,#Primer3|Sequence=GCGATCCTAGGGCGATCA,Start=1,End=18,	GGGGACCAGGTGCCGTAAGCTAGACTTTGCCAACGCGTTACTTGGTACAAAAACTAGGTAACGCGTTGGCAAAGTCTACTTCTATATAACTGTCTAGAAATAAAGAGTATCATCTTTCAAAGTGGAGGCTATGCGATCCTAGGGCGATCA
398	398		SetName|SetName=duplicate barcodes hubs#Context|Name=context_RBPStemLoop2#Element|Name=GuoMCB96Terminator,Type=Terminator,SubType=GuoMCB96Terminator,Strength=Strong,Orientation=plus,Sequence=TATATAACTGTCTAGAAATAAAGAGTATCATCTTTCAAA,Start=30#Barcode|Sequence=TATCGTGACGA,Start=19,End=29,#Primer5|Sequence=GGGGACCAGGTGCCGTAAG,Start=132,End=150,#Primer3|Sequence=GCGATCCTAGGGCGATCA,Start=1,End=18,	GGGGACCAGGTGCCGTAAGTAGTCACTGAGTTCACATGGCTTATGGTTTAAACCGTAAGCCATGTGAACTCAGTGACTTCACTATATAACTGTCTAGAAATAAAGAGTATCATCTTTCAAATATCGTGACGAGCGATCCTAGGGCGATCA
399	399	0.2655	SetName|SetName=duplicate barcodes hubs#Context|Name=context_RBPStemLoop3#Element|Name=GuoMCB96Terminator,Type=Terminator,SubType=GuoMCB96Terminator,Strength=Strong,Orientation=plus,Sequence=TATATAACTGTCTAGAAATAAAGAGTATCATCTTTCAAA,Start=30#Barcode|Sequence=GCCGCATGACC,Start=19,End=29,#Primer5|Sequence=GGGGACCAGGTGCCGTAAG,Start=132,End=150,#Primer3|Sequence=GCGATCCTAGGGCGATCA,Start=1,End=18,	GGGGACCAGGTGCCGTAAGTCCATCACGAGAAGTTCAAGCTGTTTCCTTAGTAAAGAAGCTTGAACTTCTCGTGATGCTTACTATATAACTGTCTAGAAATAAAGAGTATCATCTTTCAAAGCCGCATGACCGCGATCCTAGGGCGATCA
400	400	0.4625	SetName|SetName=duplicate barcodes hubs#Context|Name=context_OpenRandSeqs1#Barcode|Sequence=CCTCAAGCTTC,Start=19,End=29,#Primer5|Sequence=GGGGACCAGGTGCCGTAAG,Start=132,End=150,#Primer3|Sequence=GCGATCCTAGGGCGATCA,Start=1,End=18,	GGGGACCAGGTGCCGTAAGTCCCATGTGGGCTTTATCACGCATTAATTAAATTTCTAAAATGGTTGGATGTCTCGGATCTGCTATATAACTGTCTAGAAATAAAGAGTATCATCTTTCAAACCTCAAGCTTCGCGATCCTAGGGCGATCA
401	401	3.638	SetName|SetName=duplicate barcodes hubs#Context|Name=context_CloseRandSeqs1#Barcode|Sequence=CACGACTAGTA,Start=19,End=29,#Primer5|Sequence=GGGGACCAGGTGCCGTAAG,Start=132,End=150,#Primer3|Sequence=GCGATCCTAGGGCGATCA,Start=1,End=18,	GGGGACCAGGTGCCGTAAGAATTACTAAAAATCAGACATTATATAGGAGTCTAATAAGTCAGACGACTTATGGTGTAGAATCTATATAACTGTCTAGAAATAAAGAGTATCATCTTTCAAACACGACTAGTAGCGATCCTAGGGCGATCA
402	402		SetName|SetName=duplicate barcodes hubs#Context|Name=context_OpenRandSeqs1#Barcode|Sequence=TGAGACTTGGG,Start=19,End=29,#Primer5|Sequence=GGGGACCAGGTGCCGTAAG,Start=132,End=150,#Primer3|Sequence=GCGATCCTAGGGCGATCA,Start=1,End=18,	GGGGACCAGGTGCCGTAAGTCCCATGTGGGCTTTATCACGCATTAATTAAATTTCTAAAATGGTTGGATGTCTCGGATCTGCTATATAACTGTCTAGAAATAAAGAGTATCATCTTTCAAATGAGACTTGGGGCGATCCTAGGGCGATCA
403	403		SetName|SetName=duplicate barcodes hubs#Context|Name=context_CloseRandSeqs1#Barcode|Sequence=TCCCGAGGATC,Start=19,End=29,#Primer5|Sequence=GGGGACCAGGTGCCGTAAG,Start=132,End=150,#Primer3|Sequence=GCGATCCTAGGGCGATCA,Start=1,End=18,	GGGGACCAGGTGCCGTAAGAATTACTAAAAATCAGACATTATATAGGAGTCTAATAAGTCAGACGACTTATGGTGTAGAATCTATATAACTGTCTAGAAATAAAGAGTATCATCTTTCAAATCCCGAGGATCGCGATCCTAGGGCGATCA
404	404	0.3636	SetName|SetName=duplicate barcodes hubs#Context|Name=context_OpenRandSeqs1#Barcode|Sequence=CAGTTGTATTT,Start=19,End=29,#Primer5|Sequence=GGGGACCAGGTGCCGTAAG,Start=132,End=150,#Primer3|Sequence=GCGATCCTAGGGCGATCA,Start=1,End=18,	GGGGACCAGGTGCCGTAAGTCCCATGTGGGCTTTATCACGCATTAATTAAATTTCTAAAATGGTTGGATGTCTCGGATCTGCTATATAACTGTCTAGAAATAAAGAGTATCATCTTTCAAACAGTTGTATTTGCGATCCTAGGGCGATCA
405	405	1.9842	SetName|SetName=duplicate barcodes hubs#Context|Name=context_CloseRandSeqs1#Barcode|Sequence=GCTAGAGTATG,Start=19,End=29,#Primer5|Sequence=GGGGACCAGGTGCCGTAAG,Start=132,End=150,#Primer3|Sequence=GCGATCCTAGGGCGATCA,Start=1,End=18,	GGGGACCAGGTGCCGTAAGAATTACTAAAAATCAGACATTATATAGGAGTCTAATAAGTCAGACGACTTATGGTGTAGAATCTATATAACTGTCTAGAAATAAAGAGTATCATCTTTCAAAGCTAGAGTATGGCGATCCTAGGGCGATCA
406	406	0.387	SetName|SetName=duplicate barcodes hubs#Context|Name=context_OpenRandSeqs1#Barcode|Sequence=TTGGGCGCAAC,Start=19,End=29,#Primer5|Sequence=GGGGACCAGGTGCCGTAAG,Start=132,End=150,#Primer3|Sequence=GCGATCCTAGGGCGATCA,Start=1,End=18,	GGGGACCAGGTGCCGTAAGTCCCATGTGGGCTTTATCACGCATTAATTAAATTTCTAAAATGGTTGGATGTCTCGGATCTGCTATATAACTGTCTAGAAATAAAGAGTATCATCTTTCAAATTGGGCGCAACGCGATCCTAGGGCGATCA
407	407	3.7675	SetName|SetName=duplicate barcodes hubs#Context|Name=context_CloseRandSeqs1#Barcode|Sequence=TGGCGACGTAC,Start=19,End=29,#Primer5|Sequence=GGGGACCAGGTGCCGTAAG,Start=132,End=150,#Primer3|Sequence=GCGATCCTAGGGCGATCA,Start=1,End=18,	GGGGACCAGGTGCCGTAAGAATTACTAAAAATCAGACATTATATAGGAGTCTAATAAGTCAGACGACTTATGGTGTAGAATCTATATAACTGTCTAGAAATAAAGAGTATCATCTTTCAAATGGCGACGTACGCGATCCTAGGGCGATCA
408	408	0.3467	SetName|SetName=duplicate barcodes hubs#Context|Name=context_OpenRandSeqs1#Barcode|Sequence=CGTCGGGATTC,Start=19,End=29,#Primer5|Sequence=GGGGACCAGGTGCCGTAAG,Start=132,End=150,#Primer3|Sequence=GCGATCCTAGGGCGATCA,Start=1,End=18,	GGGGACCAGGTGCCGTAAGTCCCATGTGGGCTTTATCACGCATTAATTAAATTTCTAAAATGGTTGGATGTCTCGGATCTGCTATATAACTGTCTAGAAATAAAGAGTATCATCTTTCAAACGTCGGGATTCGCGATCCTAGGGCGATCA
409	409	4.2523	SetName|SetName=duplicate barcodes hubs#Context|Name=context_CloseRandSeqs1#Barcode|Sequence=TCGACGTACGC,Start=19,End=29,#Primer5|Sequence=GGGGACCAGGTGCCGTAAG,Start=132,End=150,#Primer3|Sequence=GCGATCCTAGGGCGATCA,Start=1,End=18,	GGGGACCAGGTGCCGTAAGAATTACTAAAAATCAGACATTATATAGGAGTCTAATAAGTCAGACGACTTATGGTGTAGAATCTATATAACTGTCTAGAAATAAAGAGTATCATCTTTCAAATCGACGTACGCGCGATCCTAGGGCGATCA
410	410	5.1297	SetName|SetName=duplicate barcodes hubs#Context|Name=context_OpenRandSeqs1#Barcode|Sequence=AGGTAACGATT,Start=19,End=29,#Primer5|Sequence=GGGGACCAGGTGCCGTAAG,Start=132,End=150,#Primer3|Sequence=GCGATCCTAGGGCGATCA,Start=1,End=18,	GGGGACCAGGTGCCGTAAGTCCCATGTGGGCTTTATCACGCATTAATTAAATTTCTAAAATGGTTGGATGTCTCGGATCTGCTATATAACTGTCTAGAAATAAAGAGTATCATCTTTCAAAAGGTAACGATTGCGATCCTAGGGCGATCA
411	411	3.7963	SetName|SetName=duplicate barcodes hubs#Context|Name=context_CloseRandSeqs1#Barcode|Sequence=ATAGCTAGGAG,Start=19,End=29,#Primer5|Sequence=GGGGACCAGGTGCCGTAAG,Start=132,End=150,#Primer3|Sequence=GCGATCCTAGGGCGATCA,Start=1,End=18,	GGGGACCAGGTGCCGTAAGAATTACTAAAAATCAGACATTATATAGGAGTCTAATAAGTCAGACGACTTATGGTGTAGAATCTATATAACTGTCTAGAAATAAAGAGTATCATCTTTCAAAATAGCTAGGAGGCGATCCTAGGGCGATCA
412	412	0.3424	SetName|SetName=duplicate barcodes hubs#Context|Name=context_OpenRandSeqs1#Barcode|Sequence=GGTTCTCAGAA,Start=19,End=29,#Primer5|Sequence=GGGGACCAGGTGCCGTAAG,Start=132,End=150,#Primer3|Sequence=GCGATCCTAGGGCGATCA,Start=1,End=18,	GGGGACCAGGTGCCGTAAGTCCCATGTGGGCTTTATCACGCATTAATTAAATTTCTAAAATGGTTGGATGTCTCGGATCTGCTATATAACTGTCTAGAAATAAAGAGTATCATCTTTCAAAGGTTCTCAGAAGCGATCCTAGGGCGATCA
413	413	2.0489	SetName|SetName=duplicate barcodes hubs#Context|Name=context_CloseRandSeqs1#Barcode|Sequence=GCTGCCGACTG,Start=19,End=29,#Primer5|Sequence=GGGGACCAGGTGCCGTAAG,Start=132,End=150,#Primer3|Sequence=GCGATCCTAGGGCGATCA,Start=1,End=18,	GGGGACCAGGTGCCGTAAGAATTACTAAAAATCAGACATTATATAGGAGTCTAATAAGTCAGACGACTTATGGTGTAGAATCTATATAACTGTCTAGAAATAAAGAGTATCATCTTTCAAAGCTGCCGACTGGCGATCCTAGGGCGATCA
414	414	0.3599	SetName|SetName=duplicate barcodes hubs#Context|Name=context_OpenRandSeqs1#Barcode|Sequence=CATTACAGAAA,Start=19,End=29,#Primer5|Sequence=GGGGACCAGGTGCCGTAAG,Start=132,End=150,#Primer3|Sequence=GCGATCCTAGGGCGATCA,Start=1,End=18,	GGGGACCAGGTGCCGTAAGTCCCATGTGGGCTTTATCACGCATTAATTAAATTTCTAAAATGGTTGGATGTCTCGGATCTGCTATATAACTGTCTAGAAATAAAGAGTATCATCTTTCAAACATTACAGAAAGCGATCCTAGGGCGATCA
415	415	3.4196	SetName|SetName=duplicate barcodes hubs#Context|Name=context_CloseRandSeqs1#Barcode|Sequence=CCCAGAGGGCA,Start=19,End=29,#Primer5|Sequence=GGGGACCAGGTGCCGTAAG,Start=132,End=150,#Primer3|Sequence=GCGATCCTAGGGCGATCA,Start=1,End=18,	GGGGACCAGGTGCCGTAAGAATTACTAAAAATCAGACATTATATAGGAGTCTAATAAGTCAGACGACTTATGGTGTAGAATCTATATAACTGTCTAGAAATAAAGAGTATCATCTTTCAAACCCAGAGGGCAGCGATCCTAGGGCGATCA
416	416	0.3164	SetName|SetName=duplicate barcodes hubs#Context|Name=context_OpenRandSeqs1#Barcode|Sequence=GCCTATGCCGA,Start=19,End=29,#Primer5|Sequence=GGGGACCAGGTGCCGTAAG,Start=132,End=150,#Primer3|Sequence=GCGATCCTAGGGCGATCA,Start=1,End=18,	GGGGACCAGGTGCCGTAAGTCCCATGTGGGCTTTATCACGCATTAATTAAATTTCTAAAATGGTTGGATGTCTCGGATCTGCTATATAACTGTCTAGAAATAAAGAGTATCATCTTTCAAAGCCTATGCCGAGCGATCCTAGGGCGATCA
417	417	4.2262	SetName|SetName=duplicate barcodes hubs#Context|Name=context_CloseRandSeqs1#Barcode|Sequence=TCGCAACGCGT,Start=19,End=29,#Primer5|Sequence=GGGGACCAGGTGCCGTAAG,Start=132,End=150,#Primer3|Sequence=GCGATCCTAGGGCGATCA,Start=1,End=18,	GGGGACCAGGTGCCGTAAGAATTACTAAAAATCAGACATTATATAGGAGTCTAATAAGTCAGACGACTTATGGTGTAGAATCTATATAACTGTCTAGAAATAAAGAGTATCATCTTTCAAATCGCAACGCGTGCGATCCTAGGGCGATCA
418	418	0.3826	SetName|SetName=duplicate barcodes hubs#Context|Name=context_OpenRandSeqs1#Barcode|Sequence=ATTGACCGCAT,Start=19,End=29,#Primer5|Sequence=GGGGACCAGGTGCCGTAAG,Start=132,End=150,#Primer3|Sequence=GCGATCCTAGGGCGATCA,Start=1,End=18,	GGGGACCAGGTGCCGTAAGTCCCATGTGGGCTTTATCACGCATTAATTAAATTTCTAAAATGGTTGGATGTCTCGGATCTGCTATATAACTGTCTAGAAATAAAGAGTATCATCTTTCAAAATTGACCGCATGCGATCCTAGGGCGATCA
419	419	4.2896	SetName|SetName=duplicate barcodes hubs#Context|Name=context_CloseRandSeqs1#Barcode|Sequence=GTCGTCGTTTA,Start=19,End=29,#Primer5|Sequence=GGGGACCAGGTGCCGTAAG,Start=132,End=150,#Primer3|Sequence=GCGATCCTAGGGCGATCA,Start=1,End=18,	GGGGACCAGGTGCCGTAAGAATTACTAAAAATCAGACATTATATAGGAGTCTAATAAGTCAGACGACTTATGGTGTAGAATCTATATAACTGTCTAGAAATAAAGAGTATCATCTTTCAAAGTCGTCGTTTAGCGATCCTAGGGCGATCA
420	420	0.321	SetName|SetName=duplicate barcodes hubs#Context|Name=context_OpenRandSeqs1#Barcode|Sequence=GGCGACTACGT,Start=19,End=29,#Primer5|Sequence=GGGGACCAGGTGCCGTAAG,Start=132,End=150,#Primer3|Sequence=GCGATCCTAGGGCGATCA,Start=1,End=18,	GGGGACCAGGTGCCGTAAGTCCCATGTGGGCTTTATCACGCATTAATTAAATTTCTAAAATGGTTGGATGTCTCGGATCTGCTATATAACTGTCTAGAAATAAAGAGTATCATCTTTCAAAGGCGACTACGTGCGATCCTAGGGCGATCA
421	421	3.591	SetName|SetName=duplicate barcodes hubs#Context|Name=context_CloseRandSeqs1#Barcode|Sequence=CAGCGTTAATC,Start=19,End=29,#Primer5|Sequence=GGGGACCAGGTGCCGTAAG,Start=132,End=150,#Primer3|Sequence=GCGATCCTAGGGCGATCA,Start=1,End=18,	GGGGACCAGGTGCCGTAAGAATTACTAAAAATCAGACATTATATAGGAGTCTAATAAGTCAGACGACTTATGGTGTAGAATCTATATAACTGTCTAGAAATAAAGAGTATCATCTTTCAAACAGCGTTAATCGCGATCCTAGGGCGATCA
422	422	0.6412	SetName|SetName=duplicate barcodes hubs#Context|Name=context_OpenRandSeqs1#Barcode|Sequence=AAGCTTAAAGC,Start=19,End=29,#Primer5|Sequence=GGGGACCAGGTGCCGTAAG,Start=132,End=150,#Primer3|Sequence=GCGATCCTAGGGCGATCA,Start=1,End=18,	GGGGACCAGGTGCCGTAAGTCCCATGTGGGCTTTATCACGCATTAATTAAATTTCTAAAATGGTTGGATGTCTCGGATCTGCTATATAACTGTCTAGAAATAAAGAGTATCATCTTTCAAAAAGCTTAAAGCGCGATCCTAGGGCGATCA
423	423	4.1858	SetName|SetName=duplicate barcodes hubs#Context|Name=context_CloseRandSeqs1#Barcode|Sequence=GCCCGTTTAGA,Start=19,End=29,#Primer5|Sequence=GGGGACCAGGTGCCGTAAG,Start=132,End=150,#Primer3|Sequence=GCGATCCTAGGGCGATCA,Start=1,End=18,	GGGGACCAGGTGCCGTAAGAATTACTAAAAATCAGACATTATATAGGAGTCTAATAAGTCAGACGACTTATGGTGTAGAATCTATATAACTGTCTAGAAATAAAGAGTATCATCTTTCAAAGCCCGTTTAGAGCGATCCTAGGGCGATCA
424	424	0.5041	SetName|SetName=duplicate barcodes hubs#Context|Name=context_OpenRandSeqs1#Barcode|Sequence=CTAACTACGTG,Start=19,End=29,#Primer5|Sequence=GGGGACCAGGTGCCGTAAG,Start=132,End=150,#Primer3|Sequence=GCGATCCTAGGGCGATCA,Start=1,End=18,	GGGGACCAGGTGCCGTAAGTCCCATGTGGGCTTTATCACGCATTAATTAAATTTCTAAAATGGTTGGATGTCTCGGATCTGCTATATAACTGTCTAGAAATAAAGAGTATCATCTTTCAAACTAACTACGTGGCGATCCTAGGGCGATCA
425	425		SetName|SetName=duplicate barcodes hubs#Context|Name=context_CloseRandSeqs1#Barcode|Sequence=AAATTAACGTC,Start=19,End=29,#Primer5|Sequence=GGGGACCAGGTGCCGTAAG,Start=132,End=150,#Primer3|Sequence=GCGATCCTAGGGCGATCA,Start=1,End=18,	GGGGACCAGGTGCCGTAAGAATTACTAAAAATCAGACATTATATAGGAGTCTAATAAGTCAGACGACTTATGGTGTAGAATCTATATAACTGTCTAGAAATAAAGAGTATCATCTTTCAAAAAATTAACGTCGCGATCCTAGGGCGATCA
426	426	0.4681	SetName|SetName=duplicate barcodes hubs#Context|Name=context_OpenRandSeqs1#Barcode|Sequence=CTTTCTCATTG,Start=19,End=29,#Primer5|Sequence=GGGGACCAGGTGCCGTAAG,Start=132,End=150,#Primer3|Sequence=GCGATCCTAGGGCGATCA,Start=1,End=18,	GGGGACCAGGTGCCGTAAGTCCCATGTGGGCTTTATCACGCATTAATTAAATTTCTAAAATGGTTGGATGTCTCGGATCTGCTATATAACTGTCTAGAAATAAAGAGTATCATCTTTCAAACTTTCTCATTGGCGATCCTAGGGCGATCA
427	427	4.4973	SetName|SetName=duplicate barcodes hubs#Context|Name=context_CloseRandSeqs1#Barcode|Sequence=TCGACATTAAC,Start=19,End=29,#Primer5|Sequence=GGGGACCAGGTGCCGTAAG,Start=132,End=150,#Primer3|Sequence=GCGATCCTAGGGCGATCA,Start=1,End=18,	GGGGACCAGGTGCCGTAAGAATTACTAAAAATCAGACATTATATAGGAGTCTAATAAGTCAGACGACTTATGGTGTAGAATCTATATAACTGTCTAGAAATAAAGAGTATCATCTTTCAAATCGACATTAACGCGATCCTAGGGCGATCA
428	428	0.2884	SetName|SetName=duplicate barcodes hubs#Context|Name=context_OpenRandSeqs1#Barcode|Sequence=CAGCGAATTGC,Start=19,End=29,#Primer5|Sequence=GGGGACCAGGTGCCGTAAG,Start=132,End=150,#Primer3|Sequence=GCGATCCTAGGGCGATCA,Start=1,End=18,	GGGGACCAGGTGCCGTAAGTCCCATGTGGGCTTTATCACGCATTAATTAAATTTCTAAAATGGTTGGATGTCTCGGATCTGCTATATAACTGTCTAGAAATAAAGAGTATCATCTTTCAAACAGCGAATTGCGCGATCCTAGGGCGATCA
429	429	2.6597	SetName|SetName=duplicate barcodes hubs#Context|Name=context_CloseRandSeqs1#Barcode|Sequence=TCGCAACAGCC,Start=19,End=29,#Primer5|Sequence=GGGGACCAGGTGCCGTAAG,Start=132,End=150,#Primer3|Sequence=GCGATCCTAGGGCGATCA,Start=1,End=18,	GGGGACCAGGTGCCGTAAGAATTACTAAAAATCAGACATTATATAGGAGTCTAATAAGTCAGACGACTTATGGTGTAGAATCTATATAACTGTCTAGAAATAAAGAGTATCATCTTTCAAATCGCAACAGCCGCGATCCTAGGGCGATCA
430	430	4.783	SetName|SetName=duplicate barcodes hubs pos neg#Context|Name=context_canon_term_pos_YAL016W#Barcode|Sequence=GTGGCACTCGA,Start=19,End=29,#Primer5|Sequence=GGGGACCAGGTGCCGTAAG,Start=132,End=150,#Primer3|Sequence=GCGATCCTAGGGCGATCA,Start=1,End=18,	GGGGACCAGGTGCCGTAAGTACTAGTTCAAATATATACATACATACACATATGTACACTTGAATGAATAAAAAGTATACATATTAACAACTAGGCCTGCTTTCTTTTCTTTTCTTTTTTTTGTGGCACTCGAGCGATCCTAGGGCGATCA
431	431	3.5614	SetName|SetName=duplicate barcodes hubs pos neg#Context|Name=context_canon_term_pos_YAR007C#Barcode|Sequence=AGAACGATAGC,Start=19,End=29,#Primer5|Sequence=GGGGACCAGGTGCCGTAAG,Start=132,End=150,#Primer3|Sequence=GCGATCCTAGGGCGATCA,Start=1,End=18,	GGGGACCAGGTGCCGTAAGTGTATCAAATAATCAAGTACTATTTAATCTATGTAACATATGAGAAATGTAAAAAAAAAACTTCTATTTCGTCAAGTTTTTGAAGGGCGGTTCAGCATCTCTAGAACGATAGCGCGATCCTAGGGCGATCA
432	432	4.2783	SetName|SetName=duplicate barcodes hubs pos neg#Context|Name=context_canon_term_pos_YAL044C#Barcode|Sequence=ATACTGAATGC,Start=19,End=29,#Primer5|Sequence=GGGGACCAGGTGCCGTAAG,Start=132,End=150,#Primer3|Sequence=GCGATCCTAGGGCGATCA,Start=1,End=18,	GGGGACCAGGTGCCGTAAGACAAAGCTTATACGTACGTAAAGTAATTTCATATATATGTATATATATGTAGGGGAAATAAAACAATAAACTCAACGTGTACACTTATGCTTATGCATTCTAATACTGAATGCGCGATCCTAGGGCGATCA
433	433	3.2454	SetName|SetName=duplicate barcodes hubs pos neg#Context|Name=context_canon_term_pos_YBR252W#Barcode|Sequence=TGGACTCTTGT,Start=19,End=29,#Primer5|Sequence=GGGGACCAGGTGCCGTAAG,Start=132,End=150,#Primer3|Sequence=GCGATCCTAGGGCGATCA,Start=1,End=18,	GGGGACCAGGTGCCGTAAGCTTAGTGTATATACTTTGGCACACTTGTATAATGTATAATAAAATCAGGATAAATCCAGTGTGACCCGGACTGAATTACTGAAACTTTGAAGTGTTAAGGAATGGACTCTTGTGCGATCCTAGGGCGATCA
434	434	4.3903	SetName|SetName=duplicate barcodes hubs pos neg#Context|Name=context_canon_term_pos_YDR394W#Barcode|Sequence=CTGCAAGCCGC,Start=19,End=29,#Primer5|Sequence=GGGGACCAGGTGCCGTAAG,Start=132,End=150,#Primer3|Sequence=GCGATCCTAGGGCGATCA,Start=1,End=18,	GGGGACCAGGTGCCGTAAGTTACCATATATGCTTCAACGTAGGTCTACATAAAGTATTACGTACATTTCTATCTAGACAACACTAAATGAAATAAATACAGACGCCACTTTTTTATCACGTCTGCAAGCCGCGCGATCCTAGGGCGATCA
435	435	2.6867	SetName|SetName=duplicate barcodes hubs pos neg#Context|Name=context_canon_term_pos_YDR375C#Barcode|Sequence=GTGAGCAGCGC,Start=19,End=29,#Primer5|Sequence=GGGGACCAGGTGCCGTAAG,Start=132,End=150,#Primer3|Sequence=GCGATCCTAGGGCGATCA,Start=1,End=18,	GGGGACCAGGTGCCGTAAGGTGCTAAGTGGCGCCTTACTACATAACTTGTATATAATAAAAATTCAGAAGATGCTTTAACTTTTTCTCGTTAATAAGACCGAGTTATTTGCTATTACGAACGTGAGCAGCGCGCGATCCTAGGGCGATCA
436	436	2.8155	SetName|SetName=duplicate barcodes hubs pos neg#Context|Name=context_canon_term_pos_YDR050C#Barcode|Sequence=GTTAGTAGCAA,Start=19,End=29,#Primer5|Sequence=GGGGACCAGGTGCCGTAAG,Start=132,End=150,#Primer3|Sequence=GCGATCCTAGGGCGATCA,Start=1,End=18,	GGGGACCAGGTGCCGTAAGGATTAATATAATTATATAAAAATATTATCTTCTTTTCTTTATATCTAGTGTTATGTAAAATAAATTGATGACTACGGAAAGCTTTTTTATATTGTTTCTTTTGTTAGTAGCAAGCGATCCTAGGGCGATCA
437	437	2.2843	SetName|SetName=duplicate barcodes hubs pos neg#Context|Name=context_canon_term_pos_YDL044C#Barcode|Sequence=TGATCTATTGA,Start=19,End=29,#Primer5|Sequence=GGGGACCAGGTGCCGTAAG,Start=132,End=150,#Primer3|Sequence=GCGATCCTAGGGCGATCA,Start=1,End=18,	GGGGACCAGGTGCCGTAAGAAAATTATTCAAACCTTGTAAATAGTGTTATATATATGTGTTAGACTTAAAAGCGCTAATAAACGTTCCTGCTCGCATTTAACTTCTGTTCCAATTTTCCTATGATCTATTGAGCGATCCTAGGGCGATCA
438	438	1.3271	SetName|SetName=duplicate barcodes hubs pos neg#Context|Name=context_canon_term_pos_YDL227C#Barcode|Sequence=TATCTCAAACC,Start=19,End=29,#Primer5|Sequence=GGGGACCAGGTGCCGTAAG,Start=132,End=150,#Primer3|Sequence=GCGATCCTAGGGCGATCA,Start=1,End=18,	GGGGACCAGGTGCCGTAAGAATGTGTATATTAGTTTAAAAAGTTGTATGTAATAAAAGTAAAATTTAATATTTTGGATGAAAAAAACCATTTTTAGACTTTTTCTTAACTAGAATGCTGGATATCTCAAACCGCGATCCTAGGGCGATCA
439	439	4.584	SetName|SetName=duplicate barcodes hubs pos neg#Context|Name=context_canon_term_pos_YEL059C_A#Barcode|Sequence=GAGCGTCGATT,Start=19,End=29,#Primer5|Sequence=GGGGACCAGGTGCCGTAAG,Start=132,End=150,#Primer3|Sequence=GCGATCCTAGGGCGATCA,Start=1,End=18,	GGGGACCAGGTGCCGTAAGAAATTACATATACTCTATATAGCACAGTAGTGTGATAAATAAAAAATTTTGCCAAGACTTTTTTAAACTGCACCCGACAGATCAGGTCTGTGCCTACTATGCGAGCGTCGATTGCGATCCTAGGGCGATCA
440	440	4.9276	SetName|SetName=duplicate barcodes hubs pos neg#Context|Name=context_canon_term_pos_YFL009W#Barcode|Sequence=CAGATAGGCTC,Start=19,End=29,#Primer5|Sequence=GGGGACCAGGTGCCGTAAG,Start=132,End=150,#Primer3|Sequence=GCGATCCTAGGGCGATCA,Start=1,End=18,	GGGGACCAGGTGCCGTAAGCCTTTCCCAGAGAATAAGCATTGACTCATACTTAGATAATATAGCTTAATAAGTAGTTATATAATCAGTAAAAAAGTACAATAACAACTTCGTACATTTTATCAGATAGGCTCGCGATCCTAGGGCGATCA
441	441	4.0556	SetName|SetName=duplicate barcodes hubs pos neg#Context|Name=context_canon_term_pos_YFR039C#Barcode|Sequence=ATCGCACAGAA,Start=19,End=29,#Primer5|Sequence=GGGGACCAGGTGCCGTAAG,Start=132,End=150,#Primer3|Sequence=GCGATCCTAGGGCGATCA,Start=1,End=18,	GGGGACCAGGTGCCGTAAGTCAATATATAGGTATGTATATGTACATATATACAAACATTTAATAAAAACAATATTGTATGATAACCAAGTTAAAGACCGGAGGTTGTTTCAAATAGCTTGAATCGCACAGAAGCGATCCTAGGGCGATCA
442	442	3.017	SetName|SetName=duplicate barcodes hubs pos neg#Context|Name=context_canon_term_pos_YGR166W#Barcode|Sequence=AGGTCTCCCTA,Start=19,End=29,#Primer5|Sequence=GGGGACCAGGTGCCGTAAG,Start=132,End=150,#Primer3|Sequence=GCGATCCTAGGGCGATCA,Start=1,End=18,	GGGGACCAGGTGCCGTAAGGCGGAACAAGTATACATTTTATTAACATAGACTACATACTAATCTGTAACATTTCTATAAAAAAGTTATTATCATCACATTACACGATAGAAACACTTCCATAGGTCTCCCTAGCGATCCTAGGGCGATCA
443	443	2.6725	SetName|SetName=duplicate barcodes hubs pos neg#Context|Name=context_canon_term_pos_YHR200W#Barcode|Sequence=CGGACCGGGAT,Start=19,End=29,#Primer5|Sequence=GGGGACCAGGTGCCGTAAG,Start=132,End=150,#Primer3|Sequence=GCGATCCTAGGGCGATCA,Start=1,End=18,	GGGGACCAGGTGCCGTAAGTAGTGTACAAAAATATCTATATGGGTCATATATAAACCAAATAAAGCATATATAACATCTCCCTTCACTCTTCCAGGTTTGAGTACGCTTCCTCTAAATAGGCGGACCGGGATGCGATCCTAGGGCGATCA
444	444	2.6649	SetName|SetName=duplicate barcodes hubs pos neg#Context|Name=context_canon_term_pos_YIR021W#Barcode|Sequence=ATGGTAAATCC,Start=19,End=29,#Primer5|Sequence=GGGGACCAGGTGCCGTAAG,Start=132,End=150,#Primer3|Sequence=GCGATCCTAGGGCGATCA,Start=1,End=18,	GGGGACCAGGTGCCGTAAGTCCTCTTATATAGCATGTAAATAGAAAGTACGTAAAAAAAAGCTACTATTGACTTTATTCTCCGTGAGGGCGGTTCTTTCTGTAGCTGTTGGTTTTTTCCAGATGGTAAATCCGCGATCCTAGGGCGATCA
445	445	3.0885	SetName|SetName=duplicate barcodes hubs pos neg#Context|Name=context_canon_term_pos_YIR035C#Barcode|Sequence=TCGAATCTAAC,Start=19,End=29,#Primer5|Sequence=GGGGACCAGGTGCCGTAAG,Start=132,End=150,#Primer3|Sequence=GCGATCCTAGGGCGATCA,Start=1,End=18,	GGGGACCAGGTGCCGTAAGGGATAGCAGGTACATATAAATTGTTACATACTAAGTCGATGAGTCAAAAAAGACTCTTATACATTTATACATTTTGCATTATTATTTTTTTTTTCCAGCGGATCGAATCTAACGCGATCCTAGGGCGATCA
446	446	4.3769	SetName|SetName=duplicate barcodes hubs pos neg#Context|Name=context_canon_term_pos_YIL115C#Barcode|Sequence=TGCAGACTGGT,Start=19,End=29,#Primer5|Sequence=GGGGACCAGGTGCCGTAAG,Start=132,End=150,#Primer3|Sequence=GCGATCCTAGGGCGATCA,Start=1,End=18,	GGGGACCAGGTGCCGTAAGTGATATTTAGCTATATGTACGTTGTTAGTGCCGTTAATAATAAATTCATCCTCTATCATAGAAACAGGGCATGAGAAACGAAGAAAAATTGATATTGTAACATGCAGACTGGTGCGATCCTAGGGCGATCA
447	447	3.9442	SetName|SetName=duplicate barcodes hubs pos neg#Context|Name=context_canon_term_pos_YJL050W#Barcode|Sequence=CCCGCCTTTGG,Start=19,End=29,#Primer5|Sequence=GGGGACCAGGTGCCGTAAG,Start=132,End=150,#Primer3|Sequence=GCGATCCTAGGGCGATCA,Start=1,End=18,	GGGGACCAGGTGCCGTAAGTTAATCACACACAATTATGTATTTTTATTGGTATATATAATAAACAAATAGATTTCATCAACATTTATTATATAATAACATTTTTGTTTGGGCAAGCACACTCCCGCCTTTGGGCGATCCTAGGGCGATCA
448	448	3.6371	SetName|SetName=duplicate barcodes hubs pos neg#Context|Name=context_canon_term_pos_YJR100C#Barcode|Sequence=CAGTGAGGTTG,Start=19,End=29,#Primer5|Sequence=GGGGACCAGGTGCCGTAAG,Start=132,End=150,#Primer3|Sequence=GCGATCCTAGGGCGATCA,Start=1,End=18,	GGGGACCAGGTGCCGTAAGGTGAATTATATATTTAAAAGAATTCTGTAAATACATATTTGACTACGCAGTAATAAAACAATTATTATTCCCAATTAGGGCCCAATCCTAGCATAGCAAAGTCAGTGAGGTTGGCGATCCTAGGGCGATCA
449	449	3.1426	SetName|SetName=duplicate barcodes hubs pos neg#Context|Name=context_canon_term_pos_YJL204C#Barcode|Sequence=ACGTTCGCTAA,Start=19,End=29,#Primer5|Sequence=GGGGACCAGGTGCCGTAAG,Start=132,End=150,#Primer3|Sequence=GCGATCCTAGGGCGATCA,Start=1,End=18,	GGGGACCAGGTGCCGTAAGATTCCTATCAATGATTAATTATATTACTCTATATAGGTATGAAGTGCGGAAATAAAAGACTGTTCACATATTAGATTATTCAAGATTACGCGGGCTCTATTTACGTTCGCTAAGCGATCCTAGGGCGATCA
450	450	3.1463	SetName|SetName=duplicate barcodes hubs pos neg#Context|Name=context_canon_term_pos_YLR064W#Barcode|Sequence=GTGAAGCTAGT,Start=19,End=29,#Primer5|Sequence=GGGGACCAGGTGCCGTAAG,Start=132,End=150,#Primer3|Sequence=GCGATCCTAGGGCGATCA,Start=1,End=18,	GGGGACCAGGTGCCGTAAGCATGCTCATTTTAAGTATATCTAAATATTATTTTGTATATACTCACACTCCTCTATAGAAAGCAAAAAATTTCAAAAACGTTTGAAAAGCTTTGTTTAACGAGTGAAGCTAGTGCGATCCTAGGGCGATCA
451	451	2.2677	SetName|SetName=duplicate barcodes hubs pos neg#Context|Name=context_canon_term_pos_YLR298C#Barcode|Sequence=TACGGGCCTAT,Start=19,End=29,#Primer5|Sequence=GGGGACCAGGTGCCGTAAG,Start=132,End=150,#Primer3|Sequence=GCGATCCTAGGGCGATCA,Start=1,End=18,	GGGGACCAGGTGCCGTAAGCGCTATCAGATTAGATTATTAAATATTATATGTAGACTATATTTTGCCAAAAAAAACAATAGAGATATCAACAACGAATGAAAATGGTATGATGAGAATAAATACGGGCCTATGCGATCCTAGGGCGATCA
452	452	4.8272	SetName|SetName=duplicate barcodes hubs pos neg#Context|Name=context_canon_term_pos_YLR272C#Barcode|Sequence=TCGTGGAGACT,Start=19,End=29,#Primer5|Sequence=GGGGACCAGGTGCCGTAAG,Start=132,End=150,#Primer3|Sequence=GCGATCCTAGGGCGATCA,Start=1,End=18,	GGGGACCAGGTGCCGTAAGTCGAACTGACGTTTACCCGTTTCTTCCGTTTTATATTATATGTTATTATATAAATAAAAGCTGTTCATTTCTTTCTTCTTGAAATATGACTTTACCTATCTCTCGTGGAGACTGCGATCCTAGGGCGATCA
453	453	4.2293	SetName|SetName=duplicate barcodes hubs pos neg#Context|Name=context_canon_term_pos_YNR049C#Barcode|Sequence=ATGTCGTTAGA,Start=19,End=29,#Primer5|Sequence=GGGGACCAGGTGCCGTAAG,Start=132,End=150,#Primer3|Sequence=GCGATCCTAGGGCGATCA,Start=1,End=18,	GGGGACCAGGTGCCGTAAGATAGCACTATACCTTGCTGAAATAAAGCGAAAAGAACATTTAATGAATATATAGGTATCGTATATGTACTGAATAAAGTGTTTGATACAGAATGCAAGGAGAATGTCGTTAGAGCGATCCTAGGGCGATCA
454	454	2.2699	SetName|SetName=duplicate barcodes hubs pos neg#Context|Name=context_canon_term_pos_YNL011C#Barcode|Sequence=AGTCGGTATCT,Start=19,End=29,#Primer5|Sequence=GGGGACCAGGTGCCGTAAG,Start=132,End=150,#Primer3|Sequence=GCGATCCTAGGGCGATCA,Start=1,End=18,	GGGGACCAGGTGCCGTAAGTGCAACTATGTCGCTCATTAACGGTTATTATAGTGAAGACTACATAATAAAGACATAGATAATAAAAAAGAATCGCGTTTGAACCATGTTTTATTTAACCATAGTCGGTATCTGCGATCCTAGGGCGATCA
455	455	1.8191	SetName|SetName=duplicate barcodes hubs pos neg#Context|Name=context_canon_term_pos_YNL231C#Barcode|Sequence=ATTGACAGCGC,Start=19,End=29,#Primer5|Sequence=GGGGACCAGGTGCCGTAAG,Start=132,End=150,#Primer3|Sequence=GCGATCCTAGGGCGATCA,Start=1,End=18,	GGGGACCAGGTGCCGTAAGAGGCAAATTTAGATAGATAATGATAATGCACTATAATATATAATAAATAAAAGAGAATAAAAAGTTTAATCACGTTCCCGCTTCTTTTTCCTAACCATCAAAATTGACAGCGCGCGATCCTAGGGCGATCA
456	456	1.7231	SetName|SetName=duplicate barcodes hubs pos neg#Context|Name=context_canon_term_pos_YOL009C#Barcode|Sequence=AGTCACTAACT,Start=19,End=29,#Primer5|Sequence=GGGGACCAGGTGCCGTAAG,Start=132,End=150,#Primer3|Sequence=GCGATCCTAGGGCGATCA,Start=1,End=18,	GGGGACCAGGTGCCGTAAGTTTAACAAAGATAGTTTGAAAATAGTGTCTACATAAAAAAACAAACATTTTTGAGCTGGAAAATTATATTTTGTCATGAAGTAATCTATTCTTAACGCGCTTAGTCACTAACTGCGATCCTAGGGCGATCA
457	457	4.0424	SetName|SetName=duplicate barcodes hubs pos neg#Context|Name=context_canon_term_pos_YOL073C#Barcode|Sequence=CTACCCGAGAA,Start=19,End=29,#Primer5|Sequence=GGGGACCAGGTGCCGTAAG,Start=132,End=150,#Primer3|Sequence=GCGATCCTAGGGCGATCA,Start=1,End=18,	GGGGACCAGGTGCCGTAAGTTTATATCAGCATATACCTACATAAACAAATAAACATAGCAACGGTTTAGCAACATCGTTTACAGCCATGTGAGGCAGTTACTTCTATCATATGTCTGGCTTCTACCCGAGAAGCGATCCTAGGGCGATCA
458	458	3.9327	SetName|SetName=duplicate barcodes hubs pos neg#Context|Name=context_canon_term_pos_YPL006W#Barcode|Sequence=AGTACTTGTTT,Start=19,End=29,#Primer5|Sequence=GGGGACCAGGTGCCGTAAG,Start=132,End=150,#Primer3|Sequence=GCGATCCTAGGGCGATCA,Start=1,End=18,	GGGGACCAGGTGCCGTAAGCCATAGCAGATTATACTATATTTTACGTAGTGAAAAAATAGGTAAAAATTCGTTAATTATTCTGATGCCACACCAGAAAATCTGTGGGAAAATTTTTCGAGTAGTACTTGTTTGCGATCCTAGGGCGATCA
459	459	0.6125	SetName|SetName=duplicate barcodes hubs pos neg#Context|Name=context_canon_term_neg_YBL097W#Barcode|Sequence=GCTCAATGAAA,Start=19,End=29,#Primer5|Sequence=GGGGACCAGGTGCCGTAAG,Start=132,End=150,#Primer3|Sequence=GCGATCCTAGGGCGATCA,Start=1,End=18,	GGGGACCAGGTGCCGTAAGTTGATGATCTTTTTTTTTTTTTTTTTTTTTTTTTTTGTGCTGCAAAGTTTCTTAAAGCCTTCGGGCTTACGAAATCCTTTATCGCCGAAAGGGGACCGCTTCGCTCAATGAAAGCGATCCTAGGGCGATCA
460	460	4.6341	SetName|SetName=duplicate barcodes hubs pos neg#Context|Name=context_canon_term_neg_YBL075C#Barcode|Sequence=GTATCTCGCGA,Start=19,End=29,#Primer5|Sequence=GGGGACCAGGTGCCGTAAG,Start=132,End=150,#Primer3|Sequence=GCGATCCTAGGGCGATCA,Start=1,End=18,	GGGGACCAGGTGCCGTAAGTTATTCTTCTATAGTGTTCTATTTAGCTACTTTTTATGTTTAACCTTTTATACGATGGCGGGTAATCTATCCATGATGACGAAAAATTTTTTTTTTTTTTGTGTATCTCGCGAGCGATCCTAGGGCGATCA
461	461	3.3613	SetName|SetName=duplicate barcodes hubs pos neg#Context|Name=context_canon_term_neg_YBL088C#Barcode|Sequence=TAAGTATCTAC,Start=19,End=29,#Primer5|Sequence=GGGGACCAGGTGCCGTAAG,Start=132,End=150,#Primer3|Sequence=GCGATCCTAGGGCGATCA,Start=1,End=18,	GGGGACCAGGTGCCGTAAGTTGCTATGCAGATGCTTTATACTTCTTTTTTTTGTTTATAGAAATACGAAAAGTAATGTACAAACTCAATGTGATGATGTGCCCAAAAATACAATCGCTGATTAAGTATCTACGCGATCCTAGGGCGATCA
462	462	2.3873	SetName|SetName=duplicate barcodes hubs pos neg#Context|Name=context_canon_term_neg_YCR032W#Barcode|Sequence=CGAATCTGAGT,Start=19,End=29,#Primer5|Sequence=GGGGACCAGGTGCCGTAAG,Start=132,End=150,#Primer3|Sequence=GCGATCCTAGGGCGATCA,Start=1,End=18,	GGGGACCAGGTGCCGTAAGGCATCACATCGTAACGCCTTTCTTTAAATGATTCAATTTTTGTAGTTTATATCTTTACTTTTGAAACTGATTTCTCATCCCATCTAGTATTGTAATTGCGTACGAATCTGAGTGCGATCCTAGGGCGATCA
463	463	0.71	SetName|SetName=duplicate barcodes hubs pos neg#Context|Name=context_canon_term_neg_YDR325W#Barcode|Sequence=CTGCATTGACG,Start=19,End=29,#Primer5|Sequence=GGGGACCAGGTGCCGTAAG,Start=132,End=150,#Primer3|Sequence=GCGATCCTAGGGCGATCA,Start=1,End=18,	GGGGACCAGGTGCCGTAAGAATTGATATGCGAGCTCTTCATCTATTTAAGTTGATTTTTTGGTTGTAAACATATTTGTATTTTATTCTTAGGTTTGTTAATTCTTCTACGCTTACCAGATACTGCATTGACGGCGATCCTAGGGCGATCA
464	464	3.452	SetName|SetName=duplicate barcodes hubs pos neg#Context|Name=context_canon_term_neg_YDR457W#Barcode|Sequence=GGTTCTTTAAA,Start=19,End=29,#Primer5|Sequence=GGGGACCAGGTGCCGTAAG,Start=132,End=150,#Primer3|Sequence=GCGATCCTAGGGCGATCA,Start=1,End=18,	GGGGACCAGGTGCCGTAAGTCATTTTTCGTGTAAATTTATAGCGCCATGTAACCAAGTATTTTAGAACGTCTTTTATTTAAACCTTTAACCATACAACACTTGCCCAAGGAAGAGGAACAGGGTTCTTTAAAGCGATCCTAGGGCGATCA
465	465	0.5485	SetName|SetName=duplicate barcodes hubs pos neg#Context|Name=context_canon_term_neg_YDL205C#Barcode|Sequence=CCAGTTGTTCA,Start=19,End=29,#Primer5|Sequence=GGGGACCAGGTGCCGTAAG,Start=132,End=150,#Primer3|Sequence=GCGATCCTAGGGCGATCA,Start=1,End=18,	GGGGACCAGGTGCCGTAAGACACCATTAATTTGATCAGTCCAAAAACTCTATTATTACTAACTAAAGTTCCCTTTTTTTTTTTTTTTTTTTTTTTTTTCCTTATCTCCTTTATCTTTCAGTCCAGTTGTTCAGCGATCCTAGGGCGATCA
466	466	1.8819	SetName|SetName=duplicate barcodes hubs pos neg#Context|Name=context_canon_term_neg_YER013W#Barcode|Sequence=CTAGTATCCTC,Start=19,End=29,#Primer5|Sequence=GGGGACCAGGTGCCGTAAG,Start=132,End=150,#Primer3|Sequence=GCGATCCTAGGGCGATCA,Start=1,End=18,	GGGGACCAGGTGCCGTAAGCATTGTTAGCTTTTTATGCATTATAATTATCGAGTTTTATAGACCTATATTTAATTTTTTAACAACTTTATCTCTCTTGAGAATTTTTACATGAAAAAAATCCTAGTATCCTCGCGATCCTAGGGCGATCA
467	467	2.1067	SetName|SetName=duplicate barcodes hubs pos neg#Context|Name=context_canon_term_neg_YFL054C#Barcode|Sequence=TGCACTTCGGG,Start=19,End=29,#Primer5|Sequence=GGGGACCAGGTGCCGTAAG,Start=132,End=150,#Primer3|Sequence=GCGATCCTAGGGCGATCA,Start=1,End=18,	GGGGACCAGGTGCCGTAAGTTAATATTTTCAATTTTTTACGATTTATAACCTAATTATTAATTTCACGAACTTATTATTTGACGACATACTACATCCGGGAGCCGTGACTTTGTTACCATCTGCACTTCGGGGCGATCCTAGGGCGATCA
468	468	4.365	SetName|SetName=duplicate barcodes hubs pos neg#Context|Name=context_canon_term_neg_YGR126W#Barcode|Sequence=AAAGTACTGTA,Start=19,End=29,#Primer5|Sequence=GGGGACCAGGTGCCGTAAG,Start=132,End=150,#Primer3|Sequence=GCGATCCTAGGGCGATCA,Start=1,End=18,	GGGGACCAGGTGCCGTAAGGTGGCATAGCAACATTTAGTTCGCAATGCGTTTACTTCAGAATCATTCTTTTTTTTTTTTTTTTTTTTTTTTTGCCTCACATTATATTCTTGGCATCTGCCTAAAGTACTGTAGCGATCCTAGGGCGATCA
469	469	2.2029	SetName|SetName=duplicate barcodes hubs pos neg#Context|Name=context_canon_term_neg_YGL194C#Barcode|Sequence=GCAATGACCTT,Start=19,End=29,#Primer5|Sequence=GGGGACCAGGTGCCGTAAG,Start=132,End=150,#Primer3|Sequence=GCGATCCTAGGGCGATCA,Start=1,End=18,	GGGGACCAGGTGCCGTAAGTTTAAGAGTTTGCTATTCGGTTAATCTCCCGTTTTTTTTTTTTTTTTTTTTTTTATTTTCCTTTTTTTTTTTTTAATGTTTTTAGCATATTATGTAGAGTGTGCAATGACCTTGCGATCCTAGGGCGATCA
470	470	0.6553	SetName|SetName=duplicate barcodes hubs pos neg#Context|Name=context_canon_term_neg_YHL030W_A#Barcode|Sequence=ATGTTACGAAT,Start=19,End=29,#Primer5|Sequence=GGGGACCAGGTGCCGTAAG,Start=132,End=150,#Primer3|Sequence=GCGATCCTAGGGCGATCA,Start=1,End=18,	GGGGACCAGGTGCCGTAAGTTTATTTTTTCCTTGTCTTTTTATCTCTTTTTTTTTGTTTTTCGTTCTCTTTATTTTCAACAACGCCTAGAAAATTTGGTTACCAACCACACTATTGAACAAATGTTACGAATGCGATCCTAGGGCGATCA
471	471	0.665	SetName|SetName=duplicate barcodes hubs pos neg#Context|Name=context_canon_term_neg_YIL054W#Barcode|Sequence=GAACTGCCTCT,Start=19,End=29,#Primer5|Sequence=GGGGACCAGGTGCCGTAAG,Start=132,End=150,#Primer3|Sequence=GCGATCCTAGGGCGATCA,Start=1,End=18,	GGGGACCAGGTGCCGTAAGTGATGTGTGAGTTCCTCTTTTCTTTTTTTCTTTTCTTTTTTCCTTTTTTTTTCTTTTCTTACTCTGTTAATCACTTTCTTTCCTTTTTGTTCATATTGTCGTGAACTGCCTCTGCGATCCTAGGGCGATCA
472	472	0.4968	SetName|SetName=duplicate barcodes hubs pos neg#Context|Name=context_canon_term_neg_YIL084C#Barcode|Sequence=GTGCACGCAAC,Start=19,End=29,#Primer5|Sequence=GGGGACCAGGTGCCGTAAG,Start=132,End=150,#Primer3|Sequence=GCGATCCTAGGGCGATCA,Start=1,End=18,	GGGGACCAGGTGCCGTAAGTTTATTTTATGCTGCAAACCTTCCACTTTAACTTTGTATTATATTACATTAGATGGTTATATTTCAATGTGAGCTCTTTTTGTTTTTGCTTTCTTTTCTCGGGTGCACGCAACGCGATCCTAGGGCGATCA
473	473	0.4339	SetName|SetName=duplicate barcodes hubs pos neg#Context|Name=context_canon_term_neg_YIL105C#Barcode|Sequence=CTAATCGCAGA,Start=19,End=29,#Primer5|Sequence=GGGGACCAGGTGCCGTAAG,Start=132,End=150,#Primer3|Sequence=GCGATCCTAGGGCGATCA,Start=1,End=18,	GGGGACCAGGTGCCGTAAGATACAAGTATAGTAAACTAGAATGTTTTTATTTCCTTCCATCCATATGTTATATTAATATGTTTCCGTATTTTTGTTTTTGTGTCCCATGCATGGAAGAATACTAATCGCAGAGCGATCCTAGGGCGATCA
474	474	3.0918	SetName|SetName=duplicate barcodes hubs pos neg#Context|Name=context_canon_term_neg_YKL143W#Barcode|Sequence=GACCCGAAATC,Start=19,End=29,#Primer5|Sequence=GGGGACCAGGTGCCGTAAG,Start=132,End=150,#Primer3|Sequence=GCGATCCTAGGGCGATCA,Start=1,End=18,	GGGGACCAGGTGCCGTAAGAGGAGTAGAATGAGATGAGAAAGCACCTACATTACAAGTACTGTGTAGACATGTATACTTAGCCTAGAATGCATTGATGCTAAAATACATCCTGCCCACCGGGACCCGAAATCGCGATCCTAGGGCGATCA
475	475	3.9419	SetName|SetName=duplicate barcodes hubs pos neg#Context|Name=context_canon_term_neg_YLR450W#Barcode|Sequence=TCAAGGTCCTG,Start=19,End=29,#Primer5|Sequence=GGGGACCAGGTGCCGTAAG,Start=132,End=150,#Primer3|Sequence=GCGATCCTAGGGCGATCA,Start=1,End=18,	GGGGACCAGGTGCCGTAAGCTCTTGTAGTTTACATGGTGATACTTTATATCTTTGTATTGTCTAGCTATTCTAAATCATCTGCATGTAATAAGAAGTTGATCAAAATGACTCGCTGCGTAATCAAGGTCCTGGCGATCCTAGGGCGATCA
476	476	3.7373	SetName|SetName=duplicate barcodes hubs pos neg#Context|Name=context_canon_term_neg_YLR277C#Barcode|Sequence=ACTGAGTTGTT,Start=19,End=29,#Primer5|Sequence=GGGGACCAGGTGCCGTAAG,Start=132,End=150,#Primer3|Sequence=GCGATCCTAGGGCGATCA,Start=1,End=18,	GGGGACCAGGTGCCGTAAGAAACAGTTACGCATACTAAGTAGACTACTTTATAGAAGTAATACCAAACCAAAATCTGGTTAGAACTGCCTTTTATTGTTTACCTTAATCACTCTTTACGTAACTGAGTTGTTGCGATCCTAGGGCGATCA
477	477	0.3623	SetName|SetName=duplicate barcodes hubs pos neg#Context|Name=context_canon_term_neg_YLR055C#Barcode|Sequence=CAGTAGCCCAA,Start=19,End=29,#Primer5|Sequence=GGGGACCAGGTGCCGTAAG,Start=132,End=150,#Primer3|Sequence=GCGATCCTAGGGCGATCA,Start=1,End=18,	GGGGACCAGGTGCCGTAAGTGAGTTGTAATAATAATCATAACCATAATCATAATCATAATTACTCCGCGCGCCGTTTATTTTTTTTTTTTTTTTTTCAGGGCCACTGATCCCTTCATTTTGCAGTAGCCCAAGCGATCCTAGGGCGATCA
478	478	0.7439	SetName|SetName=duplicate barcodes hubs pos neg#Context|Name=context_canon_term_neg_YLL013C#Barcode|Sequence=CCCAAAGCTGT,Start=19,End=29,#Primer5|Sequence=GGGGACCAGGTGCCGTAAG,Start=132,End=150,#Primer3|Sequence=GCGATCCTAGGGCGATCA,Start=1,End=18,	GGGGACCAGGTGCCGTAAGTTAGTGTTATCATCGTTCTCCTTTCACTTTTTACTATTTTTTTTTTTTTTTTTTTTTTTTTTTTTTCCTCCATTTGTCTTTCACTTACTCTATTTTATTTTGCCCAAAGCTGTGCGATCCTAGGGCGATCA
479	479	0.6489	SetName|SetName=duplicate barcodes hubs pos neg#Context|Name=context_canon_term_neg_YLL019C#Barcode|Sequence=ACGCGGCATTC,Start=19,End=29,#Primer5|Sequence=GGGGACCAGGTGCCGTAAG,Start=132,End=150,#Primer3|Sequence=GCGATCCTAGGGCGATCA,Start=1,End=18,	GGGGACCAGGTGCCGTAAGTGGGTGTTCTCGTTCTACTTTTCTCTTCTTTTTTTCACATCTTTTACTAGTTCCGTTTTTTTTTTTTTTAACTCTTCTTTTTCATTTTCCGGTTTTTAATAAACGCGGCATTCGCGATCCTAGGGCGATCA
480	480	3.0385	SetName|SetName=duplicate barcodes hubs pos neg#Context|Name=context_canon_term_neg_YMR323W#Barcode|Sequence=TGTAACTTTGA,Start=19,End=29,#Primer5|Sequence=GGGGACCAGGTGCCGTAAG,Start=132,End=150,#Primer3|Sequence=GCGATCCTAGGGCGATCA,Start=1,End=18,	GGGGACCAGGTGCCGTAAGAGGATTGTCTTGTTTCCTTTTTTTTTTTTTTGTTTTTTTATGACTAAATAAAGTAAATCATATGAGGTTTTATTTTTTATTTCGTTGATTTGGGTTACAGTATGTAACTTTGAGCGATCCTAGGGCGATCA
481	481	0.3167	SetName|SetName=duplicate barcodes hubs pos neg#Context|Name=context_canon_term_neg_YNL086W#Barcode|Sequence=ACCGTGCAAGG,Start=19,End=29,#Primer5|Sequence=GGGGACCAGGTGCCGTAAG,Start=132,End=150,#Primer3|Sequence=GCGATCCTAGGGCGATCA,Start=1,End=18,	GGGGACCAGGTGCCGTAAGGTAAACATACACATGTATAGCATAATCTTCGATTCCTTTTACCCATTCGTAGATGGCATCGACAGTGTACTTATAATACTACCGTGAGAAACGATATTAAGAACCGTGCAAGGGCGATCCTAGGGCGATCA
482	482	2.3651	SetName|SetName=duplicate barcodes hubs pos neg#Context|Name=context_canon_term_neg_YNR041C#Barcode|Sequence=AGTGGTTACAT,Start=19,End=29,#Primer5|Sequence=GGGGACCAGGTGCCGTAAG,Start=132,End=150,#Primer3|Sequence=GCGATCCTAGGGCGATCA,Start=1,End=18,	GGGGACCAGGTGCCGTAAGATATAGCGTGCATATACAAGTGTTTAATTGTTCTTTTATTCGATTATTATTTACATGCATTCTTACGTAGATGTCCGTACCTATTTGGGCTTCACGATATTCAGTGGTTACATGCGATCCTAGGGCGATCA
483	483	1.5547	SetName|SetName=duplicate barcodes hubs pos neg#Context|Name=context_canon_term_neg_YOR390W#Barcode|Sequence=TCAACGCTTGG,Start=19,End=29,#Primer5|Sequence=GGGGACCAGGTGCCGTAAG,Start=132,End=150,#Primer3|Sequence=GCGATCCTAGGGCGATCA,Start=1,End=18,	GGGGACCAGGTGCCGTAAGGATCTTTTCTTTATACTTTTCCCTGCATAATCATCCCACTTTTTTTTTTTTTTTTTTTAATTCATTTTCAAGATTTTAGACGTTGTATAATACATTTTTACCTCAACGCTTGGGCGATCCTAGGGCGATCA
484	484	4.304	SetName|SetName=duplicate barcodes hubs pos neg#Context|Name=context_canon_term_neg_YOR393W#Barcode|Sequence=TTCTGAAGAGT,Start=19,End=29,#Primer5|Sequence=GGGGACCAGGTGCCGTAAG,Start=132,End=150,#Primer3|Sequence=GCGATCCTAGGGCGATCA,Start=1,End=18,	GGGGACCAGGTGCCGTAAGAGGATTGTCTTGTTTCCTTTTTTTTTTTTTTTTTTTTGTTTTTTTATGACTAAATAAAGTAAATCATATGAGGTTTTATTTTTTATTTCGTTGATTTGGGTTTTCTGAAGAGTGCGATCCTAGGGCGATCA
485	485	2.465	SetName|SetName=duplicate barcodes hubs pos neg#Context|Name=context_canon_term_neg_YOL124C#Barcode|Sequence=CTTGGAGAGTC,Start=19,End=29,#Primer5|Sequence=GGGGACCAGGTGCCGTAAG,Start=132,End=150,#Primer3|Sequence=GCGATCCTAGGGCGATCA,Start=1,End=18,	GGGGACCAGGTGCCGTAAGAATGATGCATAAGCCCTTTGTAATTTTAAGATATATTTACTTACTCTTTCTCTTAAAGAAAAAAAAAAAAAAAGAAGAACAATTTATCTATACCTATATTTACTTGGAGAGTCGCGATCCTAGGGCGATCA
486	486	3.5452	SetName|SetName=duplicate barcodes hubs pos neg#Context|Name=context_canon_term_neg_YPR172W#Barcode|Sequence=GGACAGTGCAC,Start=19,End=29,#Primer5|Sequence=GGGGACCAGGTGCCGTAAG,Start=132,End=150,#Primer3|Sequence=GCGATCCTAGGGCGATCA,Start=1,End=18,	GGGGACCAGGTGCCGTAAGCTGTCCTCTGCTTTTCTTTATCTATTTTGCATACGATTCTGTATTTAATTATTCTGTTTTTTTTTTTTTTTTATTTTTTATTTTCATGTACACAAGAAATCTGGACAGTGCACGCGATCCTAGGGCGATCA
487	487	0.3079	SetName|SetName=duplicate barcodes hubs pos neg#Context|Name=context_canon_term_neg_YPR175W#Barcode|Sequence=TTAACATATCG,Start=19,End=29,#Primer5|Sequence=GGGGACCAGGTGCCGTAAG,Start=132,End=150,#Primer3|Sequence=GCGATCCTAGGGCGATCA,Start=1,End=18,	GGGGACCAGGTGCCGTAAGATAATGCATCAAAATAAGAACACTTAAACAAGCACGGTAGTGTTGGTACTCTGCCATCTATTTGTATGGATACTTTTTGAATTTTGATGTAACGGATTTCGGTTAACATATCGGCGATCCTAGGGCGATCA
488	488	0.3259	SetName|SetName=duplicate barcodes hubs pos neg#Context|Name=context_canon_term_neg_YPR170C#Barcode|Sequence=GGCCCGTACTC,Start=19,End=29,#Primer5|Sequence=GGGGACCAGGTGCCGTAAG,Start=132,End=150,#Primer3|Sequence=GCGATCCTAGGGCGATCA,Start=1,End=18,	GGGGACCAGGTGCCGTAAGTATTGTGGTGTTCTTTTCGATATTCTCAGATACCGTTTATTGTGCGCCATACCGATGGATGCAGAAATATCATTTAAATAGTTAAGCCAGGAAGTGGCTGAGGGCCCGTACTCGCGATCCTAGGGCGATCA
489	489	0.4794	SetName|SetName=duplicate barcodes hubs pos neg#Context|Name=context_canon_term_neg_YPR120C#Barcode|Sequence=TTGTTCAGGCC,Start=19,End=29,#Primer5|Sequence=GGGGACCAGGTGCCGTAAG,Start=132,End=150,#Primer3|Sequence=GCGATCCTAGGGCGATCA,Start=1,End=18,	GGGGACCAGGTGCCGTAAGATTAGTACTAGTAATGCTCATGAATTCGCATACTCTTTACATTTTCTTTTCTTTTTGCTGAACTAAAAGGAAAAAATTTTTTGCATCTATCTATCTATCTATTTGTTCAGGCCGCGATCCTAGGGCGATCA
490	490	4.581	SetName|SetName=duplicate barcodes hubs pos neg#Context|Name=context_canon_term_neg_YPL281C#Barcode|Sequence=CCCTTTCACAC,Start=19,End=29,#Primer5|Sequence=GGGGACCAGGTGCCGTAAG,Start=132,End=150,#Primer3|Sequence=GCGATCCTAGGGCGATCA,Start=1,End=18,	GGGGACCAGGTGCCGTAAGAGGATTGTCTTGTTTCCTTTTTTTTTTTTTTTTTTTTTGTTTTTTTATGACTAAATAAAGTAAATCATATGAGGTTTTATTTTTTATTTCGTTGATTTGGGTCCCTTTCACACGCGATCCTAGGGCGATCA
491	491	4.9899	SetName|SetName=duplicate barcodes hubs pos neg#Context|Name=context_canon_term_pos_YAL016W#Barcode|Sequence=ATCACTCACTG,Start=19,End=29,#Primer5|Sequence=GGGGACCAGGTGCCGTAAG,Start=132,End=150,#Primer3|Sequence=GCGATCCTAGGGCGATCA,Start=1,End=18,	GGGGACCAGGTGCCGTAAGTACTAGTTCAAATATATACATACATACACATATGTACACTTGAATGAATAAAAAGTATACATATTAACAACTAGGCCTGCTTTCTTTTCTTTTCTTTTTTTTATCACTCACTGGCGATCCTAGGGCGATCA
492	492	3.5483	SetName|SetName=duplicate barcodes hubs pos neg#Context|Name=context_canon_term_pos_YAR007C#Barcode|Sequence=CACCTTTAAAA,Start=19,End=29,#Primer5|Sequence=GGGGACCAGGTGCCGTAAG,Start=132,End=150,#Primer3|Sequence=GCGATCCTAGGGCGATCA,Start=1,End=18,	GGGGACCAGGTGCCGTAAGTGTATCAAATAATCAAGTACTATTTAATCTATGTAACATATGAGAAATGTAAAAAAAAAACTTCTATTTCGTCAAGTTTTTGAAGGGCGGTTCAGCATCTCTCACCTTTAAAAGCGATCCTAGGGCGATCA
493	493	4.2065	SetName|SetName=duplicate barcodes hubs pos neg#Context|Name=context_canon_term_pos_YAL044C#Barcode|Sequence=TTGTCGCATAC,Start=19,End=29,#Primer5|Sequence=GGGGACCAGGTGCCGTAAG,Start=132,End=150,#Primer3|Sequence=GCGATCCTAGGGCGATCA,Start=1,End=18,	GGGGACCAGGTGCCGTAAGACAAAGCTTATACGTACGTAAAGTAATTTCATATATATGTATATATATGTAGGGGAAATAAAACAATAAACTCAACGTGTACACTTATGCTTATGCATTCTATTGTCGCATACGCGATCCTAGGGCGATCA
494	494	3.034	SetName|SetName=duplicate barcodes hubs pos neg#Context|Name=context_canon_term_pos_YBR252W#Barcode|Sequence=ACGACAGTAAT,Start=19,End=29,#Primer5|Sequence=GGGGACCAGGTGCCGTAAG,Start=132,End=150,#Primer3|Sequence=GCGATCCTAGGGCGATCA,Start=1,End=18,	GGGGACCAGGTGCCGTAAGCTTAGTGTATATACTTTGGCACACTTGTATAATGTATAATAAAATCAGGATAAATCCAGTGTGACCCGGACTGAATTACTGAAACTTTGAAGTGTTAAGGAAACGACAGTAATGCGATCCTAGGGCGATCA
495	495	4.5826	SetName|SetName=duplicate barcodes hubs pos neg#Context|Name=context_canon_term_pos_YDR394W#Barcode|Sequence=TGTTGACGATT,Start=19,End=29,#Primer5|Sequence=GGGGACCAGGTGCCGTAAG,Start=132,End=150,#Primer3|Sequence=GCGATCCTAGGGCGATCA,Start=1,End=18,	GGGGACCAGGTGCCGTAAGTTACCATATATGCTTCAACGTAGGTCTACATAAAGTATTACGTACATTTCTATCTAGACAACACTAAATGAAATAAATACAGACGCCACTTTTTTATCACGTTGTTGACGATTGCGATCCTAGGGCGATCA
496	496	2.8892	SetName|SetName=duplicate barcodes hubs pos neg#Context|Name=context_canon_term_pos_YDR375C#Barcode|Sequence=CCCTCACGACT,Start=19,End=29,#Primer5|Sequence=GGGGACCAGGTGCCGTAAG,Start=132,End=150,#Primer3|Sequence=GCGATCCTAGGGCGATCA,Start=1,End=18,	GGGGACCAGGTGCCGTAAGGTGCTAAGTGGCGCCTTACTACATAACTTGTATATAATAAAAATTCAGAAGATGCTTTAACTTTTTCTCGTTAATAAGACCGAGTTATTTGCTATTACGAACCCCTCACGACTGCGATCCTAGGGCGATCA
497	497	3.1644	SetName|SetName=duplicate barcodes hubs pos neg#Context|Name=context_canon_term_pos_YDR050C#Barcode|Sequence=CAAGATCCCGC,Start=19,End=29,#Primer5|Sequence=GGGGACCAGGTGCCGTAAG,Start=132,End=150,#Primer3|Sequence=GCGATCCTAGGGCGATCA,Start=1,End=18,	GGGGACCAGGTGCCGTAAGGATTAATATAATTATATAAAAATATTATCTTCTTTTCTTTATATCTAGTGTTATGTAAAATAAATTGATGACTACGGAAAGCTTTTTTATATTGTTTCTTTTCAAGATCCCGCGCGATCCTAGGGCGATCA
498	498	2.1327	SetName|SetName=duplicate barcodes hubs pos neg#Context|Name=context_canon_term_pos_YDL044C#Barcode|Sequence=CTGCAGACGTA,Start=19,End=29,#Primer5|Sequence=GGGGACCAGGTGCCGTAAG,Start=132,End=150,#Primer3|Sequence=GCGATCCTAGGGCGATCA,Start=1,End=18,	GGGGACCAGGTGCCGTAAGAAAATTATTCAAACCTTGTAAATAGTGTTATATATATGTGTTAGACTTAAAAGCGCTAATAAACGTTCCTGCTCGCATTTAACTTCTGTTCCAATTTTCCTACTGCAGACGTAGCGATCCTAGGGCGATCA
499	499	1.2337	SetName|SetName=duplicate barcodes hubs pos neg#Context|Name=context_canon_term_pos_YDL227C#Barcode|Sequence=CTGTAATCACT,Start=19,End=29,#Primer5|Sequence=GGGGACCAGGTGCCGTAAG,Start=132,End=150,#Primer3|Sequence=GCGATCCTAGGGCGATCA,Start=1,End=18,	GGGGACCAGGTGCCGTAAGAATGTGTATATTAGTTTAAAAAGTTGTATGTAATAAAAGTAAAATTTAATATTTTGGATGAAAAAAACCATTTTTAGACTTTTTCTTAACTAGAATGCTGGACTGTAATCACTGCGATCCTAGGGCGATCA
500	500	4.6094	SetName|SetName=duplicate barcodes hubs pos neg#Context|Name=context_canon_term_pos_YEL059C_A#Barcode|Sequence=TATCCCGTGGC,Start=19,End=29,#Primer5|Sequence=GGGGACCAGGTGCCGTAAG,Start=132,End=150,#Primer3|Sequence=GCGATCCTAGGGCGATCA,Start=1,End=18,	GGGGACCAGGTGCCGTAAGAAATTACATATACTCTATATAGCACAGTAGTGTGATAAATAAAAAATTTTGCCAAGACTTTTTTAAACTGCACCCGACAGATCAGGTCTGTGCCTACTATGCTATCCCGTGGCGCGATCCTAGGGCGATCA
501	501	4.8389	SetName|SetName=duplicate barcodes hubs pos neg#Context|Name=context_canon_term_pos_YFL009W#Barcode|Sequence=GGTTGCGGCTA,Start=19,End=29,#Primer5|Sequence=GGGGACCAGGTGCCGTAAG,Start=132,End=150,#Primer3|Sequence=GCGATCCTAGGGCGATCA,Start=1,End=18,	GGGGACCAGGTGCCGTAAGCCTTTCCCAGAGAATAAGCATTGACTCATACTTAGATAATATAGCTTAATAAGTAGTTATATAATCAGTAAAAAAGTACAATAACAACTTCGTACATTTTATGGTTGCGGCTAGCGATCCTAGGGCGATCA
502	502	3.7894	SetName|SetName=duplicate barcodes hubs pos neg#Context|Name=context_canon_term_pos_YFR039C#Barcode|Sequence=CGGCGAACTGG,Start=19,End=29,#Primer5|Sequence=GGGGACCAGGTGCCGTAAG,Start=132,End=150,#Primer3|Sequence=GCGATCCTAGGGCGATCA,Start=1,End=18,	GGGGACCAGGTGCCGTAAGTCAATATATAGGTATGTATATGTACATATATACAAACATTTAATAAAAACAATATTGTATGATAACCAAGTTAAAGACCGGAGGTTGTTTCAAATAGCTTGACGGCGAACTGGGCGATCCTAGGGCGATCA
503	503	3.3947	SetName|SetName=duplicate barcodes hubs pos neg#Context|Name=context_canon_term_pos_YGR166W#Barcode|Sequence=GCGGCACTAGT,Start=19,End=29,#Primer5|Sequence=GGGGACCAGGTGCCGTAAG,Start=132,End=150,#Primer3|Sequence=GCGATCCTAGGGCGATCA,Start=1,End=18,	GGGGACCAGGTGCCGTAAGGCGGAACAAGTATACATTTTATTAACATAGACTACATACTAATCTGTAACATTTCTATAAAAAAGTTATTATCATCACATTACACGATAGAAACACTTCCATGCGGCACTAGTGCGATCCTAGGGCGATCA
504	504	1.9961	SetName|SetName=duplicate barcodes hubs pos neg#Context|Name=context_canon_term_pos_YHR200W#Barcode|Sequence=AAATGGAGCTC,Start=19,End=29,#Primer5|Sequence=GGGGACCAGGTGCCGTAAG,Start=132,End=150,#Primer3|Sequence=GCGATCCTAGGGCGATCA,Start=1,End=18,	GGGGACCAGGTGCCGTAAGTAGTGTACAAAAATATCTATATGGGTCATATATAAACCAAATAAAGCATATATAACATCTCCCTTCACTCTTCCAGGTTTGAGTACGCTTCCTCTAAATAGGAAATGGAGCTCGCGATCCTAGGGCGATCA
505	505	2.67	SetName|SetName=duplicate barcodes hubs pos neg#Context|Name=context_canon_term_pos_YIR021W#Barcode|Sequence=TACATGGATCT,Start=19,End=29,#Primer5|Sequence=GGGGACCAGGTGCCGTAAG,Start=132,End=150,#Primer3|Sequence=GCGATCCTAGGGCGATCA,Start=1,End=18,	GGGGACCAGGTGCCGTAAGTCCTCTTATATAGCATGTAAATAGAAAGTACGTAAAAAAAAGCTACTATTGACTTTATTCTCCGTGAGGGCGGTTCTTTCTGTAGCTGTTGGTTTTTTCCAGTACATGGATCTGCGATCCTAGGGCGATCA
506	506	3.1702	SetName|SetName=duplicate barcodes hubs pos neg#Context|Name=context_canon_term_pos_YIR035C#Barcode|Sequence=GACTATGGATA,Start=19,End=29,#Primer5|Sequence=GGGGACCAGGTGCCGTAAG,Start=132,End=150,#Primer3|Sequence=GCGATCCTAGGGCGATCA,Start=1,End=18,	GGGGACCAGGTGCCGTAAGGGATAGCAGGTACATATAAATTGTTACATACTAAGTCGATGAGTCAAAAAAGACTCTTATACATTTATACATTTTGCATTATTATTTTTTTTTTCCAGCGGAGACTATGGATAGCGATCCTAGGGCGATCA
507	507	3.4991	SetName|SetName=duplicate barcodes hubs pos neg#Context|Name=context_canon_term_pos_YIL115C#Barcode|Sequence=CTTTCTTAACA,Start=19,End=29,#Primer5|Sequence=GGGGACCAGGTGCCGTAAG,Start=132,End=150,#Primer3|Sequence=GCGATCCTAGGGCGATCA,Start=1,End=18,	GGGGACCAGGTGCCGTAAGTGATATTTAGCTATATGTACGTTGTTAGTGCCGTTAATAATAAATTCATCCTCTATCATAGAAACAGGGCATGAGAAACGAAGAAAAATTGATATTGTAACACTTTCTTAACAGCGATCCTAGGGCGATCA
508	508	4.4929	SetName|SetName=duplicate barcodes hubs pos neg#Context|Name=context_canon_term_pos_YJL050W#Barcode|Sequence=CCATATTCAGC,Start=19,End=29,#Primer5|Sequence=GGGGACCAGGTGCCGTAAG,Start=132,End=150,#Primer3|Sequence=GCGATCCTAGGGCGATCA,Start=1,End=18,	GGGGACCAGGTGCCGTAAGTTAATCACACACAATTATGTATTTTTATTGGTATATATAATAAACAAATAGATTTCATCAACATTTATTATATAATAACATTTTTGTTTGGGCAAGCACACTCCATATTCAGCGCGATCCTAGGGCGATCA
509	509	3.7654	SetName|SetName=duplicate barcodes hubs pos neg#Context|Name=context_canon_term_pos_YJR100C#Barcode|Sequence=CAACAGGCTGC,Start=19,End=29,#Primer5|Sequence=GGGGACCAGGTGCCGTAAG,Start=132,End=150,#Primer3|Sequence=GCGATCCTAGGGCGATCA,Start=1,End=18,	GGGGACCAGGTGCCGTAAGGTGAATTATATATTTAAAAGAATTCTGTAAATACATATTTGACTACGCAGTAATAAAACAATTATTATTCCCAATTAGGGCCCAATCCTAGCATAGCAAAGTCAACAGGCTGCGCGATCCTAGGGCGATCA
510	510	2.6329	SetName|SetName=duplicate barcodes hubs pos neg#Context|Name=context_canon_term_pos_YJL204C#Barcode|Sequence=AACCTGTCACG,Start=19,End=29,#Primer5|Sequence=GGGGACCAGGTGCCGTAAG,Start=132,End=150,#Primer3|Sequence=GCGATCCTAGGGCGATCA,Start=1,End=18,	GGGGACCAGGTGCCGTAAGATTCCTATCAATGATTAATTATATTACTCTATATAGGTATGAAGTGCGGAAATAAAAGACTGTTCACATATTAGATTATTCAAGATTACGCGGGCTCTATTTAACCTGTCACGGCGATCCTAGGGCGATCA
511	511	3.012	SetName|SetName=duplicate barcodes hubs pos neg#Context|Name=context_canon_term_pos_YLR064W#Barcode|Sequence=ATAGGGTACCG,Start=19,End=29,#Primer5|Sequence=GGGGACCAGGTGCCGTAAG,Start=132,End=150,#Primer3|Sequence=GCGATCCTAGGGCGATCA,Start=1,End=18,	GGGGACCAGGTGCCGTAAGCATGCTCATTTTAAGTATATCTAAATATTATTTTGTATATACTCACACTCCTCTATAGAAAGCAAAAAATTTCAAAAACGTTTGAAAAGCTTTGTTTAACGAATAGGGTACCGGCGATCCTAGGGCGATCA
512	512	2.5051	SetName|SetName=duplicate barcodes hubs pos neg#Context|Name=context_canon_term_pos_YLR298C#Barcode|Sequence=ACAGGAGGATT,Start=19,End=29,#Primer5|Sequence=GGGGACCAGGTGCCGTAAG,Start=132,End=150,#Primer3|Sequence=GCGATCCTAGGGCGATCA,Start=1,End=18,	GGGGACCAGGTGCCGTAAGCGCTATCAGATTAGATTATTAAATATTATATGTAGACTATATTTTGCCAAAAAAAACAATAGAGATATCAACAACGAATGAAAATGGTATGATGAGAATAAAACAGGAGGATTGCGATCCTAGGGCGATCA
513	513	5.0328	SetName|SetName=duplicate barcodes hubs pos neg#Context|Name=context_canon_term_pos_YLR272C#Barcode|Sequence=TTGACACAGTC,Start=19,End=29,#Primer5|Sequence=GGGGACCAGGTGCCGTAAG,Start=132,End=150,#Primer3|Sequence=GCGATCCTAGGGCGATCA,Start=1,End=18,	GGGGACCAGGTGCCGTAAGTCGAACTGACGTTTACCCGTTTCTTCCGTTTTATATTATATGTTATTATATAAATAAAAGCTGTTCATTTCTTTCTTCTTGAAATATGACTTTACCTATCTCTTGACACAGTCGCGATCCTAGGGCGATCA
514	514	4.2725	SetName|SetName=duplicate barcodes hubs pos neg#Context|Name=context_canon_term_pos_YNR049C#Barcode|Sequence=AGAAAGTGCAG,Start=19,End=29,#Primer5|Sequence=GGGGACCAGGTGCCGTAAG,Start=132,End=150,#Primer3|Sequence=GCGATCCTAGGGCGATCA,Start=1,End=18,	GGGGACCAGGTGCCGTAAGATAGCACTATACCTTGCTGAAATAAAGCGAAAAGAACATTTAATGAATATATAGGTATCGTATATGTACTGAATAAAGTGTTTGATACAGAATGCAAGGAGAAGAAAGTGCAGGCGATCCTAGGGCGATCA
515	515	3.2142	SetName|SetName=duplicate barcodes hubs pos neg#Context|Name=context_canon_term_pos_YNL011C#Barcode|Sequence=ATAGAAGGACG,Start=19,End=29,#Primer5|Sequence=GGGGACCAGGTGCCGTAAG,Start=132,End=150,#Primer3|Sequence=GCGATCCTAGGGCGATCA,Start=1,End=18,	GGGGACCAGGTGCCGTAAGTGCAACTATGTCGCTCATTAACGGTTATTATAGTGAAGACTACATAATAAAGACATAGATAATAAAAAAGAATCGCGTTTGAACCATGTTTTATTTAACCATATAGAAGGACGGCGATCCTAGGGCGATCA
516	516	1.7897	SetName|SetName=duplicate barcodes hubs pos neg#Context|Name=context_canon_term_pos_YNL231C#Barcode|Sequence=GATTTCACAGA,Start=19,End=29,#Primer5|Sequence=GGGGACCAGGTGCCGTAAG,Start=132,End=150,#Primer3|Sequence=GCGATCCTAGGGCGATCA,Start=1,End=18,	GGGGACCAGGTGCCGTAAGAGGCAAATTTAGATAGATAATGATAATGCACTATAATATATAATAAATAAAAGAGAATAAAAAGTTTAATCACGTTCCCGCTTCTTTTTCCTAACCATCAAAGATTTCACAGAGCGATCCTAGGGCGATCA
517	517	1.6068	SetName|SetName=duplicate barcodes hubs pos neg#Context|Name=context_canon_term_pos_YOL009C#Barcode|Sequence=CGTTAAACTGT,Start=19,End=29,#Primer5|Sequence=GGGGACCAGGTGCCGTAAG,Start=132,End=150,#Primer3|Sequence=GCGATCCTAGGGCGATCA,Start=1,End=18,	GGGGACCAGGTGCCGTAAGTTTAACAAAGATAGTTTGAAAATAGTGTCTACATAAAAAAACAAACATTTTTGAGCTGGAAAATTATATTTTGTCATGAAGTAATCTATTCTTAACGCGCTTCGTTAAACTGTGCGATCCTAGGGCGATCA
518	518	3.6353	SetName|SetName=duplicate barcodes hubs pos neg#Context|Name=context_canon_term_pos_YOL073C#Barcode|Sequence=AGAGCATGAGC,Start=19,End=29,#Primer5|Sequence=GGGGACCAGGTGCCGTAAG,Start=132,End=150,#Primer3|Sequence=GCGATCCTAGGGCGATCA,Start=1,End=18,	GGGGACCAGGTGCCGTAAGTTTATATCAGCATATACCTACATAAACAAATAAACATAGCAACGGTTTAGCAACATCGTTTACAGCCATGTGAGGCAGTTACTTCTATCATATGTCTGGCTTAGAGCATGAGCGCGATCCTAGGGCGATCA
519	519	3.8111	SetName|SetName=duplicate barcodes hubs pos neg#Context|Name=context_canon_term_pos_YPL006W#Barcode|Sequence=ATTCAGAGCTG,Start=19,End=29,#Primer5|Sequence=GGGGACCAGGTGCCGTAAG,Start=132,End=150,#Primer3|Sequence=GCGATCCTAGGGCGATCA,Start=1,End=18,	GGGGACCAGGTGCCGTAAGCCATAGCAGATTATACTATATTTTACGTAGTGAAAAAATAGGTAAAAATTCGTTAATTATTCTGATGCCACACCAGAAAATCTGTGGGAAAATTTTTCGAGTATTCAGAGCTGGCGATCCTAGGGCGATCA
520	520	0.6078	SetName|SetName=duplicate barcodes hubs pos neg#Context|Name=context_canon_term_neg_YBL097W#Barcode|Sequence=CGTCTCTAAGT,Start=19,End=29,#Primer5|Sequence=GGGGACCAGGTGCCGTAAG,Start=132,End=150,#Primer3|Sequence=GCGATCCTAGGGCGATCA,Start=1,End=18,	GGGGACCAGGTGCCGTAAGTTGATGATCTTTTTTTTTTTTTTTTTTTTTTTTTTTGTGCTGCAAAGTTTCTTAAAGCCTTCGGGCTTACGAAATCCTTTATCGCCGAAAGGGGACCGCTTCCGTCTCTAAGTGCGATCCTAGGGCGATCA
521	521	5.0468	SetName|SetName=duplicate barcodes hubs pos neg#Context|Name=context_canon_term_neg_YBL075C#Barcode|Sequence=CGGTTGTGGAC,Start=19,End=29,#Primer5|Sequence=GGGGACCAGGTGCCGTAAG,Start=132,End=150,#Primer3|Sequence=GCGATCCTAGGGCGATCA,Start=1,End=18,	GGGGACCAGGTGCCGTAAGTTATTCTTCTATAGTGTTCTATTTAGCTACTTTTTATGTTTAACCTTTTATACGATGGCGGGTAATCTATCCATGATGACGAAAAATTTTTTTTTTTTTTGTCGGTTGTGGACGCGATCCTAGGGCGATCA
522	522	3.4253	SetName|SetName=duplicate barcodes hubs pos neg#Context|Name=context_canon_term_neg_YBL088C#Barcode|Sequence=GACTTCTCATG,Start=19,End=29,#Primer5|Sequence=GGGGACCAGGTGCCGTAAG,Start=132,End=150,#Primer3|Sequence=GCGATCCTAGGGCGATCA,Start=1,End=18,	GGGGACCAGGTGCCGTAAGTTGCTATGCAGATGCTTTATACTTCTTTTTTTTGTTTATAGAAATACGAAAAGTAATGTACAAACTCAATGTGATGATGTGCCCAAAAATACAATCGCTGATGACTTCTCATGGCGATCCTAGGGCGATCA
523	523	2.4206	SetName|SetName=duplicate barcodes hubs pos neg#Context|Name=context_canon_term_neg_YCR032W#Barcode|Sequence=AAGACGATCCT,Start=19,End=29,#Primer5|Sequence=GGGGACCAGGTGCCGTAAG,Start=132,End=150,#Primer3|Sequence=GCGATCCTAGGGCGATCA,Start=1,End=18,	GGGGACCAGGTGCCGTAAGGCATCACATCGTAACGCCTTTCTTTAAATGATTCAATTTTTGTAGTTTATATCTTTACTTTTGAAACTGATTTCTCATCCCATCTAGTATTGTAATTGCGTAAAGACGATCCTGCGATCCTAGGGCGATCA
524	524	0.4269	SetName|SetName=duplicate barcodes hubs pos neg#Context|Name=context_canon_term_neg_YDR325W#Barcode|Sequence=AAGTAGTGAAG,Start=19,End=29,#Primer5|Sequence=GGGGACCAGGTGCCGTAAG,Start=132,End=150,#Primer3|Sequence=GCGATCCTAGGGCGATCA,Start=1,End=18,	GGGGACCAGGTGCCGTAAGAATTGATATGCGAGCTCTTCATCTATTTAAGTTGATTTTTTGGTTGTAAACATATTTGTATTTTATTCTTAGGTTTGTTAATTCTTCTACGCTTACCAGATAAAGTAGTGAAGGCGATCCTAGGGCGATCA
525	525	3.4769	SetName|SetName=duplicate barcodes hubs pos neg#Context|Name=context_canon_term_neg_YDR457W#Barcode|Sequence=TGCGTCTACGA,Start=19,End=29,#Primer5|Sequence=GGGGACCAGGTGCCGTAAG,Start=132,End=150,#Primer3|Sequence=GCGATCCTAGGGCGATCA,Start=1,End=18,	GGGGACCAGGTGCCGTAAGTCATTTTTCGTGTAAATTTATAGCGCCATGTAACCAAGTATTTTAGAACGTCTTTTATTTAAACCTTTAACCATACAACACTTGCCCAAGGAAGAGGAACAGTGCGTCTACGAGCGATCCTAGGGCGATCA
526	526	0.3662	SetName|SetName=duplicate barcodes hubs pos neg#Context|Name=context_canon_term_neg_YDL205C#Barcode|Sequence=TAGTAACATAG,Start=19,End=29,#Primer5|Sequence=GGGGACCAGGTGCCGTAAG,Start=132,End=150,#Primer3|Sequence=GCGATCCTAGGGCGATCA,Start=1,End=18,	GGGGACCAGGTGCCGTAAGACACCATTAATTTGATCAGTCCAAAAACTCTATTATTACTAACTAAAGTTCCCTTTTTTTTTTTTTTTTTTTTTTTTTTCCTTATCTCCTTTATCTTTCAGTTAGTAACATAGGCGATCCTAGGGCGATCA
527	527	1.7321	SetName|SetName=duplicate barcodes hubs pos neg#Context|Name=context_canon_term_neg_YER013W#Barcode|Sequence=CTAAGCGGCAT,Start=19,End=29,#Primer5|Sequence=GGGGACCAGGTGCCGTAAG,Start=132,End=150,#Primer3|Sequence=GCGATCCTAGGGCGATCA,Start=1,End=18,	GGGGACCAGGTGCCGTAAGCATTGTTAGCTTTTTATGCATTATAATTATCGAGTTTTATAGACCTATATTTAATTTTTTAACAACTTTATCTCTCTTGAGAATTTTTACATGAAAAAAATCCTAAGCGGCATGCGATCCTAGGGCGATCA
528	528		SetName|SetName=duplicate barcodes hubs pos neg#Context|Name=context_canon_term_neg_YFL054C#Barcode|Sequence=AAGGTTCGCTT,Start=19,End=29,#Primer5|Sequence=GGGGACCAGGTGCCGTAAG,Start=132,End=150,#Primer3|Sequence=GCGATCCTAGGGCGATCA,Start=1,End=18,	GGGGACCAGGTGCCGTAAGTTAATATTTTCAATTTTTTACGATTTATAACCTAATTATTAATTTCACGAACTTATTATTTGACGACATACTACATCCGGGAGCCGTGACTTTGTTACCATCAAGGTTCGCTTGCGATCCTAGGGCGATCA
529	529	0.5392	SetName|SetName=duplicate barcodes hubs pos neg#Context|Name=context_canon_term_neg_YGR126W#Barcode|Sequence=GGAGGTAACCT,Start=19,End=29,#Primer5|Sequence=GGGGACCAGGTGCCGTAAG,Start=132,End=150,#Primer3|Sequence=GCGATCCTAGGGCGATCA,Start=1,End=18,	GGGGACCAGGTGCCGTAAGGTGGCATAGCAACATTTAGTTCGCAATGCGTTTACTTCAGAATCATTCTTTTTTTTTTTTTTTTTTTTTTTTTGCCTCACATTATATTCTTGGCATCTGCCTGGAGGTAACCTGCGATCCTAGGGCGATCA
530	530	2.2051	SetName|SetName=duplicate barcodes hubs pos neg#Context|Name=context_canon_term_neg_YGL194C#Barcode|Sequence=ATTAGAGGACT,Start=19,End=29,#Primer5|Sequence=GGGGACCAGGTGCCGTAAG,Start=132,End=150,#Primer3|Sequence=GCGATCCTAGGGCGATCA,Start=1,End=18,	GGGGACCAGGTGCCGTAAGTTTAAGAGTTTGCTATTCGGTTAATCTCCCGTTTTTTTTTTTTTTTTTTTTTTTATTTTCCTTTTTTTTTTTTTAATGTTTTTAGCATATTATGTAGAGTGTATTAGAGGACTGCGATCCTAGGGCGATCA
531	531		SetName|SetName=duplicate barcodes hubs pos neg#Context|Name=context_canon_term_neg_YHL030W_A#Barcode|Sequence=GCGCCAAATTG,Start=19,End=29,#Primer5|Sequence=GGGGACCAGGTGCCGTAAG,Start=132,End=150,#Primer3|Sequence=GCGATCCTAGGGCGATCA,Start=1,End=18,	GGGGACCAGGTGCCGTAAGTTTATTTTTTCCTTGTCTTTTTATCTCTTTTTTTTTGTTTTTCGTTCTCTTTATTTTCAACAACGCCTAGAAAATTTGGTTACCAACCACACTATTGAACAAGCGCCAAATTGGCGATCCTAGGGCGATCA
532	532	0.6527	SetName|SetName=duplicate barcodes hubs pos neg#Context|Name=context_canon_term_neg_YIL054W#Barcode|Sequence=AACACCTGTTC,Start=19,End=29,#Primer5|Sequence=GGGGACCAGGTGCCGTAAG,Start=132,End=150,#Primer3|Sequence=GCGATCCTAGGGCGATCA,Start=1,End=18,	GGGGACCAGGTGCCGTAAGTGATGTGTGAGTTCCTCTTTTCTTTTTTTCTTTTCTTTTTTCCTTTTTTTTTCTTTTCTTACTCTGTTAATCACTTTCTTTCCTTTTTGTTCATATTGTCGTAACACCTGTTCGCGATCCTAGGGCGATCA
533	533	0.3474	SetName|SetName=duplicate barcodes hubs pos neg#Context|Name=context_canon_term_neg_YIL084C#Barcode|Sequence=CCTATTCACAG,Start=19,End=29,#Primer5|Sequence=GGGGACCAGGTGCCGTAAG,Start=132,End=150,#Primer3|Sequence=GCGATCCTAGGGCGATCA,Start=1,End=18,	GGGGACCAGGTGCCGTAAGTTTATTTTATGCTGCAAACCTTCCACTTTAACTTTGTATTATATTACATTAGATGGTTATATTTCAATGTGAGCTCTTTTTGTTTTTGCTTTCTTTTCTCGGCCTATTCACAGGCGATCCTAGGGCGATCA
534	534	0.4371	SetName|SetName=duplicate barcodes hubs pos neg#Context|Name=context_canon_term_neg_YIL105C#Barcode|Sequence=AACACTTGCCA,Start=19,End=29,#Primer5|Sequence=GGGGACCAGGTGCCGTAAG,Start=132,End=150,#Primer3|Sequence=GCGATCCTAGGGCGATCA,Start=1,End=18,	GGGGACCAGGTGCCGTAAGATACAAGTATAGTAAACTAGAATGTTTTTATTTCCTTCCATCCATATGTTATATTAATATGTTTCCGTATTTTTGTTTTTGTGTCCCATGCATGGAAGAATAAACACTTGCCAGCGATCCTAGGGCGATCA
535	535	2.6111	SetName|SetName=duplicate barcodes hubs pos neg#Context|Name=context_canon_term_neg_YKL143W#Barcode|Sequence=CTGTCCATTGT,Start=19,End=29,#Primer5|Sequence=GGGGACCAGGTGCCGTAAG,Start=132,End=150,#Primer3|Sequence=GCGATCCTAGGGCGATCA,Start=1,End=18,	GGGGACCAGGTGCCGTAAGAGGAGTAGAATGAGATGAGAAAGCACCTACATTACAAGTACTGTGTAGACATGTATACTTAGCCTAGAATGCATTGATGCTAAAATACATCCTGCCCACCGGCTGTCCATTGTGCGATCCTAGGGCGATCA
536	536	4.1343	SetName|SetName=duplicate barcodes hubs pos neg#Context|Name=context_canon_term_neg_YLR450W#Barcode|Sequence=CACCGAACATG,Start=19,End=29,#Primer5|Sequence=GGGGACCAGGTGCCGTAAG,Start=132,End=150,#Primer3|Sequence=GCGATCCTAGGGCGATCA,Start=1,End=18,	GGGGACCAGGTGCCGTAAGCTCTTGTAGTTTACATGGTGATACTTTATATCTTTGTATTGTCTAGCTATTCTAAATCATCTGCATGTAATAAGAAGTTGATCAAAATGACTCGCTGCGTAACACCGAACATGGCGATCCTAGGGCGATCA
537	537	3.8404	SetName|SetName=duplicate barcodes hubs pos neg#Context|Name=context_canon_term_neg_YLR277C#Barcode|Sequence=AAATTGCAAGG,Start=19,End=29,#Primer5|Sequence=GGGGACCAGGTGCCGTAAG,Start=132,End=150,#Primer3|Sequence=GCGATCCTAGGGCGATCA,Start=1,End=18,	GGGGACCAGGTGCCGTAAGAAACAGTTACGCATACTAAGTAGACTACTTTATAGAAGTAATACCAAACCAAAATCTGGTTAGAACTGCCTTTTATTGTTTACCTTAATCACTCTTTACGTAAAATTGCAAGGGCGATCCTAGGGCGATCA
538	538	0.3581	SetName|SetName=duplicate barcodes hubs pos neg#Context|Name=context_canon_term_neg_YLR055C#Barcode|Sequence=CGGGTTGTCCG,Start=19,End=29,#Primer5|Sequence=GGGGACCAGGTGCCGTAAG,Start=132,End=150,#Primer3|Sequence=GCGATCCTAGGGCGATCA,Start=1,End=18,	GGGGACCAGGTGCCGTAAGTGAGTTGTAATAATAATCATAACCATAATCATAATCATAATTACTCCGCGCGCCGTTTATTTTTTTTTTTTTTTTTTCAGGGCCACTGATCCCTTCATTTTGCGGGTTGTCCGGCGATCCTAGGGCGATCA
539	539	0.6458	SetName|SetName=duplicate barcodes hubs pos neg#Context|Name=context_canon_term_neg_YLL013C#Barcode|Sequence=GTCGCAATCCT,Start=19,End=29,#Primer5|Sequence=GGGGACCAGGTGCCGTAAG,Start=132,End=150,#Primer3|Sequence=GCGATCCTAGGGCGATCA,Start=1,End=18,	GGGGACCAGGTGCCGTAAGTTAGTGTTATCATCGTTCTCCTTTCACTTTTTACTATTTTTTTTTTTTTTTTTTTTTTTTTTTTTTCCTCCATTTGTCTTTCACTTACTCTATTTTATTTTGGTCGCAATCCTGCGATCCTAGGGCGATCA
540	540	0.6439	SetName|SetName=duplicate barcodes hubs pos neg#Context|Name=context_canon_term_neg_YLL019C#Barcode|Sequence=GACCGAGTATG,Start=19,End=29,#Primer5|Sequence=GGGGACCAGGTGCCGTAAG,Start=132,End=150,#Primer3|Sequence=GCGATCCTAGGGCGATCA,Start=1,End=18,	GGGGACCAGGTGCCGTAAGTGGGTGTTCTCGTTCTACTTTTCTCTTCTTTTTTTCACATCTTTTACTAGTTCCGTTTTTTTTTTTTTTAACTCTTCTTTTTCATTTTCCGGTTTTTAATAAGACCGAGTATGGCGATCCTAGGGCGATCA
541	541	1.9322	SetName|SetName=duplicate barcodes hubs pos neg#Context|Name=context_canon_term_neg_YMR323W#Barcode|Sequence=GCGAAGTTTGT,Start=19,End=29,#Primer5|Sequence=GGGGACCAGGTGCCGTAAG,Start=132,End=150,#Primer3|Sequence=GCGATCCTAGGGCGATCA,Start=1,End=18,	GGGGACCAGGTGCCGTAAGAGGATTGTCTTGTTTCCTTTTTTTTTTTTTTGTTTTTTTATGACTAAATAAAGTAAATCATATGAGGTTTTATTTTTTATTTCGTTGATTTGGGTTACAGTAGCGAAGTTTGTGCGATCCTAGGGCGATCA
542	542	0.3087	SetName|SetName=duplicate barcodes hubs pos neg#Context|Name=context_canon_term_neg_YNL086W#Barcode|Sequence=CTCCTGACTTT,Start=19,End=29,#Primer5|Sequence=GGGGACCAGGTGCCGTAAG,Start=132,End=150,#Primer3|Sequence=GCGATCCTAGGGCGATCA,Start=1,End=18,	GGGGACCAGGTGCCGTAAGGTAAACATACACATGTATAGCATAATCTTCGATTCCTTTTACCCATTCGTAGATGGCATCGACAGTGTACTTATAATACTACCGTGAGAAACGATATTAAGACTCCTGACTTTGCGATCCTAGGGCGATCA
543	543	1.888	SetName|SetName=duplicate barcodes hubs pos neg#Context|Name=context_canon_term_neg_YNR041C#Barcode|Sequence=GGAGTTGCATG,Start=19,End=29,#Primer5|Sequence=GGGGACCAGGTGCCGTAAG,Start=132,End=150,#Primer3|Sequence=GCGATCCTAGGGCGATCA,Start=1,End=18,	GGGGACCAGGTGCCGTAAGATATAGCGTGCATATACAAGTGTTTAATTGTTCTTTTATTCGATTATTATTTACATGCATTCTTACGTAGATGTCCGTACCTATTTGGGCTTCACGATATTCGGAGTTGCATGGCGATCCTAGGGCGATCA
544	544	2.0686	SetName|SetName=duplicate barcodes hubs pos neg#Context|Name=context_canon_term_neg_YOR390W#Barcode|Sequence=GTTGTACACCT,Start=19,End=29,#Primer5|Sequence=GGGGACCAGGTGCCGTAAG,Start=132,End=150,#Primer3|Sequence=GCGATCCTAGGGCGATCA,Start=1,End=18,	GGGGACCAGGTGCCGTAAGGATCTTTTCTTTATACTTTTCCCTGCATAATCATCCCACTTTTTTTTTTTTTTTTTTTAATTCATTTTCAAGATTTTAGACGTTGTATAATACATTTTTACCGTTGTACACCTGCGATCCTAGGGCGATCA
545	545	3.4204	SetName|SetName=duplicate barcodes hubs pos neg#Context|Name=context_canon_term_neg_YOR393W#Barcode|Sequence=GAATATTGCCA,Start=19,End=29,#Primer5|Sequence=GGGGACCAGGTGCCGTAAG,Start=132,End=150,#Primer3|Sequence=GCGATCCTAGGGCGATCA,Start=1,End=18,	GGGGACCAGGTGCCGTAAGAGGATTGTCTTGTTTCCTTTTTTTTTTTTTTTTTTTTGTTTTTTTATGACTAAATAAAGTAAATCATATGAGGTTTTATTTTTTATTTCGTTGATTTGGGTTGAATATTGCCAGCGATCCTAGGGCGATCA
546	546	2.6097	SetName|SetName=duplicate barcodes hubs pos neg#Context|Name=context_canon_term_neg_YOL124C#Barcode|Sequence=ATCCCTGGTGA,Start=19,End=29,#Primer5|Sequence=GGGGACCAGGTGCCGTAAG,Start=132,End=150,#Primer3|Sequence=GCGATCCTAGGGCGATCA,Start=1,End=18,	GGGGACCAGGTGCCGTAAGAATGATGCATAAGCCCTTTGTAATTTTAAGATATATTTACTTACTCTTTCTCTTAAAGAAAAAAAAAAAAAAAGAAGAACAATTTATCTATACCTATATTTAATCCCTGGTGAGCGATCCTAGGGCGATCA
547	547	4.1654	SetName|SetName=duplicate barcodes hubs pos neg#Context|Name=context_canon_term_neg_YPR172W#Barcode|Sequence=CAGCGACTACC,Start=19,End=29,#Primer5|Sequence=GGGGACCAGGTGCCGTAAG,Start=132,End=150,#Primer3|Sequence=GCGATCCTAGGGCGATCA,Start=1,End=18,	GGGGACCAGGTGCCGTAAGCTGTCCTCTGCTTTTCTTTATCTATTTTGCATACGATTCTGTATTTAATTATTCTGTTTTTTTTTTTTTTTTATTTTTTATTTTCATGTACACAAGAAATCTCAGCGACTACCGCGATCCTAGGGCGATCA
548	548	0.2967	SetName|SetName=duplicate barcodes hubs pos neg#Context|Name=context_canon_term_neg_YPR175W#Barcode|Sequence=GATTTAGCTTT,Start=19,End=29,#Primer5|Sequence=GGGGACCAGGTGCCGTAAG,Start=132,End=150,#Primer3|Sequence=GCGATCCTAGGGCGATCA,Start=1,End=18,	GGGGACCAGGTGCCGTAAGATAATGCATCAAAATAAGAACACTTAAACAAGCACGGTAGTGTTGGTACTCTGCCATCTATTTGTATGGATACTTTTTGAATTTTGATGTAACGGATTTCGGGATTTAGCTTTGCGATCCTAGGGCGATCA
549	549	0.2902	SetName|SetName=duplicate barcodes hubs pos neg#Context|Name=context_canon_term_neg_YPR170C#Barcode|Sequence=TGACACCCGTC,Start=19,End=29,#Primer5|Sequence=GGGGACCAGGTGCCGTAAG,Start=132,End=150,#Primer3|Sequence=GCGATCCTAGGGCGATCA,Start=1,End=18,	GGGGACCAGGTGCCGTAAGTATTGTGGTGTTCTTTTCGATATTCTCAGATACCGTTTATTGTGCGCCATACCGATGGATGCAGAAATATCATTTAAATAGTTAAGCCAGGAAGTGGCTGAGTGACACCCGTCGCGATCCTAGGGCGATCA
550	550	0.2893	SetName|SetName=duplicate barcodes hubs pos neg#Context|Name=context_canon_term_neg_YPR120C#Barcode|Sequence=GAGCTCGCAGG,Start=19,End=29,#Primer5|Sequence=GGGGACCAGGTGCCGTAAG,Start=132,End=150,#Primer3|Sequence=GCGATCCTAGGGCGATCA,Start=1,End=18,	GGGGACCAGGTGCCGTAAGATTAGTACTAGTAATGCTCATGAATTCGCATACTCTTTACATTTTCTTTTCTTTTTGCTGAACTAAAAGGAAAAAATTTTTTGCATCTATCTATCTATCTATGAGCTCGCAGGGCGATCCTAGGGCGATCA
551	551	3.5682	SetName|SetName=duplicate barcodes hubs pos neg#Context|Name=context_canon_term_neg_YPL281C#Barcode|Sequence=AGAGTTTGGAG,Start=19,End=29,#Primer5|Sequence=GGGGACCAGGTGCCGTAAG,Start=132,End=150,#Primer3|Sequence=GCGATCCTAGGGCGATCA,Start=1,End=18,	GGGGACCAGGTGCCGTAAGAGGATTGTCTTGTTTCCTTTTTTTTTTTTTTTTTTTTTGTTTTTTTATGACTAAATAAAGTAAATCATATGAGGTTTTATTTTTTATTTCGTTGATTTGGGTAGAGTTTGGAGGCGATCCTAGGGCGATCA
552	552	5.0415	SetName|SetName=duplicate barcodes hubs pos neg#Context|Name=context_canon_term_pos_YAL016W#Barcode|Sequence=CCTTCTTGCCA,Start=19,End=29,#Primer5|Sequence=GGGGACCAGGTGCCGTAAG,Start=132,End=150,#Primer3|Sequence=GCGATCCTAGGGCGATCA,Start=1,End=18,	GGGGACCAGGTGCCGTAAGTACTAGTTCAAATATATACATACATACACATATGTACACTTGAATGAATAAAAAGTATACATATTAACAACTAGGCCTGCTTTCTTTTCTTTTCTTTTTTTTCCTTCTTGCCAGCGATCCTAGGGCGATCA
553	553	3.5422	SetName|SetName=duplicate barcodes hubs pos neg#Context|Name=context_canon_term_pos_YAR007C#Barcode|Sequence=ACTGAGGTTGT,Start=19,End=29,#Primer5|Sequence=GGGGACCAGGTGCCGTAAG,Start=132,End=150,#Primer3|Sequence=GCGATCCTAGGGCGATCA,Start=1,End=18,	GGGGACCAGGTGCCGTAAGTGTATCAAATAATCAAGTACTATTTAATCTATGTAACATATGAGAAATGTAAAAAAAAAACTTCTATTTCGTCAAGTTTTTGAAGGGCGGTTCAGCATCTCTACTGAGGTTGTGCGATCCTAGGGCGATCA
554	554	4.1183	SetName|SetName=duplicate barcodes hubs pos neg#Context|Name=context_canon_term_pos_YAL044C#Barcode|Sequence=AATCGCTACTT,Start=19,End=29,#Primer5|Sequence=GGGGACCAGGTGCCGTAAG,Start=132,End=150,#Primer3|Sequence=GCGATCCTAGGGCGATCA,Start=1,End=18,	GGGGACCAGGTGCCGTAAGACAAAGCTTATACGTACGTAAAGTAATTTCATATATATGTATATATATGTAGGGGAAATAAAACAATAAACTCAACGTGTACACTTATGCTTATGCATTCTAAATCGCTACTTGCGATCCTAGGGCGATCA
555	555	3.2042	SetName|SetName=duplicate barcodes hubs pos neg#Context|Name=context_canon_term_pos_YBR252W#Barcode|Sequence=AGAGAGGTCCT,Start=19,End=29,#Primer5|Sequence=GGGGACCAGGTGCCGTAAG,Start=132,End=150,#Primer3|Sequence=GCGATCCTAGGGCGATCA,Start=1,End=18,	GGGGACCAGGTGCCGTAAGCTTAGTGTATATACTTTGGCACACTTGTATAATGTATAATAAAATCAGGATAAATCCAGTGTGACCCGGACTGAATTACTGAAACTTTGAAGTGTTAAGGAAAGAGAGGTCCTGCGATCCTAGGGCGATCA
556	556	4.597	SetName|SetName=duplicate barcodes hubs pos neg#Context|Name=context_canon_term_pos_YDR394W#Barcode|Sequence=CAGTCCAGTTG,Start=19,End=29,#Primer5|Sequence=GGGGACCAGGTGCCGTAAG,Start=132,End=150,#Primer3|Sequence=GCGATCCTAGGGCGATCA,Start=1,End=18,	GGGGACCAGGTGCCGTAAGTTACCATATATGCTTCAACGTAGGTCTACATAAAGTATTACGTACATTTCTATCTAGACAACACTAAATGAAATAAATACAGACGCCACTTTTTTATCACGTCAGTCCAGTTGGCGATCCTAGGGCGATCA
557	557	2.8488	SetName|SetName=duplicate barcodes hubs pos neg#Context|Name=context_canon_term_pos_YDR375C#Barcode|Sequence=AGGGCCTTAGA,Start=19,End=29,#Primer5|Sequence=GGGGACCAGGTGCCGTAAG,Start=132,End=150,#Primer3|Sequence=GCGATCCTAGGGCGATCA,Start=1,End=18,	GGGGACCAGGTGCCGTAAGGTGCTAAGTGGCGCCTTACTACATAACTTGTATATAATAAAAATTCAGAAGATGCTTTAACTTTTTCTCGTTAATAAGACCGAGTTATTTGCTATTACGAACAGGGCCTTAGAGCGATCCTAGGGCGATCA
558	558	3.1681	SetName|SetName=duplicate barcodes hubs pos neg#Context|Name=context_canon_term_pos_YDR050C#Barcode|Sequence=TAACTCACATA,Start=19,End=29,#Primer5|Sequence=GGGGACCAGGTGCCGTAAG,Start=132,End=150,#Primer3|Sequence=GCGATCCTAGGGCGATCA,Start=1,End=18,	GGGGACCAGGTGCCGTAAGGATTAATATAATTATATAAAAATATTATCTTCTTTTCTTTATATCTAGTGTTATGTAAAATAAATTGATGACTACGGAAAGCTTTTTTATATTGTTTCTTTTTAACTCACATAGCGATCCTAGGGCGATCA
559	559	2.3812	SetName|SetName=duplicate barcodes hubs pos neg#Context|Name=context_canon_term_pos_YDL044C#Barcode|Sequence=GGCAGATTACA,Start=19,End=29,#Primer5|Sequence=GGGGACCAGGTGCCGTAAG,Start=132,End=150,#Primer3|Sequence=GCGATCCTAGGGCGATCA,Start=1,End=18,	GGGGACCAGGTGCCGTAAGAAAATTATTCAAACCTTGTAAATAGTGTTATATATATGTGTTAGACTTAAAAGCGCTAATAAACGTTCCTGCTCGCATTTAACTTCTGTTCCAATTTTCCTAGGCAGATTACAGCGATCCTAGGGCGATCA
560	560	1.236	SetName|SetName=duplicate barcodes hubs pos neg#Context|Name=context_canon_term_pos_YDL227C#Barcode|Sequence=CAATACTAGGT,Start=19,End=29,#Primer5|Sequence=GGGGACCAGGTGCCGTAAG,Start=132,End=150,#Primer3|Sequence=GCGATCCTAGGGCGATCA,Start=1,End=18,	GGGGACCAGGTGCCGTAAGAATGTGTATATTAGTTTAAAAAGTTGTATGTAATAAAAGTAAAATTTAATATTTTGGATGAAAAAAACCATTTTTAGACTTTTTCTTAACTAGAATGCTGGACAATACTAGGTGCGATCCTAGGGCGATCA
561	561	4.6323	SetName|SetName=duplicate barcodes hubs pos neg#Context|Name=context_canon_term_pos_YEL059C_A#Barcode|Sequence=TCTCAGCGCAC,Start=19,End=29,#Primer5|Sequence=GGGGACCAGGTGCCGTAAG,Start=132,End=150,#Primer3|Sequence=GCGATCCTAGGGCGATCA,Start=1,End=18,	GGGGACCAGGTGCCGTAAGAAATTACATATACTCTATATAGCACAGTAGTGTGATAAATAAAAAATTTTGCCAAGACTTTTTTAAACTGCACCCGACAGATCAGGTCTGTGCCTACTATGCTCTCAGCGCACGCGATCCTAGGGCGATCA
562	562	4.2823	SetName|SetName=duplicate barcodes hubs pos neg#Context|Name=context_canon_term_pos_YFL009W#Barcode|Sequence=GACCCATTGCA,Start=19,End=29,#Primer5|Sequence=GGGGACCAGGTGCCGTAAG,Start=132,End=150,#Primer3|Sequence=GCGATCCTAGGGCGATCA,Start=1,End=18,	GGGGACCAGGTGCCGTAAGCCTTTCCCAGAGAATAAGCATTGACTCATACTTAGATAATATAGCTTAATAAGTAGTTATATAATCAGTAAAAAAGTACAATAACAACTTCGTACATTTTATGACCCATTGCAGCGATCCTAGGGCGATCA
563	563	3.8342	SetName|SetName=duplicate barcodes hubs pos neg#Context|Name=context_canon_term_pos_YFR039C#Barcode|Sequence=TCCACGACAGG,Start=19,End=29,#Primer5|Sequence=GGGGACCAGGTGCCGTAAG,Start=132,End=150,#Primer3|Sequence=GCGATCCTAGGGCGATCA,Start=1,End=18,	GGGGACCAGGTGCCGTAAGTCAATATATAGGTATGTATATGTACATATATACAAACATTTAATAAAAACAATATTGTATGATAACCAAGTTAAAGACCGGAGGTTGTTTCAAATAGCTTGATCCACGACAGGGCGATCCTAGGGCGATCA
564	564	3.1277	SetName|SetName=duplicate barcodes hubs pos neg#Context|Name=context_canon_term_pos_YGR166W#Barcode|Sequence=TTGCAGCTGAC,Start=19,End=29,#Primer5|Sequence=GGGGACCAGGTGCCGTAAG,Start=132,End=150,#Primer3|Sequence=GCGATCCTAGGGCGATCA,Start=1,End=18,	GGGGACCAGGTGCCGTAAGGCGGAACAAGTATACATTTTATTAACATAGACTACATACTAATCTGTAACATTTCTATAAAAAAGTTATTATCATCACATTACACGATAGAAACACTTCCATTTGCAGCTGACGCGATCCTAGGGCGATCA
565	565	2.7212	SetName|SetName=duplicate barcodes hubs pos neg#Context|Name=context_canon_term_pos_YHR200W#Barcode|Sequence=TGAACGACGTG,Start=19,End=29,#Primer5|Sequence=GGGGACCAGGTGCCGTAAG,Start=132,End=150,#Primer3|Sequence=GCGATCCTAGGGCGATCA,Start=1,End=18,	GGGGACCAGGTGCCGTAAGTAGTGTACAAAAATATCTATATGGGTCATATATAAACCAAATAAAGCATATATAACATCTCCCTTCACTCTTCCAGGTTTGAGTACGCTTCCTCTAAATAGGTGAACGACGTGGCGATCCTAGGGCGATCA
566	566	2.611	SetName|SetName=duplicate barcodes hubs pos neg#Context|Name=context_canon_term_pos_YIR021W#Barcode|Sequence=TTGACGGTACA,Start=19,End=29,#Primer5|Sequence=GGGGACCAGGTGCCGTAAG,Start=132,End=150,#Primer3|Sequence=GCGATCCTAGGGCGATCA,Start=1,End=18,	GGGGACCAGGTGCCGTAAGTCCTCTTATATAGCATGTAAATAGAAAGTACGTAAAAAAAAGCTACTATTGACTTTATTCTCCGTGAGGGCGGTTCTTTCTGTAGCTGTTGGTTTTTTCCAGTTGACGGTACAGCGATCCTAGGGCGATCA
567	567	3.3089	SetName|SetName=duplicate barcodes hubs pos neg#Context|Name=context_canon_term_pos_YIR035C#Barcode|Sequence=CCTCCACTACT,Start=19,End=29,#Primer5|Sequence=GGGGACCAGGTGCCGTAAG,Start=132,End=150,#Primer3|Sequence=GCGATCCTAGGGCGATCA,Start=1,End=18,	GGGGACCAGGTGCCGTAAGGGATAGCAGGTACATATAAATTGTTACATACTAAGTCGATGAGTCAAAAAAGACTCTTATACATTTATACATTTTGCATTATTATTTTTTTTTTCCAGCGGACCTCCACTACTGCGATCCTAGGGCGATCA
568	568	4.5174	SetName|SetName=duplicate barcodes hubs pos neg#Context|Name=context_canon_term_pos_YIL115C#Barcode|Sequence=TAAGCGATTGT,Start=19,End=29,#Primer5|Sequence=GGGGACCAGGTGCCGTAAG,Start=132,End=150,#Primer3|Sequence=GCGATCCTAGGGCGATCA,Start=1,End=18,	GGGGACCAGGTGCCGTAAGTGATATTTAGCTATATGTACGTTGTTAGTGCCGTTAATAATAAATTCATCCTCTATCATAGAAACAGGGCATGAGAAACGAAGAAAAATTGATATTGTAACATAAGCGATTGTGCGATCCTAGGGCGATCA
569	569	3.8901	SetName|SetName=duplicate barcodes hubs pos neg#Context|Name=context_canon_term_pos_YJL050W#Barcode|Sequence=TCGACCGCTAC,Start=19,End=29,#Primer5|Sequence=GGGGACCAGGTGCCGTAAG,Start=132,End=150,#Primer3|Sequence=GCGATCCTAGGGCGATCA,Start=1,End=18,	GGGGACCAGGTGCCGTAAGTTAATCACACACAATTATGTATTTTTATTGGTATATATAATAAACAAATAGATTTCATCAACATTTATTATATAATAACATTTTTGTTTGGGCAAGCACACTTCGACCGCTACGCGATCCTAGGGCGATCA
570	570	3.3398	SetName|SetName=duplicate barcodes hubs pos neg#Context|Name=context_canon_term_pos_YJR100C#Barcode|Sequence=TTGTGTAGCTA,Start=19,End=29,#Primer5|Sequence=GGGGACCAGGTGCCGTAAG,Start=132,End=150,#Primer3|Sequence=GCGATCCTAGGGCGATCA,Start=1,End=18,	GGGGACCAGGTGCCGTAAGGTGAATTATATATTTAAAAGAATTCTGTAAATACATATTTGACTACGCAGTAATAAAACAATTATTATTCCCAATTAGGGCCCAATCCTAGCATAGCAAAGTTTGTGTAGCTAGCGATCCTAGGGCGATCA
571	571	1.7894	SetName|SetName=duplicate barcodes hubs pos neg#Context|Name=context_canon_term_pos_YJL204C#Barcode|Sequence=CCAGTCATACG,Start=19,End=29,#Primer5|Sequence=GGGGACCAGGTGCCGTAAG,Start=132,End=150,#Primer3|Sequence=GCGATCCTAGGGCGATCA,Start=1,End=18,	GGGGACCAGGTGCCGTAAGATTCCTATCAATGATTAATTATATTACTCTATATAGGTATGAAGTGCGGAAATAAAAGACTGTTCACATATTAGATTATTCAAGATTACGCGGGCTCTATTTCCAGTCATACGGCGATCCTAGGGCGATCA
572	572	3.0535	SetName|SetName=duplicate barcodes hubs pos neg#Context|Name=context_canon_term_pos_YLR064W#Barcode|Sequence=GAACCGACACT,Start=19,End=29,#Primer5|Sequence=GGGGACCAGGTGCCGTAAG,Start=132,End=150,#Primer3|Sequence=GCGATCCTAGGGCGATCA,Start=1,End=18,	GGGGACCAGGTGCCGTAAGCATGCTCATTTTAAGTATATCTAAATATTATTTTGTATATACTCACACTCCTCTATAGAAAGCAAAAAATTTCAAAAACGTTTGAAAAGCTTTGTTTAACGAGAACCGACACTGCGATCCTAGGGCGATCA
573	573	2.3787	SetName|SetName=duplicate barcodes hubs pos neg#Context|Name=context_canon_term_pos_YLR298C#Barcode|Sequence=CACGAACGCGT,Start=19,End=29,#Primer5|Sequence=GGGGACCAGGTGCCGTAAG,Start=132,End=150,#Primer3|Sequence=GCGATCCTAGGGCGATCA,Start=1,End=18,	GGGGACCAGGTGCCGTAAGCGCTATCAGATTAGATTATTAAATATTATATGTAGACTATATTTTGCCAAAAAAAACAATAGAGATATCAACAACGAATGAAAATGGTATGATGAGAATAAACACGAACGCGTGCGATCCTAGGGCGATCA
574	574	4.7259	SetName|SetName=duplicate barcodes hubs pos neg#Context|Name=context_canon_term_pos_YLR272C#Barcode|Sequence=CACTTACACAG,Start=19,End=29,#Primer5|Sequence=GGGGACCAGGTGCCGTAAG,Start=132,End=150,#Primer3|Sequence=GCGATCCTAGGGCGATCA,Start=1,End=18,	GGGGACCAGGTGCCGTAAGTCGAACTGACGTTTACCCGTTTCTTCCGTTTTATATTATATGTTATTATATAAATAAAAGCTGTTCATTTCTTTCTTCTTGAAATATGACTTTACCTATCTCCACTTACACAGGCGATCCTAGGGCGATCA
575	575		SetName|SetName=duplicate barcodes hubs pos neg#Context|Name=context_canon_term_pos_YNR049C#Barcode|Sequence=ACCTAGAAGCA,Start=19,End=29,#Primer5|Sequence=GGGGACCAGGTGCCGTAAG,Start=132,End=150,#Primer3|Sequence=GCGATCCTAGGGCGATCA,Start=1,End=18,	GGGGACCAGGTGCCGTAAGATAGCACTATACCTTGCTGAAATAAAGCGAAAAGAACATTTAATGAATATATAGGTATCGTATATGTACTGAATAAAGTGTTTGATACAGAATGCAAGGAGAACCTAGAAGCAGCGATCCTAGGGCGATCA
576	576	2.2951	SetName|SetName=duplicate barcodes hubs pos neg#Context|Name=context_canon_term_pos_YNL011C#Barcode|Sequence=TCGACCACGCC,Start=19,End=29,#Primer5|Sequence=GGGGACCAGGTGCCGTAAG,Start=132,End=150,#Primer3|Sequence=GCGATCCTAGGGCGATCA,Start=1,End=18,	GGGGACCAGGTGCCGTAAGTGCAACTATGTCGCTCATTAACGGTTATTATAGTGAAGACTACATAATAAAGACATAGATAATAAAAAAGAATCGCGTTTGAACCATGTTTTATTTAACCATTCGACCACGCCGCGATCCTAGGGCGATCA
577	577	2.034	SetName|SetName=duplicate barcodes hubs pos neg#Context|Name=context_canon_term_pos_YNL231C#Barcode|Sequence=CGAATCCCTCT,Start=19,End=29,#Primer5|Sequence=GGGGACCAGGTGCCGTAAG,Start=132,End=150,#Primer3|Sequence=GCGATCCTAGGGCGATCA,Start=1,End=18,	GGGGACCAGGTGCCGTAAGAGGCAAATTTAGATAGATAATGATAATGCACTATAATATATAATAAATAAAAGAGAATAAAAAGTTTAATCACGTTCCCGCTTCTTTTTCCTAACCATCAAACGAATCCCTCTGCGATCCTAGGGCGATCA
578	578	1.9179	SetName|SetName=duplicate barcodes hubs pos neg#Context|Name=context_canon_term_pos_YOL009C#Barcode|Sequence=ACACCGACTGG,Start=19,End=29,#Primer5|Sequence=GGGGACCAGGTGCCGTAAG,Start=132,End=150,#Primer3|Sequence=GCGATCCTAGGGCGATCA,Start=1,End=18,	GGGGACCAGGTGCCGTAAGTTTAACAAAGATAGTTTGAAAATAGTGTCTACATAAAAAAACAAACATTTTTGAGCTGGAAAATTATATTTTGTCATGAAGTAATCTATTCTTAACGCGCTTACACCGACTGGGCGATCCTAGGGCGATCA
579	579	3.5983	SetName|SetName=duplicate barcodes hubs pos neg#Context|Name=context_canon_term_pos_YOL073C#Barcode|Sequence=GGGACTTTACG,Start=19,End=29,#Primer5|Sequence=GGGGACCAGGTGCCGTAAG,Start=132,End=150,#Primer3|Sequence=GCGATCCTAGGGCGATCA,Start=1,End=18,	GGGGACCAGGTGCCGTAAGTTTATATCAGCATATACCTACATAAACAAATAAACATAGCAACGGTTTAGCAACATCGTTTACAGCCATGTGAGGCAGTTACTTCTATCATATGTCTGGCTTGGGACTTTACGGCGATCCTAGGGCGATCA
580	580	3.7972	SetName|SetName=duplicate barcodes hubs pos neg#Context|Name=context_canon_term_pos_YPL006W#Barcode|Sequence=GCTTAAATTCG,Start=19,End=29,#Primer5|Sequence=GGGGACCAGGTGCCGTAAG,Start=132,End=150,#Primer3|Sequence=GCGATCCTAGGGCGATCA,Start=1,End=18,	GGGGACCAGGTGCCGTAAGCCATAGCAGATTATACTATATTTTACGTAGTGAAAAAATAGGTAAAAATTCGTTAATTATTCTGATGCCACACCAGAAAATCTGTGGGAAAATTTTTCGAGTGCTTAAATTCGGCGATCCTAGGGCGATCA
581	581	0.6354	SetName|SetName=duplicate barcodes hubs pos neg#Context|Name=context_canon_term_neg_YBL097W#Barcode|Sequence=AAGGTTGCTCG,Start=19,End=29,#Primer5|Sequence=GGGGACCAGGTGCCGTAAG,Start=132,End=150,#Primer3|Sequence=GCGATCCTAGGGCGATCA,Start=1,End=18,	GGGGACCAGGTGCCGTAAGTTGATGATCTTTTTTTTTTTTTTTTTTTTTTTTTTTGTGCTGCAAAGTTTCTTAAAGCCTTCGGGCTTACGAAATCCTTTATCGCCGAAAGGGGACCGCTTCAAGGTTGCTCGGCGATCCTAGGGCGATCA
582	582	4.8668	SetName|SetName=duplicate barcodes hubs pos neg#Context|Name=context_canon_term_neg_YBL075C#Barcode|Sequence=ACCTGAGTACT,Start=19,End=29,#Primer5|Sequence=GGGGACCAGGTGCCGTAAG,Start=132,End=150,#Primer3|Sequence=GCGATCCTAGGGCGATCA,Start=1,End=18,	GGGGACCAGGTGCCGTAAGTTATTCTTCTATAGTGTTCTATTTAGCTACTTTTTATGTTTAACCTTTTATACGATGGCGGGTAATCTATCCATGATGACGAAAAATTTTTTTTTTTTTTGTACCTGAGTACTGCGATCCTAGGGCGATCA
583	583		SetName|SetName=duplicate barcodes hubs pos neg#Context|Name=context_canon_term_neg_YBL088C#Barcode|Sequence=AAAAGTAGGTG,Start=19,End=29,#Primer5|Sequence=GGGGACCAGGTGCCGTAAG,Start=132,End=150,#Primer3|Sequence=GCGATCCTAGGGCGATCA,Start=1,End=18,	GGGGACCAGGTGCCGTAAGTTGCTATGCAGATGCTTTATACTTCTTTTTTTTGTTTATAGAAATACGAAAAGTAATGTACAAACTCAATGTGATGATGTGCCCAAAAATACAATCGCTGATAAAAGTAGGTGGCGATCCTAGGGCGATCA
584	584	2.5149	SetName|SetName=duplicate barcodes hubs pos neg#Context|Name=context_canon_term_neg_YCR032W#Barcode|Sequence=TTACGCACTTG,Start=19,End=29,#Primer5|Sequence=GGGGACCAGGTGCCGTAAG,Start=132,End=150,#Primer3|Sequence=GCGATCCTAGGGCGATCA,Start=1,End=18,	GGGGACCAGGTGCCGTAAGGCATCACATCGTAACGCCTTTCTTTAAATGATTCAATTTTTGTAGTTTATATCTTTACTTTTGAAACTGATTTCTCATCCCATCTAGTATTGTAATTGCGTATTACGCACTTGGCGATCCTAGGGCGATCA
585	585	0.7564	SetName|SetName=duplicate barcodes hubs pos neg#Context|Name=context_canon_term_neg_YDR325W#Barcode|Sequence=GAGATACCCTT,Start=19,End=29,#Primer5|Sequence=GGGGACCAGGTGCCGTAAG,Start=132,End=150,#Primer3|Sequence=GCGATCCTAGGGCGATCA,Start=1,End=18,	GGGGACCAGGTGCCGTAAGAATTGATATGCGAGCTCTTCATCTATTTAAGTTGATTTTTTGGTTGTAAACATATTTGTATTTTATTCTTAGGTTTGTTAATTCTTCTACGCTTACCAGATAGAGATACCCTTGCGATCCTAGGGCGATCA
586	586	3.4999	SetName|SetName=duplicate barcodes hubs pos neg#Context|Name=context_canon_term_neg_YDR457W#Barcode|Sequence=CGGCTGTACTC,Start=19,End=29,#Primer5|Sequence=GGGGACCAGGTGCCGTAAG,Start=132,End=150,#Primer3|Sequence=GCGATCCTAGGGCGATCA,Start=1,End=18,	GGGGACCAGGTGCCGTAAGTCATTTTTCGTGTAAATTTATAGCGCCATGTAACCAAGTATTTTAGAACGTCTTTTATTTAAACCTTTAACCATACAACACTTGCCCAAGGAAGAGGAACAGCGGCTGTACTCGCGATCCTAGGGCGATCA
587	587	0.464	SetName|SetName=duplicate barcodes hubs pos neg#Context|Name=context_canon_term_neg_YDL205C#Barcode|Sequence=ATCGGCATGTA,Start=19,End=29,#Primer5|Sequence=GGGGACCAGGTGCCGTAAG,Start=132,End=150,#Primer3|Sequence=GCGATCCTAGGGCGATCA,Start=1,End=18,	GGGGACCAGGTGCCGTAAGACACCATTAATTTGATCAGTCCAAAAACTCTATTATTACTAACTAAAGTTCCCTTTTTTTTTTTTTTTTTTTTTTTTTTCCTTATCTCCTTTATCTTTCAGTATCGGCATGTAGCGATCCTAGGGCGATCA
588	588	1.6552	SetName|SetName=duplicate barcodes hubs pos neg#Context|Name=context_canon_term_neg_YER013W#Barcode|Sequence=ACGGGCACTTG,Start=19,End=29,#Primer5|Sequence=GGGGACCAGGTGCCGTAAG,Start=132,End=150,#Primer3|Sequence=GCGATCCTAGGGCGATCA,Start=1,End=18,	GGGGACCAGGTGCCGTAAGCATTGTTAGCTTTTTATGCATTATAATTATCGAGTTTTATAGACCTATATTTAATTTTTTAACAACTTTATCTCTCTTGAGAATTTTTACATGAAAAAAATCACGGGCACTTGGCGATCCTAGGGCGATCA
589	589	2.1683	SetName|SetName=duplicate barcodes hubs pos neg#Context|Name=context_canon_term_neg_YFL054C#Barcode|Sequence=AATTACGTCCT,Start=19,End=29,#Primer5|Sequence=GGGGACCAGGTGCCGTAAG,Start=132,End=150,#Primer3|Sequence=GCGATCCTAGGGCGATCA,Start=1,End=18,	GGGGACCAGGTGCCGTAAGTTAATATTTTCAATTTTTTACGATTTATAACCTAATTATTAATTTCACGAACTTATTATTTGACGACATACTACATCCGGGAGCCGTGACTTTGTTACCATCAATTACGTCCTGCGATCCTAGGGCGATCA
590	590	0.5774	SetName|SetName=duplicate barcodes hubs pos neg#Context|Name=context_canon_term_neg_YGR126W#Barcode|Sequence=AGTCACCGCAC,Start=19,End=29,#Primer5|Sequence=GGGGACCAGGTGCCGTAAG,Start=132,End=150,#Primer3|Sequence=GCGATCCTAGGGCGATCA,Start=1,End=18,	GGGGACCAGGTGCCGTAAGGTGGCATAGCAACATTTAGTTCGCAATGCGTTTACTTCAGAATCATTCTTTTTTTTTTTTTTTTTTTTTTTTTGCCTCACATTATATTCTTGGCATCTGCCTAGTCACCGCACGCGATCCTAGGGCGATCA
591	591	3.2401	SetName|SetName=duplicate barcodes hubs pos neg#Context|Name=context_canon_term_neg_YGL194C#Barcode|Sequence=GTATGAAAGTT,Start=19,End=29,#Primer5|Sequence=GGGGACCAGGTGCCGTAAG,Start=132,End=150,#Primer3|Sequence=GCGATCCTAGGGCGATCA,Start=1,End=18,	GGGGACCAGGTGCCGTAAGTTTAAGAGTTTGCTATTCGGTTAATCTCCCGTTTTTTTTTTTTTTTTTTTTTTTATTTTCCTTTTTTTTTTTTTAATGTTTTTAGCATATTATGTAGAGTGTGTATGAAAGTTGCGATCCTAGGGCGATCA
592	592	0.646	SetName|SetName=duplicate barcodes hubs pos neg#Context|Name=context_canon_term_neg_YHL030W_A#Barcode|Sequence=ATGTACTGTAA,Start=19,End=29,#Primer5|Sequence=GGGGACCAGGTGCCGTAAG,Start=132,End=150,#Primer3|Sequence=GCGATCCTAGGGCGATCA,Start=1,End=18,	GGGGACCAGGTGCCGTAAGTTTATTTTTTCCTTGTCTTTTTATCTCTTTTTTTTTGTTTTTCGTTCTCTTTATTTTCAACAACGCCTAGAAAATTTGGTTACCAACCACACTATTGAACAAATGTACTGTAAGCGATCCTAGGGCGATCA
593	593	0.6522	SetName|SetName=duplicate barcodes hubs pos neg#Context|Name=context_canon_term_neg_YIL054W#Barcode|Sequence=CGGCTGCTTAA,Start=19,End=29,#Primer5|Sequence=GGGGACCAGGTGCCGTAAG,Start=132,End=150,#Primer3|Sequence=GCGATCCTAGGGCGATCA,Start=1,End=18,	GGGGACCAGGTGCCGTAAGTGATGTGTGAGTTCCTCTTTTCTTTTTTTCTTTTCTTTTTTCCTTTTTTTTTCTTTTCTTACTCTGTTAATCACTTTCTTTCCTTTTTGTTCATATTGTCGTCGGCTGCTTAAGCGATCCTAGGGCGATCA
594	594	0.4783	SetName|SetName=duplicate barcodes hubs pos neg#Context|Name=context_canon_term_neg_YIL084C#Barcode|Sequence=CCTAAATAGAG,Start=19,End=29,#Primer5|Sequence=GGGGACCAGGTGCCGTAAG,Start=132,End=150,#Primer3|Sequence=GCGATCCTAGGGCGATCA,Start=1,End=18,	GGGGACCAGGTGCCGTAAGTTTATTTTATGCTGCAAACCTTCCACTTTAACTTTGTATTATATTACATTAGATGGTTATATTTCAATGTGAGCTCTTTTTGTTTTTGCTTTCTTTTCTCGGCCTAAATAGAGGCGATCCTAGGGCGATCA
595	595	0.4801	SetName|SetName=duplicate barcodes hubs pos neg#Context|Name=context_canon_term_neg_YIL105C#Barcode|Sequence=CACGAAGTGCC,Start=19,End=29,#Primer5|Sequence=GGGGACCAGGTGCCGTAAG,Start=132,End=150,#Primer3|Sequence=GCGATCCTAGGGCGATCA,Start=1,End=18,	GGGGACCAGGTGCCGTAAGATACAAGTATAGTAAACTAGAATGTTTTTATTTCCTTCCATCCATATGTTATATTAATATGTTTCCGTATTTTTGTTTTTGTGTCCCATGCATGGAAGAATACACGAAGTGCCGCGATCCTAGGGCGATCA
596	596	2.5909	SetName|SetName=duplicate barcodes hubs pos neg#Context|Name=context_canon_term_neg_YKL143W#Barcode|Sequence=GAATGGATCCC,Start=19,End=29,#Primer5|Sequence=GGGGACCAGGTGCCGTAAG,Start=132,End=150,#Primer3|Sequence=GCGATCCTAGGGCGATCA,Start=1,End=18,	GGGGACCAGGTGCCGTAAGAGGAGTAGAATGAGATGAGAAAGCACCTACATTACAAGTACTGTGTAGACATGTATACTTAGCCTAGAATGCATTGATGCTAAAATACATCCTGCCCACCGGGAATGGATCCCGCGATCCTAGGGCGATCA
597	597	4.393	SetName|SetName=duplicate barcodes hubs pos neg#Context|Name=context_canon_term_neg_YLR450W#Barcode|Sequence=CCCTAAAAGTT,Start=19,End=29,#Primer5|Sequence=GGGGACCAGGTGCCGTAAG,Start=132,End=150,#Primer3|Sequence=GCGATCCTAGGGCGATCA,Start=1,End=18,	GGGGACCAGGTGCCGTAAGCTCTTGTAGTTTACATGGTGATACTTTATATCTTTGTATTGTCTAGCTATTCTAAATCATCTGCATGTAATAAGAAGTTGATCAAAATGACTCGCTGCGTAACCCTAAAAGTTGCGATCCTAGGGCGATCA
598	598	4.0581	SetName|SetName=duplicate barcodes hubs pos neg#Context|Name=context_canon_term_neg_YLR277C#Barcode|Sequence=TTTGTACGTCG,Start=19,End=29,#Primer5|Sequence=GGGGACCAGGTGCCGTAAG,Start=132,End=150,#Primer3|Sequence=GCGATCCTAGGGCGATCA,Start=1,End=18,	GGGGACCAGGTGCCGTAAGAAACAGTTACGCATACTAAGTAGACTACTTTATAGAAGTAATACCAAACCAAAATCTGGTTAGAACTGCCTTTTATTGTTTACCTTAATCACTCTTTACGTATTTGTACGTCGGCGATCCTAGGGCGATCA
599	599	0.3772	SetName|SetName=duplicate barcodes hubs pos neg#Context|Name=context_canon_term_neg_YLR055C#Barcode|Sequence=AGTGCGCTTCA,Start=19,End=29,#Primer5|Sequence=GGGGACCAGGTGCCGTAAG,Start=132,End=150,#Primer3|Sequence=GCGATCCTAGGGCGATCA,Start=1,End=18,	GGGGACCAGGTGCCGTAAGTGAGTTGTAATAATAATCATAACCATAATCATAATCATAATTACTCCGCGCGCCGTTTATTTTTTTTTTTTTTTTTTCAGGGCCACTGATCCCTTCATTTTGAGTGCGCTTCAGCGATCCTAGGGCGATCA
600	600	0.6478	SetName|SetName=duplicate barcodes hubs pos neg#Context|Name=context_canon_term_neg_YLL013C#Barcode|Sequence=GACCCGTGCGT,Start=19,End=29,#Primer5|Sequence=GGGGACCAGGTGCCGTAAG,Start=132,End=150,#Primer3|Sequence=GCGATCCTAGGGCGATCA,Start=1,End=18,	GGGGACCAGGTGCCGTAAGTTAGTGTTATCATCGTTCTCCTTTCACTTTTTACTATTTTTTTTTTTTTTTTTTTTTTTTTTTTTTCCTCCATTTGTCTTTCACTTACTCTATTTTATTTTGGACCCGTGCGTGCGATCCTAGGGCGATCA
601	601	0.6314	SetName|SetName=duplicate barcodes hubs pos neg#Context|Name=context_canon_term_neg_YLL019C#Barcode|Sequence=GCCTAGCTTGC,Start=19,End=29,#Primer5|Sequence=GGGGACCAGGTGCCGTAAG,Start=132,End=150,#Primer3|Sequence=GCGATCCTAGGGCGATCA,Start=1,End=18,	GGGGACCAGGTGCCGTAAGTGGGTGTTCTCGTTCTACTTTTCTCTTCTTTTTTTCACATCTTTTACTAGTTCCGTTTTTTTTTTTTTTAACTCTTCTTTTTCATTTTCCGGTTTTTAATAAGCCTAGCTTGCGCGATCCTAGGGCGATCA
602	602	3.156	SetName|SetName=duplicate barcodes hubs pos neg#Context|Name=context_canon_term_neg_YMR323W#Barcode|Sequence=TTACTACGTAC,Start=19,End=29,#Primer5|Sequence=GGGGACCAGGTGCCGTAAG,Start=132,End=150,#Primer3|Sequence=GCGATCCTAGGGCGATCA,Start=1,End=18,	GGGGACCAGGTGCCGTAAGAGGATTGTCTTGTTTCCTTTTTTTTTTTTTTGTTTTTTTATGACTAAATAAAGTAAATCATATGAGGTTTTATTTTTTATTTCGTTGATTTGGGTTACAGTATTACTACGTACGCGATCCTAGGGCGATCA
603	603	0.3329	SetName|SetName=duplicate barcodes hubs pos neg#Context|Name=context_canon_term_neg_YNL086W#Barcode|Sequence=TCATGGTCTAG,Start=19,End=29,#Primer5|Sequence=GGGGACCAGGTGCCGTAAG,Start=132,End=150,#Primer3|Sequence=GCGATCCTAGGGCGATCA,Start=1,End=18,	GGGGACCAGGTGCCGTAAGGTAAACATACACATGTATAGCATAATCTTCGATTCCTTTTACCCATTCGTAGATGGCATCGACAGTGTACTTATAATACTACCGTGAGAAACGATATTAAGATCATGGTCTAGGCGATCCTAGGGCGATCA
604	604	2.7633	SetName|SetName=duplicate barcodes hubs pos neg#Context|Name=context_canon_term_neg_YNR041C#Barcode|Sequence=AACGACAGGTT,Start=19,End=29,#Primer5|Sequence=GGGGACCAGGTGCCGTAAG,Start=132,End=150,#Primer3|Sequence=GCGATCCTAGGGCGATCA,Start=1,End=18,	GGGGACCAGGTGCCGTAAGATATAGCGTGCATATACAAGTGTTTAATTGTTCTTTTATTCGATTATTATTTACATGCATTCTTACGTAGATGTCCGTACCTATTTGGGCTTCACGATATTCAACGACAGGTTGCGATCCTAGGGCGATCA
605	605		SetName|SetName=duplicate barcodes hubs pos neg#Context|Name=context_canon_term_neg_YOR390W#Barcode|Sequence=TTTACGTGCTG,Start=19,End=29,#Primer5|Sequence=GGGGACCAGGTGCCGTAAG,Start=132,End=150,#Primer3|Sequence=GCGATCCTAGGGCGATCA,Start=1,End=18,	GGGGACCAGGTGCCGTAAGGATCTTTTCTTTATACTTTTCCCTGCATAATCATCCCACTTTTTTTTTTTTTTTTTTTAATTCATTTTCAAGATTTTAGACGTTGTATAATACATTTTTACCTTTACGTGCTGGCGATCCTAGGGCGATCA
606	606	4.3127	SetName|SetName=duplicate barcodes hubs pos neg#Context|Name=context_canon_term_neg_YOR393W#Barcode|Sequence=CAAGTGACCCG,Start=19,End=29,#Primer5|Sequence=GGGGACCAGGTGCCGTAAG,Start=132,End=150,#Primer3|Sequence=GCGATCCTAGGGCGATCA,Start=1,End=18,	GGGGACCAGGTGCCGTAAGAGGATTGTCTTGTTTCCTTTTTTTTTTTTTTTTTTTTGTTTTTTTATGACTAAATAAAGTAAATCATATGAGGTTTTATTTTTTATTTCGTTGATTTGGGTTCAAGTGACCCGGCGATCCTAGGGCGATCA
607	607	2.0002	SetName|SetName=duplicate barcodes hubs pos neg#Context|Name=context_canon_term_neg_YOL124C#Barcode|Sequence=CCAACCGCTGT,Start=19,End=29,#Primer5|Sequence=GGGGACCAGGTGCCGTAAG,Start=132,End=150,#Primer3|Sequence=GCGATCCTAGGGCGATCA,Start=1,End=18,	GGGGACCAGGTGCCGTAAGAATGATGCATAAGCCCTTTGTAATTTTAAGATATATTTACTTACTCTTTCTCTTAAAGAAAAAAAAAAAAAAAGAAGAACAATTTATCTATACCTATATTTACCAACCGCTGTGCGATCCTAGGGCGATCA
608	608	4.116	SetName|SetName=duplicate barcodes hubs pos neg#Context|Name=context_canon_term_neg_YPR172W#Barcode|Sequence=TGGCCTCGCTG,Start=19,End=29,#Primer5|Sequence=GGGGACCAGGTGCCGTAAG,Start=132,End=150,#Primer3|Sequence=GCGATCCTAGGGCGATCA,Start=1,End=18,	GGGGACCAGGTGCCGTAAGCTGTCCTCTGCTTTTCTTTATCTATTTTGCATACGATTCTGTATTTAATTATTCTGTTTTTTTTTTTTTTTTATTTTTTATTTTCATGTACACAAGAAATCTTGGCCTCGCTGGCGATCCTAGGGCGATCA
609	609	0.29	SetName|SetName=duplicate barcodes hubs pos neg#Context|Name=context_canon_term_neg_YPR175W#Barcode|Sequence=TAATGGGTCAG,Start=19,End=29,#Primer5|Sequence=GGGGACCAGGTGCCGTAAG,Start=132,End=150,#Primer3|Sequence=GCGATCCTAGGGCGATCA,Start=1,End=18,	GGGGACCAGGTGCCGTAAGATAATGCATCAAAATAAGAACACTTAAACAAGCACGGTAGTGTTGGTACTCTGCCATCTATTTGTATGGATACTTTTTGAATTTTGATGTAACGGATTTCGGTAATGGGTCAGGCGATCCTAGGGCGATCA
610	610	0.3063	SetName|SetName=duplicate barcodes hubs pos neg#Context|Name=context_canon_term_neg_YPR170C#Barcode|Sequence=GGCTGAATTGC,Start=19,End=29,#Primer5|Sequence=GGGGACCAGGTGCCGTAAG,Start=132,End=150,#Primer3|Sequence=GCGATCCTAGGGCGATCA,Start=1,End=18,	GGGGACCAGGTGCCGTAAGTATTGTGGTGTTCTTTTCGATATTCTCAGATACCGTTTATTGTGCGCCATACCGATGGATGCAGAAATATCATTTAAATAGTTAAGCCAGGAAGTGGCTGAGGGCTGAATTGCGCGATCCTAGGGCGATCA
611	611	0.3339	SetName|SetName=duplicate barcodes hubs pos neg#Context|Name=context_canon_term_neg_YPR120C#Barcode|Sequence=CCCGCTTAGCA,Start=19,End=29,#Primer5|Sequence=GGGGACCAGGTGCCGTAAG,Start=132,End=150,#Primer3|Sequence=GCGATCCTAGGGCGATCA,Start=1,End=18,	GGGGACCAGGTGCCGTAAGATTAGTACTAGTAATGCTCATGAATTCGCATACTCTTTACATTTTCTTTTCTTTTTGCTGAACTAAAAGGAAAAAATTTTTTGCATCTATCTATCTATCTATCCCGCTTAGCAGCGATCCTAGGGCGATCA
612	612		SetName|SetName=duplicate barcodes hubs pos neg#Context|Name=context_canon_term_neg_YPL281C#Barcode|Sequence=AGACGAATGTG,Start=19,End=29,#Primer5|Sequence=GGGGACCAGGTGCCGTAAG,Start=132,End=150,#Primer3|Sequence=GCGATCCTAGGGCGATCA,Start=1,End=18,	GGGGACCAGGTGCCGTAAGAGGATTGTCTTGTTTCCTTTTTTTTTTTTTTTTTTTTTGTTTTTTTATGACTAAATAAAGTAAATCATATGAGGTTTTATTTTTTATTTCGTTGATTTGGGTAGACGAATGTGGCGATCCTAGGGCGATCA
613	613	4.8902	SetName|SetName=duplicate barcodes hubs pos neg#Context|Name=context_canon_term_pos_YAL016W#Barcode|Sequence=GCTACTTTGTA,Start=19,End=29,#Primer5|Sequence=GGGGACCAGGTGCCGTAAG,Start=132,End=150,#Primer3|Sequence=GCGATCCTAGGGCGATCA,Start=1,End=18,	GGGGACCAGGTGCCGTAAGTACTAGTTCAAATATATACATACATACACATATGTACACTTGAATGAATAAAAAGTATACATATTAACAACTAGGCCTGCTTTCTTTTCTTTTCTTTTTTTTGCTACTTTGTAGCGATCCTAGGGCGATCA
614	614	3.471	SetName|SetName=duplicate barcodes hubs pos neg#Context|Name=context_canon_term_pos_YAR007C#Barcode|Sequence=TCGAGCTTTCG,Start=19,End=29,#Primer5|Sequence=GGGGACCAGGTGCCGTAAG,Start=132,End=150,#Primer3|Sequence=GCGATCCTAGGGCGATCA,Start=1,End=18,	GGGGACCAGGTGCCGTAAGTGTATCAAATAATCAAGTACTATTTAATCTATGTAACATATGAGAAATGTAAAAAAAAAACTTCTATTTCGTCAAGTTTTTGAAGGGCGGTTCAGCATCTCTTCGAGCTTTCGGCGATCCTAGGGCGATCA
615	615	3.9776	SetName|SetName=duplicate barcodes hubs pos neg#Context|Name=context_canon_term_pos_YAL044C#Barcode|Sequence=GCTTCTGCAGA,Start=19,End=29,#Primer5|Sequence=GGGGACCAGGTGCCGTAAG,Start=132,End=150,#Primer3|Sequence=GCGATCCTAGGGCGATCA,Start=1,End=18,	GGGGACCAGGTGCCGTAAGACAAAGCTTATACGTACGTAAAGTAATTTCATATATATGTATATATATGTAGGGGAAATAAAACAATAAACTCAACGTGTACACTTATGCTTATGCATTCTAGCTTCTGCAGAGCGATCCTAGGGCGATCA
616	616	3.1754	SetName|SetName=duplicate barcodes hubs pos neg#Context|Name=context_canon_term_pos_YBR252W#Barcode|Sequence=TAGCTCACCAC,Start=19,End=29,#Primer5|Sequence=GGGGACCAGGTGCCGTAAG,Start=132,End=150,#Primer3|Sequence=GCGATCCTAGGGCGATCA,Start=1,End=18,	GGGGACCAGGTGCCGTAAGCTTAGTGTATATACTTTGGCACACTTGTATAATGTATAATAAAATCAGGATAAATCCAGTGTGACCCGGACTGAATTACTGAAACTTTGAAGTGTTAAGGAATAGCTCACCACGCGATCCTAGGGCGATCA
617	617	4.0164	SetName|SetName=duplicate barcodes hubs pos neg#Context|Name=context_canon_term_pos_YDR394W#Barcode|Sequence=CGATTTACGGT,Start=19,End=29,#Primer5|Sequence=GGGGACCAGGTGCCGTAAG,Start=132,End=150,#Primer3|Sequence=GCGATCCTAGGGCGATCA,Start=1,End=18,	GGGGACCAGGTGCCGTAAGTTACCATATATGCTTCAACGTAGGTCTACATAAAGTATTACGTACATTTCTATCTAGACAACACTAAATGAAATAAATACAGACGCCACTTTTTTATCACGTCGATTTACGGTGCGATCCTAGGGCGATCA
618	618	2.9049	SetName|SetName=duplicate barcodes hubs pos neg#Context|Name=context_canon_term_pos_YDR375C#Barcode|Sequence=AGTTCGCCCGC,Start=19,End=29,#Primer5|Sequence=GGGGACCAGGTGCCGTAAG,Start=132,End=150,#Primer3|Sequence=GCGATCCTAGGGCGATCA,Start=1,End=18,	GGGGACCAGGTGCCGTAAGGTGCTAAGTGGCGCCTTACTACATAACTTGTATATAATAAAAATTCAGAAGATGCTTTAACTTTTTCTCGTTAATAAGACCGAGTTATTTGCTATTACGAACAGTTCGCCCGCGCGATCCTAGGGCGATCA
619	619		SetName|SetName=duplicate barcodes hubs pos neg#Context|Name=context_canon_term_pos_YDR050C#Barcode|Sequence=AGAGATTAATC,Start=19,End=29,#Primer5|Sequence=GGGGACCAGGTGCCGTAAG,Start=132,End=150,#Primer3|Sequence=GCGATCCTAGGGCGATCA,Start=1,End=18,	GGGGACCAGGTGCCGTAAGGATTAATATAATTATATAAAAATATTATCTTCTTTTCTTTATATCTAGTGTTATGTAAAATAAATTGATGACTACGGAAAGCTTTTTTATATTGTTTCTTTTAGAGATTAATCGCGATCCTAGGGCGATCA
620	620	2.0695	SetName|SetName=duplicate barcodes hubs pos neg#Context|Name=context_canon_term_pos_YDL044C#Barcode|Sequence=TGTCAAGCAGA,Start=19,End=29,#Primer5|Sequence=GGGGACCAGGTGCCGTAAG,Start=132,End=150,#Primer3|Sequence=GCGATCCTAGGGCGATCA,Start=1,End=18,	GGGGACCAGGTGCCGTAAGAAAATTATTCAAACCTTGTAAATAGTGTTATATATATGTGTTAGACTTAAAAGCGCTAATAAACGTTCCTGCTCGCATTTAACTTCTGTTCCAATTTTCCTATGTCAAGCAGAGCGATCCTAGGGCGATCA
621	621	1.3158	SetName|SetName=duplicate barcodes hubs pos neg#Context|Name=context_canon_term_pos_YDL227C#Barcode|Sequence=CACTCCCAGGC,Start=19,End=29,#Primer5|Sequence=GGGGACCAGGTGCCGTAAG,Start=132,End=150,#Primer3|Sequence=GCGATCCTAGGGCGATCA,Start=1,End=18,	GGGGACCAGGTGCCGTAAGAATGTGTATATTAGTTTAAAAAGTTGTATGTAATAAAAGTAAAATTTAATATTTTGGATGAAAAAAACCATTTTTAGACTTTTTCTTAACTAGAATGCTGGACACTCCCAGGCGCGATCCTAGGGCGATCA
622	622	4.7072	SetName|SetName=duplicate barcodes hubs pos neg#Context|Name=context_canon_term_pos_YEL059C_A#Barcode|Sequence=ACAGGTGCCAC,Start=19,End=29,#Primer5|Sequence=GGGGACCAGGTGCCGTAAG,Start=132,End=150,#Primer3|Sequence=GCGATCCTAGGGCGATCA,Start=1,End=18,	GGGGACCAGGTGCCGTAAGAAATTACATATACTCTATATAGCACAGTAGTGTGATAAATAAAAAATTTTGCCAAGACTTTTTTAAACTGCACCCGACAGATCAGGTCTGTGCCTACTATGCACAGGTGCCACGCGATCCTAGGGCGATCA
623	623	4.8054	SetName|SetName=duplicate barcodes hubs pos neg#Context|Name=context_canon_term_pos_YFL009W#Barcode|Sequence=TAATCCAACGA,Start=19,End=29,#Primer5|Sequence=GGGGACCAGGTGCCGTAAG,Start=132,End=150,#Primer3|Sequence=GCGATCCTAGGGCGATCA,Start=1,End=18,	GGGGACCAGGTGCCGTAAGCCTTTCCCAGAGAATAAGCATTGACTCATACTTAGATAATATAGCTTAATAAGTAGTTATATAATCAGTAAAAAAGTACAATAACAACTTCGTACATTTTATTAATCCAACGAGCGATCCTAGGGCGATCA
624	624	3.9034	SetName|SetName=duplicate barcodes hubs pos neg#Context|Name=context_canon_term_pos_YFR039C#Barcode|Sequence=CTTGTGAAAGC,Start=19,End=29,#Primer5|Sequence=GGGGACCAGGTGCCGTAAG,Start=132,End=150,#Primer3|Sequence=GCGATCCTAGGGCGATCA,Start=1,End=18,	GGGGACCAGGTGCCGTAAGTCAATATATAGGTATGTATATGTACATATATACAAACATTTAATAAAAACAATATTGTATGATAACCAAGTTAAAGACCGGAGGTTGTTTCAAATAGCTTGACTTGTGAAAGCGCGATCCTAGGGCGATCA
625	625	3.0931	SetName|SetName=duplicate barcodes hubs pos neg#Context|Name=context_canon_term_pos_YGR166W#Barcode|Sequence=ACGTCGTGCCG,Start=19,End=29,#Primer5|Sequence=GGGGACCAGGTGCCGTAAG,Start=132,End=150,#Primer3|Sequence=GCGATCCTAGGGCGATCA,Start=1,End=18,	GGGGACCAGGTGCCGTAAGGCGGAACAAGTATACATTTTATTAACATAGACTACATACTAATCTGTAACATTTCTATAAAAAAGTTATTATCATCACATTACACGATAGAAACACTTCCATACGTCGTGCCGGCGATCCTAGGGCGATCA
626	626	2.7077	SetName|SetName=duplicate barcodes hubs pos neg#Context|Name=context_canon_term_pos_YHR200W#Barcode|Sequence=TAAGATCGCTT,Start=19,End=29,#Primer5|Sequence=GGGGACCAGGTGCCGTAAG,Start=132,End=150,#Primer3|Sequence=GCGATCCTAGGGCGATCA,Start=1,End=18,	GGGGACCAGGTGCCGTAAGTAGTGTACAAAAATATCTATATGGGTCATATATAAACCAAATAAAGCATATATAACATCTCCCTTCACTCTTCCAGGTTTGAGTACGCTTCCTCTAAATAGGTAAGATCGCTTGCGATCCTAGGGCGATCA
627	627	2.7807	SetName|SetName=duplicate barcodes hubs pos neg#Context|Name=context_canon_term_pos_YIR021W#Barcode|Sequence=CCATAGCCTCA,Start=19,End=29,#Primer5|Sequence=GGGGACCAGGTGCCGTAAG,Start=132,End=150,#Primer3|Sequence=GCGATCCTAGGGCGATCA,Start=1,End=18,	GGGGACCAGGTGCCGTAAGTCCTCTTATATAGCATGTAAATAGAAAGTACGTAAAAAAAAGCTACTATTGACTTTATTCTCCGTGAGGGCGGTTCTTTCTGTAGCTGTTGGTTTTTTCCAGCCATAGCCTCAGCGATCCTAGGGCGATCA
628	628	3.4166	SetName|SetName=duplicate barcodes hubs pos neg#Context|Name=context_canon_term_pos_YIR035C#Barcode|Sequence=ATTGCGACACT,Start=19,End=29,#Primer5|Sequence=GGGGACCAGGTGCCGTAAG,Start=132,End=150,#Primer3|Sequence=GCGATCCTAGGGCGATCA,Start=1,End=18,	GGGGACCAGGTGCCGTAAGGGATAGCAGGTACATATAAATTGTTACATACTAAGTCGATGAGTCAAAAAAGACTCTTATACATTTATACATTTTGCATTATTATTTTTTTTTTCCAGCGGAATTGCGACACTGCGATCCTAGGGCGATCA
629	629	3.8676	SetName|SetName=duplicate barcodes hubs pos neg#Context|Name=context_canon_term_pos_YIL115C#Barcode|Sequence=CTTACAAACGT,Start=19,End=29,#Primer5|Sequence=GGGGACCAGGTGCCGTAAG,Start=132,End=150,#Primer3|Sequence=GCGATCCTAGGGCGATCA,Start=1,End=18,	GGGGACCAGGTGCCGTAAGTGATATTTAGCTATATGTACGTTGTTAGTGCCGTTAATAATAAATTCATCCTCTATCATAGAAACAGGGCATGAGAAACGAAGAAAAATTGATATTGTAACACTTACAAACGTGCGATCCTAGGGCGATCA
630	630	3.8974	SetName|SetName=duplicate barcodes hubs pos neg#Context|Name=context_canon_term_pos_YJL050W#Barcode|Sequence=CCAGCTGAAAA,Start=19,End=29,#Primer5|Sequence=GGGGACCAGGTGCCGTAAG,Start=132,End=150,#Primer3|Sequence=GCGATCCTAGGGCGATCA,Start=1,End=18,	GGGGACCAGGTGCCGTAAGTTAATCACACACAATTATGTATTTTTATTGGTATATATAATAAACAAATAGATTTCATCAACATTTATTATATAATAACATTTTTGTTTGGGCAAGCACACTCCAGCTGAAAAGCGATCCTAGGGCGATCA
631	631	3.7316	SetName|SetName=duplicate barcodes hubs pos neg#Context|Name=context_canon_term_pos_YJR100C#Barcode|Sequence=GAAGCTCGTCT,Start=19,End=29,#Primer5|Sequence=GGGGACCAGGTGCCGTAAG,Start=132,End=150,#Primer3|Sequence=GCGATCCTAGGGCGATCA,Start=1,End=18,	GGGGACCAGGTGCCGTAAGGTGAATTATATATTTAAAAGAATTCTGTAAATACATATTTGACTACGCAGTAATAAAACAATTATTATTCCCAATTAGGGCCCAATCCTAGCATAGCAAAGTGAAGCTCGTCTGCGATCCTAGGGCGATCA
632	632	2.4804	SetName|SetName=duplicate barcodes hubs pos neg#Context|Name=context_canon_term_pos_YJL204C#Barcode|Sequence=ATGAGAGTAAA,Start=19,End=29,#Primer5|Sequence=GGGGACCAGGTGCCGTAAG,Start=132,End=150,#Primer3|Sequence=GCGATCCTAGGGCGATCA,Start=1,End=18,	GGGGACCAGGTGCCGTAAGATTCCTATCAATGATTAATTATATTACTCTATATAGGTATGAAGTGCGGAAATAAAAGACTGTTCACATATTAGATTATTCAAGATTACGCGGGCTCTATTTATGAGAGTAAAGCGATCCTAGGGCGATCA
633	633	2.5726	SetName|SetName=duplicate barcodes hubs pos neg#Context|Name=context_canon_term_pos_YLR064W#Barcode|Sequence=CTTCACAGACC,Start=19,End=29,#Primer5|Sequence=GGGGACCAGGTGCCGTAAG,Start=132,End=150,#Primer3|Sequence=GCGATCCTAGGGCGATCA,Start=1,End=18,	GGGGACCAGGTGCCGTAAGCATGCTCATTTTAAGTATATCTAAATATTATTTTGTATATACTCACACTCCTCTATAGAAAGCAAAAAATTTCAAAAACGTTTGAAAAGCTTTGTTTAACGACTTCACAGACCGCGATCCTAGGGCGATCA
634	634	2.2458	SetName|SetName=duplicate barcodes hubs pos neg#Context|Name=context_canon_term_pos_YLR298C#Barcode|Sequence=ACCTAGCATGT,Start=19,End=29,#Primer5|Sequence=GGGGACCAGGTGCCGTAAG,Start=132,End=150,#Primer3|Sequence=GCGATCCTAGGGCGATCA,Start=1,End=18,	GGGGACCAGGTGCCGTAAGCGCTATCAGATTAGATTATTAAATATTATATGTAGACTATATTTTGCCAAAAAAAACAATAGAGATATCAACAACGAATGAAAATGGTATGATGAGAATAAAACCTAGCATGTGCGATCCTAGGGCGATCA
635	635	5.2205	SetName|SetName=duplicate barcodes hubs pos neg#Context|Name=context_canon_term_pos_YLR272C#Barcode|Sequence=GCAGCTGCGTG,Start=19,End=29,#Primer5|Sequence=GGGGACCAGGTGCCGTAAG,Start=132,End=150,#Primer3|Sequence=GCGATCCTAGGGCGATCA,Start=1,End=18,	GGGGACCAGGTGCCGTAAGTCGAACTGACGTTTACCCGTTTCTTCCGTTTTATATTATATGTTATTATATAAATAAAAGCTGTTCATTTCTTTCTTCTTGAAATATGACTTTACCTATCTCGCAGCTGCGTGGCGATCCTAGGGCGATCA
636	636	4.4734	SetName|SetName=duplicate barcodes hubs pos neg#Context|Name=context_canon_term_pos_YNR049C#Barcode|Sequence=TGAGCTTGACG,Start=19,End=29,#Primer5|Sequence=GGGGACCAGGTGCCGTAAG,Start=132,End=150,#Primer3|Sequence=GCGATCCTAGGGCGATCA,Start=1,End=18,	GGGGACCAGGTGCCGTAAGATAGCACTATACCTTGCTGAAATAAAGCGAAAAGAACATTTAATGAATATATAGGTATCGTATATGTACTGAATAAAGTGTTTGATACAGAATGCAAGGAGATGAGCTTGACGGCGATCCTAGGGCGATCA
637	637	2.1392	SetName|SetName=duplicate barcodes hubs pos neg#Context|Name=context_canon_term_pos_YNL011C#Barcode|Sequence=CTGCGTCCCAC,Start=19,End=29,#Primer5|Sequence=GGGGACCAGGTGCCGTAAG,Start=132,End=150,#Primer3|Sequence=GCGATCCTAGGGCGATCA,Start=1,End=18,	GGGGACCAGGTGCCGTAAGTGCAACTATGTCGCTCATTAACGGTTATTATAGTGAAGACTACATAATAAAGACATAGATAATAAAAAAGAATCGCGTTTGAACCATGTTTTATTTAACCATCTGCGTCCCACGCGATCCTAGGGCGATCA
638	638	1.583	SetName|SetName=duplicate barcodes hubs pos neg#Context|Name=context_canon_term_pos_YNL231C#Barcode|Sequence=TTACATGGGAG,Start=19,End=29,#Primer5|Sequence=GGGGACCAGGTGCCGTAAG,Start=132,End=150,#Primer3|Sequence=GCGATCCTAGGGCGATCA,Start=1,End=18,	GGGGACCAGGTGCCGTAAGAGGCAAATTTAGATAGATAATGATAATGCACTATAATATATAATAAATAAAAGAGAATAAAAAGTTTAATCACGTTCCCGCTTCTTTTTCCTAACCATCAAATTACATGGGAGGCGATCCTAGGGCGATCA
639	639	1.99	SetName|SetName=duplicate barcodes hubs pos neg#Context|Name=context_canon_term_pos_YOL009C#Barcode|Sequence=AAGACGTAATT,Start=19,End=29,#Primer5|Sequence=GGGGACCAGGTGCCGTAAG,Start=132,End=150,#Primer3|Sequence=GCGATCCTAGGGCGATCA,Start=1,End=18,	GGGGACCAGGTGCCGTAAGTTTAACAAAGATAGTTTGAAAATAGTGTCTACATAAAAAAACAAACATTTTTGAGCTGGAAAATTATATTTTGTCATGAAGTAATCTATTCTTAACGCGCTTAAGACGTAATTGCGATCCTAGGGCGATCA
640	640	3.3742	SetName|SetName=duplicate barcodes hubs pos neg#Context|Name=context_canon_term_pos_YOL073C#Barcode|Sequence=GTTACCCTTAG,Start=19,End=29,#Primer5|Sequence=GGGGACCAGGTGCCGTAAG,Start=132,End=150,#Primer3|Sequence=GCGATCCTAGGGCGATCA,Start=1,End=18,	GGGGACCAGGTGCCGTAAGTTTATATCAGCATATACCTACATAAACAAATAAACATAGCAACGGTTTAGCAACATCGTTTACAGCCATGTGAGGCAGTTACTTCTATCATATGTCTGGCTTGTTACCCTTAGGCGATCCTAGGGCGATCA
641	641	4.7117	SetName|SetName=duplicate barcodes hubs pos neg#Context|Name=context_canon_term_pos_YPL006W#Barcode|Sequence=CTGTCCTTCAG,Start=19,End=29,#Primer5|Sequence=GGGGACCAGGTGCCGTAAG,Start=132,End=150,#Primer3|Sequence=GCGATCCTAGGGCGATCA,Start=1,End=18,	GGGGACCAGGTGCCGTAAGCCATAGCAGATTATACTATATTTTACGTAGTGAAAAAATAGGTAAAAATTCGTTAATTATTCTGATGCCACACCAGAAAATCTGTGGGAAAATTTTTCGAGTCTGTCCTTCAGGCGATCCTAGGGCGATCA
642	642	0.5804	SetName|SetName=duplicate barcodes hubs pos neg#Context|Name=context_canon_term_neg_YBL097W#Barcode|Sequence=ACTAATGTCGT,Start=19,End=29,#Primer5|Sequence=GGGGACCAGGTGCCGTAAG,Start=132,End=150,#Primer3|Sequence=GCGATCCTAGGGCGATCA,Start=1,End=18,	GGGGACCAGGTGCCGTAAGTTGATGATCTTTTTTTTTTTTTTTTTTTTTTTTTTTGTGCTGCAAAGTTTCTTAAAGCCTTCGGGCTTACGAAATCCTTTATCGCCGAAAGGGGACCGCTTCACTAATGTCGTGCGATCCTAGGGCGATCA
643	643	4.8677	SetName|SetName=duplicate barcodes hubs pos neg#Context|Name=context_canon_term_neg_YBL075C#Barcode|Sequence=AACATTAGTCC,Start=19,End=29,#Primer5|Sequence=GGGGACCAGGTGCCGTAAG,Start=132,End=150,#Primer3|Sequence=GCGATCCTAGGGCGATCA,Start=1,End=18,	GGGGACCAGGTGCCGTAAGTTATTCTTCTATAGTGTTCTATTTAGCTACTTTTTATGTTTAACCTTTTATACGATGGCGGGTAATCTATCCATGATGACGAAAAATTTTTTTTTTTTTTGTAACATTAGTCCGCGATCCTAGGGCGATCA
644	644	3.3892	SetName|SetName=duplicate barcodes hubs pos neg#Context|Name=context_canon_term_neg_YBL088C#Barcode|Sequence=CACCCAGTTAG,Start=19,End=29,#Primer5|Sequence=GGGGACCAGGTGCCGTAAG,Start=132,End=150,#Primer3|Sequence=GCGATCCTAGGGCGATCA,Start=1,End=18,	GGGGACCAGGTGCCGTAAGTTGCTATGCAGATGCTTTATACTTCTTTTTTTTGTTTATAGAAATACGAAAAGTAATGTACAAACTCAATGTGATGATGTGCCCAAAAATACAATCGCTGATCACCCAGTTAGGCGATCCTAGGGCGATCA
645	645	2.3253	SetName|SetName=duplicate barcodes hubs pos neg#Context|Name=context_canon_term_neg_YCR032W#Barcode|Sequence=ACAGAGATATT,Start=19,End=29,#Primer5|Sequence=GGGGACCAGGTGCCGTAAG,Start=132,End=150,#Primer3|Sequence=GCGATCCTAGGGCGATCA,Start=1,End=18,	GGGGACCAGGTGCCGTAAGGCATCACATCGTAACGCCTTTCTTTAAATGATTCAATTTTTGTAGTTTATATCTTTACTTTTGAAACTGATTTCTCATCCCATCTAGTATTGTAATTGCGTAACAGAGATATTGCGATCCTAGGGCGATCA
646	646	0.5786	SetName|SetName=duplicate barcodes hubs pos neg#Context|Name=context_canon_term_neg_YDR325W#Barcode|Sequence=ACCATATCGAC,Start=19,End=29,#Primer5|Sequence=GGGGACCAGGTGCCGTAAG,Start=132,End=150,#Primer3|Sequence=GCGATCCTAGGGCGATCA,Start=1,End=18,	GGGGACCAGGTGCCGTAAGAATTGATATGCGAGCTCTTCATCTATTTAAGTTGATTTTTTGGTTGTAAACATATTTGTATTTTATTCTTAGGTTTGTTAATTCTTCTACGCTTACCAGATAACCATATCGACGCGATCCTAGGGCGATCA
647	647		SetName|SetName=duplicate barcodes hubs pos neg#Context|Name=context_canon_term_neg_YDR457W#Barcode|Sequence=CTACAGTGAGC,Start=19,End=29,#Primer5|Sequence=GGGGACCAGGTGCCGTAAG,Start=132,End=150,#Primer3|Sequence=GCGATCCTAGGGCGATCA,Start=1,End=18,	GGGGACCAGGTGCCGTAAGTCATTTTTCGTGTAAATTTATAGCGCCATGTAACCAAGTATTTTAGAACGTCTTTTATTTAAACCTTTAACCATACAACACTTGCCCAAGGAAGAGGAACAGCTACAGTGAGCGCGATCCTAGGGCGATCA
648	648	0.4981	SetName|SetName=duplicate barcodes hubs pos neg#Context|Name=context_canon_term_neg_YDL205C#Barcode|Sequence=TACGACTAAAG,Start=19,End=29,#Primer5|Sequence=GGGGACCAGGTGCCGTAAG,Start=132,End=150,#Primer3|Sequence=GCGATCCTAGGGCGATCA,Start=1,End=18,	GGGGACCAGGTGCCGTAAGACACCATTAATTTGATCAGTCCAAAAACTCTATTATTACTAACTAAAGTTCCCTTTTTTTTTTTTTTTTTTTTTTTTTTCCTTATCTCCTTTATCTTTCAGTTACGACTAAAGGCGATCCTAGGGCGATCA
649	649		SetName|SetName=duplicate barcodes hubs pos neg#Context|Name=context_canon_term_neg_YER013W#Barcode|Sequence=CGTTGTGAACT,Start=19,End=29,#Primer5|Sequence=GGGGACCAGGTGCCGTAAG,Start=132,End=150,#Primer3|Sequence=GCGATCCTAGGGCGATCA,Start=1,End=18,	GGGGACCAGGTGCCGTAAGCATTGTTAGCTTTTTATGCATTATAATTATCGAGTTTTATAGACCTATATTTAATTTTTTAACAACTTTATCTCTCTTGAGAATTTTTACATGAAAAAAATCCGTTGTGAACTGCGATCCTAGGGCGATCA
650	650	2.0884	SetName|SetName=duplicate barcodes hubs pos neg#Context|Name=context_canon_term_neg_YFL054C#Barcode|Sequence=GCTTAACCTGC,Start=19,End=29,#Primer5|Sequence=GGGGACCAGGTGCCGTAAG,Start=132,End=150,#Primer3|Sequence=GCGATCCTAGGGCGATCA,Start=1,End=18,	GGGGACCAGGTGCCGTAAGTTAATATTTTCAATTTTTTACGATTTATAACCTAATTATTAATTTCACGAACTTATTATTTGACGACATACTACATCCGGGAGCCGTGACTTTGTTACCATCGCTTAACCTGCGCGATCCTAGGGCGATCA
651	651	0.562	SetName|SetName=duplicate barcodes hubs pos neg#Context|Name=context_canon_term_neg_YGR126W#Barcode|Sequence=TACAAGGCGAC,Start=19,End=29,#Primer5|Sequence=GGGGACCAGGTGCCGTAAG,Start=132,End=150,#Primer3|Sequence=GCGATCCTAGGGCGATCA,Start=1,End=18,	GGGGACCAGGTGCCGTAAGGTGGCATAGCAACATTTAGTTCGCAATGCGTTTACTTCAGAATCATTCTTTTTTTTTTTTTTTTTTTTTTTTTGCCTCACATTATATTCTTGGCATCTGCCTTACAAGGCGACGCGATCCTAGGGCGATCA
652	652	1.73	SetName|SetName=duplicate barcodes hubs pos neg#Context|Name=context_canon_term_neg_YGL194C#Barcode|Sequence=TAAACCTGAAG,Start=19,End=29,#Primer5|Sequence=GGGGACCAGGTGCCGTAAG,Start=132,End=150,#Primer3|Sequence=GCGATCCTAGGGCGATCA,Start=1,End=18,	GGGGACCAGGTGCCGTAAGTTTAAGAGTTTGCTATTCGGTTAATCTCCCGTTTTTTTTTTTTTTTTTTTTTTTATTTTCCTTTTTTTTTTTTTAATGTTTTTAGCATATTATGTAGAGTGTTAAACCTGAAGGCGATCCTAGGGCGATCA
653	653	0.6276	SetName|SetName=duplicate barcodes hubs pos neg#Context|Name=context_canon_term_neg_YHL030W_A#Barcode|Sequence=CTGTCTCAAAA,Start=19,End=29,#Primer5|Sequence=GGGGACCAGGTGCCGTAAG,Start=132,End=150,#Primer3|Sequence=GCGATCCTAGGGCGATCA,Start=1,End=18,	GGGGACCAGGTGCCGTAAGTTTATTTTTTCCTTGTCTTTTTATCTCTTTTTTTTTGTTTTTCGTTCTCTTTATTTTCAACAACGCCTAGAAAATTTGGTTACCAACCACACTATTGAACAACTGTCTCAAAAGCGATCCTAGGGCGATCA
654	654	0.8224	SetName|SetName=duplicate barcodes hubs pos neg#Context|Name=context_canon_term_neg_YIL054W#Barcode|Sequence=AAGTCGACTAG,Start=19,End=29,#Primer5|Sequence=GGGGACCAGGTGCCGTAAG,Start=132,End=150,#Primer3|Sequence=GCGATCCTAGGGCGATCA,Start=1,End=18,	GGGGACCAGGTGCCGTAAGTGATGTGTGAGTTCCTCTTTTCTTTTTTTCTTTTCTTTTTTCCTTTTTTTTTCTTTTCTTACTCTGTTAATCACTTTCTTTCCTTTTTGTTCATATTGTCGTAAGTCGACTAGGCGATCCTAGGGCGATCA
655	655	0.3626	SetName|SetName=duplicate barcodes hubs pos neg#Context|Name=context_canon_term_neg_YIL084C#Barcode|Sequence=CTGAGGCTCAG,Start=19,End=29,#Primer5|Sequence=GGGGACCAGGTGCCGTAAG,Start=132,End=150,#Primer3|Sequence=GCGATCCTAGGGCGATCA,Start=1,End=18,	GGGGACCAGGTGCCGTAAGTTTATTTTATGCTGCAAACCTTCCACTTTAACTTTGTATTATATTACATTAGATGGTTATATTTCAATGTGAGCTCTTTTTGTTTTTGCTTTCTTTTCTCGGCTGAGGCTCAGGCGATCCTAGGGCGATCA
656	656	0.4258	SetName|SetName=duplicate barcodes hubs pos neg#Context|Name=context_canon_term_neg_YIL105C#Barcode|Sequence=CAAACAGCTCG,Start=19,End=29,#Primer5|Sequence=GGGGACCAGGTGCCGTAAG,Start=132,End=150,#Primer3|Sequence=GCGATCCTAGGGCGATCA,Start=1,End=18,	GGGGACCAGGTGCCGTAAGATACAAGTATAGTAAACTAGAATGTTTTTATTTCCTTCCATCCATATGTTATATTAATATGTTTCCGTATTTTTGTTTTTGTGTCCCATGCATGGAAGAATACAAACAGCTCGGCGATCCTAGGGCGATCA
657	657	2.5061	SetName|SetName=duplicate barcodes hubs pos neg#Context|Name=context_canon_term_neg_YKL143W#Barcode|Sequence=GATTGTGGACA,Start=19,End=29,#Primer5|Sequence=GGGGACCAGGTGCCGTAAG,Start=132,End=150,#Primer3|Sequence=GCGATCCTAGGGCGATCA,Start=1,End=18,	GGGGACCAGGTGCCGTAAGAGGAGTAGAATGAGATGAGAAAGCACCTACATTACAAGTACTGTGTAGACATGTATACTTAGCCTAGAATGCATTGATGCTAAAATACATCCTGCCCACCGGGATTGTGGACAGCGATCCTAGGGCGATCA
658	658		SetName|SetName=duplicate barcodes hubs pos neg#Context|Name=context_canon_term_neg_YLR450W#Barcode|Sequence=GCCCAGTATTG,Start=19,End=29,#Primer5|Sequence=GGGGACCAGGTGCCGTAAG,Start=132,End=150,#Primer3|Sequence=GCGATCCTAGGGCGATCA,Start=1,End=18,	GGGGACCAGGTGCCGTAAGCTCTTGTAGTTTACATGGTGATACTTTATATCTTTGTATTGTCTAGCTATTCTAAATCATCTGCATGTAATAAGAAGTTGATCAAAATGACTCGCTGCGTAAGCCCAGTATTGGCGATCCTAGGGCGATCA
659	659	4.0653	SetName|SetName=duplicate barcodes hubs pos neg#Context|Name=context_canon_term_neg_YLR277C#Barcode|Sequence=TACAACGGTCG,Start=19,End=29,#Primer5|Sequence=GGGGACCAGGTGCCGTAAG,Start=132,End=150,#Primer3|Sequence=GCGATCCTAGGGCGATCA,Start=1,End=18,	GGGGACCAGGTGCCGTAAGAAACAGTTACGCATACTAAGTAGACTACTTTATAGAAGTAATACCAAACCAAAATCTGGTTAGAACTGCCTTTTATTGTTTACCTTAATCACTCTTTACGTATACAACGGTCGGCGATCCTAGGGCGATCA
660	660	0.8736	SetName|SetName=duplicate barcodes hubs pos neg#Context|Name=context_canon_term_neg_YLR055C#Barcode|Sequence=CCCTCTAAATC,Start=19,End=29,#Primer5|Sequence=GGGGACCAGGTGCCGTAAG,Start=132,End=150,#Primer3|Sequence=GCGATCCTAGGGCGATCA,Start=1,End=18,	GGGGACCAGGTGCCGTAAGTGAGTTGTAATAATAATCATAACCATAATCATAATCATAATTACTCCGCGCGCCGTTTATTTTTTTTTTTTTTTTTTCAGGGCCACTGATCCCTTCATTTTGCCCTCTAAATCGCGATCCTAGGGCGATCA
661	661	0.6533	SetName|SetName=duplicate barcodes hubs pos neg#Context|Name=context_canon_term_neg_YLL013C#Barcode|Sequence=CAGGTCACTTG,Start=19,End=29,#Primer5|Sequence=GGGGACCAGGTGCCGTAAG,Start=132,End=150,#Primer3|Sequence=GCGATCCTAGGGCGATCA,Start=1,End=18,	GGGGACCAGGTGCCGTAAGTTAGTGTTATCATCGTTCTCCTTTCACTTTTTACTATTTTTTTTTTTTTTTTTTTTTTTTTTTTTTCCTCCATTTGTCTTTCACTTACTCTATTTTATTTTGCAGGTCACTTGGCGATCCTAGGGCGATCA
662	662		SetName|SetName=duplicate barcodes hubs pos neg#Context|Name=context_canon_term_neg_YLL019C#Barcode|Sequence=TGAACCTAATG,Start=19,End=29,#Primer5|Sequence=GGGGACCAGGTGCCGTAAG,Start=132,End=150,#Primer3|Sequence=GCGATCCTAGGGCGATCA,Start=1,End=18,	GGGGACCAGGTGCCGTAAGTGGGTGTTCTCGTTCTACTTTTCTCTTCTTTTTTTCACATCTTTTACTAGTTCCGTTTTTTTTTTTTTTAACTCTTCTTTTTCATTTTCCGGTTTTTAATAATGAACCTAATGGCGATCCTAGGGCGATCA
663	663	2.4559	SetName|SetName=duplicate barcodes hubs pos neg#Context|Name=context_canon_term_neg_YMR323W#Barcode|Sequence=TGTGCAGCCCT,Start=19,End=29,#Primer5|Sequence=GGGGACCAGGTGCCGTAAG,Start=132,End=150,#Primer3|Sequence=GCGATCCTAGGGCGATCA,Start=1,End=18,	GGGGACCAGGTGCCGTAAGAGGATTGTCTTGTTTCCTTTTTTTTTTTTTTGTTTTTTTATGACTAAATAAAGTAAATCATATGAGGTTTTATTTTTTATTTCGTTGATTTGGGTTACAGTATGTGCAGCCCTGCGATCCTAGGGCGATCA
664	664	1.2572	SetName|SetName=duplicate barcodes hubs pos neg#Context|Name=context_canon_term_neg_YNL086W#Barcode|Sequence=GTCGCATGCAA,Start=19,End=29,#Primer5|Sequence=GGGGACCAGGTGCCGTAAG,Start=132,End=150,#Primer3|Sequence=GCGATCCTAGGGCGATCA,Start=1,End=18,	GGGGACCAGGTGCCGTAAGGTAAACATACACATGTATAGCATAATCTTCGATTCCTTTTACCCATTCGTAGATGGCATCGACAGTGTACTTATAATACTACCGTGAGAAACGATATTAAGAGTCGCATGCAAGCGATCCTAGGGCGATCA
665	665		SetName|SetName=duplicate barcodes hubs pos neg#Context|Name=context_canon_term_neg_YNR041C#Barcode|Sequence=CGTTGCGAGGA,Start=19,End=29,#Primer5|Sequence=GGGGACCAGGTGCCGTAAG,Start=132,End=150,#Primer3|Sequence=GCGATCCTAGGGCGATCA,Start=1,End=18,	GGGGACCAGGTGCCGTAAGATATAGCGTGCATATACAAGTGTTTAATTGTTCTTTTATTCGATTATTATTTACATGCATTCTTACGTAGATGTCCGTACCTATTTGGGCTTCACGATATTCCGTTGCGAGGAGCGATCCTAGGGCGATCA
666	666	4.6974	SetName|SetName=duplicate barcodes hubs pos neg#Context|Name=context_canon_term_neg_YOR390W#Barcode|Sequence=TAGTGTACGGG,Start=19,End=29,#Primer5|Sequence=GGGGACCAGGTGCCGTAAG,Start=132,End=150,#Primer3|Sequence=GCGATCCTAGGGCGATCA,Start=1,End=18,	GGGGACCAGGTGCCGTAAGGATCTTTTCTTTATACTTTTCCCTGCATAATCATCCCACTTTTTTTTTTTTTTTTTTTAATTCATTTTCAAGATTTTAGACGTTGTATAATACATTTTTACCTAGTGTACGGGGCGATCCTAGGGCGATCA
667	667	3.9754	SetName|SetName=duplicate barcodes hubs pos neg#Context|Name=context_canon_term_neg_YOR393W#Barcode|Sequence=GGCTAGTGTAT,Start=19,End=29,#Primer5|Sequence=GGGGACCAGGTGCCGTAAG,Start=132,End=150,#Primer3|Sequence=GCGATCCTAGGGCGATCA,Start=1,End=18,	GGGGACCAGGTGCCGTAAGAGGATTGTCTTGTTTCCTTTTTTTTTTTTTTTTTTTTGTTTTTTTATGACTAAATAAAGTAAATCATATGAGGTTTTATTTTTTATTTCGTTGATTTGGGTTGGCTAGTGTATGCGATCCTAGGGCGATCA
668	668	3.1407	SetName|SetName=duplicate barcodes hubs pos neg#Context|Name=context_canon_term_neg_YOL124C#Barcode|Sequence=ATGGACAAGTT,Start=19,End=29,#Primer5|Sequence=GGGGACCAGGTGCCGTAAG,Start=132,End=150,#Primer3|Sequence=GCGATCCTAGGGCGATCA,Start=1,End=18,	GGGGACCAGGTGCCGTAAGAATGATGCATAAGCCCTTTGTAATTTTAAGATATATTTACTTACTCTTTCTCTTAAAGAAAAAAAAAAAAAAAGAAGAACAATTTATCTATACCTATATTTAATGGACAAGTTGCGATCCTAGGGCGATCA
669	669		SetName|SetName=duplicate barcodes hubs pos neg#Context|Name=context_canon_term_neg_YPR172W#Barcode|Sequence=TCACGATCTTG,Start=19,End=29,#Primer5|Sequence=GGGGACCAGGTGCCGTAAG,Start=132,End=150,#Primer3|Sequence=GCGATCCTAGGGCGATCA,Start=1,End=18,	GGGGACCAGGTGCCGTAAGCTGTCCTCTGCTTTTCTTTATCTATTTTGCATACGATTCTGTATTTAATTATTCTGTTTTTTTTTTTTTTTTATTTTTTATTTTCATGTACACAAGAAATCTTCACGATCTTGGCGATCCTAGGGCGATCA
670	670		SetName|SetName=duplicate barcodes hubs pos neg#Context|Name=context_canon_term_neg_YPR175W#Barcode|Sequence=TCAGCCCGAAA,Start=19,End=29,#Primer5|Sequence=GGGGACCAGGTGCCGTAAG,Start=132,End=150,#Primer3|Sequence=GCGATCCTAGGGCGATCA,Start=1,End=18,	GGGGACCAGGTGCCGTAAGATAATGCATCAAAATAAGAACACTTAAACAAGCACGGTAGTGTTGGTACTCTGCCATCTATTTGTATGGATACTTTTTGAATTTTGATGTAACGGATTTCGGTCAGCCCGAAAGCGATCCTAGGGCGATCA
671	671	3.2361	SetName|SetName=duplicate barcodes hubs pos neg#Context|Name=context_canon_term_neg_YPR170C#Barcode|Sequence=CGGTTGTCTAA,Start=19,End=29,#Primer5|Sequence=GGGGACCAGGTGCCGTAAG,Start=132,End=150,#Primer3|Sequence=GCGATCCTAGGGCGATCA,Start=1,End=18,	GGGGACCAGGTGCCGTAAGTATTGTGGTGTTCTTTTCGATATTCTCAGATACCGTTTATTGTGCGCCATACCGATGGATGCAGAAATATCATTTAAATAGTTAAGCCAGGAAGTGGCTGAGCGGTTGTCTAAGCGATCCTAGGGCGATCA
672	672	0.2824	SetName|SetName=duplicate barcodes hubs pos neg#Context|Name=context_canon_term_neg_YPR120C#Barcode|Sequence=GGTTACAGTGG,Start=19,End=29,#Primer5|Sequence=GGGGACCAGGTGCCGTAAG,Start=132,End=150,#Primer3|Sequence=GCGATCCTAGGGCGATCA,Start=1,End=18,	GGGGACCAGGTGCCGTAAGATTAGTACTAGTAATGCTCATGAATTCGCATACTCTTTACATTTTCTTTTCTTTTTGCTGAACTAAAAGGAAAAAATTTTTTGCATCTATCTATCTATCTATGGTTACAGTGGGCGATCCTAGGGCGATCA
673	673	4.0168	SetName|SetName=duplicate barcodes hubs pos neg#Context|Name=context_canon_term_neg_YPL281C#Barcode|Sequence=TCGGTTACAAT,Start=19,End=29,#Primer5|Sequence=GGGGACCAGGTGCCGTAAG,Start=132,End=150,#Primer3|Sequence=GCGATCCTAGGGCGATCA,Start=1,End=18,	GGGGACCAGGTGCCGTAAGAGGATTGTCTTGTTTCCTTTTTTTTTTTTTTTTTTTTTGTTTTTTTATGACTAAATAAAGTAAATCATATGAGGTTTTATTTTTTATTTCGTTGATTTGGGTTCGGTTACAATGCGATCCTAGGGCGATCA
674	674		SetName|SetName=duplicate barcodes hubs pos neg#Context|Name=context_canon_term_pos_YAL016W#Barcode|Sequence=CGAACGTAGTG,Start=19,End=29,#Primer5|Sequence=GGGGACCAGGTGCCGTAAG,Start=132,End=150,#Primer3|Sequence=GCGATCCTAGGGCGATCA,Start=1,End=18,	GGGGACCAGGTGCCGTAAGTACTAGTTCAAATATATACATACATACACATATGTACACTTGAATGAATAAAAAGTATACATATTAACAACTAGGCCTGCTTTCTTTTCTTTTCTTTTTTTTCGAACGTAGTGGCGATCCTAGGGCGATCA
675	675	3.1513	SetName|SetName=duplicate barcodes hubs pos neg#Context|Name=context_canon_term_pos_YAR007C#Barcode|Sequence=TAAGGGCTCCT,Start=19,End=29,#Primer5|Sequence=GGGGACCAGGTGCCGTAAG,Start=132,End=150,#Primer3|Sequence=GCGATCCTAGGGCGATCA,Start=1,End=18,	GGGGACCAGGTGCCGTAAGTGTATCAAATAATCAAGTACTATTTAATCTATGTAACATATGAGAAATGTAAAAAAAAAACTTCTATTTCGTCAAGTTTTTGAAGGGCGGTTCAGCATCTCTTAAGGGCTCCTGCGATCCTAGGGCGATCA
676	676	3.371	SetName|SetName=duplicate barcodes hubs pos neg#Context|Name=context_canon_term_pos_YAL044C#Barcode|Sequence=GCTTAGCCTAA,Start=19,End=29,#Primer5|Sequence=GGGGACCAGGTGCCGTAAG,Start=132,End=150,#Primer3|Sequence=GCGATCCTAGGGCGATCA,Start=1,End=18,	GGGGACCAGGTGCCGTAAGACAAAGCTTATACGTACGTAAAGTAATTTCATATATATGTATATATATGTAGGGGAAATAAAACAATAAACTCAACGTGTACACTTATGCTTATGCATTCTAGCTTAGCCTAAGCGATCCTAGGGCGATCA
677	677	2.7139	SetName|SetName=duplicate barcodes hubs pos neg#Context|Name=context_canon_term_pos_YBR252W#Barcode|Sequence=CGTGCAGCCTG,Start=19,End=29,#Primer5|Sequence=GGGGACCAGGTGCCGTAAG,Start=132,End=150,#Primer3|Sequence=GCGATCCTAGGGCGATCA,Start=1,End=18,	GGGGACCAGGTGCCGTAAGCTTAGTGTATATACTTTGGCACACTTGTATAATGTATAATAAAATCAGGATAAATCCAGTGTGACCCGGACTGAATTACTGAAACTTTGAAGTGTTAAGGAACGTGCAGCCTGGCGATCCTAGGGCGATCA
678	678	4.6424	SetName|SetName=duplicate barcodes hubs pos neg#Context|Name=context_canon_term_pos_YDR394W#Barcode|Sequence=GTTAGTACTGG,Start=19,End=29,#Primer5|Sequence=GGGGACCAGGTGCCGTAAG,Start=132,End=150,#Primer3|Sequence=GCGATCCTAGGGCGATCA,Start=1,End=18,	GGGGACCAGGTGCCGTAAGTTACCATATATGCTTCAACGTAGGTCTACATAAAGTATTACGTACATTTCTATCTAGACAACACTAAATGAAATAAATACAGACGCCACTTTTTTATCACGTGTTAGTACTGGGCGATCCTAGGGCGATCA
679	679	2.7447	SetName|SetName=duplicate barcodes hubs pos neg#Context|Name=context_canon_term_pos_YDR375C#Barcode|Sequence=AGATATTTGTC,Start=19,End=29,#Primer5|Sequence=GGGGACCAGGTGCCGTAAG,Start=132,End=150,#Primer3|Sequence=GCGATCCTAGGGCGATCA,Start=1,End=18,	GGGGACCAGGTGCCGTAAGGTGCTAAGTGGCGCCTTACTACATAACTTGTATATAATAAAAATTCAGAAGATGCTTTAACTTTTTCTCGTTAATAAGACCGAGTTATTTGCTATTACGAACAGATATTTGTCGCGATCCTAGGGCGATCA
680	680		SetName|SetName=duplicate barcodes hubs pos neg#Context|Name=context_canon_term_pos_YDR050C#Barcode|Sequence=CCCTTTTAGAG,Start=19,End=29,#Primer5|Sequence=GGGGACCAGGTGCCGTAAG,Start=132,End=150,#Primer3|Sequence=GCGATCCTAGGGCGATCA,Start=1,End=18,	GGGGACCAGGTGCCGTAAGGATTAATATAATTATATAAAAATATTATCTTCTTTTCTTTATATCTAGTGTTATGTAAAATAAATTGATGACTACGGAAAGCTTTTTTATATTGTTTCTTTTCCCTTTTAGAGGCGATCCTAGGGCGATCA
681	681	2.4559	SetName|SetName=duplicate barcodes hubs pos neg#Context|Name=context_canon_term_pos_YDL044C#Barcode|Sequence=GGCATACTTGT,Start=19,End=29,#Primer5|Sequence=GGGGACCAGGTGCCGTAAG,Start=132,End=150,#Primer3|Sequence=GCGATCCTAGGGCGATCA,Start=1,End=18,	GGGGACCAGGTGCCGTAAGAAAATTATTCAAACCTTGTAAATAGTGTTATATATATGTGTTAGACTTAAAAGCGCTAATAAACGTTCCTGCTCGCATTTAACTTCTGTTCCAATTTTCCTAGGCATACTTGTGCGATCCTAGGGCGATCA
682	682	1.2572	SetName|SetName=duplicate barcodes hubs pos neg#Context|Name=context_canon_term_pos_YDL227C#Barcode|Sequence=AAATTAGCTCC,Start=19,End=29,#Primer5|Sequence=GGGGACCAGGTGCCGTAAG,Start=132,End=150,#Primer3|Sequence=GCGATCCTAGGGCGATCA,Start=1,End=18,	GGGGACCAGGTGCCGTAAGAATGTGTATATTAGTTTAAAAAGTTGTATGTAATAAAAGTAAAATTTAATATTTTGGATGAAAAAAACCATTTTTAGACTTTTTCTTAACTAGAATGCTGGAAAATTAGCTCCGCGATCCTAGGGCGATCA
683	683		SetName|SetName=duplicate barcodes hubs pos neg#Context|Name=context_canon_term_pos_YEL059C_A#Barcode|Sequence=CATTTACGTCT,Start=19,End=29,#Primer5|Sequence=GGGGACCAGGTGCCGTAAG,Start=132,End=150,#Primer3|Sequence=GCGATCCTAGGGCGATCA,Start=1,End=18,	GGGGACCAGGTGCCGTAAGAAATTACATATACTCTATATAGCACAGTAGTGTGATAAATAAAAAATTTTGCCAAGACTTTTTTAAACTGCACCCGACAGATCAGGTCTGTGCCTACTATGCCATTTACGTCTGCGATCCTAGGGCGATCA
684	684	4.6974	SetName|SetName=duplicate barcodes hubs pos neg#Context|Name=context_canon_term_pos_YFL009W#Barcode|Sequence=TCTGCAATTGT,Start=19,End=29,#Primer5|Sequence=GGGGACCAGGTGCCGTAAG,Start=132,End=150,#Primer3|Sequence=GCGATCCTAGGGCGATCA,Start=1,End=18,	GGGGACCAGGTGCCGTAAGCCTTTCCCAGAGAATAAGCATTGACTCATACTTAGATAATATAGCTTAATAAGTAGTTATATAATCAGTAAAAAAGTACAATAACAACTTCGTACATTTTATTCTGCAATTGTGCGATCCTAGGGCGATCA
685	685	3.9754	SetName|SetName=duplicate barcodes hubs pos neg#Context|Name=context_canon_term_pos_YFR039C#Barcode|Sequence=TCAAAGTGTGT,Start=19,End=29,#Primer5|Sequence=GGGGACCAGGTGCCGTAAG,Start=132,End=150,#Primer3|Sequence=GCGATCCTAGGGCGATCA,Start=1,End=18,	GGGGACCAGGTGCCGTAAGTCAATATATAGGTATGTATATGTACATATATACAAACATTTAATAAAAACAATATTGTATGATAACCAAGTTAAAGACCGGAGGTTGTTTCAAATAGCTTGATCAAAGTGTGTGCGATCCTAGGGCGATCA
686	686	3.1407	SetName|SetName=duplicate barcodes hubs pos neg#Context|Name=context_canon_term_pos_YGR166W#Barcode|Sequence=TTCTTGGACGA,Start=19,End=29,#Primer5|Sequence=GGGGACCAGGTGCCGTAAG,Start=132,End=150,#Primer3|Sequence=GCGATCCTAGGGCGATCA,Start=1,End=18,	GGGGACCAGGTGCCGTAAGGCGGAACAAGTATACATTTTATTAACATAGACTACATACTAATCTGTAACATTTCTATAAAAAAGTTATTATCATCACATTACACGATAGAAACACTTCCATTTCTTGGACGAGCGATCCTAGGGCGATCA
687	687		SetName|SetName=duplicate barcodes hubs pos neg#Context|Name=context_canon_term_pos_YHR200W#Barcode|Sequence=GCGAGCCCGTT,Start=19,End=29,#Primer5|Sequence=GGGGACCAGGTGCCGTAAG,Start=132,End=150,#Primer3|Sequence=GCGATCCTAGGGCGATCA,Start=1,End=18,	GGGGACCAGGTGCCGTAAGTAGTGTACAAAAATATCTATATGGGTCATATATAAACCAAATAAAGCATATATAACATCTCCCTTCACTCTTCCAGGTTTGAGTACGCTTCCTCTAAATAGGGCGAGCCCGTTGCGATCCTAGGGCGATCA
688	688		SetName|SetName=duplicate barcodes hubs pos neg#Context|Name=context_canon_term_pos_YIR021W#Barcode|Sequence=GTGAGTTCGAC,Start=19,End=29,#Primer5|Sequence=GGGGACCAGGTGCCGTAAG,Start=132,End=150,#Primer3|Sequence=GCGATCCTAGGGCGATCA,Start=1,End=18,	GGGGACCAGGTGCCGTAAGTCCTCTTATATAGCATGTAAATAGAAAGTACGTAAAAAAAAGCTACTATTGACTTTATTCTCCGTGAGGGCGGTTCTTTCTGTAGCTGTTGGTTTTTTCCAGGTGAGTTCGACGCGATCCTAGGGCGATCA
689	689	3.2361	SetName|SetName=duplicate barcodes hubs pos neg#Context|Name=context_canon_term_pos_YIR035C#Barcode|Sequence=TATGCGAACAC,Start=19,End=29,#Primer5|Sequence=GGGGACCAGGTGCCGTAAG,Start=132,End=150,#Primer3|Sequence=GCGATCCTAGGGCGATCA,Start=1,End=18,	GGGGACCAGGTGCCGTAAGGGATAGCAGGTACATATAAATTGTTACATACTAAGTCGATGAGTCAAAAAAGACTCTTATACATTTATACATTTTGCATTATTATTTTTTTTTTCCAGCGGATATGCGAACACGCGATCCTAGGGCGATCA
690	690	0.2824	SetName|SetName=duplicate barcodes hubs pos neg#Context|Name=context_canon_term_pos_YIL115C#Barcode|Sequence=GCTATCGCGCA,Start=19,End=29,#Primer5|Sequence=GGGGACCAGGTGCCGTAAG,Start=132,End=150,#Primer3|Sequence=GCGATCCTAGGGCGATCA,Start=1,End=18,	GGGGACCAGGTGCCGTAAGTGATATTTAGCTATATGTACGTTGTTAGTGCCGTTAATAATAAATTCATCCTCTATCATAGAAACAGGGCATGAGAAACGAAGAAAAATTGATATTGTAACAGCTATCGCGCAGCGATCCTAGGGCGATCA
691	691	4.0168	SetName|SetName=duplicate barcodes hubs pos neg#Context|Name=context_canon_term_pos_YJL050W#Barcode|Sequence=CCATGTCGGTT,Start=19,End=29,#Primer5|Sequence=GGGGACCAGGTGCCGTAAG,Start=132,End=150,#Primer3|Sequence=GCGATCCTAGGGCGATCA,Start=1,End=18,	GGGGACCAGGTGCCGTAAGTTAATCACACACAATTATGTATTTTTATTGGTATATATAATAAACAAATAGATTTCATCAACATTTATTATATAATAACATTTTTGTTTGGGCAAGCACACTCCATGTCGGTTGCGATCCTAGGGCGATCA
692	692		SetName|SetName=duplicate barcodes hubs pos neg#Context|Name=context_canon_term_pos_YJR100C#Barcode|Sequence=AACCATGCTAC,Start=19,End=29,#Primer5|Sequence=GGGGACCAGGTGCCGTAAG,Start=132,End=150,#Primer3|Sequence=GCGATCCTAGGGCGATCA,Start=1,End=18,	GGGGACCAGGTGCCGTAAGGTGAATTATATATTTAAAAGAATTCTGTAAATACATATTTGACTACGCAGTAATAAAACAATTATTATTCCCAATTAGGGCCCAATCCTAGCATAGCAAAGTAACCATGCTACGCGATCCTAGGGCGATCA
693	693	3.1513	SetName|SetName=duplicate barcodes hubs pos neg#Context|Name=context_canon_term_pos_YJL204C#Barcode|Sequence=ACAACTGAGAG,Start=19,End=29,#Primer5|Sequence=GGGGACCAGGTGCCGTAAG,Start=132,End=150,#Primer3|Sequence=GCGATCCTAGGGCGATCA,Start=1,End=18,	GGGGACCAGGTGCCGTAAGATTCCTATCAATGATTAATTATATTACTCTATATAGGTATGAAGTGCGGAAATAAAAGACTGTTCACATATTAGATTATTCAAGATTACGCGGGCTCTATTTACAACTGAGAGGCGATCCTAGGGCGATCA
694	694	3.371	SetName|SetName=duplicate barcodes hubs pos neg#Context|Name=context_canon_term_pos_YLR064W#Barcode|Sequence=CAAAGTGGTAT,Start=19,End=29,#Primer5|Sequence=GGGGACCAGGTGCCGTAAG,Start=132,End=150,#Primer3|Sequence=GCGATCCTAGGGCGATCA,Start=1,End=18,	GGGGACCAGGTGCCGTAAGCATGCTCATTTTAAGTATATCTAAATATTATTTTGTATATACTCACACTCCTCTATAGAAAGCAAAAAATTTCAAAAACGTTTGAAAAGCTTTGTTTAACGACAAAGTGGTATGCGATCCTAGGGCGATCA
695	695	2.7139	SetName|SetName=duplicate barcodes hubs pos neg#Context|Name=context_canon_term_pos_YLR298C#Barcode|Sequence=GACTAAGTTAG,Start=19,End=29,#Primer5|Sequence=GGGGACCAGGTGCCGTAAG,Start=132,End=150,#Primer3|Sequence=GCGATCCTAGGGCGATCA,Start=1,End=18,	GGGGACCAGGTGCCGTAAGCGCTATCAGATTAGATTATTAAATATTATATGTAGACTATATTTTGCCAAAAAAAACAATAGAGATATCAACAACGAATGAAAATGGTATGATGAGAATAAAGACTAAGTTAGGCGATCCTAGGGCGATCA
696	696	4.6424	SetName|SetName=duplicate barcodes hubs pos neg#Context|Name=context_canon_term_pos_YLR272C#Barcode|Sequence=CGGCCACTGTT,Start=19,End=29,#Primer5|Sequence=GGGGACCAGGTGCCGTAAG,Start=132,End=150,#Primer3|Sequence=GCGATCCTAGGGCGATCA,Start=1,End=18,	GGGGACCAGGTGCCGTAAGTCGAACTGACGTTTACCCGTTTCTTCCGTTTTATATTATATGTTATTATATAAATAAAAGCTGTTCATTTCTTTCTTCTTGAAATATGACTTTACCTATCTCCGGCCACTGTTGCGATCCTAGGGCGATCA
697	697	2.7447	SetName|SetName=duplicate barcodes hubs pos neg#Context|Name=context_canon_term_pos_YNR049C#Barcode|Sequence=CCACAACCTGG,Start=19,End=29,#Primer5|Sequence=GGGGACCAGGTGCCGTAAG,Start=132,End=150,#Primer3|Sequence=GCGATCCTAGGGCGATCA,Start=1,End=18,	GGGGACCAGGTGCCGTAAGATAGCACTATACCTTGCTGAAATAAAGCGAAAAGAACATTTAATGAATATATAGGTATCGTATATGTACTGAATAAAGTGTTTGATACAGAATGCAAGGAGACCACAACCTGGGCGATCCTAGGGCGATCA
698	698	3.0261	SetName|SetName=duplicate barcodes hubs pos neg#Context|Name=context_canon_term_pos_YNL011C#Barcode|Sequence=ACGATCGCGTT,Start=19,End=29,#Primer5|Sequence=GGGGACCAGGTGCCGTAAG,Start=132,End=150,#Primer3|Sequence=GCGATCCTAGGGCGATCA,Start=1,End=18,	GGGGACCAGGTGCCGTAAGTGCAACTATGTCGCTCATTAACGGTTATTATAGTGAAGACTACATAATAAAGACATAGATAATAAAAAAGAATCGCGTTTGAACCATGTTTTATTTAACCATACGATCGCGTTGCGATCCTAGGGCGATCA
699	699	1.8027	SetName|SetName=duplicate barcodes hubs pos neg#Context|Name=context_canon_term_pos_YNL231C#Barcode|Sequence=TGCTAGGTGTC,Start=19,End=29,#Primer5|Sequence=GGGGACCAGGTGCCGTAAG,Start=132,End=150,#Primer3|Sequence=GCGATCCTAGGGCGATCA,Start=1,End=18,	GGGGACCAGGTGCCGTAAGAGGCAAATTTAGATAGATAATGATAATGCACTATAATATATAATAAATAAAAGAGAATAAAAAGTTTAATCACGTTCCCGCTTCTTTTTCCTAACCATCAAATGCTAGGTGTCGCGATCCTAGGGCGATCA
700	700	1.7005	SetName|SetName=duplicate barcodes hubs pos neg#Context|Name=context_canon_term_pos_YOL009C#Barcode|Sequence=CCCTTCTAGTT,Start=19,End=29,#Primer5|Sequence=GGGGACCAGGTGCCGTAAG,Start=132,End=150,#Primer3|Sequence=GCGATCCTAGGGCGATCA,Start=1,End=18,	GGGGACCAGGTGCCGTAAGTTTAACAAAGATAGTTTGAAAATAGTGTCTACATAAAAAAACAAACATTTTTGAGCTGGAAAATTATATTTTGTCATGAAGTAATCTATTCTTAACGCGCTTCCCTTCTAGTTGCGATCCTAGGGCGATCA
701	701	3.3565	SetName|SetName=duplicate barcodes hubs pos neg#Context|Name=context_canon_term_pos_YOL073C#Barcode|Sequence=AAAGTGAACTC,Start=19,End=29,#Primer5|Sequence=GGGGACCAGGTGCCGTAAG,Start=132,End=150,#Primer3|Sequence=GCGATCCTAGGGCGATCA,Start=1,End=18,	GGGGACCAGGTGCCGTAAGTTTATATCAGCATATACCTACATAAACAAATAAACATAGCAACGGTTTAGCAACATCGTTTACAGCCATGTGAGGCAGTTACTTCTATCATATGTCTGGCTTAAAGTGAACTCGCGATCCTAGGGCGATCA
702	702	3.6586	SetName|SetName=duplicate barcodes hubs pos neg#Context|Name=context_canon_term_pos_YPL006W#Barcode|Sequence=TGTTTTCTGAA,Start=19,End=29,#Primer5|Sequence=GGGGACCAGGTGCCGTAAG,Start=132,End=150,#Primer3|Sequence=GCGATCCTAGGGCGATCA,Start=1,End=18,	GGGGACCAGGTGCCGTAAGCCATAGCAGATTATACTATATTTTACGTAGTGAAAAAATAGGTAAAAATTCGTTAATTATTCTGATGCCACACCAGAAAATCTGTGGGAAAATTTTTCGAGTTGTTTTCTGAAGCGATCCTAGGGCGATCA
703	703	0.6343	SetName|SetName=duplicate barcodes hubs pos neg#Context|Name=context_canon_term_neg_YBL097W#Barcode|Sequence=AGTCCTTTGGC,Start=19,End=29,#Primer5|Sequence=GGGGACCAGGTGCCGTAAG,Start=132,End=150,#Primer3|Sequence=GCGATCCTAGGGCGATCA,Start=1,End=18,	GGGGACCAGGTGCCGTAAGTTGATGATCTTTTTTTTTTTTTTTTTTTTTTTTTTTGTGCTGCAAAGTTTCTTAAAGCCTTCGGGCTTACGAAATCCTTTATCGCCGAAAGGGGACCGCTTCAGTCCTTTGGCGCGATCCTAGGGCGATCA
704	704	4.883	SetName|SetName=duplicate barcodes hubs pos neg#Context|Name=context_canon_term_neg_YBL075C#Barcode|Sequence=ACAGGGCTCAG,Start=19,End=29,#Primer5|Sequence=GGGGACCAGGTGCCGTAAG,Start=132,End=150,#Primer3|Sequence=GCGATCCTAGGGCGATCA,Start=1,End=18,	GGGGACCAGGTGCCGTAAGTTATTCTTCTATAGTGTTCTATTTAGCTACTTTTTATGTTTAACCTTTTATACGATGGCGGGTAATCTATCCATGATGACGAAAAATTTTTTTTTTTTTTGTACAGGGCTCAGGCGATCCTAGGGCGATCA
705	705	3.3957	SetName|SetName=duplicate barcodes hubs pos neg#Context|Name=context_canon_term_neg_YBL088C#Barcode|Sequence=CACGACGGTCT,Start=19,End=29,#Primer5|Sequence=GGGGACCAGGTGCCGTAAG,Start=132,End=150,#Primer3|Sequence=GCGATCCTAGGGCGATCA,Start=1,End=18,	GGGGACCAGGTGCCGTAAGTTGCTATGCAGATGCTTTATACTTCTTTTTTTTGTTTATAGAAATACGAAAAGTAATGTACAAACTCAATGTGATGATGTGCCCAAAAATACAATCGCTGATCACGACGGTCTGCGATCCTAGGGCGATCA
706	706	2.7936	SetName|SetName=duplicate barcodes hubs pos neg#Context|Name=context_canon_term_neg_YCR032W#Barcode|Sequence=GTTAATCCCTA,Start=19,End=29,#Primer5|Sequence=GGGGACCAGGTGCCGTAAG,Start=132,End=150,#Primer3|Sequence=GCGATCCTAGGGCGATCA,Start=1,End=18,	GGGGACCAGGTGCCGTAAGGCATCACATCGTAACGCCTTTCTTTAAATGATTCAATTTTTGTAGTTTATATCTTTACTTTTGAAACTGATTTCTCATCCCATCTAGTATTGTAATTGCGTAGTTAATCCCTAGCGATCCTAGGGCGATCA
707	707	0.5373	SetName|SetName=duplicate barcodes hubs pos neg#Context|Name=context_canon_term_neg_YDR325W#Barcode|Sequence=TGATTGTACAC,Start=19,End=29,#Primer5|Sequence=GGGGACCAGGTGCCGTAAG,Start=132,End=150,#Primer3|Sequence=GCGATCCTAGGGCGATCA,Start=1,End=18,	GGGGACCAGGTGCCGTAAGAATTGATATGCGAGCTCTTCATCTATTTAAGTTGATTTTTTGGTTGTAAACATATTTGTATTTTATTCTTAGGTTTGTTAATTCTTCTACGCTTACCAGATATGATTGTACACGCGATCCTAGGGCGATCA
708	708	3.4362	SetName|SetName=duplicate barcodes hubs pos neg#Context|Name=context_canon_term_neg_YDR457W#Barcode|Sequence=GTCAAGCAATC,Start=19,End=29,#Primer5|Sequence=GGGGACCAGGTGCCGTAAG,Start=132,End=150,#Primer3|Sequence=GCGATCCTAGGGCGATCA,Start=1,End=18,	GGGGACCAGGTGCCGTAAGTCATTTTTCGTGTAAATTTATAGCGCCATGTAACCAAGTATTTTAGAACGTCTTTTATTTAAACCTTTAACCATACAACACTTGCCCAAGGAAGAGGAACAGGTCAAGCAATCGCGATCCTAGGGCGATCA
709	709	0.5895	SetName|SetName=duplicate barcodes hubs pos neg#Context|Name=context_canon_term_neg_YDL205C#Barcode|Sequence=ACACCTTGTCG,Start=19,End=29,#Primer5|Sequence=GGGGACCAGGTGCCGTAAG,Start=132,End=150,#Primer3|Sequence=GCGATCCTAGGGCGATCA,Start=1,End=18,	GGGGACCAGGTGCCGTAAGACACCATTAATTTGATCAGTCCAAAAACTCTATTATTACTAACTAAAGTTCCCTTTTTTTTTTTTTTTTTTTTTTTTTTCCTTATCTCCTTTATCTTTCAGTACACCTTGTCGGCGATCCTAGGGCGATCA
710	710	1.4968	SetName|SetName=duplicate barcodes hubs pos neg#Context|Name=context_canon_term_neg_YER013W#Barcode|Sequence=ACTATGTCGGC,Start=19,End=29,#Primer5|Sequence=GGGGACCAGGTGCCGTAAG,Start=132,End=150,#Primer3|Sequence=GCGATCCTAGGGCGATCA,Start=1,End=18,	GGGGACCAGGTGCCGTAAGCATTGTTAGCTTTTTATGCATTATAATTATCGAGTTTTATAGACCTATATTTAATTTTTTAACAACTTTATCTCTCTTGAGAATTTTTACATGAAAAAAATCACTATGTCGGCGCGATCCTAGGGCGATCA
711	711	1.999	SetName|SetName=duplicate barcodes hubs pos neg#Context|Name=context_canon_term_neg_YFL054C#Barcode|Sequence=AGAGCGATTAC,Start=19,End=29,#Primer5|Sequence=GGGGACCAGGTGCCGTAAG,Start=132,End=150,#Primer3|Sequence=GCGATCCTAGGGCGATCA,Start=1,End=18,	GGGGACCAGGTGCCGTAAGTTAATATTTTCAATTTTTTACGATTTATAACCTAATTATTAATTTCACGAACTTATTATTTGACGACATACTACATCCGGGAGCCGTGACTTTGTTACCATCAGAGCGATTACGCGATCCTAGGGCGATCA
712	712	0.5067	SetName|SetName=duplicate barcodes hubs pos neg#Context|Name=context_canon_term_neg_YGR126W#Barcode|Sequence=CTAATCTGTCG,Start=19,End=29,#Primer5|Sequence=GGGGACCAGGTGCCGTAAG,Start=132,End=150,#Primer3|Sequence=GCGATCCTAGGGCGATCA,Start=1,End=18,	GGGGACCAGGTGCCGTAAGGTGGCATAGCAACATTTAGTTCGCAATGCGTTTACTTCAGAATCATTCTTTTTTTTTTTTTTTTTTTTTTTTTGCCTCACATTATATTCTTGGCATCTGCCTCTAATCTGTCGGCGATCCTAGGGCGATCA
713	713	1.4559	SetName|SetName=duplicate barcodes hubs pos neg#Context|Name=context_canon_term_neg_YGL194C#Barcode|Sequence=TGCAGCGATAC,Start=19,End=29,#Primer5|Sequence=GGGGACCAGGTGCCGTAAG,Start=132,End=150,#Primer3|Sequence=GCGATCCTAGGGCGATCA,Start=1,End=18,	GGGGACCAGGTGCCGTAAGTTTAAGAGTTTGCTATTCGGTTAATCTCCCGTTTTTTTTTTTTTTTTTTTTTTTATTTTCCTTTTTTTTTTTTTAATGTTTTTAGCATATTATGTAGAGTGTTGCAGCGATACGCGATCCTAGGGCGATCA
714	714	0.6316	SetName|SetName=duplicate barcodes hubs pos neg#Context|Name=context_canon_term_neg_YHL030W_A#Barcode|Sequence=CCTGTAGTGAT,Start=19,End=29,#Primer5|Sequence=GGGGACCAGGTGCCGTAAG,Start=132,End=150,#Primer3|Sequence=GCGATCCTAGGGCGATCA,Start=1,End=18,	GGGGACCAGGTGCCGTAAGTTTATTTTTTCCTTGTCTTTTTATCTCTTTTTTTTTGTTTTTCGTTCTCTTTATTTTCAACAACGCCTAGAAAATTTGGTTACCAACCACACTATTGAACAACCTGTAGTGATGCGATCCTAGGGCGATCA
715	715	0.6415	SetName|SetName=duplicate barcodes hubs pos neg#Context|Name=context_canon_term_neg_YIL054W#Barcode|Sequence=CTACCATGCCC,Start=19,End=29,#Primer5|Sequence=GGGGACCAGGTGCCGTAAG,Start=132,End=150,#Primer3|Sequence=GCGATCCTAGGGCGATCA,Start=1,End=18,	GGGGACCAGGTGCCGTAAGTGATGTGTGAGTTCCTCTTTTCTTTTTTTCTTTTCTTTTTTCCTTTTTTTTTCTTTTCTTACTCTGTTAATCACTTTCTTTCCTTTTTGTTCATATTGTCGTCTACCATGCCCGCGATCCTAGGGCGATCA
716	716		SetName|SetName=duplicate barcodes hubs pos neg#Context|Name=context_canon_term_neg_YIL084C#Barcode|Sequence=GAGCTTTGTTC,Start=19,End=29,#Primer5|Sequence=GGGGACCAGGTGCCGTAAG,Start=132,End=150,#Primer3|Sequence=GCGATCCTAGGGCGATCA,Start=1,End=18,	GGGGACCAGGTGCCGTAAGTTTATTTTATGCTGCAAACCTTCCACTTTAACTTTGTATTATATTACATTAGATGGTTATATTTCAATGTGAGCTCTTTTTGTTTTTGCTTTCTTTTCTCGGGAGCTTTGTTCGCGATCCTAGGGCGATCA
717	717	0.4264	SetName|SetName=duplicate barcodes hubs pos neg#Context|Name=context_canon_term_neg_YIL105C#Barcode|Sequence=CCAAGGTGTAA,Start=19,End=29,#Primer5|Sequence=GGGGACCAGGTGCCGTAAG,Start=132,End=150,#Primer3|Sequence=GCGATCCTAGGGCGATCA,Start=1,End=18,	GGGGACCAGGTGCCGTAAGATACAAGTATAGTAAACTAGAATGTTTTTATTTCCTTCCATCCATATGTTATATTAATATGTTTCCGTATTTTTGTTTTTGTGTCCCATGCATGGAAGAATACCAAGGTGTAAGCGATCCTAGGGCGATCA
718	718	2.5784	SetName|SetName=duplicate barcodes hubs pos neg#Context|Name=context_canon_term_neg_YKL143W#Barcode|Sequence=ATTAAGACCAG,Start=19,End=29,#Primer5|Sequence=GGGGACCAGGTGCCGTAAG,Start=132,End=150,#Primer3|Sequence=GCGATCCTAGGGCGATCA,Start=1,End=18,	GGGGACCAGGTGCCGTAAGAGGAGTAGAATGAGATGAGAAAGCACCTACATTACAAGTACTGTGTAGACATGTATACTTAGCCTAGAATGCATTGATGCTAAAATACATCCTGCCCACCGGATTAAGACCAGGCGATCCTAGGGCGATCA
719	719	3.7694	SetName|SetName=duplicate barcodes hubs pos neg#Context|Name=context_canon_term_neg_YLR450W#Barcode|Sequence=AAATACGGTCT,Start=19,End=29,#Primer5|Sequence=GGGGACCAGGTGCCGTAAG,Start=132,End=150,#Primer3|Sequence=GCGATCCTAGGGCGATCA,Start=1,End=18,	GGGGACCAGGTGCCGTAAGCTCTTGTAGTTTACATGGTGATACTTTATATCTTTGTATTGTCTAGCTATTCTAAATCATCTGCATGTAATAAGAAGTTGATCAAAATGACTCGCTGCGTAAAAATACGGTCTGCGATCCTAGGGCGATCA
720	720	4.2674	SetName|SetName=duplicate barcodes hubs pos neg#Context|Name=context_canon_term_neg_YLR277C#Barcode|Sequence=TAACGCAGCCG,Start=19,End=29,#Primer5|Sequence=GGGGACCAGGTGCCGTAAG,Start=132,End=150,#Primer3|Sequence=GCGATCCTAGGGCGATCA,Start=1,End=18,	GGGGACCAGGTGCCGTAAGAAACAGTTACGCATACTAAGTAGACTACTTTATAGAAGTAATACCAAACCAAAATCTGGTTAGAACTGCCTTTTATTGTTTACCTTAATCACTCTTTACGTATAACGCAGCCGGCGATCCTAGGGCGATCA
721	721	0.3786	SetName|SetName=duplicate barcodes hubs pos neg#Context|Name=context_canon_term_neg_YLR055C#Barcode|Sequence=ACTGGTGCTCT,Start=19,End=29,#Primer5|Sequence=GGGGACCAGGTGCCGTAAG,Start=132,End=150,#Primer3|Sequence=GCGATCCTAGGGCGATCA,Start=1,End=18,	GGGGACCAGGTGCCGTAAGTGAGTTGTAATAATAATCATAACCATAATCATAATCATAATTACTCCGCGCGCCGTTTATTTTTTTTTTTTTTTTTTCAGGGCCACTGATCCCTTCATTTTGACTGGTGCTCTGCGATCCTAGGGCGATCA
722	722	0.6865	SetName|SetName=duplicate barcodes hubs pos neg#Context|Name=context_canon_term_neg_YLL013C#Barcode|Sequence=TTGCGTAGTGC,Start=19,End=29,#Primer5|Sequence=GGGGACCAGGTGCCGTAAG,Start=132,End=150,#Primer3|Sequence=GCGATCCTAGGGCGATCA,Start=1,End=18,	GGGGACCAGGTGCCGTAAGTTAGTGTTATCATCGTTCTCCTTTCACTTTTTACTATTTTTTTTTTTTTTTTTTTTTTTTTTTTTTCCTCCATTTGTCTTTCACTTACTCTATTTTATTTTGTTGCGTAGTGCGCGATCCTAGGGCGATCA
723	723	0.6381	SetName|SetName=duplicate barcodes hubs pos neg#Context|Name=context_canon_term_neg_YLL019C#Barcode|Sequence=CGTTACTGCCT,Start=19,End=29,#Primer5|Sequence=GGGGACCAGGTGCCGTAAG,Start=132,End=150,#Primer3|Sequence=GCGATCCTAGGGCGATCA,Start=1,End=18,	GGGGACCAGGTGCCGTAAGTGGGTGTTCTCGTTCTACTTTTCTCTTCTTTTTTTCACATCTTTTACTAGTTCCGTTTTTTTTTTTTTTAACTCTTCTTTTTCATTTTCCGGTTTTTAATAACGTTACTGCCTGCGATCCTAGGGCGATCA
724	724	3.5889	SetName|SetName=duplicate barcodes hubs pos neg#Context|Name=context_canon_term_neg_YMR323W#Barcode|Sequence=AATATGTAACG,Start=19,End=29,#Primer5|Sequence=GGGGACCAGGTGCCGTAAG,Start=132,End=150,#Primer3|Sequence=GCGATCCTAGGGCGATCA,Start=1,End=18,	GGGGACCAGGTGCCGTAAGAGGATTGTCTTGTTTCCTTTTTTTTTTTTTTGTTTTTTTATGACTAAATAAAGTAAATCATATGAGGTTTTATTTTTTATTTCGTTGATTTGGGTTACAGTAAATATGTAACGGCGATCCTAGGGCGATCA
725	725	0.3171	SetName|SetName=duplicate barcodes hubs pos neg#Context|Name=context_canon_term_neg_YNL086W#Barcode|Sequence=ACTGCTACGGT,Start=19,End=29,#Primer5|Sequence=GGGGACCAGGTGCCGTAAG,Start=132,End=150,#Primer3|Sequence=GCGATCCTAGGGCGATCA,Start=1,End=18,	GGGGACCAGGTGCCGTAAGGTAAACATACACATGTATAGCATAATCTTCGATTCCTTTTACCCATTCGTAGATGGCATCGACAGTGTACTTATAATACTACCGTGAGAAACGATATTAAGAACTGCTACGGTGCGATCCTAGGGCGATCA
726	726	2.863	SetName|SetName=duplicate barcodes hubs pos neg#Context|Name=context_canon_term_neg_YNR041C#Barcode|Sequence=GAAATGGTCCC,Start=19,End=29,#Primer5|Sequence=GGGGACCAGGTGCCGTAAG,Start=132,End=150,#Primer3|Sequence=GCGATCCTAGGGCGATCA,Start=1,End=18,	GGGGACCAGGTGCCGTAAGATATAGCGTGCATATACAAGTGTTTAATTGTTCTTTTATTCGATTATTATTTACATGCATTCTTACGTAGATGTCCGTACCTATTTGGGCTTCACGATATTCGAAATGGTCCCGCGATCCTAGGGCGATCA
727	727	1.4405	SetName|SetName=duplicate barcodes hubs pos neg#Context|Name=context_canon_term_neg_YOR390W#Barcode|Sequence=GTCTGCGTCCG,Start=19,End=29,#Primer5|Sequence=GGGGACCAGGTGCCGTAAG,Start=132,End=150,#Primer3|Sequence=GCGATCCTAGGGCGATCA,Start=1,End=18,	GGGGACCAGGTGCCGTAAGGATCTTTTCTTTATACTTTTCCCTGCATAATCATCCCACTTTTTTTTTTTTTTTTTTTAATTCATTTTCAAGATTTTAGACGTTGTATAATACATTTTTACCGTCTGCGTCCGGCGATCCTAGGGCGATCA
728	728	3.4388	SetName|SetName=duplicate barcodes hubs pos neg#Context|Name=context_canon_term_neg_YOR393W#Barcode|Sequence=GGGTCAGCCCA,Start=19,End=29,#Primer5|Sequence=GGGGACCAGGTGCCGTAAG,Start=132,End=150,#Primer3|Sequence=GCGATCCTAGGGCGATCA,Start=1,End=18,	GGGGACCAGGTGCCGTAAGAGGATTGTCTTGTTTCCTTTTTTTTTTTTTTTTTTTTGTTTTTTTATGACTAAATAAAGTAAATCATATGAGGTTTTATTTTTTATTTCGTTGATTTGGGTTGGGTCAGCCCAGCGATCCTAGGGCGATCA
729	729	2.2909	SetName|SetName=duplicate barcodes hubs pos neg#Context|Name=context_canon_term_neg_YOL124C#Barcode|Sequence=AAAGTGGTCAC,Start=19,End=29,#Primer5|Sequence=GGGGACCAGGTGCCGTAAG,Start=132,End=150,#Primer3|Sequence=GCGATCCTAGGGCGATCA,Start=1,End=18,	GGGGACCAGGTGCCGTAAGAATGATGCATAAGCCCTTTGTAATTTTAAGATATATTTACTTACTCTTTCTCTTAAAGAAAAAAAAAAAAAAAGAAGAACAATTTATCTATACCTATATTTAAAAGTGGTCACGCGATCCTAGGGCGATCA
730	730	4.0242	SetName|SetName=duplicate barcodes hubs pos neg#Context|Name=context_canon_term_neg_YPR172W#Barcode|Sequence=CAGTGCTACAC,Start=19,End=29,#Primer5|Sequence=GGGGACCAGGTGCCGTAAG,Start=132,End=150,#Primer3|Sequence=GCGATCCTAGGGCGATCA,Start=1,End=18,	GGGGACCAGGTGCCGTAAGCTGTCCTCTGCTTTTCTTTATCTATTTTGCATACGATTCTGTATTTAATTATTCTGTTTTTTTTTTTTTTTTATTTTTTATTTTCATGTACACAAGAAATCTCAGTGCTACACGCGATCCTAGGGCGATCA
731	731	0.3031	SetName|SetName=duplicate barcodes hubs pos neg#Context|Name=context_canon_term_neg_YPR175W#Barcode|Sequence=AAGAGGCAGCA,Start=19,End=29,#Primer5|Sequence=GGGGACCAGGTGCCGTAAG,Start=132,End=150,#Primer3|Sequence=GCGATCCTAGGGCGATCA,Start=1,End=18,	GGGGACCAGGTGCCGTAAGATAATGCATCAAAATAAGAACACTTAAACAAGCACGGTAGTGTTGGTACTCTGCCATCTATTTGTATGGATACTTTTTGAATTTTGATGTAACGGATTTCGGAAGAGGCAGCAGCGATCCTAGGGCGATCA
732	732	0.2972	SetName|SetName=duplicate barcodes hubs pos neg#Context|Name=context_canon_term_neg_YPR170C#Barcode|Sequence=CCTACCAGTCA,Start=19,End=29,#Primer5|Sequence=GGGGACCAGGTGCCGTAAG,Start=132,End=150,#Primer3|Sequence=GCGATCCTAGGGCGATCA,Start=1,End=18,	GGGGACCAGGTGCCGTAAGTATTGTGGTGTTCTTTTCGATATTCTCAGATACCGTTTATTGTGCGCCATACCGATGGATGCAGAAATATCATTTAAATAGTTAAGCCAGGAAGTGGCTGAGCCTACCAGTCAGCGATCCTAGGGCGATCA
733	733	0.2732	SetName|SetName=duplicate barcodes hubs pos neg#Context|Name=context_canon_term_neg_YPR120C#Barcode|Sequence=CGACCGAACTT,Start=19,End=29,#Primer5|Sequence=GGGGACCAGGTGCCGTAAG,Start=132,End=150,#Primer3|Sequence=GCGATCCTAGGGCGATCA,Start=1,End=18,	GGGGACCAGGTGCCGTAAGATTAGTACTAGTAATGCTCATGAATTCGCATACTCTTTACATTTTCTTTTCTTTTTGCTGAACTAAAAGGAAAAAATTTTTTGCATCTATCTATCTATCTATCGACCGAACTTGCGATCCTAGGGCGATCA
734	734	3.8937	SetName|SetName=duplicate barcodes hubs pos neg#Context|Name=context_canon_term_neg_YPL281C#Barcode|Sequence=TCTGCTCGGTA,Start=19,End=29,#Primer5|Sequence=GGGGACCAGGTGCCGTAAG,Start=132,End=150,#Primer3|Sequence=GCGATCCTAGGGCGATCA,Start=1,End=18,	GGGGACCAGGTGCCGTAAGAGGATTGTCTTGTTTCCTTTTTTTTTTTTTTTTTTTTTGTTTTTTTATGACTAAATAAAGTAAATCATATGAGGTTTTATTTTTTATTTCGTTGATTTGGGTTCTGCTCGGTAGCGATCCTAGGGCGATCA
735	735	4.8904	SetName|SetName=duplicate barcodes hubs pos neg#Context|Name=context_canon_term_pos_YAL016W#Barcode|Sequence=TACGACCGCCA,Start=19,End=29,#Primer5|Sequence=GGGGACCAGGTGCCGTAAG,Start=132,End=150,#Primer3|Sequence=GCGATCCTAGGGCGATCA,Start=1,End=18,	GGGGACCAGGTGCCGTAAGTACTAGTTCAAATATATACATACATACACATATGTACACTTGAATGAATAAAAAGTATACATATTAACAACTAGGCCTGCTTTCTTTTCTTTTCTTTTTTTTTACGACCGCCAGCGATCCTAGGGCGATCA
736	736	3.5601	SetName|SetName=duplicate barcodes hubs pos neg#Context|Name=context_canon_term_pos_YAR007C#Barcode|Sequence=GGATTGCCGGG,Start=19,End=29,#Primer5|Sequence=GGGGACCAGGTGCCGTAAG,Start=132,End=150,#Primer3|Sequence=GCGATCCTAGGGCGATCA,Start=1,End=18,	GGGGACCAGGTGCCGTAAGTGTATCAAATAATCAAGTACTATTTAATCTATGTAACATATGAGAAATGTAAAAAAAAAACTTCTATTTCGTCAAGTTTTTGAAGGGCGGTTCAGCATCTCTGGATTGCCGGGGCGATCCTAGGGCGATCA
737	737	4.146	SetName|SetName=duplicate barcodes hubs pos neg#Context|Name=context_canon_term_pos_YAL044C#Barcode|Sequence=AGGTAACCTCA,Start=19,End=29,#Primer5|Sequence=GGGGACCAGGTGCCGTAAG,Start=132,End=150,#Primer3|Sequence=GCGATCCTAGGGCGATCA,Start=1,End=18,	GGGGACCAGGTGCCGTAAGACAAAGCTTATACGTACGTAAAGTAATTTCATATATATGTATATATATGTAGGGGAAATAAAACAATAAACTCAACGTGTACACTTATGCTTATGCATTCTAAGGTAACCTCAGCGATCCTAGGGCGATCA
738	738	3.3669	SetName|SetName=duplicate barcodes hubs pos neg#Context|Name=context_canon_term_pos_YBR252W#Barcode|Sequence=TTTAGCGGTGA,Start=19,End=29,#Primer5|Sequence=GGGGACCAGGTGCCGTAAG,Start=132,End=150,#Primer3|Sequence=GCGATCCTAGGGCGATCA,Start=1,End=18,	GGGGACCAGGTGCCGTAAGCTTAGTGTATATACTTTGGCACACTTGTATAATGTATAATAAAATCAGGATAAATCCAGTGTGACCCGGACTGAATTACTGAAACTTTGAAGTGTTAAGGAATTTAGCGGTGAGCGATCCTAGGGCGATCA
739	739	3.5617	SetName|SetName=duplicate barcodes hubs pos neg#Context|Name=context_canon_term_pos_YDR394W#Barcode|Sequence=ACGGTATTTGT,Start=19,End=29,#Primer5|Sequence=GGGGACCAGGTGCCGTAAG,Start=132,End=150,#Primer3|Sequence=GCGATCCTAGGGCGATCA,Start=1,End=18,	GGGGACCAGGTGCCGTAAGTTACCATATATGCTTCAACGTAGGTCTACATAAAGTATTACGTACATTTCTATCTAGACAACACTAAATGAAATAAATACAGACGCCACTTTTTTATCACGTACGGTATTTGTGCGATCCTAGGGCGATCA
740	740	2.6881	SetName|SetName=duplicate barcodes hubs pos neg#Context|Name=context_canon_term_pos_YDR375C#Barcode|Sequence=GTCCGATTGTG,Start=19,End=29,#Primer5|Sequence=GGGGACCAGGTGCCGTAAG,Start=132,End=150,#Primer3|Sequence=GCGATCCTAGGGCGATCA,Start=1,End=18,	GGGGACCAGGTGCCGTAAGGTGCTAAGTGGCGCCTTACTACATAACTTGTATATAATAAAAATTCAGAAGATGCTTTAACTTTTTCTCGTTAATAAGACCGAGTTATTTGCTATTACGAACGTCCGATTGTGGCGATCCTAGGGCGATCA
741	741		SetName|SetName=duplicate barcodes hubs pos neg#Context|Name=context_canon_term_pos_YDR050C#Barcode|Sequence=CACCTCCCTGT,Start=19,End=29,#Primer5|Sequence=GGGGACCAGGTGCCGTAAG,Start=132,End=150,#Primer3|Sequence=GCGATCCTAGGGCGATCA,Start=1,End=18,	GGGGACCAGGTGCCGTAAGGATTAATATAATTATATAAAAATATTATCTTCTTTTCTTTATATCTAGTGTTATGTAAAATAAATTGATGACTACGGAAAGCTTTTTTATATTGTTTCTTTTCACCTCCCTGTGCGATCCTAGGGCGATCA
742	742	2.0719	SetName|SetName=duplicate barcodes hubs pos neg#Context|Name=context_canon_term_pos_YDL044C#Barcode|Sequence=GAATAGTGACC,Start=19,End=29,#Primer5|Sequence=GGGGACCAGGTGCCGTAAG,Start=132,End=150,#Primer3|Sequence=GCGATCCTAGGGCGATCA,Start=1,End=18,	GGGGACCAGGTGCCGTAAGAAAATTATTCAAACCTTGTAAATAGTGTTATATATATGTGTTAGACTTAAAAGCGCTAATAAACGTTCCTGCTCGCATTTAACTTCTGTTCCAATTTTCCTAGAATAGTGACCGCGATCCTAGGGCGATCA
743	743	1.1978	SetName|SetName=duplicate barcodes hubs pos neg#Context|Name=context_canon_term_pos_YDL227C#Barcode|Sequence=GCGGTGCACCA,Start=19,End=29,#Primer5|Sequence=GGGGACCAGGTGCCGTAAG,Start=132,End=150,#Primer3|Sequence=GCGATCCTAGGGCGATCA,Start=1,End=18,	GGGGACCAGGTGCCGTAAGAATGTGTATATTAGTTTAAAAAGTTGTATGTAATAAAAGTAAAATTTAATATTTTGGATGAAAAAAACCATTTTTAGACTTTTTCTTAACTAGAATGCTGGAGCGGTGCACCAGCGATCCTAGGGCGATCA
744	744	4.7358	SetName|SetName=duplicate barcodes hubs pos neg#Context|Name=context_canon_term_pos_YEL059C_A#Barcode|Sequence=ATTGCTTAGGG,Start=19,End=29,#Primer5|Sequence=GGGGACCAGGTGCCGTAAG,Start=132,End=150,#Primer3|Sequence=GCGATCCTAGGGCGATCA,Start=1,End=18,	GGGGACCAGGTGCCGTAAGAAATTACATATACTCTATATAGCACAGTAGTGTGATAAATAAAAAATTTTGCCAAGACTTTTTTAAACTGCACCCGACAGATCAGGTCTGTGCCTACTATGCATTGCTTAGGGGCGATCCTAGGGCGATCA
745	745	4.5553	SetName|SetName=duplicate barcodes hubs pos neg#Context|Name=context_canon_term_pos_YFL009W#Barcode|Sequence=TTCGTAACTAC,Start=19,End=29,#Primer5|Sequence=GGGGACCAGGTGCCGTAAG,Start=132,End=150,#Primer3|Sequence=GCGATCCTAGGGCGATCA,Start=1,End=18,	GGGGACCAGGTGCCGTAAGCCTTTCCCAGAGAATAAGCATTGACTCATACTTAGATAATATAGCTTAATAAGTAGTTATATAATCAGTAAAAAAGTACAATAACAACTTCGTACATTTTATTTCGTAACTACGCGATCCTAGGGCGATCA
746	746	3.7684	SetName|SetName=duplicate barcodes hubs pos neg#Context|Name=context_canon_term_pos_YFR039C#Barcode|Sequence=ACAACTGTGTC,Start=19,End=29,#Primer5|Sequence=GGGGACCAGGTGCCGTAAG,Start=132,End=150,#Primer3|Sequence=GCGATCCTAGGGCGATCA,Start=1,End=18,	GGGGACCAGGTGCCGTAAGTCAATATATAGGTATGTATATGTACATATATACAAACATTTAATAAAAACAATATTGTATGATAACCAAGTTAAAGACCGGAGGTTGTTTCAAATAGCTTGAACAACTGTGTCGCGATCCTAGGGCGATCA
747	747	3.3755	SetName|SetName=duplicate barcodes hubs pos neg#Context|Name=context_canon_term_pos_YGR166W#Barcode|Sequence=ATGAATACCTC,Start=19,End=29,#Primer5|Sequence=GGGGACCAGGTGCCGTAAG,Start=132,End=150,#Primer3|Sequence=GCGATCCTAGGGCGATCA,Start=1,End=18,	GGGGACCAGGTGCCGTAAGGCGGAACAAGTATACATTTTATTAACATAGACTACATACTAATCTGTAACATTTCTATAAAAAAGTTATTATCATCACATTACACGATAGAAACACTTCCATATGAATACCTCGCGATCCTAGGGCGATCA
748	748	2.6275	SetName|SetName=duplicate barcodes hubs pos neg#Context|Name=context_canon_term_pos_YHR200W#Barcode|Sequence=GTATCGTTACC,Start=19,End=29,#Primer5|Sequence=GGGGACCAGGTGCCGTAAG,Start=132,End=150,#Primer3|Sequence=GCGATCCTAGGGCGATCA,Start=1,End=18,	GGGGACCAGGTGCCGTAAGTAGTGTACAAAAATATCTATATGGGTCATATATAAACCAAATAAAGCATATATAACATCTCCCTTCACTCTTCCAGGTTTGAGTACGCTTCCTCTAAATAGGGTATCGTTACCGCGATCCTAGGGCGATCA
749	749	2.6486	SetName|SetName=duplicate barcodes hubs pos neg#Context|Name=context_canon_term_pos_YIR021W#Barcode|Sequence=TTCGCAGATTT,Start=19,End=29,#Primer5|Sequence=GGGGACCAGGTGCCGTAAG,Start=132,End=150,#Primer3|Sequence=GCGATCCTAGGGCGATCA,Start=1,End=18,	GGGGACCAGGTGCCGTAAGTCCTCTTATATAGCATGTAAATAGAAAGTACGTAAAAAAAAGCTACTATTGACTTTATTCTCCGTGAGGGCGGTTCTTTCTGTAGCTGTTGGTTTTTTCCAGTTCGCAGATTTGCGATCCTAGGGCGATCA
750	750	3.5787	SetName|SetName=duplicate barcodes hubs pos neg#Context|Name=context_canon_term_pos_YIR035C#Barcode|Sequence=TCAGTCCTTAG,Start=19,End=29,#Primer5|Sequence=GGGGACCAGGTGCCGTAAG,Start=132,End=150,#Primer3|Sequence=GCGATCCTAGGGCGATCA,Start=1,End=18,	GGGGACCAGGTGCCGTAAGGGATAGCAGGTACATATAAATTGTTACATACTAAGTCGATGAGTCAAAAAAGACTCTTATACATTTATACATTTTGCATTATTATTTTTTTTTTCCAGCGGATCAGTCCTTAGGCGATCCTAGGGCGATCA
751	751	4.2854	SetName|SetName=duplicate barcodes hubs pos neg#Context|Name=context_canon_term_pos_YIL115C#Barcode|Sequence=TGTGAGCCCGC,Start=19,End=29,#Primer5|Sequence=GGGGACCAGGTGCCGTAAG,Start=132,End=150,#Primer3|Sequence=GCGATCCTAGGGCGATCA,Start=1,End=18,	GGGGACCAGGTGCCGTAAGTGATATTTAGCTATATGTACGTTGTTAGTGCCGTTAATAATAAATTCATCCTCTATCATAGAAACAGGGCATGAGAAACGAAGAAAAATTGATATTGTAACATGTGAGCCCGCGCGATCCTAGGGCGATCA
752	752	4.0199	SetName|SetName=duplicate barcodes hubs pos neg#Context|Name=context_canon_term_pos_YJL050W#Barcode|Sequence=GGCGTAAGCGC,Start=19,End=29,#Primer5|Sequence=GGGGACCAGGTGCCGTAAG,Start=132,End=150,#Primer3|Sequence=GCGATCCTAGGGCGATCA,Start=1,End=18,	GGGGACCAGGTGCCGTAAGTTAATCACACACAATTATGTATTTTTATTGGTATATATAATAAACAAATAGATTTCATCAACATTTATTATATAATAACATTTTTGTTTGGGCAAGCACACTGGCGTAAGCGCGCGATCCTAGGGCGATCA
753	753	3.7508	SetName|SetName=duplicate barcodes hubs pos neg#Context|Name=context_canon_term_pos_YJR100C#Barcode|Sequence=TCGAACTAGCC,Start=19,End=29,#Primer5|Sequence=GGGGACCAGGTGCCGTAAG,Start=132,End=150,#Primer3|Sequence=GCGATCCTAGGGCGATCA,Start=1,End=18,	GGGGACCAGGTGCCGTAAGGTGAATTATATATTTAAAAGAATTCTGTAAATACATATTTGACTACGCAGTAATAAAACAATTATTATTCCCAATTAGGGCCCAATCCTAGCATAGCAAAGTTCGAACTAGCCGCGATCCTAGGGCGATCA
754	754	3.0125	SetName|SetName=duplicate barcodes hubs pos neg#Context|Name=context_canon_term_pos_YJL204C#Barcode|Sequence=CGTGCAGTTTT,Start=19,End=29,#Primer5|Sequence=GGGGACCAGGTGCCGTAAG,Start=132,End=150,#Primer3|Sequence=GCGATCCTAGGGCGATCA,Start=1,End=18,	GGGGACCAGGTGCCGTAAGATTCCTATCAATGATTAATTATATTACTCTATATAGGTATGAAGTGCGGAAATAAAAGACTGTTCACATATTAGATTATTCAAGATTACGCGGGCTCTATTTCGTGCAGTTTTGCGATCCTAGGGCGATCA
755	755	3.1761	SetName|SetName=duplicate barcodes hubs pos neg#Context|Name=context_canon_term_pos_YLR064W#Barcode|Sequence=CTAGTGCAGGT,Start=19,End=29,#Primer5|Sequence=GGGGACCAGGTGCCGTAAG,Start=132,End=150,#Primer3|Sequence=GCGATCCTAGGGCGATCA,Start=1,End=18,	GGGGACCAGGTGCCGTAAGCATGCTCATTTTAAGTATATCTAAATATTATTTTGTATATACTCACACTCCTCTATAGAAAGCAAAAAATTTCAAAAACGTTTGAAAAGCTTTGTTTAACGACTAGTGCAGGTGCGATCCTAGGGCGATCA
756	756	2.3499	SetName|SetName=duplicate barcodes hubs pos neg#Context|Name=context_canon_term_pos_YLR298C#Barcode|Sequence=TACTAGACGTG,Start=19,End=29,#Primer5|Sequence=GGGGACCAGGTGCCGTAAG,Start=132,End=150,#Primer3|Sequence=GCGATCCTAGGGCGATCA,Start=1,End=18,	GGGGACCAGGTGCCGTAAGCGCTATCAGATTAGATTATTAAATATTATATGTAGACTATATTTTGCCAAAAAAAACAATAGAGATATCAACAACGAATGAAAATGGTATGATGAGAATAAATACTAGACGTGGCGATCCTAGGGCGATCA
757	757	4.7985	SetName|SetName=duplicate barcodes hubs pos neg#Context|Name=context_canon_term_pos_YLR272C#Barcode|Sequence=TAAGTCCGTAC,Start=19,End=29,#Primer5|Sequence=GGGGACCAGGTGCCGTAAG,Start=132,End=150,#Primer3|Sequence=GCGATCCTAGGGCGATCA,Start=1,End=18,	GGGGACCAGGTGCCGTAAGTCGAACTGACGTTTACCCGTTTCTTCCGTTTTATATTATATGTTATTATATAAATAAAAGCTGTTCATTTCTTTCTTCTTGAAATATGACTTTACCTATCTCTAAGTCCGTACGCGATCCTAGGGCGATCA
758	758	4.611	SetName|SetName=duplicate barcodes hubs pos neg#Context|Name=context_canon_term_pos_YNR049C#Barcode|Sequence=GCAAGTGTCGA,Start=19,End=29,#Primer5|Sequence=GGGGACCAGGTGCCGTAAG,Start=132,End=150,#Primer3|Sequence=GCGATCCTAGGGCGATCA,Start=1,End=18,	GGGGACCAGGTGCCGTAAGATAGCACTATACCTTGCTGAAATAAAGCGAAAAGAACATTTAATGAATATATAGGTATCGTATATGTACTGAATAAAGTGTTTGATACAGAATGCAAGGAGAGCAAGTGTCGAGCGATCCTAGGGCGATCA
759	759	2.1141	SetName|SetName=duplicate barcodes hubs pos neg#Context|Name=context_canon_term_pos_YNL011C#Barcode|Sequence=TCAACGAACGA,Start=19,End=29,#Primer5|Sequence=GGGGACCAGGTGCCGTAAG,Start=132,End=150,#Primer3|Sequence=GCGATCCTAGGGCGATCA,Start=1,End=18,	GGGGACCAGGTGCCGTAAGTGCAACTATGTCGCTCATTAACGGTTATTATAGTGAAGACTACATAATAAAGACATAGATAATAAAAAAGAATCGCGTTTGAACCATGTTTTATTTAACCATTCAACGAACGAGCGATCCTAGGGCGATCA
760	760	1.8042	SetName|SetName=duplicate barcodes hubs pos neg#Context|Name=context_canon_term_pos_YNL231C#Barcode|Sequence=ACTTGCAGACG,Start=19,End=29,#Primer5|Sequence=GGGGACCAGGTGCCGTAAG,Start=132,End=150,#Primer3|Sequence=GCGATCCTAGGGCGATCA,Start=1,End=18,	GGGGACCAGGTGCCGTAAGAGGCAAATTTAGATAGATAATGATAATGCACTATAATATATAATAAATAAAAGAGAATAAAAAGTTTAATCACGTTCCCGCTTCTTTTTCCTAACCATCAAAACTTGCAGACGGCGATCCTAGGGCGATCA
761	761	1.6307	SetName|SetName=duplicate barcodes hubs pos neg#Context|Name=context_canon_term_pos_YOL009C#Barcode|Sequence=GACCTAAAAGC,Start=19,End=29,#Primer5|Sequence=GGGGACCAGGTGCCGTAAG,Start=132,End=150,#Primer3|Sequence=GCGATCCTAGGGCGATCA,Start=1,End=18,	GGGGACCAGGTGCCGTAAGTTTAACAAAGATAGTTTGAAAATAGTGTCTACATAAAAAAACAAACATTTTTGAGCTGGAAAATTATATTTTGTCATGAAGTAATCTATTCTTAACGCGCTTGACCTAAAAGCGCGATCCTAGGGCGATCA
762	762	3.532	SetName|SetName=duplicate barcodes hubs pos neg#Context|Name=context_canon_term_pos_YOL073C#Barcode|Sequence=TTCTCGGGCCA,Start=19,End=29,#Primer5|Sequence=GGGGACCAGGTGCCGTAAG,Start=132,End=150,#Primer3|Sequence=GCGATCCTAGGGCGATCA,Start=1,End=18,	GGGGACCAGGTGCCGTAAGTTTATATCAGCATATACCTACATAAACAAATAAACATAGCAACGGTTTAGCAACATCGTTTACAGCCATGTGAGGCAGTTACTTCTATCATATGTCTGGCTTTTCTCGGGCCAGCGATCCTAGGGCGATCA
763	763	3.7523	SetName|SetName=duplicate barcodes hubs pos neg#Context|Name=context_canon_term_pos_YPL006W#Barcode|Sequence=ACTACAGTTAA,Start=19,End=29,#Primer5|Sequence=GGGGACCAGGTGCCGTAAG,Start=132,End=150,#Primer3|Sequence=GCGATCCTAGGGCGATCA,Start=1,End=18,	GGGGACCAGGTGCCGTAAGCCATAGCAGATTATACTATATTTTACGTAGTGAAAAAATAGGTAAAAATTCGTTAATTATTCTGATGCCACACCAGAAAATCTGTGGGAAAATTTTTCGAGTACTACAGTTAAGCGATCCTAGGGCGATCA
764	764	0.565	SetName|SetName=duplicate barcodes hubs pos neg#Context|Name=context_canon_term_neg_YBL097W#Barcode|Sequence=TAGCGACTAAT,Start=19,End=29,#Primer5|Sequence=GGGGACCAGGTGCCGTAAG,Start=132,End=150,#Primer3|Sequence=GCGATCCTAGGGCGATCA,Start=1,End=18,	GGGGACCAGGTGCCGTAAGTTGATGATCTTTTTTTTTTTTTTTTTTTTTTTTTTTGTGCTGCAAAGTTTCTTAAAGCCTTCGGGCTTACGAAATCCTTTATCGCCGAAAGGGGACCGCTTCTAGCGACTAATGCGATCCTAGGGCGATCA
765	765	4.7269	SetName|SetName=duplicate barcodes hubs pos neg#Context|Name=context_canon_term_neg_YBL075C#Barcode|Sequence=GTTGCCCGTTG,Start=19,End=29,#Primer5|Sequence=GGGGACCAGGTGCCGTAAG,Start=132,End=150,#Primer3|Sequence=GCGATCCTAGGGCGATCA,Start=1,End=18,	GGGGACCAGGTGCCGTAAGTTATTCTTCTATAGTGTTCTATTTAGCTACTTTTTATGTTTAACCTTTTATACGATGGCGGGTAATCTATCCATGATGACGAAAAATTTTTTTTTTTTTTGTGTTGCCCGTTGGCGATCCTAGGGCGATCA
766	766	3.6997	SetName|SetName=duplicate barcodes hubs pos neg#Context|Name=context_canon_term_neg_YBL088C#Barcode|Sequence=TTGTTAAACCC,Start=19,End=29,#Primer5|Sequence=GGGGACCAGGTGCCGTAAG,Start=132,End=150,#Primer3|Sequence=GCGATCCTAGGGCGATCA,Start=1,End=18,	GGGGACCAGGTGCCGTAAGTTGCTATGCAGATGCTTTATACTTCTTTTTTTTGTTTATAGAAATACGAAAAGTAATGTACAAACTCAATGTGATGATGTGCCCAAAAATACAATCGCTGATTTGTTAAACCCGCGATCCTAGGGCGATCA
767	767	2.6218	SetName|SetName=duplicate barcodes hubs pos neg#Context|Name=context_canon_term_neg_YCR032W#Barcode|Sequence=ACTGAGGCCCT,Start=19,End=29,#Primer5|Sequence=GGGGACCAGGTGCCGTAAG,Start=132,End=150,#Primer3|Sequence=GCGATCCTAGGGCGATCA,Start=1,End=18,	GGGGACCAGGTGCCGTAAGGCATCACATCGTAACGCCTTTCTTTAAATGATTCAATTTTTGTAGTTTATATCTTTACTTTTGAAACTGATTTCTCATCCCATCTAGTATTGTAATTGCGTAACTGAGGCCCTGCGATCCTAGGGCGATCA
768	768		SetName|SetName=duplicate barcodes hubs pos neg#Context|Name=context_canon_term_neg_YDR325W#Barcode|Sequence=GCGTGTGACAA,Start=19,End=29,#Primer5|Sequence=GGGGACCAGGTGCCGTAAG,Start=132,End=150,#Primer3|Sequence=GCGATCCTAGGGCGATCA,Start=1,End=18,	GGGGACCAGGTGCCGTAAGAATTGATATGCGAGCTCTTCATCTATTTAAGTTGATTTTTTGGTTGTAAACATATTTGTATTTTATTCTTAGGTTTGTTAATTCTTCTACGCTTACCAGATAGCGTGTGACAAGCGATCCTAGGGCGATCA
769	769	3.2165	SetName|SetName=duplicate barcodes hubs pos neg#Context|Name=context_canon_term_neg_YDR457W#Barcode|Sequence=AAAGTTTCGTA,Start=19,End=29,#Primer5|Sequence=GGGGACCAGGTGCCGTAAG,Start=132,End=150,#Primer3|Sequence=GCGATCCTAGGGCGATCA,Start=1,End=18,	GGGGACCAGGTGCCGTAAGTCATTTTTCGTGTAAATTTATAGCGCCATGTAACCAAGTATTTTAGAACGTCTTTTATTTAAACCTTTAACCATACAACACTTGCCCAAGGAAGAGGAACAGAAAGTTTCGTAGCGATCCTAGGGCGATCA
770	770	0.6297	SetName|SetName=duplicate barcodes hubs pos neg#Context|Name=context_canon_term_neg_YDL205C#Barcode|Sequence=TCAAGTAAGGT,Start=19,End=29,#Primer5|Sequence=GGGGACCAGGTGCCGTAAG,Start=132,End=150,#Primer3|Sequence=GCGATCCTAGGGCGATCA,Start=1,End=18,	GGGGACCAGGTGCCGTAAGACACCATTAATTTGATCAGTCCAAAAACTCTATTATTACTAACTAAAGTTCCCTTTTTTTTTTTTTTTTTTTTTTTTTTCCTTATCTCCTTTATCTTTCAGTTCAAGTAAGGTGCGATCCTAGGGCGATCA
771	771	1.5413	SetName|SetName=duplicate barcodes hubs pos neg#Context|Name=context_canon_term_neg_YER013W#Barcode|Sequence=CTTTAAGTCCT,Start=19,End=29,#Primer5|Sequence=GGGGACCAGGTGCCGTAAG,Start=132,End=150,#Primer3|Sequence=GCGATCCTAGGGCGATCA,Start=1,End=18,	GGGGACCAGGTGCCGTAAGCATTGTTAGCTTTTTATGCATTATAATTATCGAGTTTTATAGACCTATATTTAATTTTTTAACAACTTTATCTCTCTTGAGAATTTTTACATGAAAAAAATCCTTTAAGTCCTGCGATCCTAGGGCGATCA
772	772	2.0026	SetName|SetName=duplicate barcodes hubs pos neg#Context|Name=context_canon_term_neg_YFL054C#Barcode|Sequence=GAGTGCGATTA,Start=19,End=29,#Primer5|Sequence=GGGGACCAGGTGCCGTAAG,Start=132,End=150,#Primer3|Sequence=GCGATCCTAGGGCGATCA,Start=1,End=18,	GGGGACCAGGTGCCGTAAGTTAATATTTTCAATTTTTTACGATTTATAACCTAATTATTAATTTCACGAACTTATTATTTGACGACATACTACATCCGGGAGCCGTGACTTTGTTACCATCGAGTGCGATTAGCGATCCTAGGGCGATCA
773	773	0.5325	SetName|SetName=duplicate barcodes hubs pos neg#Context|Name=context_canon_term_neg_YGR126W#Barcode|Sequence=GGGACACAGTT,Start=19,End=29,#Primer5|Sequence=GGGGACCAGGTGCCGTAAG,Start=132,End=150,#Primer3|Sequence=GCGATCCTAGGGCGATCA,Start=1,End=18,	GGGGACCAGGTGCCGTAAGGTGGCATAGCAACATTTAGTTCGCAATGCGTTTACTTCAGAATCATTCTTTTTTTTTTTTTTTTTTTTTTTTTGCCTCACATTATATTCTTGGCATCTGCCTGGGACACAGTTGCGATCCTAGGGCGATCA
774	774	1.7773	SetName|SetName=duplicate barcodes hubs pos neg#Context|Name=context_canon_term_neg_YGL194C#Barcode|Sequence=GCTACCCATAC,Start=19,End=29,#Primer5|Sequence=GGGGACCAGGTGCCGTAAG,Start=132,End=150,#Primer3|Sequence=GCGATCCTAGGGCGATCA,Start=1,End=18,	GGGGACCAGGTGCCGTAAGTTTAAGAGTTTGCTATTCGGTTAATCTCCCGTTTTTTTTTTTTTTTTTTTTTTTATTTTCCTTTTTTTTTTTTTAATGTTTTTAGCATATTATGTAGAGTGTGCTACCCATACGCGATCCTAGGGCGATCA
775	775	0.6492	SetName|SetName=duplicate barcodes hubs pos neg#Context|Name=context_canon_term_neg_YHL030W_A#Barcode|Sequence=TTCGTTACGAG,Start=19,End=29,#Primer5|Sequence=GGGGACCAGGTGCCGTAAG,Start=132,End=150,#Primer3|Sequence=GCGATCCTAGGGCGATCA,Start=1,End=18,	GGGGACCAGGTGCCGTAAGTTTATTTTTTCCTTGTCTTTTTATCTCTTTTTTTTTGTTTTTCGTTCTCTTTATTTTCAACAACGCCTAGAAAATTTGGTTACCAACCACACTATTGAACAATTCGTTACGAGGCGATCCTAGGGCGATCA
776	776	0.6821	SetName|SetName=duplicate barcodes hubs pos neg#Context|Name=context_canon_term_neg_YIL054W#Barcode|Sequence=TCGTTTCAGAT,Start=19,End=29,#Primer5|Sequence=GGGGACCAGGTGCCGTAAG,Start=132,End=150,#Primer3|Sequence=GCGATCCTAGGGCGATCA,Start=1,End=18,	GGGGACCAGGTGCCGTAAGTGATGTGTGAGTTCCTCTTTTCTTTTTTTCTTTTCTTTTTTCCTTTTTTTTTCTTTTCTTACTCTGTTAATCACTTTCTTTCCTTTTTGTTCATATTGTCGTTCGTTTCAGATGCGATCCTAGGGCGATCA
777	777	0.4191	SetName|SetName=duplicate barcodes hubs pos neg#Context|Name=context_canon_term_neg_YIL084C#Barcode|Sequence=AATGCGAGCCA,Start=19,End=29,#Primer5|Sequence=GGGGACCAGGTGCCGTAAG,Start=132,End=150,#Primer3|Sequence=GCGATCCTAGGGCGATCA,Start=1,End=18,	GGGGACCAGGTGCCGTAAGTTTATTTTATGCTGCAAACCTTCCACTTTAACTTTGTATTATATTACATTAGATGGTTATATTTCAATGTGAGCTCTTTTTGTTTTTGCTTTCTTTTCTCGGAATGCGAGCCAGCGATCCTAGGGCGATCA
778	778	0.5206	SetName|SetName=duplicate barcodes hubs pos neg#Context|Name=context_canon_term_neg_YIL105C#Barcode|Sequence=ACGTCTTAACC,Start=19,End=29,#Primer5|Sequence=GGGGACCAGGTGCCGTAAG,Start=132,End=150,#Primer3|Sequence=GCGATCCTAGGGCGATCA,Start=1,End=18,	GGGGACCAGGTGCCGTAAGATACAAGTATAGTAAACTAGAATGTTTTTATTTCCTTCCATCCATATGTTATATTAATATGTTTCCGTATTTTTGTTTTTGTGTCCCATGCATGGAAGAATAACGTCTTAACCGCGATCCTAGGGCGATCA
779	779	3.3483	SetName|SetName=duplicate barcodes hubs pos neg#Context|Name=context_canon_term_neg_YKL143W#Barcode|Sequence=AGAACTACTAA,Start=19,End=29,#Primer5|Sequence=GGGGACCAGGTGCCGTAAG,Start=132,End=150,#Primer3|Sequence=GCGATCCTAGGGCGATCA,Start=1,End=18,	GGGGACCAGGTGCCGTAAGAGGAGTAGAATGAGATGAGAAAGCACCTACATTACAAGTACTGTGTAGACATGTATACTTAGCCTAGAATGCATTGATGCTAAAATACATCCTGCCCACCGGAGAACTACTAAGCGATCCTAGGGCGATCA
780	780	4.1362	SetName|SetName=duplicate barcodes hubs pos neg#Context|Name=context_canon_term_neg_YLR450W#Barcode|Sequence=CCCAGCTCTGA,Start=19,End=29,#Primer5|Sequence=GGGGACCAGGTGCCGTAAG,Start=132,End=150,#Primer3|Sequence=GCGATCCTAGGGCGATCA,Start=1,End=18,	GGGGACCAGGTGCCGTAAGCTCTTGTAGTTTACATGGTGATACTTTATATCTTTGTATTGTCTAGCTATTCTAAATCATCTGCATGTAATAAGAAGTTGATCAAAATGACTCGCTGCGTAACCCAGCTCTGAGCGATCCTAGGGCGATCA
781	781	4.0161	SetName|SetName=duplicate barcodes hubs pos neg#Context|Name=context_canon_term_neg_YLR277C#Barcode|Sequence=ACAACTCTCTG,Start=19,End=29,#Primer5|Sequence=GGGGACCAGGTGCCGTAAG,Start=132,End=150,#Primer3|Sequence=GCGATCCTAGGGCGATCA,Start=1,End=18,	GGGGACCAGGTGCCGTAAGAAACAGTTACGCATACTAAGTAGACTACTTTATAGAAGTAATACCAAACCAAAATCTGGTTAGAACTGCCTTTTATTGTTTACCTTAATCACTCTTTACGTAACAACTCTCTGGCGATCCTAGGGCGATCA
782	782	0.3431	SetName|SetName=duplicate barcodes hubs pos neg#Context|Name=context_canon_term_neg_YLR055C#Barcode|Sequence=TCTAGCAGCAC,Start=19,End=29,#Primer5|Sequence=GGGGACCAGGTGCCGTAAG,Start=132,End=150,#Primer3|Sequence=GCGATCCTAGGGCGATCA,Start=1,End=18,	GGGGACCAGGTGCCGTAAGTGAGTTGTAATAATAATCATAACCATAATCATAATCATAATTACTCCGCGCGCCGTTTATTTTTTTTTTTTTTTTTTCAGGGCCACTGATCCCTTCATTTTGTCTAGCAGCACGCGATCCTAGGGCGATCA
783	783		SetName|SetName=duplicate barcodes hubs pos neg#Context|Name=context_canon_term_neg_YLL013C#Barcode|Sequence=CCCAGGGAGTG,Start=19,End=29,#Primer5|Sequence=GGGGACCAGGTGCCGTAAG,Start=132,End=150,#Primer3|Sequence=GCGATCCTAGGGCGATCA,Start=1,End=18,	GGGGACCAGGTGCCGTAAGTTAGTGTTATCATCGTTCTCCTTTCACTTTTTACTATTTTTTTTTTTTTTTTTTTTTTTTTTTTTTCCTCCATTTGTCTTTCACTTACTCTATTTTATTTTGCCCAGGGAGTGGCGATCCTAGGGCGATCA
784	784	0.6438	SetName|SetName=duplicate barcodes hubs pos neg#Context|Name=context_canon_term_neg_YLL019C#Barcode|Sequence=TGTGCTGTTAA,Start=19,End=29,#Primer5|Sequence=GGGGACCAGGTGCCGTAAG,Start=132,End=150,#Primer3|Sequence=GCGATCCTAGGGCGATCA,Start=1,End=18,	GGGGACCAGGTGCCGTAAGTGGGTGTTCTCGTTCTACTTTTCTCTTCTTTTTTTCACATCTTTTACTAGTTCCGTTTTTTTTTTTTTTAACTCTTCTTTTTCATTTTCCGGTTTTTAATAATGTGCTGTTAAGCGATCCTAGGGCGATCA
785	785	2.4438	SetName|SetName=duplicate barcodes hubs pos neg#Context|Name=context_canon_term_neg_YMR323W#Barcode|Sequence=ACTTTGAGCTC,Start=19,End=29,#Primer5|Sequence=GGGGACCAGGTGCCGTAAG,Start=132,End=150,#Primer3|Sequence=GCGATCCTAGGGCGATCA,Start=1,End=18,	GGGGACCAGGTGCCGTAAGAGGATTGTCTTGTTTCCTTTTTTTTTTTTTTGTTTTTTTATGACTAAATAAAGTAAATCATATGAGGTTTTATTTTTTATTTCGTTGATTTGGGTTACAGTAACTTTGAGCTCGCGATCCTAGGGCGATCA
786	786	0.3202	SetName|SetName=duplicate barcodes hubs pos neg#Context|Name=context_canon_term_neg_YNL086W#Barcode|Sequence=GTCCAGCCTGT,Start=19,End=29,#Primer5|Sequence=GGGGACCAGGTGCCGTAAG,Start=132,End=150,#Primer3|Sequence=GCGATCCTAGGGCGATCA,Start=1,End=18,	GGGGACCAGGTGCCGTAAGGTAAACATACACATGTATAGCATAATCTTCGATTCCTTTTACCCATTCGTAGATGGCATCGACAGTGTACTTATAATACTACCGTGAGAAACGATATTAAGAGTCCAGCCTGTGCGATCCTAGGGCGATCA
787	787	3.0115	SetName|SetName=duplicate barcodes hubs pos neg#Context|Name=context_canon_term_neg_YNR041C#Barcode|Sequence=CTGTCGACTGA,Start=19,End=29,#Primer5|Sequence=GGGGACCAGGTGCCGTAAG,Start=132,End=150,#Primer3|Sequence=GCGATCCTAGGGCGATCA,Start=1,End=18,	GGGGACCAGGTGCCGTAAGATATAGCGTGCATATACAAGTGTTTAATTGTTCTTTTATTCGATTATTATTTACATGCATTCTTACGTAGATGTCCGTACCTATTTGGGCTTCACGATATTCCTGTCGACTGAGCGATCCTAGGGCGATCA
788	788	2.2456	SetName|SetName=duplicate barcodes hubs pos neg#Context|Name=context_canon_term_neg_YOR390W#Barcode|Sequence=CTGTCGTGAAT,Start=19,End=29,#Primer5|Sequence=GGGGACCAGGTGCCGTAAG,Start=132,End=150,#Primer3|Sequence=GCGATCCTAGGGCGATCA,Start=1,End=18,	GGGGACCAGGTGCCGTAAGGATCTTTTCTTTATACTTTTCCCTGCATAATCATCCCACTTTTTTTTTTTTTTTTTTTAATTCATTTTCAAGATTTTAGACGTTGTATAATACATTTTTACCCTGTCGTGAATGCGATCCTAGGGCGATCA
789	789		SetName|SetName=duplicate barcodes hubs pos neg#Context|Name=context_canon_term_neg_YOR393W#Barcode|Sequence=CGTCTTGCTCG,Start=19,End=29,#Primer5|Sequence=GGGGACCAGGTGCCGTAAG,Start=132,End=150,#Primer3|Sequence=GCGATCCTAGGGCGATCA,Start=1,End=18,	GGGGACCAGGTGCCGTAAGAGGATTGTCTTGTTTCCTTTTTTTTTTTTTTTTTTTTGTTTTTTTATGACTAAATAAAGTAAATCATATGAGGTTTTATTTTTTATTTCGTTGATTTGGGTTCGTCTTGCTCGGCGATCCTAGGGCGATCA
790	790	2.6236	SetName|SetName=duplicate barcodes hubs pos neg#Context|Name=context_canon_term_neg_YOL124C#Barcode|Sequence=AAAAGACTTCT,Start=19,End=29,#Primer5|Sequence=GGGGACCAGGTGCCGTAAG,Start=132,End=150,#Primer3|Sequence=GCGATCCTAGGGCGATCA,Start=1,End=18,	GGGGACCAGGTGCCGTAAGAATGATGCATAAGCCCTTTGTAATTTTAAGATATATTTACTTACTCTTTCTCTTAAAGAAAAAAAAAAAAAAAGAAGAACAATTTATCTATACCTATATTTAAAAAGACTTCTGCGATCCTAGGGCGATCA
791	791	2.7449	SetName|SetName=duplicate barcodes hubs pos neg#Context|Name=context_canon_term_neg_YPR172W#Barcode|Sequence=CCATTGACATT,Start=19,End=29,#Primer5|Sequence=GGGGACCAGGTGCCGTAAG,Start=132,End=150,#Primer3|Sequence=GCGATCCTAGGGCGATCA,Start=1,End=18,	GGGGACCAGGTGCCGTAAGCTGTCCTCTGCTTTTCTTTATCTATTTTGCATACGATTCTGTATTTAATTATTCTGTTTTTTTTTTTTTTTTATTTTTTATTTTCATGTACACAAGAAATCTCCATTGACATTGCGATCCTAGGGCGATCA
792	792	0.3162	SetName|SetName=duplicate barcodes hubs pos neg#Context|Name=context_canon_term_neg_YPR175W#Barcode|Sequence=TTAGGCTCATT,Start=19,End=29,#Primer5|Sequence=GGGGACCAGGTGCCGTAAG,Start=132,End=150,#Primer3|Sequence=GCGATCCTAGGGCGATCA,Start=1,End=18,	GGGGACCAGGTGCCGTAAGATAATGCATCAAAATAAGAACACTTAAACAAGCACGGTAGTGTTGGTACTCTGCCATCTATTTGTATGGATACTTTTTGAATTTTGATGTAACGGATTTCGGTTAGGCTCATTGCGATCCTAGGGCGATCA
793	793	0.3098	SetName|SetName=duplicate barcodes hubs pos neg#Context|Name=context_canon_term_neg_YPR170C#Barcode|Sequence=TTGACGGACCC,Start=19,End=29,#Primer5|Sequence=GGGGACCAGGTGCCGTAAG,Start=132,End=150,#Primer3|Sequence=GCGATCCTAGGGCGATCA,Start=1,End=18,	GGGGACCAGGTGCCGTAAGTATTGTGGTGTTCTTTTCGATATTCTCAGATACCGTTTATTGTGCGCCATACCGATGGATGCAGAAATATCATTTAAATAGTTAAGCCAGGAAGTGGCTGAGTTGACGGACCCGCGATCCTAGGGCGATCA
794	794	0.4544	SetName|SetName=duplicate barcodes hubs pos neg#Context|Name=context_canon_term_neg_YPR120C#Barcode|Sequence=CCCGCTAGAGA,Start=19,End=29,#Primer5|Sequence=GGGGACCAGGTGCCGTAAG,Start=132,End=150,#Primer3|Sequence=GCGATCCTAGGGCGATCA,Start=1,End=18,	GGGGACCAGGTGCCGTAAGATTAGTACTAGTAATGCTCATGAATTCGCATACTCTTTACATTTTCTTTTCTTTTTGCTGAACTAAAAGGAAAAAATTTTTTGCATCTATCTATCTATCTATCCCGCTAGAGAGCGATCCTAGGGCGATCA
795	795	3.9326	SetName|SetName=duplicate barcodes hubs pos neg#Context|Name=context_canon_term_neg_YPL281C#Barcode|Sequence=TTGAGATACGT,Start=19,End=29,#Primer5|Sequence=GGGGACCAGGTGCCGTAAG,Start=132,End=150,#Primer3|Sequence=GCGATCCTAGGGCGATCA,Start=1,End=18,	GGGGACCAGGTGCCGTAAGAGGATTGTCTTGTTTCCTTTTTTTTTTTTTTTTTTTTTGTTTTTTTATGACTAAATAAAGTAAATCATATGAGGTTTTATTTTTTATTTCGTTGATTTGGGTTTGAGATACGTGCGATCCTAGGGCGATCA
796	796	4.8513	SetName|SetName=duplicate barcodes hubs pos neg#Context|Name=context_canon_term_pos_YAL016W#Barcode|Sequence=CTAGCACTCTG,Start=19,End=29,#Primer5|Sequence=GGGGACCAGGTGCCGTAAG,Start=132,End=150,#Primer3|Sequence=GCGATCCTAGGGCGATCA,Start=1,End=18,	GGGGACCAGGTGCCGTAAGTACTAGTTCAAATATATACATACATACACATATGTACACTTGAATGAATAAAAAGTATACATATTAACAACTAGGCCTGCTTTCTTTTCTTTTCTTTTTTTTCTAGCACTCTGGCGATCCTAGGGCGATCA
797	797	3.4463	SetName|SetName=duplicate barcodes hubs pos neg#Context|Name=context_canon_term_pos_YAR007C#Barcode|Sequence=AATCTCGGGTG,Start=19,End=29,#Primer5|Sequence=GGGGACCAGGTGCCGTAAG,Start=132,End=150,#Primer3|Sequence=GCGATCCTAGGGCGATCA,Start=1,End=18,	GGGGACCAGGTGCCGTAAGTGTATCAAATAATCAAGTACTATTTAATCTATGTAACATATGAGAAATGTAAAAAAAAAACTTCTATTTCGTCAAGTTTTTGAAGGGCGGTTCAGCATCTCTAATCTCGGGTGGCGATCCTAGGGCGATCA
798	798	4.5187	SetName|SetName=duplicate barcodes hubs pos neg#Context|Name=context_canon_term_pos_YAL044C#Barcode|Sequence=AGGACCTCTGC,Start=19,End=29,#Primer5|Sequence=GGGGACCAGGTGCCGTAAG,Start=132,End=150,#Primer3|Sequence=GCGATCCTAGGGCGATCA,Start=1,End=18,	GGGGACCAGGTGCCGTAAGACAAAGCTTATACGTACGTAAAGTAATTTCATATATATGTATATATATGTAGGGGAAATAAAACAATAAACTCAACGTGTACACTTATGCTTATGCATTCTAAGGACCTCTGCGCGATCCTAGGGCGATCA
799	799	1.9859	SetName|SetName=duplicate barcodes hubs pos neg#Context|Name=context_canon_term_pos_YBR252W#Barcode|Sequence=GAGTTTGGTCC,Start=19,End=29,#Primer5|Sequence=GGGGACCAGGTGCCGTAAG,Start=132,End=150,#Primer3|Sequence=GCGATCCTAGGGCGATCA,Start=1,End=18,	GGGGACCAGGTGCCGTAAGCTTAGTGTATATACTTTGGCACACTTGTATAATGTATAATAAAATCAGGATAAATCCAGTGTGACCCGGACTGAATTACTGAAACTTTGAAGTGTTAAGGAAGAGTTTGGTCCGCGATCCTAGGGCGATCA
800	800	4.3193	SetName|SetName=duplicate barcodes hubs pos neg#Context|Name=context_canon_term_pos_YDR394W#Barcode|Sequence=TCAATAGGCCC,Start=19,End=29,#Primer5|Sequence=GGGGACCAGGTGCCGTAAG,Start=132,End=150,#Primer3|Sequence=GCGATCCTAGGGCGATCA,Start=1,End=18,	GGGGACCAGGTGCCGTAAGTTACCATATATGCTTCAACGTAGGTCTACATAAAGTATTACGTACATTTCTATCTAGACAACACTAAATGAAATAAATACAGACGCCACTTTTTTATCACGTTCAATAGGCCCGCGATCCTAGGGCGATCA
801	801	2.7085	SetName|SetName=duplicate barcodes hubs pos neg#Context|Name=context_canon_term_pos_YDR375C#Barcode|Sequence=AACAGTTGTAT,Start=19,End=29,#Primer5|Sequence=GGGGACCAGGTGCCGTAAG,Start=132,End=150,#Primer3|Sequence=GCGATCCTAGGGCGATCA,Start=1,End=18,	GGGGACCAGGTGCCGTAAGGTGCTAAGTGGCGCCTTACTACATAACTTGTATATAATAAAAATTCAGAAGATGCTTTAACTTTTTCTCGTTAATAAGACCGAGTTATTTGCTATTACGAACAACAGTTGTATGCGATCCTAGGGCGATCA
802	802	3.1338	SetName|SetName=duplicate barcodes hubs pos neg#Context|Name=context_canon_term_pos_YDR050C#Barcode|Sequence=GGCTAGAATCA,Start=19,End=29,#Primer5|Sequence=GGGGACCAGGTGCCGTAAG,Start=132,End=150,#Primer3|Sequence=GCGATCCTAGGGCGATCA,Start=1,End=18,	GGGGACCAGGTGCCGTAAGGATTAATATAATTATATAAAAATATTATCTTCTTTTCTTTATATCTAGTGTTATGTAAAATAAATTGATGACTACGGAAAGCTTTTTTATATTGTTTCTTTTGGCTAGAATCAGCGATCCTAGGGCGATCA
803	803	2.1604	SetName|SetName=duplicate barcodes hubs pos neg#Context|Name=context_canon_term_pos_YDL044C#Barcode|Sequence=ACAGCTAAATT,Start=19,End=29,#Primer5|Sequence=GGGGACCAGGTGCCGTAAG,Start=132,End=150,#Primer3|Sequence=GCGATCCTAGGGCGATCA,Start=1,End=18,	GGGGACCAGGTGCCGTAAGAAAATTATTCAAACCTTGTAAATAGTGTTATATATATGTGTTAGACTTAAAAGCGCTAATAAACGTTCCTGCTCGCATTTAACTTCTGTTCCAATTTTCCTAACAGCTAAATTGCGATCCTAGGGCGATCA
804	804	1.3425	SetName|SetName=duplicate barcodes hubs pos neg#Context|Name=context_canon_term_pos_YDL227C#Barcode|Sequence=CCTTACGAAGT,Start=19,End=29,#Primer5|Sequence=GGGGACCAGGTGCCGTAAG,Start=132,End=150,#Primer3|Sequence=GCGATCCTAGGGCGATCA,Start=1,End=18,	GGGGACCAGGTGCCGTAAGAATGTGTATATTAGTTTAAAAAGTTGTATGTAATAAAAGTAAAATTTAATATTTTGGATGAAAAAAACCATTTTTAGACTTTTTCTTAACTAGAATGCTGGACCTTACGAAGTGCGATCCTAGGGCGATCA
805	805	4.8023	SetName|SetName=duplicate barcodes hubs pos neg#Context|Name=context_canon_term_pos_YEL059C_A#Barcode|Sequence=AATTCTGCTGA,Start=19,End=29,#Primer5|Sequence=GGGGACCAGGTGCCGTAAG,Start=132,End=150,#Primer3|Sequence=GCGATCCTAGGGCGATCA,Start=1,End=18,	GGGGACCAGGTGCCGTAAGAAATTACATATACTCTATATAGCACAGTAGTGTGATAAATAAAAAATTTTGCCAAGACTTTTTTAAACTGCACCCGACAGATCAGGTCTGTGCCTACTATGCAATTCTGCTGAGCGATCCTAGGGCGATCA
806	806	4.6709	SetName|SetName=duplicate barcodes hubs pos neg#Context|Name=context_canon_term_pos_YFL009W#Barcode|Sequence=CTTGTCTCTTG,Start=19,End=29,#Primer5|Sequence=GGGGACCAGGTGCCGTAAG,Start=132,End=150,#Primer3|Sequence=GCGATCCTAGGGCGATCA,Start=1,End=18,	GGGGACCAGGTGCCGTAAGCCTTTCCCAGAGAATAAGCATTGACTCATACTTAGATAATATAGCTTAATAAGTAGTTATATAATCAGTAAAAAAGTACAATAACAACTTCGTACATTTTATCTTGTCTCTTGGCGATCCTAGGGCGATCA
807	807	4.0576	SetName|SetName=duplicate barcodes hubs pos neg#Context|Name=context_canon_term_pos_YFR039C#Barcode|Sequence=TAGAAGGATCC,Start=19,End=29,#Primer5|Sequence=GGGGACCAGGTGCCGTAAG,Start=132,End=150,#Primer3|Sequence=GCGATCCTAGGGCGATCA,Start=1,End=18,	GGGGACCAGGTGCCGTAAGTCAATATATAGGTATGTATATGTACATATATACAAACATTTAATAAAAACAATATTGTATGATAACCAAGTTAAAGACCGGAGGTTGTTTCAAATAGCTTGATAGAAGGATCCGCGATCCTAGGGCGATCA
808	808	3.1637	SetName|SetName=duplicate barcodes hubs pos neg#Context|Name=context_canon_term_pos_YGR166W#Barcode|Sequence=TCTCGGGTCCA,Start=19,End=29,#Primer5|Sequence=GGGGACCAGGTGCCGTAAG,Start=132,End=150,#Primer3|Sequence=GCGATCCTAGGGCGATCA,Start=1,End=18,	GGGGACCAGGTGCCGTAAGGCGGAACAAGTATACATTTTATTAACATAGACTACATACTAATCTGTAACATTTCTATAAAAAAGTTATTATCATCACATTACACGATAGAAACACTTCCATTCTCGGGTCCAGCGATCCTAGGGCGATCA
809	809	2.017	SetName|SetName=duplicate barcodes hubs pos neg#Context|Name=context_canon_term_pos_YHR200W#Barcode|Sequence=AGACCACAAGG,Start=19,End=29,#Primer5|Sequence=GGGGACCAGGTGCCGTAAG,Start=132,End=150,#Primer3|Sequence=GCGATCCTAGGGCGATCA,Start=1,End=18,	GGGGACCAGGTGCCGTAAGTAGTGTACAAAAATATCTATATGGGTCATATATAAACCAAATAAAGCATATATAACATCTCCCTTCACTCTTCCAGGTTTGAGTACGCTTCCTCTAAATAGGAGACCACAAGGGCGATCCTAGGGCGATCA
810	810	2.7578	SetName|SetName=duplicate barcodes hubs pos neg#Context|Name=context_canon_term_pos_YIR021W#Barcode|Sequence=AAGCTTTCTGC,Start=19,End=29,#Primer5|Sequence=GGGGACCAGGTGCCGTAAG,Start=132,End=150,#Primer3|Sequence=GCGATCCTAGGGCGATCA,Start=1,End=18,	GGGGACCAGGTGCCGTAAGTCCTCTTATATAGCATGTAAATAGAAAGTACGTAAAAAAAAGCTACTATTGACTTTATTCTCCGTGAGGGCGGTTCTTTCTGTAGCTGTTGGTTTTTTCCAGAAGCTTTCTGCGCGATCCTAGGGCGATCA
811	811	3.0826	SetName|SetName=duplicate barcodes hubs pos neg#Context|Name=context_canon_term_pos_YIR035C#Barcode|Sequence=GAGTGCATTGC,Start=19,End=29,#Primer5|Sequence=GGGGACCAGGTGCCGTAAG,Start=132,End=150,#Primer3|Sequence=GCGATCCTAGGGCGATCA,Start=1,End=18,	GGGGACCAGGTGCCGTAAGGGATAGCAGGTACATATAAATTGTTACATACTAAGTCGATGAGTCAAAAAAGACTCTTATACATTTATACATTTTGCATTATTATTTTTTTTTTCCAGCGGAGAGTGCATTGCGCGATCCTAGGGCGATCA
812	812	4.4784	SetName|SetName=duplicate barcodes hubs pos neg#Context|Name=context_canon_term_pos_YIL115C#Barcode|Sequence=AATGCCCTATC,Start=19,End=29,#Primer5|Sequence=GGGGACCAGGTGCCGTAAG,Start=132,End=150,#Primer3|Sequence=GCGATCCTAGGGCGATCA,Start=1,End=18,	GGGGACCAGGTGCCGTAAGTGATATTTAGCTATATGTACGTTGTTAGTGCCGTTAATAATAAATTCATCCTCTATCATAGAAACAGGGCATGAGAAACGAAGAAAAATTGATATTGTAACAAATGCCCTATCGCGATCCTAGGGCGATCA
813	813	3.8175	SetName|SetName=duplicate barcodes hubs pos neg#Context|Name=context_canon_term_pos_YJL050W#Barcode|Sequence=TAGTGTCACGA,Start=19,End=29,#Primer5|Sequence=GGGGACCAGGTGCCGTAAG,Start=132,End=150,#Primer3|Sequence=GCGATCCTAGGGCGATCA,Start=1,End=18,	GGGGACCAGGTGCCGTAAGTTAATCACACACAATTATGTATTTTTATTGGTATATATAATAAACAAATAGATTTCATCAACATTTATTATATAATAACATTTTTGTTTGGGCAAGCACACTTAGTGTCACGAGCGATCCTAGGGCGATCA
814	814	4.2313	SetName|SetName=duplicate barcodes hubs pos neg#Context|Name=context_canon_term_pos_YJR100C#Barcode|Sequence=GCGGCACCTCT,Start=19,End=29,#Primer5|Sequence=GGGGACCAGGTGCCGTAAG,Start=132,End=150,#Primer3|Sequence=GCGATCCTAGGGCGATCA,Start=1,End=18,	GGGGACCAGGTGCCGTAAGGTGAATTATATATTTAAAAGAATTCTGTAAATACATATTTGACTACGCAGTAATAAAACAATTATTATTCCCAATTAGGGCCCAATCCTAGCATAGCAAAGTGCGGCACCTCTGCGATCCTAGGGCGATCA
815	815	2.6159	SetName|SetName=duplicate barcodes hubs pos neg#Context|Name=context_canon_term_pos_YJL204C#Barcode|Sequence=TCGACCGGCTA,Start=19,End=29,#Primer5|Sequence=GGGGACCAGGTGCCGTAAG,Start=132,End=150,#Primer3|Sequence=GCGATCCTAGGGCGATCA,Start=1,End=18,	GGGGACCAGGTGCCGTAAGATTCCTATCAATGATTAATTATATTACTCTATATAGGTATGAAGTGCGGAAATAAAAGACTGTTCACATATTAGATTATTCAAGATTACGCGGGCTCTATTTTCGACCGGCTAGCGATCCTAGGGCGATCA
816	816	2.8287	SetName|SetName=duplicate barcodes hubs pos neg#Context|Name=context_canon_term_pos_YLR064W#Barcode|Sequence=CTCAGTAGCTC,Start=19,End=29,#Primer5|Sequence=GGGGACCAGGTGCCGTAAG,Start=132,End=150,#Primer3|Sequence=GCGATCCTAGGGCGATCA,Start=1,End=18,	GGGGACCAGGTGCCGTAAGCATGCTCATTTTAAGTATATCTAAATATTATTTTGTATATACTCACACTCCTCTATAGAAAGCAAAAAATTTCAAAAACGTTTGAAAAGCTTTGTTTAACGACTCAGTAGCTCGCGATCCTAGGGCGATCA
817	817	2.5598	SetName|SetName=duplicate barcodes hubs pos neg#Context|Name=context_canon_term_pos_YLR298C#Barcode|Sequence=GCGCAGATTGC,Start=19,End=29,#Primer5|Sequence=GGGGACCAGGTGCCGTAAG,Start=132,End=150,#Primer3|Sequence=GCGATCCTAGGGCGATCA,Start=1,End=18,	GGGGACCAGGTGCCGTAAGCGCTATCAGATTAGATTATTAAATATTATATGTAGACTATATTTTGCCAAAAAAAACAATAGAGATATCAACAACGAATGAAAATGGTATGATGAGAATAAAGCGCAGATTGCGCGATCCTAGGGCGATCA
818	818	4.6479	SetName|SetName=duplicate barcodes hubs pos neg#Context|Name=context_canon_term_pos_YLR272C#Barcode|Sequence=GCGAGTCCCAG,Start=19,End=29,#Primer5|Sequence=GGGGACCAGGTGCCGTAAG,Start=132,End=150,#Primer3|Sequence=GCGATCCTAGGGCGATCA,Start=1,End=18,	GGGGACCAGGTGCCGTAAGTCGAACTGACGTTTACCCGTTTCTTCCGTTTTATATTATATGTTATTATATAAATAAAAGCTGTTCATTTCTTTCTTCTTGAAATATGACTTTACCTATCTCGCGAGTCCCAGGCGATCCTAGGGCGATCA
819	819	4.674	SetName|SetName=duplicate barcodes hubs pos neg#Context|Name=context_canon_term_pos_YNR049C#Barcode|Sequence=TGCAGTCGTGC,Start=19,End=29,#Primer5|Sequence=GGGGACCAGGTGCCGTAAG,Start=132,End=150,#Primer3|Sequence=GCGATCCTAGGGCGATCA,Start=1,End=18,	GGGGACCAGGTGCCGTAAGATAGCACTATACCTTGCTGAAATAAAGCGAAAAGAACATTTAATGAATATATAGGTATCGTATATGTACTGAATAAAGTGTTTGATACAGAATGCAAGGAGATGCAGTCGTGCGCGATCCTAGGGCGATCA
820	820	2.6423	SetName|SetName=duplicate barcodes hubs pos neg#Context|Name=context_canon_term_pos_YNL011C#Barcode|Sequence=GCATATTTTCG,Start=19,End=29,#Primer5|Sequence=GGGGACCAGGTGCCGTAAG,Start=132,End=150,#Primer3|Sequence=GCGATCCTAGGGCGATCA,Start=1,End=18,	GGGGACCAGGTGCCGTAAGTGCAACTATGTCGCTCATTAACGGTTATTATAGTGAAGACTACATAATAAAGACATAGATAATAAAAAAGAATCGCGTTTGAACCATGTTTTATTTAACCATGCATATTTTCGGCGATCCTAGGGCGATCA
821	821	1.9507	SetName|SetName=duplicate barcodes hubs pos neg#Context|Name=context_canon_term_pos_YNL231C#Barcode|Sequence=AGTCACCTCTA,Start=19,End=29,#Primer5|Sequence=GGGGACCAGGTGCCGTAAG,Start=132,End=150,#Primer3|Sequence=GCGATCCTAGGGCGATCA,Start=1,End=18,	GGGGACCAGGTGCCGTAAGAGGCAAATTTAGATAGATAATGATAATGCACTATAATATATAATAAATAAAAGAGAATAAAAAGTTTAATCACGTTCCCGCTTCTTTTTCCTAACCATCAAAAGTCACCTCTAGCGATCCTAGGGCGATCA
822	822	1.7131	SetName|SetName=duplicate barcodes hubs pos neg#Context|Name=context_canon_term_pos_YOL009C#Barcode|Sequence=ACGGTGAAAGC,Start=19,End=29,#Primer5|Sequence=GGGGACCAGGTGCCGTAAG,Start=132,End=150,#Primer3|Sequence=GCGATCCTAGGGCGATCA,Start=1,End=18,	GGGGACCAGGTGCCGTAAGTTTAACAAAGATAGTTTGAAAATAGTGTCTACATAAAAAAACAAACATTTTTGAGCTGGAAAATTATATTTTGTCATGAAGTAATCTATTCTTAACGCGCTTACGGTGAAAGCGCGATCCTAGGGCGATCA
823	823	3.2323	SetName|SetName=duplicate barcodes hubs pos neg#Context|Name=context_canon_term_pos_YOL073C#Barcode|Sequence=GACTGCGATCT,Start=19,End=29,#Primer5|Sequence=GGGGACCAGGTGCCGTAAG,Start=132,End=150,#Primer3|Sequence=GCGATCCTAGGGCGATCA,Start=1,End=18,	GGGGACCAGGTGCCGTAAGTTTATATCAGCATATACCTACATAAACAAATAAACATAGCAACGGTTTAGCAACATCGTTTACAGCCATGTGAGGCAGTTACTTCTATCATATGTCTGGCTTGACTGCGATCTGCGATCCTAGGGCGATCA
824	824	3.2633	SetName|SetName=duplicate barcodes hubs pos neg#Context|Name=context_canon_term_pos_YPL006W#Barcode|Sequence=GTGGACTTTAC,Start=19,End=29,#Primer5|Sequence=GGGGACCAGGTGCCGTAAG,Start=132,End=150,#Primer3|Sequence=GCGATCCTAGGGCGATCA,Start=1,End=18,	GGGGACCAGGTGCCGTAAGCCATAGCAGATTATACTATATTTTACGTAGTGAAAAAATAGGTAAAAATTCGTTAATTATTCTGATGCCACACCAGAAAATCTGTGGGAAAATTTTTCGAGTGTGGACTTTACGCGATCCTAGGGCGATCA
825	825	0.6263	SetName|SetName=duplicate barcodes hubs pos neg#Context|Name=context_canon_term_neg_YBL097W#Barcode|Sequence=CTTCTTCGTTG,Start=19,End=29,#Primer5|Sequence=GGGGACCAGGTGCCGTAAG,Start=132,End=150,#Primer3|Sequence=GCGATCCTAGGGCGATCA,Start=1,End=18,	GGGGACCAGGTGCCGTAAGTTGATGATCTTTTTTTTTTTTTTTTTTTTTTTTTTTGTGCTGCAAAGTTTCTTAAAGCCTTCGGGCTTACGAAATCCTTTATCGCCGAAAGGGGACCGCTTCCTTCTTCGTTGGCGATCCTAGGGCGATCA
826	826	4.9618	SetName|SetName=duplicate barcodes hubs pos neg#Context|Name=context_canon_term_neg_YBL075C#Barcode|Sequence=GTAGTATGACC,Start=19,End=29,#Primer5|Sequence=GGGGACCAGGTGCCGTAAG,Start=132,End=150,#Primer3|Sequence=GCGATCCTAGGGCGATCA,Start=1,End=18,	GGGGACCAGGTGCCGTAAGTTATTCTTCTATAGTGTTCTATTTAGCTACTTTTTATGTTTAACCTTTTATACGATGGCGGGTAATCTATCCATGATGACGAAAAATTTTTTTTTTTTTTGTGTAGTATGACCGCGATCCTAGGGCGATCA
827	827	3.3482	SetName|SetName=duplicate barcodes hubs pos neg#Context|Name=context_canon_term_neg_YBL088C#Barcode|Sequence=TGTTCGTCGAT,Start=19,End=29,#Primer5|Sequence=GGGGACCAGGTGCCGTAAG,Start=132,End=150,#Primer3|Sequence=GCGATCCTAGGGCGATCA,Start=1,End=18,	GGGGACCAGGTGCCGTAAGTTGCTATGCAGATGCTTTATACTTCTTTTTTTTGTTTATAGAAATACGAAAAGTAATGTACAAACTCAATGTGATGATGTGCCCAAAAATACAATCGCTGATTGTTCGTCGATGCGATCCTAGGGCGATCA
828	828	2.6468	SetName|SetName=duplicate barcodes hubs pos neg#Context|Name=context_canon_term_neg_YCR032W#Barcode|Sequence=CTTACGTCCTA,Start=19,End=29,#Primer5|Sequence=GGGGACCAGGTGCCGTAAG,Start=132,End=150,#Primer3|Sequence=GCGATCCTAGGGCGATCA,Start=1,End=18,	GGGGACCAGGTGCCGTAAGGCATCACATCGTAACGCCTTTCTTTAAATGATTCAATTTTTGTAGTTTATATCTTTACTTTTGAAACTGATTTCTCATCCCATCTAGTATTGTAATTGCGTACTTACGTCCTAGCGATCCTAGGGCGATCA
829	829	0.605	SetName|SetName=duplicate barcodes hubs pos neg#Context|Name=context_canon_term_neg_YDR325W#Barcode|Sequence=ATTCTATTCAG,Start=19,End=29,#Primer5|Sequence=GGGGACCAGGTGCCGTAAG,Start=132,End=150,#Primer3|Sequence=GCGATCCTAGGGCGATCA,Start=1,End=18,	GGGGACCAGGTGCCGTAAGAATTGATATGCGAGCTCTTCATCTATTTAAGTTGATTTTTTGGTTGTAAACATATTTGTATTTTATTCTTAGGTTTGTTAATTCTTCTACGCTTACCAGATAATTCTATTCAGGCGATCCTAGGGCGATCA
830	830		SetName|SetName=duplicate barcodes hubs pos neg#Context|Name=context_canon_term_neg_YDR457W#Barcode|Sequence=ACATACTGTCA,Start=19,End=29,#Primer5|Sequence=GGGGACCAGGTGCCGTAAG,Start=132,End=150,#Primer3|Sequence=GCGATCCTAGGGCGATCA,Start=1,End=18,	GGGGACCAGGTGCCGTAAGTCATTTTTCGTGTAAATTTATAGCGCCATGTAACCAAGTATTTTAGAACGTCTTTTATTTAAACCTTTAACCATACAACACTTGCCCAAGGAAGAGGAACAGACATACTGTCAGCGATCCTAGGGCGATCA
831	831	0.5922	SetName|SetName=duplicate barcodes hubs pos neg#Context|Name=context_canon_term_neg_YDL205C#Barcode|Sequence=TCCCAAGCAGG,Start=19,End=29,#Primer5|Sequence=GGGGACCAGGTGCCGTAAG,Start=132,End=150,#Primer3|Sequence=GCGATCCTAGGGCGATCA,Start=1,End=18,	GGGGACCAGGTGCCGTAAGACACCATTAATTTGATCAGTCCAAAAACTCTATTATTACTAACTAAAGTTCCCTTTTTTTTTTTTTTTTTTTTTTTTTTCCTTATCTCCTTTATCTTTCAGTTCCCAAGCAGGGCGATCCTAGGGCGATCA
832	832	1.6769	SetName|SetName=duplicate barcodes hubs pos neg#Context|Name=context_canon_term_neg_YER013W#Barcode|Sequence=CCAGCGAGTGT,Start=19,End=29,#Primer5|Sequence=GGGGACCAGGTGCCGTAAG,Start=132,End=150,#Primer3|Sequence=GCGATCCTAGGGCGATCA,Start=1,End=18,	GGGGACCAGGTGCCGTAAGCATTGTTAGCTTTTTATGCATTATAATTATCGAGTTTTATAGACCTATATTTAATTTTTTAACAACTTTATCTCTCTTGAGAATTTTTACATGAAAAAAATCCCAGCGAGTGTGCGATCCTAGGGCGATCA
833	833	2.5579	SetName|SetName=duplicate barcodes hubs pos neg#Context|Name=context_canon_term_neg_YFL054C#Barcode|Sequence=GGTCGCACTTA,Start=19,End=29,#Primer5|Sequence=GGGGACCAGGTGCCGTAAG,Start=132,End=150,#Primer3|Sequence=GCGATCCTAGGGCGATCA,Start=1,End=18,	GGGGACCAGGTGCCGTAAGTTAATATTTTCAATTTTTTACGATTTATAACCTAATTATTAATTTCACGAACTTATTATTTGACGACATACTACATCCGGGAGCCGTGACTTTGTTACCATCGGTCGCACTTAGCGATCCTAGGGCGATCA
834	834	0.5506	SetName|SetName=duplicate barcodes hubs pos neg#Context|Name=context_canon_term_neg_YGR126W#Barcode|Sequence=CGGCTCGAGTG,Start=19,End=29,#Primer5|Sequence=GGGGACCAGGTGCCGTAAG,Start=132,End=150,#Primer3|Sequence=GCGATCCTAGGGCGATCA,Start=1,End=18,	GGGGACCAGGTGCCGTAAGGTGGCATAGCAACATTTAGTTCGCAATGCGTTTACTTCAGAATCATTCTTTTTTTTTTTTTTTTTTTTTTTTTGCCTCACATTATATTCTTGGCATCTGCCTCGGCTCGAGTGGCGATCCTAGGGCGATCA
835	835	1.815	SetName|SetName=duplicate barcodes hubs pos neg#Context|Name=context_canon_term_neg_YGL194C#Barcode|Sequence=CCAGACAGTAA,Start=19,End=29,#Primer5|Sequence=GGGGACCAGGTGCCGTAAG,Start=132,End=150,#Primer3|Sequence=GCGATCCTAGGGCGATCA,Start=1,End=18,	GGGGACCAGGTGCCGTAAGTTTAAGAGTTTGCTATTCGGTTAATCTCCCGTTTTTTTTTTTTTTTTTTTTTTTATTTTCCTTTTTTTTTTTTTAATGTTTTTAGCATATTATGTAGAGTGTCCAGACAGTAAGCGATCCTAGGGCGATCA
836	836	5.0071	SetName|SetName=duplicate barcodes hubs pos neg#Context|Name=context_canon_term_neg_YHL030W_A#Barcode|Sequence=TAGCCTGGTGC,Start=19,End=29,#Primer5|Sequence=GGGGACCAGGTGCCGTAAG,Start=132,End=150,#Primer3|Sequence=GCGATCCTAGGGCGATCA,Start=1,End=18,	GGGGACCAGGTGCCGTAAGTTTATTTTTTCCTTGTCTTTTTATCTCTTTTTTTTTGTTTTTCGTTCTCTTTATTTTCAACAACGCCTAGAAAATTTGGTTACCAACCACACTATTGAACAATAGCCTGGTGCGCGATCCTAGGGCGATCA
837	837	0.6638	SetName|SetName=duplicate barcodes hubs pos neg#Context|Name=context_canon_term_neg_YIL054W#Barcode|Sequence=GAAACCTCCTA,Start=19,End=29,#Primer5|Sequence=GGGGACCAGGTGCCGTAAG,Start=132,End=150,#Primer3|Sequence=GCGATCCTAGGGCGATCA,Start=1,End=18,	GGGGACCAGGTGCCGTAAGTGATGTGTGAGTTCCTCTTTTCTTTTTTTCTTTTCTTTTTTCCTTTTTTTTTCTTTTCTTACTCTGTTAATCACTTTCTTTCCTTTTTGTTCATATTGTCGTGAAACCTCCTAGCGATCCTAGGGCGATCA
838	838		SetName|SetName=duplicate barcodes hubs pos neg#Context|Name=context_canon_term_neg_YIL084C#Barcode|Sequence=GGACTGAACCC,Start=19,End=29,#Primer5|Sequence=GGGGACCAGGTGCCGTAAG,Start=132,End=150,#Primer3|Sequence=GCGATCCTAGGGCGATCA,Start=1,End=18,	GGGGACCAGGTGCCGTAAGTTTATTTTATGCTGCAAACCTTCCACTTTAACTTTGTATTATATTACATTAGATGGTTATATTTCAATGTGAGCTCTTTTTGTTTTTGCTTTCTTTTCTCGGGGACTGAACCCGCGATCCTAGGGCGATCA
839	839	0.4733	SetName|SetName=duplicate barcodes hubs pos neg#Context|Name=context_canon_term_neg_YIL105C#Barcode|Sequence=AAAATCTGTTG,Start=19,End=29,#Primer5|Sequence=GGGGACCAGGTGCCGTAAG,Start=132,End=150,#Primer3|Sequence=GCGATCCTAGGGCGATCA,Start=1,End=18,	GGGGACCAGGTGCCGTAAGATACAAGTATAGTAAACTAGAATGTTTTTATTTCCTTCCATCCATATGTTATATTAATATGTTTCCGTATTTTTGTTTTTGTGTCCCATGCATGGAAGAATAAAAATCTGTTGGCGATCCTAGGGCGATCA
840	840	2.1641	SetName|SetName=duplicate barcodes hubs pos neg#Context|Name=context_canon_term_neg_YKL143W#Barcode|Sequence=CTTAGTATCCT,Start=19,End=29,#Primer5|Sequence=GGGGACCAGGTGCCGTAAG,Start=132,End=150,#Primer3|Sequence=GCGATCCTAGGGCGATCA,Start=1,End=18,	GGGGACCAGGTGCCGTAAGAGGAGTAGAATGAGATGAGAAAGCACCTACATTACAAGTACTGTGTAGACATGTATACTTAGCCTAGAATGCATTGATGCTAAAATACATCCTGCCCACCGGCTTAGTATCCTGCGATCCTAGGGCGATCA
841	841	3.7868	SetName|SetName=duplicate barcodes hubs pos neg#Context|Name=context_canon_term_neg_YLR450W#Barcode|Sequence=AGGTATCGCTG,Start=19,End=29,#Primer5|Sequence=GGGGACCAGGTGCCGTAAG,Start=132,End=150,#Primer3|Sequence=GCGATCCTAGGGCGATCA,Start=1,End=18,	GGGGACCAGGTGCCGTAAGCTCTTGTAGTTTACATGGTGATACTTTATATCTTTGTATTGTCTAGCTATTCTAAATCATCTGCATGTAATAAGAAGTTGATCAAAATGACTCGCTGCGTAAAGGTATCGCTGGCGATCCTAGGGCGATCA
842	842	4.0413	SetName|SetName=duplicate barcodes hubs pos neg#Context|Name=context_canon_term_neg_YLR277C#Barcode|Sequence=TCATACTACAG,Start=19,End=29,#Primer5|Sequence=GGGGACCAGGTGCCGTAAG,Start=132,End=150,#Primer3|Sequence=GCGATCCTAGGGCGATCA,Start=1,End=18,	GGGGACCAGGTGCCGTAAGAAACAGTTACGCATACTAAGTAGACTACTTTATAGAAGTAATACCAAACCAAAATCTGGTTAGAACTGCCTTTTATTGTTTACCTTAATCACTCTTTACGTATCATACTACAGGCGATCCTAGGGCGATCA
843	843	0.3262	SetName|SetName=duplicate barcodes hubs pos neg#Context|Name=context_canon_term_neg_YLR055C#Barcode|Sequence=GGACCTCTTGC,Start=19,End=29,#Primer5|Sequence=GGGGACCAGGTGCCGTAAG,Start=132,End=150,#Primer3|Sequence=GCGATCCTAGGGCGATCA,Start=1,End=18,	GGGGACCAGGTGCCGTAAGTGAGTTGTAATAATAATCATAACCATAATCATAATCATAATTACTCCGCGCGCCGTTTATTTTTTTTTTTTTTTTTTCAGGGCCACTGATCCCTTCATTTTGGGACCTCTTGCGCGATCCTAGGGCGATCA
844	844	0.6351	SetName|SetName=duplicate barcodes hubs pos neg#Context|Name=context_canon_term_neg_YLL013C#Barcode|Sequence=GACGGTTTTAC,Start=19,End=29,#Primer5|Sequence=GGGGACCAGGTGCCGTAAG,Start=132,End=150,#Primer3|Sequence=GCGATCCTAGGGCGATCA,Start=1,End=18,	GGGGACCAGGTGCCGTAAGTTAGTGTTATCATCGTTCTCCTTTCACTTTTTACTATTTTTTTTTTTTTTTTTTTTTTTTTTTTTTCCTCCATTTGTCTTTCACTTACTCTATTTTATTTTGGACGGTTTTACGCGATCCTAGGGCGATCA
845	845	0.636	SetName|SetName=duplicate barcodes hubs pos neg#Context|Name=context_canon_term_neg_YLL019C#Barcode|Sequence=GGCACCTACTA,Start=19,End=29,#Primer5|Sequence=GGGGACCAGGTGCCGTAAG,Start=132,End=150,#Primer3|Sequence=GCGATCCTAGGGCGATCA,Start=1,End=18,	GGGGACCAGGTGCCGTAAGTGGGTGTTCTCGTTCTACTTTTCTCTTCTTTTTTTCACATCTTTTACTAGTTCCGTTTTTTTTTTTTTTAACTCTTCTTTTTCATTTTCCGGTTTTTAATAAGGCACCTACTAGCGATCCTAGGGCGATCA
846	846	2.4987	SetName|SetName=duplicate barcodes hubs pos neg#Context|Name=context_canon_term_neg_YMR323W#Barcode|Sequence=CCAAACTGCTC,Start=19,End=29,#Primer5|Sequence=GGGGACCAGGTGCCGTAAG,Start=132,End=150,#Primer3|Sequence=GCGATCCTAGGGCGATCA,Start=1,End=18,	GGGGACCAGGTGCCGTAAGAGGATTGTCTTGTTTCCTTTTTTTTTTTTTTGTTTTTTTATGACTAAATAAAGTAAATCATATGAGGTTTTATTTTTTATTTCGTTGATTTGGGTTACAGTACCAAACTGCTCGCGATCCTAGGGCGATCA
847	847	0.2973	SetName|SetName=duplicate barcodes hubs pos neg#Context|Name=context_canon_term_neg_YNL086W#Barcode|Sequence=AGGTGCCCATT,Start=19,End=29,#Primer5|Sequence=GGGGACCAGGTGCCGTAAG,Start=132,End=150,#Primer3|Sequence=GCGATCCTAGGGCGATCA,Start=1,End=18,	GGGGACCAGGTGCCGTAAGGTAAACATACACATGTATAGCATAATCTTCGATTCCTTTTACCCATTCGTAGATGGCATCGACAGTGTACTTATAATACTACCGTGAGAAACGATATTAAGAAGGTGCCCATTGCGATCCTAGGGCGATCA
848	848	2.9375	SetName|SetName=duplicate barcodes hubs pos neg#Context|Name=context_canon_term_neg_YNR041C#Barcode|Sequence=GGCCTTGTATG,Start=19,End=29,#Primer5|Sequence=GGGGACCAGGTGCCGTAAG,Start=132,End=150,#Primer3|Sequence=GCGATCCTAGGGCGATCA,Start=1,End=18,	GGGGACCAGGTGCCGTAAGATATAGCGTGCATATACAAGTGTTTAATTGTTCTTTTATTCGATTATTATTTACATGCATTCTTACGTAGATGTCCGTACCTATTTGGGCTTCACGATATTCGGCCTTGTATGGCGATCCTAGGGCGATCA
849	849	2.0532	SetName|SetName=duplicate barcodes hubs pos neg#Context|Name=context_canon_term_neg_YOR390W#Barcode|Sequence=GAGAGCTGTAT,Start=19,End=29,#Primer5|Sequence=GGGGACCAGGTGCCGTAAG,Start=132,End=150,#Primer3|Sequence=GCGATCCTAGGGCGATCA,Start=1,End=18,	GGGGACCAGGTGCCGTAAGGATCTTTTCTTTATACTTTTCCCTGCATAATCATCCCACTTTTTTTTTTTTTTTTTTTAATTCATTTTCAAGATTTTAGACGTTGTATAATACATTTTTACCGAGAGCTGTATGCGATCCTAGGGCGATCA
850	850	5.0958	SetName|SetName=duplicate barcodes hubs pos neg#Context|Name=context_canon_term_neg_YOR393W#Barcode|Sequence=GGCATTCAGGA,Start=19,End=29,#Primer5|Sequence=GGGGACCAGGTGCCGTAAG,Start=132,End=150,#Primer3|Sequence=GCGATCCTAGGGCGATCA,Start=1,End=18,	GGGGACCAGGTGCCGTAAGAGGATTGTCTTGTTTCCTTTTTTTTTTTTTTTTTTTTGTTTTTTTATGACTAAATAAAGTAAATCATATGAGGTTTTATTTTTTATTTCGTTGATTTGGGTTGGCATTCAGGAGCGATCCTAGGGCGATCA
851	851	2.2449	SetName|SetName=duplicate barcodes hubs pos neg#Context|Name=context_canon_term_neg_YOL124C#Barcode|Sequence=GGACATGCACG,Start=19,End=29,#Primer5|Sequence=GGGGACCAGGTGCCGTAAG,Start=132,End=150,#Primer3|Sequence=GCGATCCTAGGGCGATCA,Start=1,End=18,	GGGGACCAGGTGCCGTAAGAATGATGCATAAGCCCTTTGTAATTTTAAGATATATTTACTTACTCTTTCTCTTAAAGAAAAAAAAAAAAAAAGAAGAACAATTTATCTATACCTATATTTAGGACATGCACGGCGATCCTAGGGCGATCA
852	852	4.4239	SetName|SetName=duplicate barcodes hubs pos neg#Context|Name=context_canon_term_neg_YPR172W#Barcode|Sequence=AAGTACAGCGA,Start=19,End=29,#Primer5|Sequence=GGGGACCAGGTGCCGTAAG,Start=132,End=150,#Primer3|Sequence=GCGATCCTAGGGCGATCA,Start=1,End=18,	GGGGACCAGGTGCCGTAAGCTGTCCTCTGCTTTTCTTTATCTATTTTGCATACGATTCTGTATTTAATTATTCTGTTTTTTTTTTTTTTTTATTTTTTATTTTCATGTACACAAGAAATCTAAGTACAGCGAGCGATCCTAGGGCGATCA
853	853	0.3426	SetName|SetName=duplicate barcodes hubs pos neg#Context|Name=context_canon_term_neg_YPR175W#Barcode|Sequence=TACAGCAGTAA,Start=19,End=29,#Primer5|Sequence=GGGGACCAGGTGCCGTAAG,Start=132,End=150,#Primer3|Sequence=GCGATCCTAGGGCGATCA,Start=1,End=18,	GGGGACCAGGTGCCGTAAGATAATGCATCAAAATAAGAACACTTAAACAAGCACGGTAGTGTTGGTACTCTGCCATCTATTTGTATGGATACTTTTTGAATTTTGATGTAACGGATTTCGGTACAGCAGTAAGCGATCCTAGGGCGATCA
854	854	0.3014	SetName|SetName=duplicate barcodes hubs pos neg#Context|Name=context_canon_term_neg_YPR170C#Barcode|Sequence=ACTGCGCTAAC,Start=19,End=29,#Primer5|Sequence=GGGGACCAGGTGCCGTAAG,Start=132,End=150,#Primer3|Sequence=GCGATCCTAGGGCGATCA,Start=1,End=18,	GGGGACCAGGTGCCGTAAGTATTGTGGTGTTCTTTTCGATATTCTCAGATACCGTTTATTGTGCGCCATACCGATGGATGCAGAAATATCATTTAAATAGTTAAGCCAGGAAGTGGCTGAGACTGCGCTAACGCGATCCTAGGGCGATCA
855	855	0.2852	SetName|SetName=duplicate barcodes hubs pos neg#Context|Name=context_canon_term_neg_YPR120C#Barcode|Sequence=AATGTTAAGGA,Start=19,End=29,#Primer5|Sequence=GGGGACCAGGTGCCGTAAG,Start=132,End=150,#Primer3|Sequence=GCGATCCTAGGGCGATCA,Start=1,End=18,	GGGGACCAGGTGCCGTAAGATTAGTACTAGTAATGCTCATGAATTCGCATACTCTTTACATTTTCTTTTCTTTTTGCTGAACTAAAAGGAAAAAATTTTTTGCATCTATCTATCTATCTATAATGTTAAGGAGCGATCCTAGGGCGATCA
856	856	5.3912	SetName|SetName=duplicate barcodes hubs pos neg#Context|Name=context_canon_term_neg_YPL281C#Barcode|Sequence=GGCATTCTGTT,Start=19,End=29,#Primer5|Sequence=GGGGACCAGGTGCCGTAAG,Start=132,End=150,#Primer3|Sequence=GCGATCCTAGGGCGATCA,Start=1,End=18,	GGGGACCAGGTGCCGTAAGAGGATTGTCTTGTTTCCTTTTTTTTTTTTTTTTTTTTTGTTTTTTTATGACTAAATAAAGTAAATCATATGAGGTTTTATTTTTTATTTCGTTGATTTGGGTGGCATTCTGTTGCGATCCTAGGGCGATCA
857	857	4.9443	SetName|SetName=duplicate barcodes hubs pos neg#Context|Name=context_canon_term_pos_YAL016W#Barcode|Sequence=GAAGGTCCGTT,Start=19,End=29,#Primer5|Sequence=GGGGACCAGGTGCCGTAAG,Start=132,End=150,#Primer3|Sequence=GCGATCCTAGGGCGATCA,Start=1,End=18,	GGGGACCAGGTGCCGTAAGTACTAGTTCAAATATATACATACATACACATATGTACACTTGAATGAATAAAAAGTATACATATTAACAACTAGGCCTGCTTTCTTTTCTTTTCTTTTTTTTGAAGGTCCGTTGCGATCCTAGGGCGATCA
858	858	3.0379	SetName|SetName=duplicate barcodes hubs pos neg#Context|Name=context_canon_term_pos_YAR007C#Barcode|Sequence=GCGCATATGGT,Start=19,End=29,#Primer5|Sequence=GGGGACCAGGTGCCGTAAG,Start=132,End=150,#Primer3|Sequence=GCGATCCTAGGGCGATCA,Start=1,End=18,	GGGGACCAGGTGCCGTAAGTGTATCAAATAATCAAGTACTATTTAATCTATGTAACATATGAGAAATGTAAAAAAAAAACTTCTATTTCGTCAAGTTTTTGAAGGGCGGTTCAGCATCTCTGCGCATATGGTGCGATCCTAGGGCGATCA
859	859	4.3591	SetName|SetName=duplicate barcodes hubs pos neg#Context|Name=context_canon_term_pos_YAL044C#Barcode|Sequence=TGGGTCCCTGG,Start=19,End=29,#Primer5|Sequence=GGGGACCAGGTGCCGTAAG,Start=132,End=150,#Primer3|Sequence=GCGATCCTAGGGCGATCA,Start=1,End=18,	GGGGACCAGGTGCCGTAAGACAAAGCTTATACGTACGTAAAGTAATTTCATATATATGTATATATATGTAGGGGAAATAAAACAATAAACTCAACGTGTACACTTATGCTTATGCATTCTATGGGTCCCTGGGCGATCCTAGGGCGATCA
[truncated: 14,096 more rows]
